# Supplementary material
Source: PubMed Central journal article supplement (PMC9709728)
Supplement: aim-olf-M222202-M22-2202_Supplement.pdf [file aim-olf-M222202-M22-2202_Supplement.pdf]

## Supplemental Material\*

Sommer I, Dobrescu A, Ledinger D, et al. Outpatient treatment of confirmed COVID-19. A living, rapid review for the American College of Physicians. *Ann Intern Med.* 2022. [Epub ahead of print]. doi:10.7326/M22-2202

### Contents

|                                                                                                       |           |
|-------------------------------------------------------------------------------------------------------|-----------|
| <b>Supplement Table 1: Inclusion and Exclusion Criteria</b> .....                                     | <b>3</b>  |
| <b>Supplement Table 2: Search Strategy</b> .....                                                      | <b>5</b>  |
| <b>Supplement Table 3: List of Eligible Preprints</b> .....                                           | <b>9</b>  |
| <b>Supplement Table 4: List of Ongoing Studies</b> .....                                              | <b>11</b> |
| <b>Supplement Table 5: Excluded Studies</b> .....                                                     | <b>16</b> |
| Ineligible Study Design (n=1).....                                                                    | 16        |
| Ineligible Publication Type (n=112) .....                                                             | 16        |
| Ineligible Population (n=34) .....                                                                    | 24        |
| Ineligible Intervention (n=13) .....                                                                  | 26        |
| Ineligible Comparison (n=30).....                                                                     | 27        |
| Ineligible Outcome (n=4).....                                                                         | 29        |
| Fulltext Unretrievable (n=3) .....                                                                    | 30        |
| Ineligible Setting (n=12) .....                                                                       | 30        |
| <b>Supplement Table 6: Study Characteristics of Included Studies</b> .....                            | <b>31</b> |
| <b>Supplement Table 7: Definitions for Recovery</b> .....                                             | <b>55</b> |
| <b>Supplement Figure 1: Risk of Bias</b> .....                                                        | <b>56</b> |
| <b>Supplement Figures Summary Plots</b> .....                                                         | <b>57</b> |
| <b>Supplement Figure 2: All-Cause Mortality – Summary Plot</b> .....                                  | <b>57</b> |
| <b>Supplement Figure 3: Serious Adverse Events – Summary Plot</b> .....                               | <b>58</b> |
| <b>Supplement Figures Meta Analyses</b> .....                                                         | <b>59</b> |
| <b>Supplement Figure 4: Serious Adverse Events: Molnupiravir Versus Placebo</b> .....                 | <b>59</b> |
| <b>Supplement Figure 5: Any Adverse Events: Molnupiravir Versus Placebo</b> .....                     | <b>59</b> |
| <b>Supplement Figure 6: Any Adverse Events: Regdanvimab Versus Placebo</b> .....                      | <b>59</b> |
| <b>Supplement Figure 7: Admission to Hospital due to COVID-19: Chloroquine Versus Placebo</b> .....   | <b>60</b> |
| <b>Supplement Figure 8: Serious Adverse Events: Chloroquine Versus Placebo</b> .....                  | <b>60</b> |
| <b>Supplement Figure 9: All-Cause Mortality: Ivermectin Versus Placebo</b> .....                      | <b>60</b> |
| <b>Supplement Figure 10: Recovery: Ivermectin Versus Placebo</b> .....                                | <b>61</b> |
| <b>Supplement Figure 11: Admission to Hospital due to COVID-19: Ivermectin Versus Placebo</b> .....   | <b>61</b> |
| <b>Supplement Figure 12: Any Adverse Events: Ivermectin Versus Placebo</b> .....                      | <b>61</b> |
| <b>Supplement Figure 13: Admission to Hospital due to COVID-19: Nitazoxanide Versus Placebo</b> ..... | <b>62</b> |
| <b>Supplement Figure 14: Serious Adverse Events: Nitazoxanide Versus Placebo</b> .....                | <b>62</b> |
| <b>Supplement Figure 15: Any Adverse Events: Nitazoxanide Versus Placebo</b> .....                    | <b>62</b> |
| <b>Supplement Figure 16: All-Cause Mortality: Convalescent Plasma Versus Placebo</b> .....            | <b>63</b> |
| <b>Supplement Figure 17: Serious Adverse Events: Convalescent Plasma Versus Placebo</b> .....         | <b>63</b> |
| <b>Supplement Figure 18: All-Cause Mortality: Fluvoxamine Versus Placebo</b> .....                    | <b>63</b> |

**Supplement Figure 19: Admission to Hospital due to COVID-19: Fluvoxamine Versus Placebo.....64**  
**Supplement Table 8: Summary of Findings Tables .....65**  
**Supplement Table 9: Subgroup Results .....81**  
**Supplement Table 10: Studies Identified in First Surveillance Search (August 17, 2022) ....85**

\* This supplemental material was provided by the authors to give readers further details on their article. The material was not copyedited.

## Supplement Table 1: Inclusion and Exclusion Criteria

| Category             | Criteria                                                                                                                                                                                                                                                                                                                                                                                                                                                                                                                                                                      |                                                                                                                                                                                                                                                                                                                                                                                                                                        |
|----------------------|-------------------------------------------------------------------------------------------------------------------------------------------------------------------------------------------------------------------------------------------------------------------------------------------------------------------------------------------------------------------------------------------------------------------------------------------------------------------------------------------------------------------------------------------------------------------------------|----------------------------------------------------------------------------------------------------------------------------------------------------------------------------------------------------------------------------------------------------------------------------------------------------------------------------------------------------------------------------------------------------------------------------------------|
|                      | Inclusion                                                                                                                                                                                                                                                                                                                                                                                                                                                                                                                                                                     | Exclusion                                                                                                                                                                                                                                                                                                                                                                                                                              |
| Population           | Adult (18 years or older) outpatients of all races and ethnicities with a symptomatic or asymptomatic, and confirmed diagnosis of COVID-19 (PCR or antigen detected) <sup>1</sup>                                                                                                                                                                                                                                                                                                                                                                                             | <ul style="list-style-type: none"> <li>• Children under age 18</li> <li>• Adults hospitalized due to COVID-19</li> <li>• Adults with confirmed diagnosis of other severe corona viruses such as severe acute respiratory syndrome (SARS) or Middle East respiratory syndrome (MERS), or other viral respiratory diseases, such as influenza.</li> <li>• Adults who were exposed to SARS-CoV-2 without a confirmed infection</li> </ul> |
|                      | <p><b>Subgroups of interest are based on:</b></p> <ul style="list-style-type: none"> <li>• patient characteristics (age, gender, comorbidities)</li> <li>• immunity status (prior SARS-CoV-2 infection, vaccination status, time since infection/vaccination)</li> <li>• type of SARS-CoV-2 variant</li> <li>• symptom duration</li> <li>• symptom severity</li> </ul>                                                                                                                                                                                                        |                                                                                                                                                                                                                                                                                                                                                                                                                                        |
| Interventions        | <ul style="list-style-type: none"> <li>• chloroquine/hydroxychloroquine</li> <li>• convalescent plasma</li> <li>• lopinavir/ritonavir</li> <li>• ivermectin</li> <li>• molnupiravir</li> <li>• monoclonal antibodies approved by FDA or EMA at search date (bebtelovimab, tixagevimab+cilgavimab, sotrovimab, casirivimab+imdevimab, regdanvimab)</li> <li>• nirmatrelvir + ritonavir (Paxlovid)</li> <li>• nitazoxanide</li> <li>• remdesivir</li> <li>• fluvoxamine</li> <li>• antibiotics (azithromycin only)</li> <li>• corticosteroids (inhaled and systemic)</li> </ul> | <ul style="list-style-type: none"> <li>• Adjunct COVID-19 treatments (e.g. anticoagulants/ antiplatelet therapy, vitamins)</li> <li>• Combinations of interventions (except those approved as pair of agents e.g. casirivimab plus imdevimab [REGEN-COV])</li> <li>• Antibiotics other than azithromycin</li> </ul>                                                                                                                    |
| Control intervention | <ul style="list-style-type: none"> <li>• Placebo</li> <li>• Usual care if no placebo-controlled study is available (as defined by study authors)</li> <li>• Different dose or duration of same treatment (if placebo group is present)</li> <li>• Dose: doses that are within the approved dosing range. For drugs that are not approved for COVID, apply doses approved for other indications.</li> <li>• Duration: use the duration defined for the primary outcome in the registration of the trial.</li> </ul>                                                            | <ul style="list-style-type: none"> <li>• Usual care</li> <li>• No treatment</li> <li>• Different treatments</li> </ul>                                                                                                                                                                                                                                                                                                                 |
| Outcomes             | <ul style="list-style-type: none"> <li>• All-cause mortality</li> <li>• COVID-19 specific mortality</li> <li>• Recovery/Clinical improvement</li> <li>• Time to recovery/time to clinical improvement</li> </ul>                                                                                                                                                                                                                                                                                                                                                              | <ul style="list-style-type: none"> <li>• Studies that do not include at least one of the outcomes listed under the inclusion criteria</li> </ul>                                                                                                                                                                                                                                                                                       |

|                        |                                                                                                                                                                                                                                                                          |                                                                                                                                                                                                                                                                                                                          |
|------------------------|--------------------------------------------------------------------------------------------------------------------------------------------------------------------------------------------------------------------------------------------------------------------------|--------------------------------------------------------------------------------------------------------------------------------------------------------------------------------------------------------------------------------------------------------------------------------------------------------------------------|
|                        | <ul style="list-style-type: none"> <li>• Admission to hospital due to COVID-19</li> <li>• Incidence of adverse events (e.g., headache, fatigue, cough)</li> <li>• Incidence of serious adverse events (e.g. anaphylaxis) according to the FDA definition (73)</li> </ul> |                                                                                                                                                                                                                                                                                                                          |
| Timing of intervention | No limitations                                                                                                                                                                                                                                                           |                                                                                                                                                                                                                                                                                                                          |
| Geography              | No limitations                                                                                                                                                                                                                                                           |                                                                                                                                                                                                                                                                                                                          |
| Settings               | <ul style="list-style-type: none"> <li>• Outpatient settings (90%)</li> </ul>                                                                                                                                                                                            | <ul style="list-style-type: none"> <li>• Inpatient settings</li> </ul>                                                                                                                                                                                                                                                   |
| Publication language   | <ul style="list-style-type: none"> <li>• English</li> </ul>                                                                                                                                                                                                              | <ul style="list-style-type: none"> <li>• All other languages</li> </ul>                                                                                                                                                                                                                                                  |
| Study design           | 1. RCTs                                                                                                                                                                                                                                                                  | <ul style="list-style-type: none"> <li>• Nonrandomized controlled trials</li> <li>• Cohort studies</li> <li>• Case-control studies</li> <li>• Case series</li> <li>• Case reports</li> <li>• Nonsystematic reviews</li> <li>• Studies without a control group</li> <li>• Systematic reviews and meta-analyses</li> </ul> |
| Publication type       | Any peer-reviewed publication reporting primary data                                                                                                                                                                                                                     | Abstracts, preprints, publications not reporting primary data (e.g., protocols)                                                                                                                                                                                                                                          |

EMA = European Medicines Agency; FDA = Food and Drug Administration; PCR = Polymerase Chain Reaction; RCT = randomized controlled trial.

## Supplement Table 2: Search Strategy

COVID-19 L-OVE (<https://app.iloveevidence.com/loves/5e6fdb9669c00e4ac072701d>)

4<sup>th</sup> April 2022

| Classification                                  | Search within these results                                                               | Document type                        | Results |
|-------------------------------------------------|-------------------------------------------------------------------------------------------|--------------------------------------|---------|
| Hydroxychloroquine sulfate for (any Population) | mild OR moderate OR early OR outpatient* OR out-patient* OR non-hospital* OR nonhospital* | Randomised trials reporting data     | 76      |
| Hydroxychloroquine sulfate for (any Population) | mild OR moderate OR early OR outpatient* OR out-patient* OR non-hospital* OR nonhospital* | Randomised trials not reporting data | 90      |
| Hydroxychloroquine sulfate for (any Population) | mild OR moderate OR early OR outpatient* OR out-patient* OR non-hospital* OR nonhospital* | Articles awaiting assessment         | 10      |
| Chloroquine for (any Population)                | mild OR moderate OR early OR outpatient* OR out-patient* OR non-hospital* OR nonhospital* | Randomised trials reporting data     | 8       |
| Chloroquine for (any Population)                | mild OR moderate OR early OR outpatient* OR out-patient* OR non-hospital* OR nonhospital* | Randomised trials not reporting data | 28      |
| Chloroquine for (any Population)                | mild OR moderate OR early OR outpatient* OR out-patient* OR non-hospital* OR nonhospital* | Articles awaiting assessment         | 10      |
| Convalescent plasma for (any Population)        | mild OR moderate OR early OR outpatient* OR out-patient* OR non-hospital* OR nonhospital* | Randomised trials reporting data     | 29      |
| Convalescent plasma for (any Population)        | mild OR moderate OR early OR outpatient* OR out-patient* OR non-hospital* OR nonhospital* | Randomised trials not reporting data | 36      |
| Convalescent plasma for (any Population)        | mild OR moderate OR early OR outpatient* OR out-patient* OR non-hospital* OR nonhospital* | Articles awaiting assessment         | 11      |
| Lopinavir for (any Population)                  | mild OR moderate OR early OR outpatient* OR out-patient* OR non-hospital* OR nonhospital* | Randomised trials reporting data     | 22      |
| Lopinavir for (any Population)                  | mild OR moderate OR early OR outpatient* OR out-patient* OR non-hospital* OR nonhospital* | Randomised trials not reporting data | 31      |
| Lopinavir for (any Population)                  | mild OR moderate OR early OR outpatient* OR out-patient* OR non-hospital* OR nonhospital* | Articles awaiting assessment         | 6       |
| Ritonavir for (any Population)                  | mild OR moderate OR early OR outpatient* OR out-patient* OR non-hospital* OR nonhospital* | Randomised trials reporting data     | 27      |
| Ritonavir for (any Population)                  | mild OR moderate OR early OR outpatient* OR out-patient* OR non-hospital* OR nonhospital* | Randomised trials not reporting data | 40      |

| Classification                              | Search within these results                                                               | Document type                        | Results |
|---------------------------------------------|-------------------------------------------------------------------------------------------|--------------------------------------|---------|
| Ritonavir for (any Population)              | mild OR moderate OR early OR outpatient* OR out-patient* OR non-hospital* OR nonhospital* | Articles awaiting assessment         | 9       |
| Ivermectin for (any Population)             | mild OR moderate OR early OR outpatient* OR out-patient* OR non-hospital* OR nonhospital* | Randomised trials reporting data     | 41      |
| Ivermectin for (any Population)             | mild OR moderate OR early OR outpatient* OR out-patient* OR non-hospital* OR nonhospital* | Randomised trials not reporting data | 49      |
| Ivermectin for (any Population)             | mild OR moderate OR early OR outpatient* OR out-patient* OR non-hospital* OR nonhospital* | Articles awaiting assessment         | 7       |
| Molnupiravir for (any Population)           | mild OR moderate OR early OR outpatient* OR out-patient* OR non-hospital* OR nonhospital* | Randomised trials reporting data     | 9       |
| Molnupiravir for (any Population)           | mild OR moderate OR early OR outpatient* OR out-patient* OR non-hospital* OR nonhospital* | Randomised trials not reporting data | 17      |
| Molnupiravir for (any Population)           | mild OR moderate OR early OR outpatient* OR out-patient* OR non-hospital* OR nonhospital* | Articles awaiting assessment         | 4       |
| Bebtelovimab for (any Population)           | mild OR moderate OR early OR outpatient* OR out-patient* OR non-hospital* OR nonhospital* | Randomised trials reporting data     | 1       |
| Bebtelovimab for (any Population)           | mild OR moderate OR early OR outpatient* OR out-patient* OR non-hospital* OR nonhospital* | Randomised trials not reporting data | 0       |
| Bebtelovimab for (any Population)           | mild OR moderate OR early OR outpatient* OR out-patient* OR non-hospital* OR nonhospital* | Articles awaiting assessment         | 0       |
| Tixagevimab/cilgavimab for (any Population) |                                                                                           | Randomised trials reporting data     | 2       |
| Tixagevimab/cilgavimab for (any Population) | mild OR moderate OR early OR outpatient* OR out-patient* OR non-hospital* OR nonhospital* | Randomised trials not reporting data | 4       |
| Tixagevimab/cilgavimab for (any Population) |                                                                                           | Articles awaiting assessment         | 0       |
| Sotrovimab for COVID-19                     |                                                                                           | Randomised trials reporting data     | 8       |
| Sotrovimab for COVID-19                     | mild OR moderate OR early OR outpatient* OR out-patient* OR non-hospital* OR nonhospital* | Randomised trials not reporting data | 9       |
| Sotrovimab for COVID-19                     |                                                                                           | Articles awaiting assessment         | 4       |

| Classification                            | Search within these results                                                               | Document type                        | Results |
|-------------------------------------------|-------------------------------------------------------------------------------------------|--------------------------------------|---------|
| Casirivimab and/or imdevimab for COVID-19 | mild OR moderate OR early OR outpatient* OR out-patient* OR non-hospital* OR nonhospital* | Randomised trials reporting data     | 16      |
| Casirivimab and/or imdevimab for COVID-19 | mild OR moderate OR early OR outpatient* OR out-patient* OR non-hospital* OR nonhospital* | Randomised trials not reporting data | 6       |
| Casirivimab and/or imdevimab for COVID-19 |                                                                                           | Articles awaiting assessment         | 7       |
| Regdanvimab for COVID-19                  |                                                                                           | Randomised trials reporting data     | 4       |
| Regdanvimab for COVID-19                  |                                                                                           | Randomised trials not reporting data | 6       |
| Regdanvimab for COVID-19                  |                                                                                           | Articles awaiting assessment         | 0       |
| Nirmatrelvir for COVID-19                 |                                                                                           | Randomised trials reporting data     | 5       |
| Nirmatrelvir for COVID-19                 |                                                                                           | Randomised trials not reporting data | 8       |
| Nirmatrelvir for COVID-19                 |                                                                                           | Articles awaiting assessment         | 4       |
| Nitazoxanide for COVID-19                 |                                                                                           | Randomised trials reporting data     | 10      |
| Nitazoxanide for COVID-19                 | mild OR moderate OR early OR outpatient* OR out-patient* OR non-hospital* OR nonhospital* | Randomised trials not reporting data | 15      |
| Nitazoxanide for COVID-19                 |                                                                                           | Articles awaiting assessment         | 2       |
| Remdesivir for COVID-19                   | mild OR moderate OR early OR outpatient* OR out-patient* OR non-hospital* OR nonhospital* | Randomised trials reporting data     | 15      |
| Remdesivir for COVID-19                   | mild OR moderate OR early OR outpatient* OR out-patient* OR non-hospital* OR nonhospital* | Randomised trials not reporting data | 14      |
| Remdesivir for COVID-19                   | mild OR moderate OR early OR outpatient* OR out-patient* OR non-hospital* OR nonhospital* | Articles awaiting assessment         | 10      |
| Fluvoxamine for COVID-19                  |                                                                                           | Randomised trials reporting data     | 6       |

| Classification               | Search within these results                                                               | Document type                        | Results |
|------------------------------|-------------------------------------------------------------------------------------------|--------------------------------------|---------|
| Fluvoxamine for COVID-19     | mild OR moderate OR early OR outpatient* OR out-patient* OR non-hospital* OR nonhospital* | Randomised trials not reporting data | 10      |
| Fluvoxamine for COVID-19     |                                                                                           | Articles awaiting assessment         | 2       |
| Azithromycin for COVID-19    | mild OR moderate OR early OR outpatient* OR out-patient* OR non-hospital* OR nonhospital* | Randomised trials reporting data     | 16      |
| Azithromycin for COVID-19    | mild OR moderate OR early OR outpatient* OR out-patient* OR non-hospital* OR nonhospital* | Randomised trials not reporting data | 30      |
| Azithromycin for COVID-19    | mild OR moderate OR early OR outpatient* OR out-patient* OR non-hospital* OR nonhospital* | Articles awaiting assessment         | 6       |
| Corticosteroids for COVID-19 | mild OR moderate OR early OR outpatient* OR out-patient* OR non-hospital* OR nonhospital* | Randomised trials reporting data     | 43      |
| Corticosteroids for COVID-19 | mild OR moderate OR early OR outpatient* OR out-patient* OR non-hospital* OR nonhospital* | Randomised trials not reporting data | 70      |
| Corticosteroids for COVID-19 | mild OR moderate OR early OR outpatient* OR out-patient* OR non-hospital* OR nonhospital* | Articles awaiting assessment         | 30      |
|                              |                                                                                           |                                      |         |
|                              |                                                                                           | Total                                | 923     |



### Supplement Table 3: List of Eligible Preprints

| Author, Year                          | Title<br>Trial name                                                                                                                                                                                   | Registration number |
|---------------------------------------|-------------------------------------------------------------------------------------------------------------------------------------------------------------------------------------------------------|---------------------|
| <b>Antiviral drugs</b>                |                                                                                                                                                                                                       |                     |
| <i>Lopinavir/Ritonavir</i>            |                                                                                                                                                                                                       |                     |
| Lowe, 2022(74)                        | Favipiravir, lopinavir-ritonavir or combination therapy (FLARE): a randomised, double blind, 2x2 factorial placebo-controlled trial of early antiviral therapy in COVID-19<br>FLARE                   | NCT04499677         |
| <b>Monoclonal antibodies</b>          |                                                                                                                                                                                                       |                     |
| <i>Bebtelovimab</i>                   |                                                                                                                                                                                                       |                     |
| Dougan, 2022 (75)                     | Bebtelovimab, alone or together with bamlanivimab and etesevimab, as a broadly neutralizing monoclonal antibody treatment for mild to moderate, ambulatory COVID-19<br>NR                             | NCT04634409         |
| <i>Chloroquine/Hydroxychloroquine</i> |                                                                                                                                                                                                       |                     |
| Amaravadi, 2021(76)                   | Hydroxychloroquine for SARS-CoV-2 positive patients quarantined at home: The first interim analysis of a remotely conducted randomized clinical trial<br>NR                                           | NCT04329923         |
| <i>Ivermectin</i>                     |                                                                                                                                                                                                       |                     |
| Biber, 2021(77)                       | Favorable outcome on viral load and culture viability using Ivermectin in early treatment of non-hospitalized patients with mild COVID-19 – A double-blind, randomized placebo-controlled trial<br>NR | NCT044297411        |
| Mohan, 2021(78)                       | Ivermectin in mild and moderate COVID-19 (RIVET-COV): a randomized, placebo-controlled trial<br>RIVET-COV                                                                                             | CTRI/2020/06/026001 |
| <i>Nitazoxanide</i>                   |                                                                                                                                                                                                       |                     |
| Silva, 2021(79)                       | Efficacy of Nitazoxanide in reducing the viral load in COVID-19 patients. Randomized, placebo-controlled, single-blinded, parallel group, pilot study<br>NR                                           | NCT04463264         |
| <b>Other drugs</b>                    |                                                                                                                                                                                                       |                     |
| <i>Corticosteroids</i>                |                                                                                                                                                                                                       |                     |
| Clemency, 2021(80)                    | A randomized controlled trial of inhaled ciclesonide for outpatient treatment of symptomatic COVID-19 infections<br>NR                                                                                | NCT04377711         |

| Author, Year                          | Title<br>Trial name                                                                                                                                                                                       | Registration number |
|---------------------------------------|-----------------------------------------------------------------------------------------------------------------------------------------------------------------------------------------------------------|---------------------|
| <b>Antiviral drugs</b>                |                                                                                                                                                                                                           |                     |
| <b>Lopinavir/Ritonavir</b>            |                                                                                                                                                                                                           |                     |
| Lowe, 2022(74)                        | Favipiravir, lopinavir-ritonavir or combination therapy (FLARE): a randomised, double blind, 2x2 factorial placebo-controlled trial of early antiviral therapy in COVID-19<br><br>FLARE                   | NCT04499677         |
| <b>Monoclonal antibodies</b>          |                                                                                                                                                                                                           |                     |
| <b>Bebtelovimab</b>                   |                                                                                                                                                                                                           |                     |
| Dougan, 2022(75)                      | Bebtelovimab, alone or together with bamlanivimab and etesevimab, as a broadly neutralizing monoclonal antibody treatment for mild to moderate, ambulatory COVID-19<br><br>NR                             | NCT04634409         |
| <b>Chloroquine/Hydroxychloroquine</b> |                                                                                                                                                                                                           |                     |
| Amaravadi, 2021(76)                   | Hydroxychloroquine for SARS-CoV-2 positive patients quarantined at home: The first interim analysis of a remotely conducted randomized clinical trial<br><br>NR                                           | NCT04329923         |
| <b>Ivermectin</b>                     |                                                                                                                                                                                                           |                     |
| Biber, 2021(77)                       | Favorable outcome on viral load and culture viability using Ivermectin in early treatment of non-hospitalized patients with mild COVID-19 – A double-blind, randomized placebo-controlled trial<br><br>NR | NCT044297411        |
| Mohan, 2021(78)                       | Ivermectin in mild and moderate COVID-19 (RIVET-COV): a randomized, placebo-controlled trial<br><br>RIVET-COV                                                                                             | CTRI/2020/06/026001 |
| <b>Nitazoxanide</b>                   |                                                                                                                                                                                                           |                     |
| Silva, 2021(79)                       | Efficacy of Nitazoxanide in reducing the viral load in COVID-19 patients. Randomized, placebo-controlled, single-blinded, parallel group, pilot study<br><br>NR                                           | NCT04463264         |
| <b>Other drugs</b>                    |                                                                                                                                                                                                           |                     |
| <b>Corticosteroids</b>                |                                                                                                                                                                                                           |                     |
| Clemency, 2021(80)                    | A randomized controlled trial of inhaled ciclesonide for outpatient treatment of symptomatic COVID-19 infections<br><br>NR                                                                                | NCT04377711         |

## Supplement Table 4: List of Ongoing Studies

| Title                                                                                                                                                                                                                                                                           | Study Completion Date <sup>a</sup> |
|---------------------------------------------------------------------------------------------------------------------------------------------------------------------------------------------------------------------------------------------------------------------------------|------------------------------------|
| Registration Number                                                                                                                                                                                                                                                             |                                    |
| Trial Name                                                                                                                                                                                                                                                                      |                                    |
| <i>Antiviral drugs</i>                                                                                                                                                                                                                                                          |                                    |
| <i>Lopinavir/Ritonavir</i>                                                                                                                                                                                                                                                      |                                    |
| Adaptive Randomized trial for therapy of CORona virus disease 2019 at home with oral antivirals                                                                                                                                                                                 | NR                                 |
| <a href="#">EudraCT 2020-001528-32</a>                                                                                                                                                                                                                                          |                                    |
| Trial of Early Therapies During Non-hospitalized Outpatient Window for COVID-19                                                                                                                                                                                                 | June 1, 2022                       |
| <a href="#">NCT04372628</a>                                                                                                                                                                                                                                                     |                                    |
| A randomized, open-label study to evaluate the efficacy and safety of Lopinavir-Ritonavir in patients with mild novel coronavirus pneumonia (COVID-19)                                                                                                                          | February 2, 2021                   |
| <a href="#">ChiCTR2000029539</a>                                                                                                                                                                                                                                                |                                    |
| <i>Molnupiravir</i>                                                                                                                                                                                                                                                             |                                    |
| Efficacy and Safety of Molnupiravir (MK-4482) in Non-Hospitalized Adult Participants With COVID-19 (MK-4482-002)                                                                                                                                                                | May 5, 2022                        |
| <a href="#">NCT04575597</a>                                                                                                                                                                                                                                                     |                                    |
| <i>Nirmatrelvir/Ritonavir</i>                                                                                                                                                                                                                                                   |                                    |
| An interventional efficacy and safety, phase 2/3, double-blind, 2 arm study to investigate orally administered pf 07321332/ritonavir compared with placebo in nonhospitalized symptomatic adult participants with covid-19 who are at low risk of progressing to severe illness | November 30, 2022                  |
| <a href="#">NCT05011513</a>                                                                                                                                                                                                                                                     |                                    |
| <i>Remdesivir</i>                                                                                                                                                                                                                                                               |                                    |
| A Phase 1b/2a Study in Participants With Early Stage COVID-19 to Evaluate the Safety, Efficacy, and Pharmacokinetics of Remdesivir Administered by Inhalation                                                                                                                   | March 22, 2021                     |
| <a href="#">NCT04539262</a>                                                                                                                                                                                                                                                     |                                    |
| WHO Public Health Emergency "Solidarity" Clinical Trial for COVID-19 Treatments                                                                                                                                                                                                 | December 31, 2021                  |
| <a href="#">NCT04647669</a>                                                                                                                                                                                                                                                     |                                    |
| <i>Monoclonal antibodies</i>                                                                                                                                                                                                                                                    |                                    |
| <i>Casirivimab/Imdevimab</i>                                                                                                                                                                                                                                                    |                                    |
| Adaptive Platform Treatment Trial for Outpatients With COVID-19 (Adapt Out COVID)                                                                                                                                                                                               | June 22, 2023                      |
| <a href="#">NCT04518410</a>                                                                                                                                                                                                                                                     |                                    |
| A Phase 2 Study to Assess the Virologic Efficacy of REGN10933+REGN10987 Across Different Dose Regimens in Outpatients With SARS-CoV-2 Infection                                                                                                                                 | September 21, 2021                 |
| <a href="#">NCT04666441</a>                                                                                                                                                                                                                                                     |                                    |
| Adaptive, randomized, placebo-controlled trial to evaluate the efficacy of monoclonal antibodies in outpatients with mild or moderate COVID-19                                                                                                                                  | NR                                 |
| <a href="#">EudraCT 2021-002612-31</a>                                                                                                                                                                                                                                          |                                    |
| <i>Tixagevimab/cilgavimab</i>                                                                                                                                                                                                                                                   |                                    |
| A Phase III Randomized, Double-blind, Placebo-controlled, Multicenter Study to Determine the Safety and Efficacy of AZD7442 for the Treatment of COVID-19 in Non-hospitalized Adults                                                                                            | October 21, 2022                   |
| <a href="#">NCT04723394</a>                                                                                                                                                                                                                                                     |                                    |

| Title                                                                                                                                                                                                                                                                                                                             | Study Completion Date <sup>a</sup> |
|-----------------------------------------------------------------------------------------------------------------------------------------------------------------------------------------------------------------------------------------------------------------------------------------------------------------------------------|------------------------------------|
| Registration Number                                                                                                                                                                                                                                                                                                               |                                    |
| Trial Name                                                                                                                                                                                                                                                                                                                        |                                    |
| <i>Antibiotic or antiparasitic drugs</i>                                                                                                                                                                                                                                                                                          |                                    |
| <i>Azithromycin</i>                                                                                                                                                                                                                                                                                                               |                                    |
| <i>Chloroquine/hydroxychloroquine</i>                                                                                                                                                                                                                                                                                             |                                    |
| Preventing SARS-CoV-2 virus infection and severity of COVID-19 diseases during pregnancy with hydroxychloroquine<br><a href="#">EudraCT 2020-001587-29</a>                                                                                                                                                                        | NR                                 |
| Pilot trial on early treatment with hydroxychloroquine in patients with COVID-19 who do not have hospital admission at diagnosis.<br><a href="#">EudraCT 2020-002449-41</a>                                                                                                                                                       | NR                                 |
| Effectiveness of Hydroxychloroquine in Covid-19 Patients: A Single Centred Single-blind RCT Study<br><a href="#">NCT04328272</a>                                                                                                                                                                                                  | June 28, 2020                      |
| Hydroxychloroquine for Outpatients With Confirmed COVID-19<br><a href="#">NCT04342169</a>                                                                                                                                                                                                                                         | November 3, 2021                   |
| Pragmatic, Double-blind, Placebo-controlled Randomized Clinical Trial, Evaluating Hydroxychloroquine for Prevention of Hospitalization and Respiratory Complications in Non-hospitalized Patients With Confirmed or Probable COVID-19<br><a href="#">NCT04466540</a>                                                              | September 28, 2021                 |
| Double-blind, Randomized, Prospective, Parallel Study to Demonstrate the Efficacy and Safety of Outpatient Treatment of the Fixed Combination of Hydroxychloroquine With Azithromycin Versus Hydroxychloroquine Treatment and Placebo Treatment in Patients Diagnosed With Mild COVID-19 Infection<br><a href="#">NCT04964583</a> | August 2021                        |
| Efficacy and Safety of the Use of Hydroxychloroquine, Favipiravir or Hydroxychloroquine + Favipiravir in Early SARS-CoV-2 (COVID-19) Treatment<br><a href="#">NCT04981379</a>                                                                                                                                                     | February 16, 2021                  |
| Adaptive Randomized trial for therapy of Corona virus disease 2019 at home with oral antivirals<br><a href="#">EudraCT 2020-001528-32</a>                                                                                                                                                                                         | NR                                 |
| <i>Ivermectin</i>                                                                                                                                                                                                                                                                                                                 |                                    |
| ACTIV-6: COVID-19 Outpatient Randomized Trial to Evaluate Efficacy of Repurposed Medications<br><a href="#">NCT04885530</a>                                                                                                                                                                                                       | March 2023                         |
| Prevention and Treatment for COVID -19 Associated Severe Pneumonia in The Gambia: a Single-Blinded Randomised Clinical Trial<br><a href="#">NCT04703608</a>                                                                                                                                                                       | July 2022                          |
| Ivermectin and Doxycycline in Combination or Ivermectin Alone for the Treatment of Adult Bangladeshi Patients Hospitalized for COVID-19: a Randomised, Double-blind, Placebo-controlled Trial.<br><a href="#">NCT04407130</a>                                                                                                     | November 20, 2020                  |
| Multicenter, Double-blind, Randomized, Placebo-controlled Study to Assess the Efficacy, Safety and Tolerability of Ivermectin in Mild Virus-positive Subjects (SARS-CoV)-2 With or Without Symptoms<br><a href="#">NCT04407507</a>                                                                                                | January 29, 2021                   |

| Title<br>Registration Number<br>Trial Name                                                                                                                                                                                                                            | Study Completion Date <sup>a</sup> |
|-----------------------------------------------------------------------------------------------------------------------------------------------------------------------------------------------------------------------------------------------------------------------|------------------------------------|
| A Randomized Double-blinded Placebo-controlled Outpatient Clinical Trial in High Risk Population Confirmed COVID-19 Patients Using Ivermectin and Doxycycline to Prevent COVID-19 Illness-related Hospitalization<br><a href="#">NCT04729140</a>                      | March 28, 2022                     |
| Efficacy of Ivermectin in Outpatients With Non-severe COVID-19: A Randomized Controlled Trial<br><a href="#">NCT04834115</a>                                                                                                                                          | May 30, 2021                       |
| Randomized, Double-blind, Placebo-controlled Clinical Trial to Study the Efficacy and Therapeutic Safety of Ivermectin Versus Placebo Associated With Standard of Care Treatment in the Early Phase of Coronavirus Infection (COVID19)<br><a href="#">NCT04836299</a> | December 5, 2021                   |
| Safety and Efficacy and of Ivermectin for the Prevention of Severe Disease in Patients With COVID-19: A Randomized, Controlled, Double-Blind Clinical Study.<br><a href="#">NCT04886362</a>                                                                           | December 2021                      |
| Randomized phase iia clinical trial to compare the efficacy of ivermectin versus placebo to obtain negative pcr results in patients with early phase COVID-19<br><a href="#">EC INS No PER-034-20</a>                                                                 | NR                                 |
| A Placebo-controlled, Randomized, Double-blind Study in COvid-19 Patients With iveRmectin; An inVEstigator iniTiaTED Trial<br><a href="#">NCT04703205</a>                                                                                                             | May 31, 2022                       |
| A randomized double-blind placebo-controlled trial of oral ivermectin for outpatient treatment of those at high risk for hospitalization due to COVID-19<br><a href="#">ACTRN12620000982910</a>                                                                       | NR                                 |
| Ivermectin Treatment Efficacy in Covid-19 High Risk Patients (I-TECH Study): A Multicenter Open-label Randomized Controlled Trial<br><a href="#">NCT04920942</a>                                                                                                      | October 31, 2021                   |
| A randomized control trial to assess the efficacy and safety of ivermectin in the treatment of mild to moderate COVID 19 patients<br><a href="#">SLCTR/2021/020</a> and <a href="#">EC-21-EM02</a> and <a href="#">U1111-1266-8924</a>                                | NR                                 |
| Randomized Phase IIA Clinical Trial to Evaluate the Efficacy of Ivermectin to Obtain Negative PCR Results in Patients With Early Phase COVID-19<br><a href="#">NCT04635943</a>                                                                                        | April 30, 2021                     |
| Evaluation of the effect of Ivermectin in treatment of outpatients with COVID-19<br><a href="#">IRCT20111224008507N4</a>                                                                                                                                              | NR                                 |
| Effectiveness of Ivermectin on Outpatient Treatment of Covid-19 Patients<br><a href="#">IRCT20210213050344N1</a>                                                                                                                                                      | NR                                 |
| A randomized, double-blind, placebo-controlled study to assess the safety and efficacy of ivermectin in asymptomatic and mild severity COVID-19 patients<br><a href="#">EudraCT 2021-000166-15</a>                                                                    | NR                                 |

| Title<br>Registration Number<br>Trial Name                                                                                                                                                                                                                                                                                               | Study Completion Date <sup>a</sup> |
|------------------------------------------------------------------------------------------------------------------------------------------------------------------------------------------------------------------------------------------------------------------------------------------------------------------------------------------|------------------------------------|
| Ivermectin vs. Placebo for the Treatment of Patients With Mild to Moderate COVID-19 to Prevent Progression to Severe Infection and to Decrease Viral Shedding - A Double Blind , Randomized Controlled Trial<br><br><a href="#">NCT04429711</a>                                                                                          | October 31, 2020                   |
| Evaluation of the Impact of the Administration of Single Dose of Ivermectin in the Early Phase of COVID-19 on the Time to Negativation of the SARS-COV-2 Viral Load Determinated by RT-PCR<br><br><a href="#">NCT05040724</a>                                                                                                            | June 2022                          |
| A Phase III Confirmatory Study of K-237-Multi-regional, Multi-center, Placebo Controlled, Randomized, Double Blind, Parallel Group Controlled Trial in Patients With Mild COVID-19<br><br><a href="#">NCT05056883</a>                                                                                                                    | September 30, 2022                 |
| A multicentre, phase III, double-blind, randomised, parallel, placebo-controlled trial to assess efficacy and safety of early administration of Ivermectin during 3 consecutive days to prevent SARS CoV-2 (COVID-19) hospitalisation in adults older than 50 years of age<br><br><a href="#">EudraCT 2020-005015-40</a>                 | NR                                 |
| A Phase 2 Double-blind Randomized Placebo-controlled Trial to Assess the Efficacy of Ivermectin in Combination With Favipiravir in Mild-to-moderate COVID-19 Adult Patients<br><br><a href="#">NCT05155527</a>                                                                                                                           | June 2022                          |
| In vivo use of ivermectin (IVR) for treatment for corona virus infected patients: a randomized controlled trial<br><br><a href="#">ChiCTR2000033627</a>                                                                                                                                                                                  | NR                                 |
| Pragmatic study "CORIVER": Ivermectin as antiviral treatment for patients infected by SARS-COV2 (COVID-19)<br><br><a href="#">EudraCT 2020-001971-33</a>                                                                                                                                                                                 | NR                                 |
| Multicenter, randomized, double-blind, placebo-controlled study investigating efficacy, safety and tolerability of ivermectin HUV-19 in patients with proven SARS-CoV-2 infection (COVID-19) and man.<br><br><a href="#">EudraCT 2020-002091-12</a>                                                                                      | NR                                 |
| <i>Nitazoxanide</i>                                                                                                                                                                                                                                                                                                                      |                                    |
| The C3 Nitazoxanide for Mild to Moderate COVID-19 in HIV-infected and HIV-uninfected Adults With Enhanced Risk: a Double-blind, Randomised, Placebo-controlled Trial in a Resource-poor Setting<br><br><a href="#">NCT04523090</a>                                                                                                       | February 2022                      |
| Phase 3, Randomized, Double-Blind, Placebo-Controlled Trial to Evaluate Efficacy and Safety of Nitazoxanide for Treatment of Mild or Moderate COVID-19 in Subjects at High Risk of Severe Illness<br><br><a href="#">NCT05157243</a>                                                                                                     | May 2022                           |
| Prospective, Randomized, Double-blind, Parallel, Placebo Controlled Study to Evaluate the Safety and Efficacy of Nitazoxanide 600 mg Three Times a Day to Treat Ambulatory Adult Subjects Diagnosed With COVID-19 With Mild Symptoms Assisted in the Public Health System of the City of Mesquita -RJ<br><br><a href="#">NCT04441398</a> | September 2020                     |
| Phase 3, Randomized, Double-Blind, Placebo-Controlled Trial to Evaluate Efficacy and Safety of Nitazoxanide in the Treatment of Mild COVID-19 in Subjects Not at High Risk of Severe Illness<br><br><a href="#">NCT05157269</a>                                                                                                          | April 2022                         |
| <i>Convalescent plasma</i>                                                                                                                                                                                                                                                                                                               |                                    |

| Title<br>Registration Number<br>Trial Name                                                                                                                                       | Study Completion Date <sup>a</sup> |
|----------------------------------------------------------------------------------------------------------------------------------------------------------------------------------|------------------------------------|
| Reconvalescent Plasma / Camostat Mesylate Early in Sars-CoV-2 Q-PCR (COVID-19) Positive High-risk Individuals<br><a href="#">NCT04681430</a>                                     | October 29, 2021                   |
| Phase I/II Clinical Trial for Dose Escalation and Safety Assessment and Clinical Response of Anti-SARS-CoV-2 Serum Produced by Instituto Butantan<br><a href="#">NCT04834089</a> | May 2022                           |
| <i>Other drugs</i>                                                                                                                                                               |                                    |
| <i>Corticosteroids</i>                                                                                                                                                           |                                    |
| ACTIV-6: COVID-19 Outpatient Randomized Trial to Evaluate Efficacy of Repurposed Medications<br><a href="#">NCT04885530</a>                                                      | March 2023                         |
| <i>Fluvoxamine</i>                                                                                                                                                               |                                    |
| Fluvoxamine for Early Treatment of Covid-19: a Fully-remote, Randomized Placebo Controlled Trial<br><a href="#">NCT04668950</a>                                                  | September 28, 2021                 |
| ACTIV-6: COVID-19 Outpatient Randomized Trial to Evaluate Efficacy of Repurposed Medications<br><a href="#">NCT04885530</a>                                                      | March 2023                         |

<sup>a</sup> As reported by the authors

*Abbreviations:* COVID 19= Coronavirus Infection; NCT=; NR= not reported; RT- PCR= Reverse transcription polymerase chain reaction; RCT= randomized controlled trial; SARS CoV2= severe acute respiratory syndrome coronavirus type 2.

## Supplement Table 5: Excluded Studies

### Ineligible Study Design (n=1)

1. Pere M-M, Arvind G, Andrea A, et al. Convalescent plasma for outpatients with early COVID-19. medRxiv. 2021.

### Ineligible Publication Type (n=112)

1. Abayomi A, Osibogun A, Ezechi O, Wright K, Ola B, Ojo O, et al. A multi-centre, randomized, double-blind, placebo-controlled clinical trial of the efficacy and safety of chloroquine phosphate, hydroxychloroquine sulphate and lopinavir/ritonavir for the treatment of COVID-19 in Lagos State: study protocol for a randomized controlled trial. *Trials*. 2021;22(1):869. doi: 10.1186/s13063-021-05675-x.
2. Asan Medical Center. Fluvoxamine for Adults With Mild to Moderate COVID-19: ClinicalTrials.gov; 2021 [03/30/2022]. Available from: <https://clinicaltrials.gov/ct2/show/NCT04711863>.
3. Ashraf S, Ashraf S, Farooq I, Ashraf S, Ashraf M, Imran MA, et al. Anti-COVID property of subcutaneous ivermectin in synergy with zinc among midlife moderately symptomatic patients: a structured summary of a study protocol for a randomised controlled trial. *Trials*. 2021;22(1):591. Epub 20210906. doi: 10.1186/s13063-021-05487-z. PubMed PMID: 34488858; PubMed Central PMCID: PMC8419386.
4. AstraZeneca. Phase III Study of AZD7442 for Treatment of COVID-19 in Outpatient Adults (TACKLE): ClinicalTrials.gov; 2021 [03/17/2022]. Available from: <https://clinicaltrials.gov/ct2/show/NCT04723394>.
5. Australia NT. A randomized double-blind placebo-controlled trial of oral ivermectin for outpatient treatment of those at high risk for hospitalization due to COVID-19: ANZCTR; 2020 [03/16/2022]. Available from: <https://anzctr.org.au/Trial/Registration/TrialReview.aspx?ACTRN=12620000982910>.
6. Ayudas Diagnosticas Sura S.A.S. Ivermectina Colombia (IVERCOL) (IVERCOL): ClinicalTrials.gov; 2021 [03/17/2022]. Available from: <https://clinicaltrials.gov/ct2/show/NCT04886362>.
7. Azidus Brasil. Efficacy and Safety of Nitazoxanide 600 mg to Treat Mild Ambulatory COVID-19 Patients: ClinicalTrials.gov; 2020 [03/16/2022]. Available from: <https://clinicaltrials.gov/ct2/show/NCT04441398>.
8. Barcelona Institute for Global Health. Hydroxychloroquine efficacy in preventing SARS-CoV-2 infection and CoVid-19 disease severity during pregnancy: EU Clinical Trials Register (EU CTR); 2020 [03/15/2022]. Available from: [https://www.clinicaltrialsregister.eu/ctr-search/search?query=eudract\\_number:2020-001587-29](https://www.clinicaltrialsregister.eu/ctr-search/search?query=eudract_number:2020-001587-29).
9. Biber A, Mandelboim M, Harmelin G, Lev D, Ram L, Shaham A, et al. Favorable outcome on viral load and culture viability using Ivermectin in early treatment of non-hospitalized patients with mild COVID-19 – A double-blind, randomized placebo-controlled trial 2021 [September, 5 2022]. 2021.05.31.21258081]. Available from: <http://medrxiv.org/content/early/2021/05/31/2021.05.31.21258081.abstract>.
10. Brown LK, Freemantle N, Breuer J, Dehbi HM, Chowdhury K, Jones G, et al. Early antiviral treatment in outpatients with COVID-19 (FLARE): a structured summary of a study protocol for a randomised controlled trial. *Trials*. 2021;22(1):193. Epub 20210308. doi: 10.1186/s13063-021-05139-2. PubMed PMID: 33685502; PubMed Central PMCID: PMC7938371.
11. Bulgarian Drug Agency. Multicenter, randomized, double-blind, placebo-controlled study investigating efficacy, safety and tolerability of ivermectin HUVE-19 in patients with proven SARS-CoV-2 infection (COVID-19) and manifested clinical symptoms: EU Clinical Trials Register



- (EU CTR); 2020 [03/15/2022]. Available from: <https://www.clinicaltrialsregister.eu/ctr-search/trial/2020-002091-12/BG>.
12. Butantan Institute. Clinical Trial for Assessment of Anti-SARS-CoV-2 Serum for Early Treatment of COVID-19 Cases: ClinicalTrials.gov; 2021 [03/16/2022]. Available from: <https://clinicaltrials.gov/ct2/show/NCT04834089>.
  13. Center for Primary Care and Public Health University of Lausanne Switzerland. #StayHome: Early Hydroxychloroquine to Reduce Secondary Hospitalisation and Household Transmission in COVID-19 (#StayHome): ClinicalTrials.gov; 2020 [03/16/2022]. Available from: <https://clinicaltrials.gov/ct2/show/NCT04385264>.
  14. Chaccour C, Ruiz-Castillo P, Richardson MA, Moncunill G, Casellas A, Carmona-Torre F, et al. The SARS-CoV-2 Ivermectin Navarra-ISGlobal Trial (SAINT) to Evaluate the Potential of Ivermectin to Reduce COVID-19 Transmission in low risk, non-severe COVID-19 patients in the first 48 hours after symptoms onset: A structured summary of a study protocol for a randomized control pilot trial. *Trials*. 2020;21(1):498. Epub 20200608. doi: 10.1186/s13063-020-04421-z. PubMed PMID: 32513289; PubMed Central PMCID: PMC7276958.
  15. Chemo Research S. L. A multicentre, phase III, double-blind, randomised, parallel, placebo-controlled trial to assess efficacy and safety of early administration of Ivermectin during 3 consecutive days to prevent SARS CoV-2 (COVID-19) hospitalisation in adults older than 50 years of age: EU Clinical Trials Register (EU CTR); 2021 [03/15/2022]. Available from: <https://www.clinicaltrialsregister.eu/ctr-search/trial/2020-005015-40/SK>.
  16. Clemency BM, Varughese R, Gonzalez-Rojas Y, Caryn GM, Wanda P, David JK, et al. A randomized controlled trial of inhaled ciclesonide for outpatient treatment of symptomatic COVID-19 infections 2021 [September 5, 2022]. Available from: <http://www.epistemikos.org/documents/0433c8a99511dab7bdc7a309c66a9e85d9938f2>  
<https://www.medrxiv.org/content/medrxiv/early/2021/09/12/2021.09.07.21261811.full.pdf>.
  17. Clinical Research Centre Malaysia. Ivermectin Treatment Efficacy in Covid-19 High Risk Patients: ClinicalTrials.gov; 2021 [03/16/2022]. Available from: <https://clinicaltrials.gov/ct2/show/NCT04920942>.
  18. Clinical Urology and Epidemiology Working Group. SOLIDARITY Finland Long COVID-19: ClinicalTrials.gov; 2021 [03/30/2022]. Available from: <https://clinicaltrials.gov/ct2/show/NCT04978259>.
  19. Coordinación de Investigación en Salud Mexico. Hidroxicloroquina With Azitromicina Versus Hidroxicloroquina and Placebo Int Patients With Mild COVID-19 (Omehecatl): ClinicalTrials.gov; 2021 [03/17/2022]. Available from: <https://clinicaltrials.gov/ct2/show/NCT04964583>.
  20. Corvus Pharmaceuticals Inc. CPI-006 Plus Standard of Care Versus Placebo Plus Standard of Care in Mild to Moderately Symptomatic Hospitalized Covid-19 Patients: ClinicalTrials.gov; 2021 [03/17/2022]. Available from: <https://clinicaltrials.gov/ct2/show/NCT04734873>.
  21. David ML, Li-An KB, Kashfia C, Stephanie D, Philip Y, Felicia I, et al. Favipiravir, lopinavir-ritonavir or combination therapy (FLARE): a randomised, double blind, 2x2 factorial placebo-controlled trial of early antiviral therapy in COVID-19 2022 [September, 5 2022]. Available from: <http://www.epistemikos.org/documents/039aa296d4c28329ba0584cfdb4ec58addeaf02>  
<https://www.medrxiv.org/content/medrxiv/early/2022/02/15/2022.02.11.22270775.full.pdf>.
  22. Dougan M, Azizad M, Chen P, Feldman B, Frieman M, Igbinador A, et al. Bebtelovimab, alone or together with bamlanivimab and etesevimab, as a broadly neutralizing monoclonal antibody treatment for mild to moderate, ambulatory COVID-19 2022 [September, 5 2022]. 2022.03.10.22272100]. Available from: <http://medrxiv.org/content/early/2022/03/12/2022.03.10.22272100.abstract>.
  23. Duvignaud A, Lhomme E, Pistone T, Onaisi R, Sitta R, Journot V, et al. Home Treatment of Older People with Symptomatic SARS-CoV-2 Infection (COVID-19): A structured Summary of a Study

- Protocol for a Multi-Arm Multi-Stage (MAMS) Randomized Trial to Evaluate the Efficacy and Tolerability of Several Experimental Treatments to Reduce the Risk of Hospitalisation or Death in outpatients aged 65 years or older (COVERAGE trial). *Trials*. 2020;21(1):846. doi: 10.1186/s13063-020-04619-1.
24. Erasmus Medical Center. Early Convalescent Plasma Therapy for High-risk Patients With COVID-19 in Primary Care (the CoV-Early Study): *clinicaltrials.gov*; 2020 [03/16/2022]. Available from: <https://clinicaltrials.gov/ct2/show/NCT04589949>.
  25. Farooq U. Effectiveness of Hydroxychloroquine in Covid-19 Patients (Covid): *ClinicalTrials.gov*; 2020 [03/16/2022]. Available from: <https://clinicaltrials.gov/ct2/show/NCT04328272>.
  26. Fawaz M, Raad H. In vivo use of ivermectin (IVR) for treatment for corona virus infected patients (COVID-19): a randomized controlled trial Chinese Clinical Trial Registry (ChiCTR); 2020 [02/10/2022]. Available from: <http://www.chictr.org.cn/showproj.aspx?proj=54707>.
  27. Fimea. Controlled clinical trial of hydroxychloroquine in the treatment of adult patients with Covid-19 infection in a primary care setting: EU Clinical Trials Register (EU CTR); 2020 [03/15/2022]. Available from: <https://www.clinicaltrialsregister.eu/ctr-search/trial/2020-002038-33/FI>.
  28. Fundació Assistencial Mútua Terrassa. Randomised clinical trial of ivermectin for treatment and prophylaxis of COVID-19: EU Clinical Trials Register (EU CTR); 2020 [03/15/2022]. Available from: [https://www.clinicaltrialsregister.eu/ctr-search/search?query=eudract\\_number:2020-001994-66](https://www.clinicaltrialsregister.eu/ctr-search/search?query=eudract_number:2020-001994-66).
  29. Garcia P, Hurtado H, Ugarte-Gil C, León P, Malaga G, Chaccour C, et al. Randomized Clinical Trial to Compare the Efficacy of Ivermectin Versus Placebo to Negativize Nasopharyngeal PCR in Patients with Early COVID-19 in Peru (SAINT-Peru): A Structured Summary of a Study Protocol for Randomized Controlled Trial. *ResearchSquare*. 2021. doi: 10.21203/rs.3.rs-345747/v1.
  30. Garcia PJ, Mundaca H, Ugarte-Gil C, Leon P, Malaga G, Chaccour C, et al. Randomized clinical trial to compare the efficacy of ivermectin versus placebo to negativize nasopharyngeal PCR in patients with early COVID-19 in Peru (SAINT-Peru): a structured summary of a study protocol for randomized controlled trial. *Trials*. 2021;22(1):262. Epub 2021/04/11. doi: 10.1186/s13063-021-05236-2. PubMed PMID: 33836826; PubMed Central PMCID: PMC8033091.
  31. Gilead Sciences. Study in Participants With Early Stage Coronavirus Disease 2019 (COVID-19) to Evaluate the Safety, Efficacy, and Pharmacokinetics of Remdesivir Administered by Inhalation: *ClinicalTrials.gov*; 2020 [03/17/2022]. Available from: <https://clinicaltrials.gov/ct2/show/NCT04539262>.
  32. González R, García-Otero L, Pons-Duran C, Marbán-Castro E, Goncé A, Llubra E, et al. Hydroxychloroquine efficacy and safety in preventing SARS-CoV-2 infection and COVID-19 disease severity during pregnancy (COVID-Preg): a structured summary of a study protocol for a randomised placebo controlled trial. *Trials*. 2020;21(1):607. Epub 20200702. doi: 10.1186/s13063-020-04557-y. PubMed PMID: 32616063; PubMed Central PMCID: PMC7330539.
  33. Göpel S, Bethge W, Martus P, Kreth F, Iftner T, Joos S, et al. Test and treat COVID 65 plus - Hydroxychloroquine versus placebo in early ambulatory diagnosis and treatment of older patients with COVID19: A structured summary of a study protocol for a randomised controlled trial. *Trials*. 2020;21(1):635. doi: 10.1186/S13063-020-04556-Z.
  34. Government of Punjab Specialized Healthcare and Medical Education Department. Post-Exposure Prophylaxis for Asymptomatic SARS-CoV-2 COVID-19 Patients With chloroquinE Compounds (PEACE): *ClinicalTrials.gov*; 2020 [03/16/2022]. Available from: <https://clinicaltrials.gov/ct2/show/NCT04346667>.
  35. Government of Punjab Specialized Healthcare and Medical Education Department. Prophylaxis of Exposed COVID-19 Individuals With Mild Symptoms Using chloroquinE Compounds

- (PRECISE): ClinicalTrials.gov; 2020 [03/16/2022]. Available from: <https://clinicaltrials.gov/ct2/show/NCT04351191>.
36. Griffiths GO, FitzGerald R, Jaki T, Corkhill A, Reynolds H, Ewings S, et al. AGILE: a seamless phase I/IIa platform for the rapid evaluation of candidates for COVID-19 treatment: an update to the structured summary of a study protocol for a randomised platform trial letter. *Trials*. 2021;22(1):487. Epub 2021/07/28. doi: 10.1186/s13063-021-05458-4. PubMed PMID: 34311777; PubMed Central PMCID: PMC8311065.
  37. Health Institutes of Turkey. Clinical Trial For Early SARS-CoV-2 (COVID-19) Treatment: ClinicalTrials.gov; 2021 [03/17/2022]. Available from: <https://clinicaltrials.gov/ct2/show/NCT04981379>.
  38. Heinrich-Heine University Duesseldorf. Reconvalescent Plasma/Camostat Mesylate Early in SARS-CoV-2 Q-PCR (COVID-19) Positive High-risk Individuals: ClinicalTrials.gov; 2021 [03/16/2022]. Available from: <https://clinicaltrials.gov/ct2/show/NCT04681430>.
  39. Hinks TSC, Barber VS, Black J, Dutton SJ, Jabeen M, Melhorn J, et al. A multi-centre open-label two-arm randomised superiority clinical trial of azithromycin versus usual care in ambulatory COVID-19: study protocol for the ATOMIC2 trial. *Trials*. 2020;21(1):718. doi: 10.1186/S13063-020-04593-8.
  40. Hospital Alemão Oswaldo Cruz. Randomized Placebo-controlled Trial of Hydroxychloroquine in Outpatient Cases With Coronavirus Disease 2019 (COVID-19): ClinicalTrials.gov; 2020 [03/16/2022]. Available from: <https://clinicaltrials.gov/ct2/show/NCT04466540>.
  41. Hospital Universitario Virgen de las Nieves. Pragmatic study "CORIVER": Ivermectin as antiviral treatment for patients infected by SARS-COV2 (COVID-19): EU Clinical Trials Register (EU CTR); 2020 [03/15/22]. Available from: <https://www.clinicaltrialsregister.eu/ctr-search/trial/2020-001971-33/ES>.
  42. International Centre for Diarrhoeal Disease Research Bangladesh. Efficacy and Safety of Ivermectin and Doxycycline in Combination or IVE Alone in Patients With COVID-19 Infection.: ClinicalTrials.gov; 2020 [03/15/2022]. Available from: <https://clinicaltrials.gov/ct2/show/NCT04407130>.
  43. Investigacion Biomedica para el Desarrollo de Farmacos S. A. de C. V. Efficacy, Safety and Tolerability of Ivermectin in Subjects Infected With SARS-CoV-2 With or Without Symptoms (SILVERBULLET): ClinicalTrials.gov; 2020 [03/16/2022]. Available from: <https://clinicaltrials.gov/ct2/show/NCT04407507>.
  44. IRCCS Sacro Cuore Don Calabria di Negrar. COVidIVERmectin: Ivermectin for Treatment of Covid-19 (COVER): ClinicalTrials.gov; 2020 [03/15/2022]. Available from: <https://clinicaltrials.gov/ct2/show/NCT04438850>.
  45. Istituto Nazionale per le Malattie Infettive. Adaptive Randomized trial for therapy of COReNa virus disease 2019 at home with oral antivirals: EU Clinical Trials Register (EU CTR); 2020 [03/30/2022]. Available from: <https://www.clinicaltrialsregister.eu/ctr-search/search?query=2020-001528-32>.
  46. Italian Medicines Agency. Adaptive, randomized, placebo-controlled trial to evaluate the efficacy of monoclonal antibodies in outpatients with mild or moderate COVID-19 (MANTICO): EU Clinical Trials Register (EU CTR); 2021 [03/17/2022]. Available from: <https://www.clinicaltrialsregister.eu/ctr-search/trial/2021-002612-31/IT>.
  47. Jewish General Hospital. Effect of Hydroxychloroquine in COVID-19 Positive Pregnant Women (HyPreC): ClinicalTrials.gov; 2020 [03/16/2022]. Available from: <https://clinicaltrials.gov/ct2/show/NCT04354441>.
  48. Kawai N. A Study of PF-07321332/Ritonavir in Non-hospitalized Low-Risk Adult Participants With COVID-19: JPRN; 2021 [03/16/2022]. Available from: <https://jrct.niph.go.jp/en-latest-detail/JRCT2031210274>.

49. Keitel V, Jensen B, Feldt T, Fischer JC, Bode JG, Matuschek C, et al. Reconvalescent plasma/camostat mesylate in early SARS-CoV-2 Q-PCR positive high-risk individuals (RES-Q-HR): a structured summary of a study protocol for a randomized controlled trial. *Trials*. 2021;22(1):343. Epub 2021/05/19. doi: 10.1186/s13063-021-05181-0. PubMed PMID: 34001215; PubMed Central PMCID: PMC8127198.
50. Keyhani S. VA Remote and Equitable Access to COVID-19 Healthcare Delivery (VA-REACH TRIAL): *ClinicalTrials.gov*; 2020 [03/16/2022]. Available from: <https://clinicaltrials.gov/ct2/show/NCT04363203>.
51. Keyhani S, Kelly JD, Bent S, Boscardin WJ, Shlipak MG, Leonard S, et al. A telehealth-based randomized controlled trial: A model for outpatient trials of off-label medications during the COVID-19 pandemic. *Clin Trials*. 2021;18(4):514-7. Epub 20210520. doi: 10.1177/17407745211011577. PubMed PMID: 34011199; PubMed Central PMCID: PMC8292190.
52. Kitasato University. Study in COvid-19 Patients With ivermectin (CORVETTE-01): *ClinicalTrials.gov*; 2020 [03/16/2022]. Available from: <https://clinicaltrials.gov/ct2/show/NCT04703205>.
53. Kowa Company Ltd. A Phase III Confirmatory Study of K-237: *ClinicalTrials.gov*; 2021 [03/17/2022]. Available from: <https://clinicaltrials.gov/ct2/show/NCT05056883>.
54. London School of Hygiene and Tropical Medicine. Prevention and Treatment for COVID -19 (Severe Acute Respiratory Syndrome Coronavirus 2 SARS-CoV-2) Associated Severe Pneumonia in the Gambia: *ClinicalTrials.gov*; 2021 [03/15/2022]. Available from: <https://clinicaltrials.gov/ct2/show/NCT04703608>.
55. Lopez AA. Pilot trial on early treatment with hydroxychloroquine in patients with COVID-19 who do not have hospital admission at diagnosis. Ensayo piloto sobre tratamiento precoz con hidroxiclороquina en pacientes con COVID-19 que no requieren ingreso hospitalario al diagnóstico: EU Clinical Trials Register; 2020 [03/16/2022]. Available from: <https://www.clinicaltrialsregister.eu/ctr-search/trial/2020-002449-41/ES>.
56. Lothar SA, Abassi M, Agostinis A, Bangdiwala AS, Cheng MP, Drobot G, et al. Post-exposure prophylaxis or pre-emptive therapy for severe acute respiratory syndrome coronavirus 2 (SARS-CoV-2): study protocol for a pragmatic randomized-controlled trial. *Canadian journal of anaesthesia = Journal canadien d'anesthesie*. 2020;67(9):1201-11. doi: 10.1007/s12630-020-01684-7.
57. Luo Z, Xiao W. Clinical study for Lopinavir and Ritonavir in the treatment of novel coronavirus pneumonia (COVID-19) Chinese Clinical Trial Registry (ChiCTR); 2020 [03/30/2022]. Available from: <https://www.chictr.org.cn/hvshowproject.aspx?id=23465>.
58. Mahidol University. A Double-blind Randomized Controlled Trial of Ivermectin With Favipiravir in Mild-to-moderate COVID-19 Patients (IFCOV): *ClinicalTrials.gov*; 2021 [03/17/2022]. Available from: <https://clinicaltrials.gov/ct2/show/NCT05155527>.
59. Max Health Subsero Health. An Outpatient Clinical Trial Using Ivermectin and Doxycycline in COVID-19 Positive Patients at High Risk to Prevent COVID-19 Related Hospitalization: *ClinicalTrials.gov*; 2021 [03/17/2022]. Available from: <https://clinicaltrials.gov/ct2/show/NCT04729140>.
60. Mazandaran University of Medical Sciences. Double-blind placebo-controlled clinical trial of evaluating the effectiveness of Ivermectin in treatment of outpatients with COVID-19 in 2021: Iranian Registry of Clinical Trials; 2020 [03/16/2022]. Available from: <https://www.irct.ir/trial/53949>.
61. McGill University Health Centre/Research Institute of the McGill University Health Centre. Preemptive Therapy for SARS-Coronavirus-2 (COVID-19 PEP Canada): *ClinicalTrials.gov*; 2020 [03/15/2022]. Available from: <https://clinicaltrials.gov/ct2/show/NCT04421664>.

62. Medical University of Vienna. Austrian CoronaVirus Adaptive Clinical Trial (COVID-19) (ACOVACT): ClinicalTrials.gov; 2020 [03/30/2022]. Available from: <https://clinicaltrials.gov/ct2/show/NCT04351724>.
63. Merck Sharp & Dohme LLC. Efficacy and Safety of Molnupiravir (MK-4482) in Non-Hospitalized Adult Participants With COVID-19 (MK-4482-002): clinicaltrials.gov; 2020 [03/16/2022]. Available from: <https://clinicaltrials.gov/ct2/show/NCT04575597>.
64. Mohan A, Tiwari P, Suri T, Mittal S, Patel A, Jain A, et al. Ivermectin in mild and moderate COVID-19 (RIVET-COV): a randomized, placebo-controlled trial 2021 [September, 5 2022]. Available from: <http://www.epistemonikos.org/documents/3429e55a1b440d02fb1c12eb4b24e3b900ba8f65> <https://assets.researchsquare.com/files/rs-191648/v1/26b2c005-bbec-4018-8c4c-401db1213ffc.pdf?c=1631872584>.
65. Naggie S. ACTIV-6: COVID-19 Study of Repurposed Medications: ClinicalTrials.gov; 2021 [03/17/2022]. Available from: <https://clinicaltrials.gov/ct2/show/NCT04885530>.
66. National Institute of Allergy and Infectious Diseases (NIAID). ACTIV-2: A Study for Outpatients With COVID-19: ClinicalTrials.gov; 2020 [03/17/2022]. Available from: <https://clinicaltrials.gov/ct2/show/NCT04518410>.
67. National Institute of Allergy and Infectious Diseases (NIAID). Evaluating the Efficacy of Hydroxychloroquine and Azithromycin to Prevent Hospitalization or Death in Persons With COVID-19: ClinicalTrials.gov; 2020 [03/16/2022]. Available from: <https://clinicaltrials.gov/ct2/show/NCT04358068>.
68. National Institute of Pharmacy Hungary. A randomized, double-blind, placebo-controlled study to assess the safety and efficacy of ivermectin in asymptomatic and mild severity COVID-19 patients: EU Clinical Trials Register (EU CTR); 2021 [03/15/2022]. Available from: <https://www.clinicaltrialsregister.eu/ctr-search/trial/2021-000166-15/HU>.
69. NGM Biopharmaceuticals Inc. A Phase 1/2 Study to Assess the Safety, Tolerability and Pharmacokinetics of NGM621 in Healthy Subjects, and to Assess the Safety, PK and Efficacy in Subjects With Moderate to Severe ARDS Caused by COVID-19: ClinicalTrials.gov; 2020 [03/17/2022]. Available from: <https://clinicaltrials.gov/ct2/show/NCT04582318>.
70. OHSU Knight Cancer Institute. Lopinavir/Ritonavir for the Treatment of COVID-19 Positive Patients With Cancer and Immune Suppression in the Last Year: ClinicalTrials.gov; 2020 [03/16/2022]. Available from: <https://clinicaltrials.gov/ct2/show/NCT04455958>.
71. Oliveira Junior HA, Ferri CP, Boszczowski I, Oliveira GBF, Cavalcanti AB, Rosa RG, et al. Rationale and Design of the COVID-19 Outpatient Prevention Evaluation (COPE - Coalition V) Randomized Clinical Trial: Hydroxychloroquine vs. Placebo in Non-Hospitalized Patients. *Arq Bras Cardiol.* 2022;118(2):378-87. doi: 10.36660/abc.20210832. PubMed PMID: 35262569; PubMed Central PMCID: PMC8856682.
72. Oregon Health and Science University. Assessing Hydroxychloroquine in Patients With SARS-CoV-2 (COVID-19): ClinicalTrials.gov; 2020 [03/16/2022]. Available from: <https://clinicaltrials.gov/ct2/show/NCT04363866>.
73. Raincy Montfermeil Hospital Group. Evaluation of the Impact of the Administration of Single Dose of Ivermectin in the Early Phase of COVID-19 (IVERCoV): ClinicalTrials.gov; 2021 [03/17/2022]. Available from: <https://clinicaltrials.gov/ct2/show/NCT05040724>.
74. Rambam Health Care Campus. Hydroxychloroquine for the Treatment of Patients With Mild to Moderate COVID-19 to Prevent Progression to Severe Infection or Death: ClinicalTrials.gov; 2020 [03/16/2022]. Available from: <https://clinicaltrials.gov/ct2/show/NCT04323631>.
75. Ravi A, Lydia G, Mary C, Matthew Craig H, Ian F, Sunita N, et al. Hydroxychloroquine for SARS-CoV-2 positive patients quarantined at home: The first interim analysis of a remotely conducted randomized clinical trial. *medRxiv.* 2021. doi: 10.1101/2021.02.22.21252228.

76. Regeneron Pharmaceuticals. A Study to Assess the Virologic Efficacy of REGN10933+REGN10987 Across Different Dose Regimens in Adult Outpatients With SARS-CoV-2 Infection: ClinicalTrials.gov; 2020 [03/16/2022]. Available from: <https://clinicaltrials.gov/ct2/show/NCT04666441>.
77. Romark Laboratories L. C. Trial to Evaluate Nitazoxanide for Treatment of Mild or Moderate COVID-19 in Subjects at High Risk of Severe Illness: ClinicalTrials.gov; 2022 [03/16/2022]. Available from: <https://clinicaltrials.gov/ct2/show/NCT05157243>.
78. Romark Laboratories L. C. Trial to Evaluate Nitazoxanide for Treatment of Mild COVID-19 in Subjects Not at High Risk of Severe Illness: ClinicalTrials.gov; 2022 [03/16/2022]. Available from: <https://clinicaltrials.gov/ct2/show/NCT05157269>.
79. Rutgers The State University of New Jersey. Asymptomatic COVID-19 Trial (ACT): ClinicalTrials.gov; 2020 [03/16/2022]. Available from: <https://clinicaltrials.gov/ct2/show/NCT04374552>.
80. Sanofi. Hydroxychloroquine in Outpatient Adults With COVID-19: ClinicalTrials.gov; 2020 [03/16/2022]. Available from: <https://clinicaltrials.gov/ct2/show/NCT04333654>.
81. Self WH, Stewart TG, Wheeler AP, El Atrouni W, Bistran-Hall AJ, Casey JD, et al. Passive Immunity Trial for Our Nation (PassITON): study protocol for a randomized placebo-control clinical trial evaluating COVID-19 convalescent plasma in hospitalized adults. *Trials*. 2021;22(1):221. Epub 2021/03/22. doi: 10.1186/s13063-021-05171-2. PubMed PMID: 33743799; PubMed Central PMCID: PMC7980732.
82. Sheba Medical Center. Ivermectin vs. Placebo for the Treatment of Patients With Mild to Moderate COVID-19: ClinicalTrials.gov; 2020 [03/16/2022]. Available from: <https://clinicaltrials.gov/ct2/show/NCT04429711>.
83. Shiraz University of Medical Sciences. Investigation of the Effectiveness of Ivermectin on Outpatient Treatment of Covid-19 Patients, Shiraz City, Southern Iran, 2020: A Randomized Controlled Trial Study (RCT): Iranian Registry of Clinical Trials; 2020 [03/16/2022]. Available from: <https://www.irct.ir/trial/54710>.
84. Silva M, Espejo A, L Pereyra M, Lynch M, Thompson M, Taconelli H, et al. Efficacy of Nitazoxanide in reducing the viral load in COVID-19 patients. Randomized, placebo-controlled, single-blinded, parallel group, pilot study 2021 [September, 5 2022]. 2021.03.03.21252509. Available from: <http://medrxiv.org/content/early/2021/03/05/2021.03.03.21252509.abstract>.
85. Sorrento Therapeutics Inc. Study to Evaluate a Single Dose of STI-2020 (COVI-AMG™) in Adults With Mild COVID-19 Symptoms: ClinicalTrials.gov; 2021 [03/17/2022]. Available from: <https://clinicaltrials.gov/ct2/show/NCT04734860>.
86. Sorrento Therapeutics Inc. Study to Evaluate the Safety and Efficacy of a Single Dose of STI-2020 (COVI-AMG™) to Treat COVID-19: ClinicalTrials.gov; 2021 [03/17/2022]. Available from: <https://clinicaltrials.gov/ct2/show/NCT04738175>.
87. Sorrento Therapeutics Inc. Randomized Study to Evaluate Intranasal Dose of STI-2099 (COVI-DROPS™) in Outpatient Adults With Mild COVID-19 Infection (US): ClinicalTrials.gov; 2021 [03/17/2022]. Available from: <https://clinicaltrials.gov/ct2/show/NCT05074394>.
88. Sylvain AL, Mahsa A, Alyssa A, Ananta SB, Matthew PC, Glen D, et al. Post-exposure Prophylaxis or Preemptive Therapy for SARS-Coronavirus-2: Study Protocol for a Pragmatic Randomized Controlled Trial. *medRxiv*. 2020. doi: 10.1101/2020.05.01.20087999.
89. Temple University. Outpatient Use of Ivermectin in COVID-19: ClinicalTrials.gov; 2020 [03/16/2022]. Available from: <https://clinicaltrials.gov/ct2/show/NCT04530474>.
90. Terada-Hirashima J, Suzuki M, Uemura Y, Hojo M, Mikami A, Sugiura W, et al. The RACCO Trial to Assess the Efficacy and Safety of Inhaled Ciclesonide for Asymptomatic and Mild Patients with Covid-19: A Study Protocol for a Multi-center, Open- labeled, Randomized Controlled Trial. *JMIR research protocols*. 2020;9(12):e23830. doi: 10.2196/23830.

91. The University of The West Indies. World Health Organization (WHO) COVID-19 Solidarity Trial for COVID-19 Treatments (SOLIDARITY): ClinicalTrials.gov; 2020 [03/30/2022]. Available from: <https://clinicaltrials.gov/ct2/show/NCT04647669>.
92. TrueBinding Inc. Study of TB006 in Outpatient Patients With Mild to Moderate COVID-19: ClinicalTrials.gov; 2021 [03/17/22]. Available from: <https://clinicaltrials.gov/ct2/show/NCT04801056>.
93. UMC Utrecht. Randomized, Embedded, Multifactorial Adaptive Platform Trial for Community-Acquired Pneumonia (REMAP-CAP): ClinicalTrials.gov; 2016 [03/30/2022]. Available from: <https://clinicaltrials.gov/ct2/show/NCT02735707>.
94. UnitedHealth Group. PATCH 2&3:Prevention & Treatment of COVID-19 (Severe Acute Respiratory Syndrome Coronavirus 2) With Hydroxychloroquine: ClinicalTrials.gov; 2020 [03/16/2022]. Available from: <https://clinicaltrials.gov/ct2/show/NCT04353037>.
95. Universidad Mayor de San Simón. Clinical Trial to "Study the Efficacy and Therapeutic Safety of Ivermectin: (SAINTBO) (SAINTBO): ClinicalTrials.gov; 2021 [03/17/2022]. Available from: <https://clinicaltrials.gov/ct2/show/NCT04836299>.
96. Universidad Nacional de Asunción. Efficacy of Ivermectin in Outpatients With Non-severe COVID-19: ClinicalTrials.gov; 2021 [03/17/2022]. Available from: <https://clinicaltrials.gov/ct2/show/NCT04834115>.
97. Universidad Peruana Cayetano Heredia. Randomized phase IIA clinical trial to compare the efficacy of Ivermectin versus Placebo to obtain negative PCR results in patients with early phase COVID-19: Clinical Trials Peruvian Registry (CTPR); 2020 [03/17/2022]. Available from: <https://www.ins.gob.pe/ensayosclinicos/rpec/recuperarECPBNuevoEN.asp?numec=034-20>.
98. Universidad Peruana Cayetano Heredia. Randomized Phase IIA Clinical Trial to Evaluate the Efficacy of Ivermectin to Obtain Negative PCR Results in Patients With Early Phase COVID-19: ClinicalTrials.gov; 2020 [03/16/2022]. Available from: <https://clinicaltrials.gov/ct2/show/NCT04635943>.
99. University Hospital Strasbourg. Efficacy of Hydroxychloroquine, Telmisartan and Azithromycin on the Survival of Hospitalized Elderly Patients With COVID-19 (COVID-Aging): ClinicalTrials.gov; 2020 [03/30/2022]. Available from: <https://clinicaltrials.gov/ct2/show/NCT04359953>.
100. University Hospital Tuebingen. Hydroxychloroquine for the Treatment of Mild COVID-19 Disease (COMIHY): ClinicalTrials.gov; 2020 [03/16/2022]. Available from: <https://clinicaltrials.gov/ct2/show/NCT04340544>.
101. University Hospital Tuebingen. Randomized controlled trial of hydroxychloroquine versus placebo in early ambulatory diagnosis and treatment of elderly COVID-19 Patients: EU Clinical Trials Register; 2020 [03/16/2022]. Available from: <https://www.clinicaltrialsregister.eu/ctr-search/trial/2020-001482-37/DE>.
102. University of Alberta. Corticosteroids for COVID-19: clinicaltrials.gov; 2021 [03/16/2022]. Available from: <https://clinicaltrials.gov/ct2/show/NCT04795583>.
103. University of Cape Town. Catalysing the Containment of COVID-19: ClinicalTrials.gov; 2020 [03/16/2022]. Available from: <https://clinicaltrials.gov/ct2/show/NCT04523090>.
104. University of Oxford. Finding Treatments for COVID-19: A Trial of Antiviral Pharmacodynamics in Early Symptomatic COVID-19 (PLATCOV) (PLATCOV): ClinicalTrials.gov; 2021 [03/30/2022]. Available from: <https://clinicaltrials.gov/ct2/show/NCT05041907>.
105. University of South Alabama. Trial of Hydroxychloroquine In Covid-19 Kinetics (THICK): ClinicalTrials.gov; 2020 [03/16/2022]. Available from: <https://clinicaltrials.gov/ct2/show/NCT04353271>.
106. University of Utah. University of Utah COVID-19 Hydrochloroquine Trial. clinicaltrials.gov. 2020.
107. Vainio PJ, Hietasalo P, Koivisto AL, Kääriäinen S, Turunen J, Virtala M, et al. Hydroxychloroquine in the treatment of adult patients with Covid-19 infection in a primary care setting (LIBERTY): A

- structured summary of a study protocol for a randomised controlled trial. *Trials*. 2021;22(1):44. doi: 10.1186/s13063-020-04989-6.
108. Vanderbilt University Medical Center. Trial of Early Therapies During Non-hospitalized Outpatient Window for COVID-19 (TREATNOW): ClinicalTrials.gov; 2020 [03/16/2022]. Available from: <https://clinicaltrials.gov/ct2/show/NCT04372628>.
  109. Wag Y, Zhao J. A randomized, open-label study to evaluate the efficacy and safety of Lopinavir-Ritonavir in patients with mild novel coronavirus pneumonia (COVID-19): Chinese Clinical Trial Registry (ChiCTR); 2020 [03/30/2022]. Available from: <http://www.chictr.org.cn/showprojen.aspx?proj=48991>.
  110. Washington University School of Medicine. Fluvoxamine for Early Treatment of Covid-19: a Fully-remote, Randomized Placebo Controlled Trial (Stop Covid 2): ClinicalTrials.gov; 2020 [03/16/2022]. Available from: <https://clinicaltrials.gov/ct2/show/NCT04668950>.
  111. Wijewickrama A. A randomized control trial to assess the efficacy and safety of ivermectin in the treatment of mild to moderate COVID 19 patients: SLCTR; 2021 [03/16/2022]. Available from: <https://slctr.lk/trials/slctr-2021-020>.
  112. Zhao J, Wag Y. A randomized, open-label study to evaluate the efficacy and safety of Lopinavir-Ritonavir in patients with mild novel coronavirus pneumonia (COVID-19): Chinese Clinical Trial Registry; 2020 [03/16/2022]. Available from: <http://www.chictr.org.cn/showprojen.aspx?proj=48991>.

### Ineligible Population (n=34)

1. 1. Anan M, Kitisak P, Sujaree P, Swangjit S, Jakravoot M, Wiroj R, et al. Efficacy and safety of ivermectin in the treatment of mild-to-moderate COVID-19 infection: A randomized, double blind, placebo, controlled trial. *Research Square*. 2022. doi: 10.21203/rs.3.rs-1290999/v1.
2. AstraZeneca. Phase III Double-blind, Placebo-controlled Study of AZD7442 for Post- Exposure Prophylaxis of COVID-19 in Adults: clinicaltrials.gov; 2020 [03/16/2022]. Available from: <https://clinicaltrials.gov/ct2/show/NCT04625972>.
3. AstraZeneca. Phase I Double-blind, Placebo-controlled Study of AZD7442: clinicaltrials.gov; 2021 [03/16/2022]. Available from: <https://clinicaltrials.gov/ct2/show/NCT04896541>.
4. Azidus Brasil. Efficacy and Safety of Nitazoxanide 600 mg BID Versus Placebo for the Treatment of Hospitalized Patients With COVID-19: ClinicalTrials.gov; 2020 [03/17/2022]. Available from: <https://clinicaltrials.gov/ct2/show/NCT04423861>.
5. Barnabas RV, Brown E, Bershteyn A, Miller RS, Wener M, Celum C, et al. Efficacy of hydroxychloroquine for post-exposure prophylaxis to prevent severe acute respiratory syndrome coronavirus 2 (SARS-CoV-2) infection among adults exposed to coronavirus disease (COVID-19): a structured summary of a study protocol for a randomised controlled trial. *Trials*. 2020;21(1):475. doi: 10.1186/s13063-020-04446-4.
6. Bihariesingh-Sanchit R. Effect of convalescent plasma in early course of COVID-19 disease: ISRCTN registry; 2021 [03/17/2022]. Available from: <https://www.isrctn.com/ISRCTN49832318>.
7. Capital Medical University. A Trial of Remdesivir in Adults With Mild and Moderate COVID-19: ClinicalTrials.gov; 2020 [03/16/2022]. Available from: <https://clinicaltrials.gov/ct2/show/NCT04252664>.
8. Derya University. Post COVID-19 Anosmia treatments: UMIN Clinical Trials Registry; 2021 [03/16/2022]. Available from: [https://center6.umin.ac.jp/cgi-open-bin/ctr\\_e/ctr\\_view.cgi?recptno=R000049715](https://center6.umin.ac.jp/cgi-open-bin/ctr_e/ctr_view.cgi?recptno=R000049715).
9. Dubée V, Roy PM, Vielle B, Parot-Schinkel E, Blanchet O, Darsonval A, et al. Hydroxychloroquine in mild-to-moderate coronavirus disease 2019: a placebo-controlled double blind trial. *Clinical*



- microbiology and infection : the official publication of the European Society of Clinical Microbiology and Infectious Diseases. 2021;27(8):1124-30. doi: 10.1016/j.cmi.2021.03.005.
10. Eli L. A Study of LY3819253 (LY-CoV555) in Participants Hospitalized for COVID-19: ClinicalTrials.gov; 2020 [03/16/2022]. Available from: <https://clinicaltrials.gov/ct2/show/NCT04411628>.
  11. EU Clinical Trials Register (EU CTR). A SINGLE-BLINDED RANDOMIZED, PLACEBO-CONTROLLED PHASE II TRIAL OF PROPHYLACTIC TREATMENT WITH ORAL AZITHROMYCIN VERSUS PLACEBO IN CANCER PATIENTS UNDERGOING ANTINEOPLASTIC TREATMENT DURING THE COVID-19 PANDEMIC 2020 [03/30/2022]. Available from: <https://www.clinicaltrialsregister.eu/ctr-search/trial/2020-001327-13/AT>.
  12. Federal Research Clinical Center of Federal Medical and Biological Agency Russia. Hyperimmune Convalescent Plasma in Moderate and Severe COVID-19 Disease: ClinicalTrials.gov; 2020 [03/16/2022]. Available from: <https://clinicaltrials.gov/ct2/show/NCT04392414>.
  13. Fundação de Medicina Tropical Dr. Heitor Vieira Dourado. Chloroquine Diphosphate in the Prevention of SARS in Covid-19 Infection (CloroCOVID19II): ClinicalTrials.gov; 2020 [03/16/2022]. Available from: <https://clinicaltrials.gov/ct2/show/NCT04342650>.
  14. Health Institutes of Turkey. Clinical Trial For Early SARS-CoV-2 (COVID-19) Treatment: ClinicalTrials.gov; 2020 [03/16/2022]. Available from: <https://clinicaltrials.gov/ct2/show/NCT04981379>.
  15. Imunek's Farma ilac San. Tic. A. S. A Study To Evaluate The Efficacy And Safety Of a Novel Niclosamide Suspension Formulation For COVID-19 (NICLONEX): ClinicalTrials.gov; 2020 [03/17/2022]. Available from: <https://clinicaltrials.gov/ct2/show/NCT04558021>.
  16. Kriti R. Ivermectin as a potential treatment for COVID 19: A double blind randomized placebo-controlled trial: Clinical Trials Registry - India (CTRI); 2020 [03/15/2022]. Available from: <http://www.ctri.nic.in/Clinicaltrials/pmaindet2.php?trialid=46660>.
  17. Li Y, Xie Z, Lin W, Cai W, Wen C, Guan Y, et al. Efficacy and Safety of Lopinavir/Ritonavir or Arbidol in Adult Patients with Mild/Moderate COVID-19: An Exploratory Randomized Controlled Trial. *Med (N Y)*. 2020;1(1):105-13.e4. Epub 2020/05/19. doi: 10.1016/j.medj.2020.04.001. PubMed PMID: 32838353.
  18. Lofgren SM, Nicol MR, Bangdiwala AS, Pastick KA, Okafor EC, Skipper CP, et al. Safety of Hydroxychloroquine Among Outpatient Clinical Trial Participants for COVID-19. *Open forum infectious diseases*. 2020;7(11):ofaa500. doi: 10.1093/OFID/OFAA500.
  19. NYU Langone Health. Treating COVID-19 With Hydroxychloroquine (TEACH): ClinicalTrials.gov; 2020 [03/16/2022]. Available from: <https://clinicaltrials.gov/ct2/show/NCT04369742>.
  20. Pfizer Inc. A phase 2/3, randomized, double-blind, double-dummy, placebo controlled study to evaluate the safety and efficacy of 2 regimens of orally administered PF-07321332/Ritonavir in preventing symptomatic SARS-COV-2 infection in adult household contacts of individuals with SARS-COV-2 infection: EU Clinical Trials Register; 2021 [03/16/2022]. Available from: <https://www.clinicaltrialsregister.eu/ctr-search/trial/2021-002894-24/ES>.
  21. Preusser M. A single-blinded randomized, placebo-controlled phase II trial of prophylactic treatment with oral azithromycin versus placebo in cancer patients undergoing antineoplastic treatment during the COVID-19 pandemic EU Clinical Trials Register (EU CTR); 2020 [03/10/2022]. Available from: <https://www.clinicaltrialsregister.eu/ctr-search/trial/2020-001327-13/AT>.
  22. Ravi Shankar PS, Sima ST, Frances H, Phylinda LC, Rohit R, Richard A, et al. Innovative Randomized Phase 1 Study and Dosing Regimen Selection to Accelerate and Inform Pivotal COVID-19 Trial of Nirmatrelvir. *medRxiv*. 2022. doi: 10.1101/2022.02.08.22270649.
  23. Romark Laboratories L.C. Trial to Evaluate the Efficacy and Safety of Nitazoxanide (NTZ) for Post-Exposure Prophylaxis of COVID-19 and Other Viral Respiratory Illnesses in Elderly Residents of

- Long-Term Care Facilities (LTCF): ClinicalTrials.gov; 2020 [03/16/2022]. Available from: <https://clinicaltrials.gov/ct2/show/NCT04343248>.
24. Shahid Beheshti University of Medical Sciences. Evolution of the efficacy and safety of Dexamethasone administration in patients with mild to moderate COVID-19 acute respiratory disease syndrome: Iranian Registry of Clinical Trials; 2020 [03/16/2022]. Available from: <http://www.epistemontos.org/documents/37f1c55e3dff2bcf7ec2513441fcd74df45b4c5>.
  25. SigmaDrugs Research Ltd. A randomized, double-blind, placebo-controlled, adaptive-design study to assess the safety and efficacy of daily 200 mg fluvoxamine as add-on therapy to standard of care in moderate severity COVID-19 patients: EU Clinical Trials Register (EU CTR); 2020 [03/30/2022]. Available from: <https://www.clinicaltrialsregister.eu/ctr-search/trial/2020-002299-11/HU>.
  26. SigmaDrugs Research Ltd. Fluvoxamine Administration in Moderate SARS-CoV-2 (COVID-19) Infected Patients: ClinicalTrials.gov; 2021 [03/30/2022]. Available from: <https://clinicaltrials.gov/ct2/show/NCT04718480>.
  27. Skipper CP, Pastick KA, Engen NW, Bangdiwala AS, Abassi M, Lofgren SM, et al. Hydroxychloroquine in Nonhospitalized Adults With Early COVID-19: A Randomized Trial. *Annals of internal medicine*. 2020;173(8):623-31. doi: 10.7326/M20-4207.
  28. South African National Blood Service. Therapeutic Use of Convalescent Plasma in the Treatment of Patients With Moderate to Severe COVID-19: ClinicalTrials.gov; 2020 [03/16/2022]. Available from: <https://clinicaltrials.gov/ct2/show/NCT04516811>.
  29. Spinner CD, Gottlieb RL, Criner GJ, Arribas López JR, Cattelan AM, Soriano Viladomiu A, et al. Effect of Remdesivir vs Standard Care on Clinical Status at 11 Days in Patients With Moderate COVID-19: A Randomized Clinical Trial. *JAMA*. 2020;324(11):1048-57. doi: 10.1001/jama.2020.16349.
  30. University Hospital Tuebingen. Hydroxychloroquine for COVID-19: ClinicalTrials.gov; 2020 [03/16/2022]. Available from: <https://clinicaltrials.gov/ct2/show/NCT04342221>.
  31. University of Malaga. Prevention of COVID19 Infection in Nursing Homes by Chemoprophylaxis With Hydroxychloroquine (PREVICHARM): ClinicalTrials.gov; 2020 [03/16/2022]. Available from: <https://clinicaltrials.gov/ct2/show/NCT04400019>.
  32. Varnaseri M. Evaluating the efficacy and safety of Ivermectin in the treatment of COVID-19 patients: A double-blind randomized controlled trial, phase II Iranian Registry of Clinical Trials (IRCT); 2020 [03/15/2022]. Available from: <https://en.irct.ir/trial/49935>.
  33. WellStar Health System. Hydroxychloroquine Use in Hospitalized Patients With COVID-19: Impact on Progression to Severe or Critical Disease: ClinicalTrials.gov; 2020 [03/16/2022]. Available from: <https://clinicaltrials.gov/ct2/show/NCT04429867>.
  34. Wijewickrama A. Efficacy and safety of oral ivermectin in the treatment of COVID-19 patients: A randomized double-blind controlled clinical trial: Sri Lanka Clinical Trials Registry (SLCTR); 2021 [03/17/2022]. Available from: <https://slctr.lk/trials/slctr-2021-020>.

### Ineligible Intervention (n=13)

1. Adagio Therapeutics Inc. Evaluation of ADG20 for the Treatment of Mild or Moderate COVID-19 (STAMP). 2021. Accessed at ClinicalTrials.gov at <https://clinicaltrials.gov/ct2/show/NCT04805671> on 03/17/2022.
2. Assiut University. Ivermectin Versus Standard Treatment in Mild COVID-19. 2021. Accessed at ClinicalTrials.gov at <https://clinicaltrials.gov/ct2/show/NCT04937569> on 03/16/2022.
3. Azienda Ospedaliera Universitaria Integrata Verona. Adaptive, randomized, placebo-controlled trial to evaluate the efficacy of monoclonal antibodies in outpatients with mild or moderate COVID-19 (MANTICO) Studio clinico adattativo, randoMizzato, controllato con placebo, sull'uso

- di ANTicorpi monoclonali nei pazienti affetti da forma lieve-moderata di Covid-19 (MANTICO). 2021. Accessed at EU Clinical Trials Register at <https://www.clinicaltrialsregister.eu/ctr-search/trial/2021-002612-31/IT> on 03/16/2022.
4. Celltrion. To Evaluate the Safety and Efficacy of Inhaled CT-P63 and CT-P66 Combination Therapy in Patients With Mild to Moderate COVID-19. 2022. Accessed at ClinicalTrials.gov at <https://clinicaltrials.gov/ct2/show/NCT05224856> on 03/17/2022.
  5. Centre Hospitalier Universitaire de Bordeaux. Home treatment of elderly patients with symptomatic SARS-CoV-2 infection (COVID-19): a multiarm, multi-stage (MAMS) randomized trial to assess the efficacy and safety of several experimental treatments to reduce the risk of hospitalization or death. 2020. Accessed at EU Clinical Trials Register (EU CTR) at [https://www.clinicaltrialsregister.eu/ctr-search/search?query=eudract\\_number:2020-001435-27](https://www.clinicaltrialsregister.eu/ctr-search/search?query=eudract_number:2020-001435-27) on 03/15/22.
  6. Jones MH. Vaccine Plasma for the Treatment of COVID-19 Infection. 2022. Accessed at Brazilian Registry of Clinical Trials (ReBEC) at <https://ensaiosclinicos.gov.br/rg/RBR-2ggx7sm> on 03/17/2022.
  7. Moreira TG, Matos KTF, De Paula GS, et al. Nasal Administration of Anti-CD3 Monoclonal Antibody (Foralumab) Reduces Lung Inflammation and Blood Inflammatory Biomarkers in Mild to Moderate COVID-19 Patients: A Pilot Study. *Frontiers in immunology*. 2021;12:709861.
  8. Shanghai Junshi Bioscience Co Ltd. JS016 (Anti-SARS-CoV-2 Monoclonal Antibody) With Mild and Moderate COVID-19 or SARS-CoV-2 Asymptomatic Infection Subects. 2021. Accessed at ClinicalTrials.gov at <https://clinicaltrials.gov/ct2/show/NCT04780321> on 03/17/2022.
  9. Sinocelltech Ltd. To Evaluate SCTA01 Treatment of High-risk Outpatients With COVID-19 (MAOP3). 2021. Accessed at ClinicalTrials.gov at <https://clinicaltrials.gov/ct2/show/NCT04709328> on 03/17/2022.
  10. Sorrento Therapeutics Inc. Study to Evaluate a Single Intranasal Dose of STI-2099 (COVI-DROPS™) in Outpatient Adults With COVID-19 (UK). 2021. Accessed at ClinicalTrials.gov at <https://clinicaltrials.gov/ct2/show/NCT04900428> on 03/17/2022.
  11. St. Francis Hospital New York. Hydroxychloroquine, Azithromycin and Zinc for the Treatment of COVID-19 in the Outpatient Setting. 2020. Accessed at ClinicalTrials.gov at <https://clinicaltrials.gov/ct2/show/NCT04621461> on 03/16/2022.
  12. United Medical Specialties. Study to Evaluate the Efficacy of COVID19-0001-USR in Patients With Mild/or Moderate COVID-19 Infection in Outpatient (COVID-19). 2020. Accessed at ClinicalTrials.gov at <https://clinicaltrials.gov/ct2/show/NCT04595136> on 03/17/2022.
  13. Wang S, Tong Z. A Randomized Controlled Trial for Favipiravir Tablets Combine With Chloroquine Phosphate in the Treatment of Novel Coronavirus Pneumonia (COVID-19) 2020. Accessed at Chinese Clinical Trial Registry (ChiCTR) at <http://www.chictr.org.cn/showproj.aspx?proj=51329> on 03/10/2022.

### Ineligible Comparison (n=30)

1. Aijaz Zeeshan Khan C, Khurshid Ahmad K, Mohsin A, et al. Effectiveness of Ivermectin in SARS-CoV-2/COVID-19 Patients. *International journal of sciences*. 2020;9(9):31-5.
2. Alaa Rashad M, Nafady A, Hassan M, et al. Therapeutic efficacy of macrolides in management of patients with mild COVID-19. *Scientific Reports*. 2021.
3. ASUR Marche. Hydroxychloroquine sulfate early administration in symptomatic out of hospital COVID-19 positive patients. Hydro-Stop-COVID19 Trial Utilizzo precoce a domicilio di Idrossiclorochina solfato in pazienti affetti da COVID 19. Hydro-STOP-COVID19 Trial. 2020. Accessed at EU Clinical Trials Register at <https://www.clinicaltrialsregister.eu/ctr-search/trial/2020-001558-23/IT> on 03/16/2022.

4. AXIS Clinicals Ltd. Study to evaluate the efficacy and safety of Molnupiravir capsules Compare with the with Standard of Care Medications Care alone in patients who are suffering with Moderate COVID-19 disease. 2021. Accessed at CTRI at <http://www.ctri.nic.in/Clinicaltrials/pmaindet2.php?trialid=58743> on 03/16/2022.
5. B. D. R. Pharmaceuticals Internationals Pvt Ltd. A Phase II/III Clinical Trial to understand the efficacy and safety of Molnupiravir 800mg in the treatment of patients diagnosed with moderate COVID-19. 2021. Accessed at CTRI at <http://www.ctri.nic.in/Clinicaltrials/pmaindet2.php?trialid=56466> on 03/16/2022.
6. B. D. R. Pharmaceuticals Internationals Pvt Ltd. A Phase III Clinical Trial to understand the efficacy and safety of Molnupiravir 800mg in the treatment of patients diagnosed with mild COVID-19. 2021. Accessed at CTRI at <http://www.ctri.nic.in/Clinicaltrials/pmaindet2.php?trialid=56281> on 03/16/2022.
7. Babalola OE, Bode CO, Ajayi AA, et al. Ivermectin shows clinical benefits in mild to moderate COVID19: A randomised controlled double blind dose response study in Lagos. medRxiv. 2021:2021.01.05.21249131.
8. Centre Hospitalier Universitaire Amiens. Proactive Care of Ambulatory COVID19 Patients (AMBU-COVID). 2020. Accessed at ClinicalTrials.gov at <https://clinicaltrials.gov/ct2/show/NCT04371107> on 03/30/2022.
9. Chahla R, Ruiz L, Mena T, et al. Cluster Randomised Trials - Ivermectin Repurposing For COVID-19 Treatment Of Outpatients With Mild Disease In Primary Health Care Centers. ResearchSquare. 2021.
10. Dr Reddys Laboratories Limited. This study is to evaluate benefit of adding Molnupiravir over standard treatments in mild COVID-19 subjects. 2021. Accessed at CTRI at <http://www.ctri.nic.in/Clinicaltrials/pmaindet2.php?trialid=56374>.
11. Dra Ana Pueyo B. Outpatient treatment of COVID-19 with early pulmonary corticosteroids as an opportunity to modify the course of the disease; Tratamiento ambulatorio de COVID-19 con corticoides en fase de neumonía leve sin necesidad de ingreso como oportunidad de modificar el curso de la enfermedad. 2020. Accessed at EU Clinical Trials Register at <https://www.clinicaltrialsregister.eu/ctr-search/trial/2020-001622-64/ES> on 03/16/2022.
12. Duvignaud A, Lhomme E, Onaisi R, et al. Inhaled ciclesonide for outpatient treatment of COVID-19 in adults at risk of adverse outcomes: a randomised controlled trial (COVERAGE). Clinical microbiology and infection: the official publication of the European Society of Clinical Microbiology and Infectious Diseases. 2022.
13. Erasmus Medical Center. Early Convalescent Plasma Therapy for High-risk Patients With COVID-19 in Primary Care (the CoV-Early Study) (CoV-Early). 2020. Accessed at ClinicalTrials.gov at <https://clinicaltrials.gov/ct2/show/NCT04589949> on 03/17/2022.
14. F. M. H. College of Medicine and Dentistry. Effectiveness of Ivermectin in SARS-CoV-2/COVID-19 Patients. 2020. Accessed at clinicaltrials.gov at <https://clinicaltrials.gov/ct2/show/NCT04739410> on 03/16/2022.
15. Hinks TSC, Cureton L, Knight R, et al. Azithromycin versus standard care in patients with mild-to-moderate COVID-19 (ATOMIC2): an open-label, randomised trial. The Lancet Respiratory Medicine. 2021;9(10):1130-40.
16. Indian Council Of Medical Research. Study to assess the efficacy and safety of convalescent plasma in moderate COVID-19 disease. 2020. Accessed at CTRI at <http://www.ctri.nic.in/Clinicaltrials/pmaindet2.php?trialid=43149>.
17. Johnston C, Brown ER, Stewart J, et al. Hydroxychloroquine with or without azithromycin for treatment of early SARS-CoV-2 infection among high-risk outpatient adults: A randomized clinical trial. EClinicalMedicine. 2021;33:100773.

18. Khoo SH, Fitzgerald R, Fletcher T, et al. Optimal dose and safety of molnupiravir in patients with early SARS-CoV-2: a Phase I, open-label, dose-escalating, randomized controlled study. *The Journal of antimicrobial chemotherapy*. 2021;76(12):3286-95.
19. Koera University Guro Hospital. A Trial of Ciclesonide in Adults with Mild COVID-19. 2020. Accessed at CRIS at [https://cris.nih.go.kr/cris/search/detailSearch.do?seq=16795&search\\_page=L&search\\_lang=E&lang=E&latest=Y](https://cris.nih.go.kr/cris/search/detailSearch.do?seq=16795&search_page=L&search_lang=E&lang=E&latest=Y).
20. Lady Hardinge Medical College. A clinical Trial to Study the Effects of Hydroxychloroquine, Ciclesonide and Ivermectin in treatment of moderate COVID-19 illness. 2020. Accessed at CTRI at <http://www.ctri.nic.in/Clinicaltrials/pmaindet2.php?trialid=43364> on 03/16/2022.
21. M. S. N. Laboratories Private Limited. To Evaluate the Efficacy and Safety of Molnupiravir Capsule in Treatment of Subjects with Mild Corona virus Disease (COVID-19). 2021. Accessed at CTRI at <http://www.ctri.nic.in/Clinicaltrials/pmaindet2.php?trialid=56239> on 03/16/2022.
22. Metro Infectious Disease Consultants. Evaluating the Efficacy of Convalescent Plasma in Symptomatic Outpatients Infected With COVID-19. 2020. Accessed at clinicaltrials.gov at <https://clinicaltrials.gov/ct2/show/NCT04438057> on 03/16/2022.
23. Optimus Pharma Pvt Ltd. A clinical study to estimate the efficacy and safety of formulation of Molnupiravir in patients with Mild COVID-19 infection. 2021. Accessed at CTRI at <http://www.ctri.nic.in/Clinicaltrials/pmaindet2.php?trialid=56393> on 03/16/2022.
24. Oriol M, Marc C, Camila GB, et al. Hydroxychloroquine Alone or in Combination with Cobicistat-Boosted Darunavir for Treatment of Mild COVID-19: A Cluster-Randomized Clinical Trial. SSRN. 2020.
25. Sanjay R, Dan VN, Beverly L, et al. Inhaled Budesonide in the Treatment of Early COVID-19 Illness: A Randomised Controlled Trial. SSRN. 2021.
26. Song J-Y, Yoon J-G, Seo Y-B, et al. Ciclesonide Inhaler Treatment for Mild-to-Moderate COVID-19: A Randomized, Open-Label, Phase 2 Trial. *Journal of Clinical Medicine*. 2021;10(16):3545.
27. Strides Pharma Science Limited. A Clinical Study with Molnupiravir Capsules 800mg in COVID-19 Patients with Mild symptoms. 2021. Accessed at CTRI at <http://www.ctri.nic.in/Clinicaltrials/pmaindet2.php?trialid=56699> on 03/16/2022.
28. Tanta University. Remdesivir Efficacy in Coronavirus Disease. 2020. Accessed at ClinicalTrials.gov at <https://clinicaltrials.gov/ct2/show/NCT04345419> on 03/30/2022.
29. The University of The West Indies. WHO COVID-19 Solidarity Trial for COVID-19 Treatments. 2020. Accessed at clinicaltrials.gov at <https://clinicaltrials.gov/ct2/show/NCT04647669> on 03/16/2022.
30. University of Oxford Clinical Trials and Research Governance. Use of inhaled corticosteroids as treatment of early COVID-19 infection to prevent clinical deterioration and hospitalisation. 2020. Accessed at EU Clinical Trials Register at <https://www.clinicaltrialsregister.eu/ctr-search/trial/2020-001889-10/GB>.

### Ineligible Outcome (n=4)

1. Chang XL, Wu HL, Webb GM, et al. CCR5 Receptor Occupancy Analysis Reveals Increased Peripheral Blood CCR5+CD4+ T Cells Following Treatment With the Anti-CCR5 Antibody Leronlimab. *Front Immunol*. 2021;12:794638.
2. Esfahan University of Medical Sciences. Study the effect of Steroid on the outpatient treatment Covid-19 patients. 2020. Accessed at Iranian Registry of Clinical Trials at <https://www.irct.ir/trial/52709>.
3. Kitasato University. Study in COvid-19 Patients With iveRmectin (CORVETTE-01). 2021. Accessed at ClinicalTrials.gov at <https://clinicaltrials.gov/ct2/show/NCT04703205> on 03/17/2022.

4. South Valley University. Role of Ivermectin Nanosuspension as Nasal Spray in Treatment of Persistent Post covid19 Anosmia. 2021. Accessed at ClinicalTrials.gov at <https://clinicaltrials.gov/ct2/show/NCT04951362> on 03/17/2022.

### Fulltext Unretrievable (n=3)

1. Joy John M, Snehil K, Lovely T, et al. Assessing of the Factors Associated with Mortality Among the Patients of PLACID Trial (A Phase II, Open Label, Randomized Controlled Trial to Assess the Safety and Efficacy of Convalescent Plasma to Limit COVID-19 Associated Complications in Moderate Disease). SSRN. 2021.
2. Sudhakar Koudinya T, Dr. Subhra L, Rama Raju D, et al. Efficacy and Safety of Molnupiravir for the Treatment of Non-Hospitalized Adults With Mild COVID-19: A Randomized, Open-Label, Parallel-Group Phase 3 Trial. SSRN. 2022.
3. Sugiyama H. A multicenter, open-label, randomized controlled trial to evaluate the efficacy and safety of inhaled ciclesonide for asymptomatic and mild patients with COVID-19. JPRN. 2020.

### Ineligible Setting (n=12)

1. Ahangar N. Study of Ivermectin Effectiveness in treatment process, survival and cure rate of COVID-19 patients: a randomized clinical trial 2021. Accessed at Iranian Registry of Clinical Trials (IRCT) at <https://en.irct.ir/trial/55216> on 03/15/2022.
2. Ahmed S, Karim MM, Ross AG, et al. A five day course of ivermectin for the treatment of COVID-19 may reduce the duration of illness. International Journal of Infectious Diseases. 2021;103:214-6.
3. Blum VF, Cimerman S, Hunter JR, et al. Nitazoxanide superiority to placebo to treat moderate COVID-19 - A Pilot prove of concept randomized double-blind clinical trial. EClinicalMedicine. 2021;37:100981.
4. Dubée V, Roy P-M, Vielle B, et al. A placebo-controlled double blind trial of hydroxychloroquine in mild-to-moderate COVID-19. medRxiv. 2020:2020.10.19.20214940.
5. Heber S, Pereyra D, Schrottmaier WC, et al. A Model Predicting Mortality of Hospitalized Covid-19 Patients Four Days After Admission: Development, Internal and Temporal-External Validation. Front Cell Infect Microbiol. 2021;11:795026.
6. Khan K. Administration of Anti-SARS-CoV-2 Convalescent Plasma in Hospitalized, Non-ICU Patients With COVID-19. 2020. Accessed at ClinicalTrials.gov at <https://clinicaltrials.gov/ct2/show/NCT04467151> on 03/17/2022.
7. Lim SCL, Hor CP, Tay KH, et al. Efficacy of Ivermectin Treatment on Disease Progression Among Adults With Mild to Moderate COVID-19 and Comorbidities: The I-TECH Randomized Clinical Trial. JAMA internal medicine. 2022.
8. Niaee M, Gheibi N, Namdar P, et al. Ivermectin as an adjunct treatment for hospitalized adult COVID-19 patients: A randomized multi-center clinical trial; 2020.
9. Ortigoza MB, Yoon H, Goldfeld KS, et al. Efficacy and Safety of COVID-19 Convalescent Plasma in Hospitalized Patients: A Randomized Clinical Trial. JAMA Internal Medicine. 2022;182(2):115-26.
10. Ravi K, Ranjini R, Chandrima P, et al. Ivermectin as a potential treatment for mild to moderate COVID-19: A double blind randomized placebo-controlled trial. medRxiv. 2021.
11. Ridgeback Biotherapeutics LP. The Safety of Molnupiravir (EIDD-2801) and Its Effect on Viral Shedding of SARS-CoV-2 (END-COVID). 2020. Accessed at ClinicalTrials.gov at <https://clinicaltrials.gov/ct2/show/NCT04405739> on 03/15/2022.
12. Universidade Federal do Rio de Janeiro. Nitazoxanide Therapy for Patients With COVID-19 Pneumonia. 2020. Accessed at ClinicalTrials.gov at <https://clinicaltrials.gov/ct2/show/NCT04561219> on 03/17/2022.

**Supplement Table 6: Study Characteristics of Included Studies**

| Author, Year, Trial Name, Trial Registry No. Funding Risk of bias                                                                             | Design, Country, Duration (days) Dominant variant at time of study (%)*      | Eligibility criteria                                                                                                                                                                                                                   | N total (randomized), Interventions, N group                                                                                        | Population                                                                                                                                                                                                    | Baseline characteristics                                                                                                                                                                                                                                                                                                                                                       | Recovery, symptom duration, all-cause mortality, COVID-19 specific mortality, Hospitalization due to COVID-19 (n/N (%))                                                                                                                                                                                                                        | Incidence of any adverse events, incidence of serious adverse events (n/N (%))                                                                   |
|-----------------------------------------------------------------------------------------------------------------------------------------------|------------------------------------------------------------------------------|----------------------------------------------------------------------------------------------------------------------------------------------------------------------------------------------------------------------------------------|-------------------------------------------------------------------------------------------------------------------------------------|---------------------------------------------------------------------------------------------------------------------------------------------------------------------------------------------------------------|--------------------------------------------------------------------------------------------------------------------------------------------------------------------------------------------------------------------------------------------------------------------------------------------------------------------------------------------------------------------------------|------------------------------------------------------------------------------------------------------------------------------------------------------------------------------------------------------------------------------------------------------------------------------------------------------------------------------------------------|--------------------------------------------------------------------------------------------------------------------------------------------------|
| <b>Antiviral drugs</b>                                                                                                                        |                                                                              |                                                                                                                                                                                                                                        |                                                                                                                                     |                                                                                                                                                                                                               |                                                                                                                                                                                                                                                                                                                                                                                |                                                                                                                                                                                                                                                                                                                                                |                                                                                                                                                  |
| Lopinavir/Ritonavir                                                                                                                           |                                                                              |                                                                                                                                                                                                                                        |                                                                                                                                     |                                                                                                                                                                                                               |                                                                                                                                                                                                                                                                                                                                                                                |                                                                                                                                                                                                                                                                                                                                                |                                                                                                                                                  |
| Reis et al. 2021 (30)<br><br>TOGETHER<br><br>NCT04403100<br><br>Academic Foundation/non-profit professional organization<br><br>Some concerns | RCT (double-blinded),<br><br>Brazil<br><br>90<br><br>P.1 variant (gamma): NR | COVID-19 vaccine received: NR<br><br>Previous SARS-CoV-2 infection: NR<br><br>Presence and/or duration of symptoms: less than 8 days since onset of flulike symptoms<br><br>Disease severity: mild<br><br>Pregnant women: Not eligible | N=471<br><br>G1: 244<br>Lopinavir 1600 mg/Ritonavir 400 at day 1, Lopinavir 800 mg/Ritonavir 200 mg after<br><br>G2: 227<br>Placebo | Age, years, mean (SD):<br>median (range)<br>G1: 54 (18-94)<br>G2: 53 (18-80)<br><br>female (%):<br>G1: 55<br>G2: 53<br><br>Ethnicity (%):<br>Non-white:<br>G1: 97<br>G2: 96<br><br>Diagnostic tool:<br>RT-PCR | Proportion of symptomatic participants (%):<br>G1: 100<br>G2: 100<br><br>Duration of symptoms:<br>NR<br><br>Proportion of participants with previous infections:<br>NR<br><br>Time (days) since previous infection:<br>NR<br><br>Proportion of vaccinated participants:<br>NR<br><br>Disease severity (%):<br>Mild:<br>G1: 100<br>G2: 100<br><br>Currently pregnant (%):<br>NA | Recovery <sup>†</sup><br>NR<br><br>Symptom duration (time until symptom free):<br>NR<br><br>All-cause mortality:<br>At 90 days:<br>G1: 2/244 (1)<br>G2: 1/227 (0.4)<br>p=NR<br><br>COVID-19 specific mortality:<br>NR<br><br>Hospitalization due to COVID-19:<br>At 90 days<br>G1: 14/244 (6)<br>G2: 11/227 (5)<br>HR (95%CI) 1.16 (0.53-2.56) | Any AE:<br>At 90 days<br>G1: 92/232 (40)<br>G2: 46/220 (21)<br>p=NR<br><br>Serious AE:<br>At 90 days<br>G1: 20/232 (9)<br>G2: 12/220 (6)<br>p=NR |
| Molnupiravir                                                                                                                                  |                                                                              |                                                                                                                                                                                                                                        |                                                                                                                                     |                                                                                                                                                                                                               |                                                                                                                                                                                                                                                                                                                                                                                |                                                                                                                                                                                                                                                                                                                                                |                                                                                                                                                  |

| Author, Year, Trial Name, Trial Registry No. Funding Risk of bias          | Design, Country, Duration (days) Dominant variant at time of study (%)*                                                                                                                                                                                                                       | Eligibility criteria                                                                                                                                                                                                                                                    | N total (randomized), Interventions, N group                   | Population                                                                                                                                                                                           | Baseline characteristics                                                                                                                                                                                                                                                                                                                                                                                                                                                                                                                                                                        | Recovery, symptom duration, all-cause mortality, COVID-19 specific mortality, Hospitalization due to COVID-19 (n/N (%))                                                                                                                                                                                                                                                                                                                                           | Incidence of any adverse events, incidence of serious adverse events (n/N (%))                                                                                                                                              |
|----------------------------------------------------------------------------|-----------------------------------------------------------------------------------------------------------------------------------------------------------------------------------------------------------------------------------------------------------------------------------------------|-------------------------------------------------------------------------------------------------------------------------------------------------------------------------------------------------------------------------------------------------------------------------|----------------------------------------------------------------|------------------------------------------------------------------------------------------------------------------------------------------------------------------------------------------------------|-------------------------------------------------------------------------------------------------------------------------------------------------------------------------------------------------------------------------------------------------------------------------------------------------------------------------------------------------------------------------------------------------------------------------------------------------------------------------------------------------------------------------------------------------------------------------------------------------|-------------------------------------------------------------------------------------------------------------------------------------------------------------------------------------------------------------------------------------------------------------------------------------------------------------------------------------------------------------------------------------------------------------------------------------------------------------------|-----------------------------------------------------------------------------------------------------------------------------------------------------------------------------------------------------------------------------|
| Jayk Bernal et al. 2022 (33)<br>MOVE-OUT<br>NCT04575597<br>Industry<br>Low | RCT (double-blinded),<br>US, Argentina, Brazil, Canada, Chile, Colombia, Egypt, France, Germany, Guatemala, Italy, Japan, Mexico, Philippines, Russia, South Africa, Spain, Taiwan, Ukraine, UK<br>29<br>B.1.617.2 variant (delta): 58<br>B.1.621 variant (mu): 21<br>P.1 variant (gamma): 11 | COVID-19 vaccine received: Not eligible<br>Previous SARS-CoV-2 infection: NR<br>Presence and/or duration of symptoms: at least one sign or symptom of Covid-19 within 5 days before randomization<br>Disease severity: mild or moderate<br>Pregnant women: Not eligible | N=1,433<br>G1: 716<br>Molnupiravir 800mg<br>G2: 717<br>Placebo | Age, years, median (range):<br>G1: 42.0 (18–90)<br>G2: 44.0 (18–88)<br><br>female (%):<br>G1: 54<br>G2: 49<br><br>Ethnicity (%):<br>Non-white:<br>G1: 44<br>G2: 43<br><br>Diagnostic tool:<br>RT-PCR | Proportion of symptomatic participants (%):<br>G1: 100<br>G2: 100<br><br>Duration of symptoms (Time from onset of Covid-19 signs or symptoms to randomization of ≤3 days – no. (%):<br>G1: 48<br>G2: 48<br><br>Proportion of participants with previous infections (%):<br>NR<br><br>Time (days) since previous infection:<br>NR<br><br>Proportion of vaccinated participants:<br>NA<br><br>Disease severity (%):<br>Mild<br>Overall: 55<br>G1: 55<br>G2: 54<br>Moderate<br>Overall: 45<br>G1: 44<br>G2: 45<br>Severe or unknown<br>Overall: 1<br>G1: 1<br>G2: 1<br><br>Currently pregnant (%): | Recovery <sup>†</sup> :<br>At 29 days:<br>G1: 312/645 (48)<br>G2: 314/650 (48)<br>OR 1.04 (95% CI 0.84 to 1.29)<br><br>Symptom duration (time until symptom free):<br>NR<br><br>All-cause mortality:<br>At 29 days:<br>G1: 1/709 (0.1)<br>G2: 9/699 (1)<br>p=NR<br><br>COVID-19 specific mortality:<br>At 29 days:<br>G1: 1/709 (0.1)<br>G2: 9/699 (1)<br>p=NR<br><br>Hospitalization due to COVID-19:<br>At 29 days:<br>G1: 45/709 (6)<br>G2: 64/699 (9)<br>p=NR | Any AE:<br>At 29 days:<br>G1: 216/710 (30)<br>G2: 231/701 (33)<br>difference (95% CI) –2.5% (–7.4 to 2.3)<br><br>Serious AE:<br>At 29 days:<br>G1: 49/710 (7)<br>G2: 67/701 (10)<br>difference (95% CI) –2.7% (–5.6 to 0.2) |



| Author, Year, Trial Name, Trial Registry No. Funding Risk of bias | Design, Country, Duration (days) Dominant variant at time of study (%)*              | Eligibility criteria                                                                                                                                                                                                                                                     | N total (randomized), Interventions, N group                                                                   | Population                                                                                                                                                                                                                                                                          | Baseline characteristics                                                                                                                                                                                                                                                                                                                                                                                                                                                                           | Recovery, symptom duration, all-cause mortality, COVID-19 specific mortality, Hospitalization due to COVID-19 (n/N (%))                                                                                                                                                                                                                                      | Incidence of any adverse events, incidence of serious adverse events (n/N (%))                                                                                                                                   |
|-------------------------------------------------------------------|--------------------------------------------------------------------------------------|--------------------------------------------------------------------------------------------------------------------------------------------------------------------------------------------------------------------------------------------------------------------------|----------------------------------------------------------------------------------------------------------------|-------------------------------------------------------------------------------------------------------------------------------------------------------------------------------------------------------------------------------------------------------------------------------------|----------------------------------------------------------------------------------------------------------------------------------------------------------------------------------------------------------------------------------------------------------------------------------------------------------------------------------------------------------------------------------------------------------------------------------------------------------------------------------------------------|--------------------------------------------------------------------------------------------------------------------------------------------------------------------------------------------------------------------------------------------------------------------------------------------------------------------------------------------------------------|------------------------------------------------------------------------------------------------------------------------------------------------------------------------------------------------------------------|
|                                                                   |                                                                                      |                                                                                                                                                                                                                                                                          |                                                                                                                |                                                                                                                                                                                                                                                                                     | NA                                                                                                                                                                                                                                                                                                                                                                                                                                                                                                 |                                                                                                                                                                                                                                                                                                                                                              |                                                                                                                                                                                                                  |
| Fischer et al. 2022 (31)<br>NA<br>NCT04405570<br>Industry<br>Low  | RCT (double-blinded),<br>U.S.,<br>28<br>B.1.1.7 (alpha): NR<br>B.1.617.2 (delta): NR | COVID-19 vaccine received: Not eligible<br><br>Previous SARS-CoV-2 infection: NR<br><br>Presence and/or duration of symptoms: at least one SARS-CoV-2 infection symptom within 7 days before study begin<br><br>Disease severity: NR<br><br>Pregnant women: Not eligible | N=204<br>G1: 23 Molnupiravir 200mg<br>G2: 62 Molnupiravir 400mg<br>G3: 55 Molnupiravir 800mg<br>G4: 62 Placebo | Age, years median (range):<br>G1: 32.0 (19-65)<br>G2: 42.5 (19-82)<br>G3: 42.0 (18-68)<br>G4: 39.0 (19-71)<br><br>female (%):<br>G1: 48<br>G2: 52<br>G3: 49<br>G4: 55<br><br>Ethnicity (%):<br>Non-white:<br>G1: 26<br>G2: 10<br>G3: 11<br>G4: 13<br><br>Diagnostic tool:<br>RT-PCR | Proportion of symptomatic participants (%):<br>G1: 100<br>G2: 100<br>G3: 100<br>G4: 100<br><br>Duration of symptoms:<br>At baseline (median (range)):<br>G1: 4.00 (1.8–7.0)<br>G2: 4.85 (2.5–7.1)<br>G3: 4.60 (1.4–7.1)<br>G4: 4.55 (1.8–7.5)<br><br>Proportion of participants with previous infections (%):<br>NR<br><br>Time (days) since previous infection:<br>NR<br><br>Proportion of vaccinated participants:<br>NA<br><br>Disease severity (%):<br>NR<br><br>Currently pregnant (%):<br>NA | Recovery <sup>†</sup> :<br>NR<br><br>Symptom duration (time until symptom free):<br>Median (95% CI)<br>G1: 9.0 days (6.0 to 13.0)<br>G2: 5.5 days (4.0 to 8.0)<br>G3: 8.0 days (6.0 to 12.0)<br>G4: 8.5 days (7.0 to 11.0)<br>p=NR<br><br>All-cause mortality:<br>NR<br><br>COVID-19 specific mortality:<br>NR<br><br>Hospitalization due to COVID-19:<br>NR | Any AE:<br>At 28 days:<br>G1: 11/23 (48)<br>G2: 20/62 (32)<br>G3: 11/55 (20)<br>G4: 18/62 (29)<br>p=NR<br><br>Serious AE:<br>At 28 days:<br>G1: 0/23 (0)<br>G2: 2/62 (3)<br>G3: 1/55 (2)<br>G4: 1/62 (2)<br>p=NR |
| Nirmatrelvir/Ritonavir                                            |                                                                                      |                                                                                                                                                                                                                                                                          |                                                                                                                |                                                                                                                                                                                                                                                                                     |                                                                                                                                                                                                                                                                                                                                                                                                                                                                                                    |                                                                                                                                                                                                                                                                                                                                                              |                                                                                                                                                                                                                  |

| Author, Year, Trial Name, Trial Registry No. Funding Risk of bias          | Design, Country, Duration (days) Dominant variant at time of study (%)*                                                                                                                                                                                                             | Eligibility criteria                                                                                                                                                                                                                                                                                                 | N total (randomized), Interventions, N group                                      | Population                                                                                                                                                                                                                | Baseline characteristics                                                                                                                                                                                                                                                                                                                                               | Recovery, symptom duration, all-cause mortality, COVID-19 specific mortality, Hospitalization due to COVID-19 (n/N (%))                                                                                                                                                                                                                                                      | Incidence of any adverse events, incidence of serious adverse events (n/N (%))                                                                           |
|----------------------------------------------------------------------------|-------------------------------------------------------------------------------------------------------------------------------------------------------------------------------------------------------------------------------------------------------------------------------------|----------------------------------------------------------------------------------------------------------------------------------------------------------------------------------------------------------------------------------------------------------------------------------------------------------------------|-----------------------------------------------------------------------------------|---------------------------------------------------------------------------------------------------------------------------------------------------------------------------------------------------------------------------|------------------------------------------------------------------------------------------------------------------------------------------------------------------------------------------------------------------------------------------------------------------------------------------------------------------------------------------------------------------------|------------------------------------------------------------------------------------------------------------------------------------------------------------------------------------------------------------------------------------------------------------------------------------------------------------------------------------------------------------------------------|----------------------------------------------------------------------------------------------------------------------------------------------------------|
| Hammond et al. 2022 (35)<br>NA<br>NCT04960202<br>Industry<br>Some concerns | RCT (double-blinded),<br>US, Bulgaria, South Africa, Brazil, India, Mexico, Ukraine, Turkey, Japan, Spain, Russia, Argentina, Colombia, Poland, South Korea, Hungary, Taiwan, Malaysia, Czech Republic, Thailand, Puerto Rico<br>28<br>B.1.1.7 (alpha): NR<br>B.1.617.2 (delta): NR | COVID-19 vaccine received: Not eligible<br>Previous SARS-CoV-2 infection: not eligible<br>Presence and/or duration of symptoms: at least one sign or symptom of Covid-19 on the day of randomization; symptom onset no more than 5 days before randomization<br>Disease severity: NR<br>Pregnant women: Not eligible | N=2,246<br>G1: 1,120<br>Nirmatrelvir 600mg/ritonavir 200mg<br>G2: 1126<br>Placebo | Age, years, mean (SD):<br>Median (range)<br>G1: 45.0 (18.0–86.0)<br>G2: 46.5 (18.0–88.0)<br><br>female (%):<br>G1: 50<br>G2: 48<br><br>Ethnicity (%):<br>Non-white:<br>G1: 29<br>G2: 28<br><br>Diagnostic tool:<br>RT-PCR | Proportion of symptomatic participants (%):<br>G1: 100<br>G2: 100<br><br>Duration of symptoms:<br>G1: 3 (1)<br>G2: 3 (1)<br><br>Proportion of participants with previous infections: NA<br><br>Time (days) since previous infection:<br>NA<br><br>Proportion of vaccinated participants:<br>NA<br><br>Disease severity (%):<br>NR<br><br>Currently pregnant (%):<br>NA | Recovery <sup>†</sup> :<br>NR<br><br>Symptom duration (time until symptom free):<br>NR<br><br>All-cause mortality:<br>At 28 days:<br>G1: 0/1039 (0)<br>G2: 12/1046 (1)<br>p=NR<br><br>COVID-19 specific mortality:<br>NR<br><br>Hospitalization due to COVID-19:<br>At 28 days:<br>G1: 8/1039 (1)<br>G2: 65/1046 (6)<br>Difference (SE) –5.62% (0.81) 95% CI –7.21 to –4.03) | Any AE:<br>At 34 days:<br>G1: 251/1109 (23)<br>G2: 266/1115 (24)<br>p=NR<br><br>Serious AE:<br>At 34 days:<br>G1: 18/1109 (2)<br>G2: 74/1115 (7)<br>p=NR |
| Remdesivir                                                                 |                                                                                                                                                                                                                                                                                     |                                                                                                                                                                                                                                                                                                                      |                                                                                   |                                                                                                                                                                                                                           |                                                                                                                                                                                                                                                                                                                                                                        |                                                                                                                                                                                                                                                                                                                                                                              |                                                                                                                                                          |

| Author, Year, Trial Name, Trial Registry No. Funding Risk of bias                                                    | Design, Country, Duration (days) Dominant variant at time of study (%)*                                         | Eligibility criteria                                                                                                                                                                                                                                                                                                                                                                                      | N total (randomized), Interventions, N group                                                         | Population                                                                                                                                                                            | Baseline characteristics                                                                                                                                                                                                                                                                                                                                                                                  | Recovery, symptom duration, all-cause mortality, COVID-19 specific mortality, Hospitalization due to COVID-19 (n/N (%))                                                                                                                                                                                                                                                                                      | Incidence of any adverse events, incidence of serious adverse events (n/N (%))                                                                       |
|----------------------------------------------------------------------------------------------------------------------|-----------------------------------------------------------------------------------------------------------------|-----------------------------------------------------------------------------------------------------------------------------------------------------------------------------------------------------------------------------------------------------------------------------------------------------------------------------------------------------------------------------------------------------------|------------------------------------------------------------------------------------------------------|---------------------------------------------------------------------------------------------------------------------------------------------------------------------------------------|-----------------------------------------------------------------------------------------------------------------------------------------------------------------------------------------------------------------------------------------------------------------------------------------------------------------------------------------------------------------------------------------------------------|--------------------------------------------------------------------------------------------------------------------------------------------------------------------------------------------------------------------------------------------------------------------------------------------------------------------------------------------------------------------------------------------------------------|------------------------------------------------------------------------------------------------------------------------------------------------------|
| Gottlieb et al. 2021 (44)<br><br>NCT04501952;<br>EudraCT number, 2020-003510-12<br><br>Industry<br><br>Some concerns | RCT (double-blinded),<br>US, Denmark, Spain, UK<br><br>28<br><br>B B.1.1.7 (alpha): NR<br>B.1.617.2 (delta): NR | COVID-19 vaccine received:<br>Not eligible<br><br>Previous SARS-CoV-2 infection:<br>not eligible if required prior hospitalization for COVID-19 or treatment<br><br>Presence and/or duration of symptoms: at least one ongoing symptom consistent with Covid-19, with onset of the first symptom within 7 days before randomization<br><br>Disease severity:<br>NR<br><br>Pregnant women:<br>Not eligible | N=584<br><br>G1: 292<br>Remdesivir 200 mg on day 1, 100 mg on days 2 and 3<br><br>G2: 292<br>Placebo | Age, years, mean (SD):<br>G1: 50 (15)<br>G2: 51 (15)<br><br>female (%):<br>G1: 47<br>G2: 49<br><br>Ethnicity (%):<br>Non-white:<br>G1: 21<br>G2: 18<br><br>Diagnostic tool:<br>RT-PCR | Proportion of symptomatic participants (%):<br>G1: 100<br>G2: 100<br><br>Duration of symptoms:<br>Median time (IQR) - days<br>G1: 5 (3–6)<br>G2: 5 (4–6)<br><br>Proportion of participants with previous infections:<br>NR<br><br>Time (days) since previous infection:<br>NR<br><br>Proportion of vaccinated participants:<br>NA<br><br>Disease severity (%):<br>NR<br><br>Currently pregnant (%):<br>NA | Recovery <sup>†</sup> :<br>G1: 61/169 (36)<br>G2: 33/165 (20)<br>Rate Ratio 1.92 (95% CI 1.26-2.94)<br><br>Symptom duration (time until symptom free):<br>NR<br><br>All-cause mortality:<br>At 28 days:<br>G1: 0/279 (0)<br>G2: 0/283 (0)<br><br>COVID-19 specific mortality:<br>NR<br><br>Hospitalization due to COVID-19:<br>At 28 days:<br>G1: 2/279 (1)<br>G2: 15/283 (5)<br>HR 0.13 (95% CI 0.003-0.59) | Any AE:<br>At 28 days:<br>G1: 118 /279 (42)<br>G2: 131/283 (46)<br>p=NR<br><br>Serious AE:<br>At 28 days:<br>G1: 5/279 (2)<br>G2: 19/283 (7)<br>p=NR |
| <b><i>Monoclonal antibodies</i></b>                                                                                  |                                                                                                                 |                                                                                                                                                                                                                                                                                                                                                                                                           |                                                                                                      |                                                                                                                                                                                       |                                                                                                                                                                                                                                                                                                                                                                                                           |                                                                                                                                                                                                                                                                                                                                                                                                              |                                                                                                                                                      |
| Casirivimab/Imdevimab                                                                                                |                                                                                                                 |                                                                                                                                                                                                                                                                                                                                                                                                           |                                                                                                      |                                                                                                                                                                                       |                                                                                                                                                                                                                                                                                                                                                                                                           |                                                                                                                                                                                                                                                                                                                                                                                                              |                                                                                                                                                      |

| Author, Year, Trial Name, Trial Registry No. Funding Risk of bias                                                                                                                                                                                                     | Design, Country, Duration (days) Dominant variant at time of study (%)*                        | Eligibility criteria                                                                                                                                                                                                                                                                 | N total (randomized), Interventions, N group                                                                                                                                                                                                                      | Population                                                                                                                                                                                                                                                                                                                                                                  | Baseline characteristics                                                                                                                                                                                                                                                                                                                                                                                                                                                                   | Recovery, symptom duration, all-cause mortality, COVID-19 specific mortality, Hospitalization due to COVID-19 (n/N (%))                                                                                                                                                                                                                                                                                                                                                                                                             | Incidence of any adverse events, incidence of serious adverse events (n/N (%))                                                                                                                                                       |
|-----------------------------------------------------------------------------------------------------------------------------------------------------------------------------------------------------------------------------------------------------------------------|------------------------------------------------------------------------------------------------|--------------------------------------------------------------------------------------------------------------------------------------------------------------------------------------------------------------------------------------------------------------------------------------|-------------------------------------------------------------------------------------------------------------------------------------------------------------------------------------------------------------------------------------------------------------------|-----------------------------------------------------------------------------------------------------------------------------------------------------------------------------------------------------------------------------------------------------------------------------------------------------------------------------------------------------------------------------|--------------------------------------------------------------------------------------------------------------------------------------------------------------------------------------------------------------------------------------------------------------------------------------------------------------------------------------------------------------------------------------------------------------------------------------------------------------------------------------------|-------------------------------------------------------------------------------------------------------------------------------------------------------------------------------------------------------------------------------------------------------------------------------------------------------------------------------------------------------------------------------------------------------------------------------------------------------------------------------------------------------------------------------------|--------------------------------------------------------------------------------------------------------------------------------------------------------------------------------------------------------------------------------------|
| Weinreich et al. 2021 (25)<br><br>Safety, Tolerability, and Efficacy of Anti-Spike (S) SARS-CoV-2 Monoclonal Antibodies for the Treatment of Ambulatory Adult and Pediatric Patients With COVID-19<br><br>NCT04425629<br><br>Government Industry<br><br>Some concerns | RCT (double-blinded), US, Mexico<br><br>29<br><br>B.1.1.7 (alpha): NR<br>B.1.617.2 (delta): NR | COVID-19 vaccine received: Not eligible<br><br>Previous SARS-CoV-2 infection: NR<br><br>Presence and/or duration of symptoms: the onset of any Covid-19 symptom, occurring no more than 7 days before randomization,<br><br>Disease severity: NR<br><br>Pregnant women: Not eligible | N=5,607 (1040 excluded after randomization; safety population n=5,531)<br><br>G1: 1,529 Casirivimab/imdevimab 2400 mg<br><br>G2: 838 Casirivimab/imdevimab 1200 mg<br><br>G3: 700 Casirivimab/imdevimab 8000 mg<br><br>G4: 840 Placebo<br><br>G5: 1,500 Placebo** | Age, years:<br>At least 1 risk factor:<br>Median (IQR)<br>G1: 50.0 (39.0–60.0)<br>G2: 48.5 (37.0–57.5)<br>G3: 51.0 (40.0–59.0)<br>G4: 48.0 (35.0–57.0)<br>G5: 50.0 (37.0–58.0)<br><br>female (%):<br>G1: 52<br>G2: 53<br>G3: 48<br>G4: 50<br>G5: 53<br><br>Ethnicity (%):<br>Non-white:<br>G1: 14<br>G2: 19<br>G3: 15<br>G4: 18<br>G5: 15<br><br>Diagnostic tool:<br>RT-PCR | Proportion of symptomatic participants (%):<br>G1: 100<br>G2: 100<br>G3: 100<br>G4: 100<br>G5: 100<br><br>Duration of symptoms:<br>Median (IQR)<br>G1: 3.0 (2–5)<br>G2: 3.0 (2–5)<br>G3: 3.0 (2–5)<br>G4: 3.0 (2–4)<br>G5: 3.0 (2–5)<br><br>Proportion of participants with previous infections (%):<br>NR<br><br>Time (days) since previous infection:<br>NR<br><br>Proportion of vaccinated participants (%): NA<br><br>Disease severity (%):<br>NR<br><br>Currently pregnant (%):<br>NA | Recovery <sup>†</sup> :<br>NR<br><br>Symptom duration (time until symptom free):<br>At 29 days:<br>Median days<br>G1: 10<br>G2: 10<br>G3: NR<br>G4: NR<br>G5: 14<br>p< 0.001<br><br>All-cause mortality:<br>At 29 days:<br>G1: 1/1355 (<0.1)<br>G2: 1/736 (0.1)<br>G3: 0/625 (0)<br>G4: 1/748 (0.1)<br>G5: 3/1341 (0.2)<br>p=NR<br><br>COVID-19 specific mortality:<br>NR<br><br>Hospitalization due to COVID-19:<br>At 29 days:<br>G1: 17/1355 (1)<br>G2: 6/736 (1)<br>G3: 13/625 (2)<br>G4: 23/748 (3)<br>G5: 59/1341 (4)<br>p=NR | Any AE:<br>At 45 days:<br>G1: 142/1849 (8)<br>G2: 59/827 (7)<br>G3: 85/1012 (8)<br>G4: NR<br>G5: 189/1843 (10)<br><br>Serious AE:<br>At 45 days:<br>G1: 24/1849 (1)<br>G2: 9/827 (1)<br>G3: 17/1012 (2)<br>G4: NR<br>G5: 74/1843 (4) |

| Author, Year, Trial Name, Trial Registry No. Funding Risk of bias                              | Design, Country, Duration (days) Dominant variant at time of study (%)*                                       | Eligibility criteria                                                                                                                                                                                                                                                                                                                 | N total (randomized), Interventions, N group                                                                                            | Population                                                                                                                                                                                                                                                                       | Baseline characteristics                                                                                                                                                                                                                                                                                                                                                                                                                                                                                    | Recovery, symptom duration, all-cause mortality, COVID-19 specific mortality, Hospitalization due to COVID-19 (n/N (%))                                                                                                                                                            | Incidence of any adverse events, incidence of serious adverse events (n/N (%))                                                                                                               |
|------------------------------------------------------------------------------------------------|---------------------------------------------------------------------------------------------------------------|--------------------------------------------------------------------------------------------------------------------------------------------------------------------------------------------------------------------------------------------------------------------------------------------------------------------------------------|-----------------------------------------------------------------------------------------------------------------------------------------|----------------------------------------------------------------------------------------------------------------------------------------------------------------------------------------------------------------------------------------------------------------------------------|-------------------------------------------------------------------------------------------------------------------------------------------------------------------------------------------------------------------------------------------------------------------------------------------------------------------------------------------------------------------------------------------------------------------------------------------------------------------------------------------------------------|------------------------------------------------------------------------------------------------------------------------------------------------------------------------------------------------------------------------------------------------------------------------------------|----------------------------------------------------------------------------------------------------------------------------------------------------------------------------------------------|
| Regdanvimab                                                                                    |                                                                                                               |                                                                                                                                                                                                                                                                                                                                      |                                                                                                                                         |                                                                                                                                                                                                                                                                                  |                                                                                                                                                                                                                                                                                                                                                                                                                                                                                                             |                                                                                                                                                                                                                                                                                    |                                                                                                                                                                                              |
| Kim et al. 2021 (42)<br><br>NR<br><br>NCT04593641<br><br>Government, Industry<br>Some concerns | RCT (double-blinded),<br><br>Multicountry, Republic of Korea and Romania<br><br>14<br><br>B.1.1.7 (alpha): NR | COVID-19 vaccine received: no vaccination within 4 weeks<br><br>Previous SARS-CoV-2 infection: NR<br><br>Presence and/or duration of symptoms: at least 1 or more symptoms and onset within 7 days before drug administration and oxygen saturation of 94% or more<br><br>Disease severity: mild<br><br>Pregnant women: Not eligible | N=18<br><br>G1: 5<br>Regdanvimab (CT-P59) 20mg/kg<br><br>G2: 5<br>CT-P59 40mg/kg<br><br>G3: 5<br>CT-P59 80mg/kg<br><br>G4: 3<br>placebo | Age, years, median (IQR):<br>G1: 59.0 (56–59)<br>G2: 51.0 (48–52)<br>G3: 52.0 (43–57)<br>G4: 50.0 (49–57)<br><br>female (%):<br>G1: 60<br>G2: 60<br>G3: 0<br>G4: 33<br><br>Ethnicity (%):<br>Non-white:<br>G1: 100<br>G2: 0<br>G3: 0<br>G4: 33<br><br>Diagnostic tool:<br>RT-PCR | Proportion of symptomatic participants (%):<br>G1: 100<br>G2: 100<br>G3: 100<br>G4: 100<br><br>Duration of symptoms: median (IQR) days:<br>G1: 4.0 (3–5)<br>G2: 6.0 (5–6)<br>G3: 4.0 (4–4)<br>G4: 4.0 (4–6)<br><br>Proportion of participants with previous infections:<br>NR<br><br>Time (days) since previous infection:<br>NR<br><br>Proportion of vaccinated participants:<br>NR<br><br>Disease severity (%):<br>Mild:<br>G1: 100<br>G2: 100<br>G3: 100<br>G4: 100<br><br>Currently pregnant (%):<br>NA | Recovery <sup>†</sup> :<br>NR<br><br>Symptom duration (time until symptom free):<br>G1: 4.4 days<br>G2: 3.2 days<br>G3: 2.5 days<br>G4: 5.3 days<br>p=NR<br><br>All-cause mortality:<br>NR<br><br>COVID-19 specific mortality:<br>NR<br><br>Hospitalization due to COVID-19:<br>NR | Any AE:<br>At 14 days:<br>G1: 3/5 (60)<br>G2: 4/5 (80)<br>G3: 3/5 (60)<br>G4: 1/3 (33)<br>p=NR<br><br>Serious AE:<br>At 14 days:<br>G1: 0/5 (0)<br>G2: 0/5 (0)<br>G3: 0/5 (0)<br>G4: 0/3 (0) |

| Author, Year, Trial Name, Trial Registry No. Funding Risk of bias                                                   | Design, Country, Duration (days) Dominant variant at time of study (%)*                                  | Eligibility criteria                                                                                                                                                                                                                                                                                                | N total (randomized), Interventions, N group                                                                  | Population                                                                                                                                                                                                                                              | Baseline characteristics                                                                                                                                                                                                                                                                                                                                                                                                                                                 | Recovery, symptom duration, all-cause mortality, COVID-19 specific mortality, Hospitalization due to COVID-19 (n/N (%))                                                                                                                                                                                                                                                                                                                                                                                                                   | Incidence of any adverse events, incidence of serious adverse events (n/N (%))                                                                                               |
|---------------------------------------------------------------------------------------------------------------------|----------------------------------------------------------------------------------------------------------|---------------------------------------------------------------------------------------------------------------------------------------------------------------------------------------------------------------------------------------------------------------------------------------------------------------------|---------------------------------------------------------------------------------------------------------------|---------------------------------------------------------------------------------------------------------------------------------------------------------------------------------------------------------------------------------------------------------|--------------------------------------------------------------------------------------------------------------------------------------------------------------------------------------------------------------------------------------------------------------------------------------------------------------------------------------------------------------------------------------------------------------------------------------------------------------------------|-------------------------------------------------------------------------------------------------------------------------------------------------------------------------------------------------------------------------------------------------------------------------------------------------------------------------------------------------------------------------------------------------------------------------------------------------------------------------------------------------------------------------------------------|------------------------------------------------------------------------------------------------------------------------------------------------------------------------------|
| Streinu-Cercel et al. 2021 (34)<br><br>NCT04602000 and EudraCT 2020-003369-20<br><br>Government Industry<br><br>Low | RCT (double-blinded),<br><br>Republic of Korea, Romania, Spain, USA<br><br>28<br><br>B.1.1.7 (alpha): NR | COVID-19 vaccine received: Not eligible<br><br>Previous SARS-CoV-2 infection: NR<br><br>Presence and/or duration of symptoms: at least one infection-associated symptom within 7 and 2 days and an oxygen saturation of more than 94%<br><br>Disease severity: mild to moderate<br><br>Pregnant women: Not eligible | N=327<br><br>G1: 105<br>Regdanvimab 40 mg/kg<br><br>G2: 111<br>Regdanvimab 80 mg/kg<br><br>G3: 111<br>Placebo | Age, years, median (range):<br>G1: 51.0 (42-60)<br>G2: 51.0 (40-60)<br>G3: 52.0 (41-60)<br><br>female (%):<br>G1: 44<br>G2: 47<br>G3: 57<br><br>Ethnicity (%):<br>Non-White:<br>G1: 10<br>G2: 13<br>G3: 13<br><br>Diagnostic tool:<br>RT-PCR or antigen | Proportion of symptomatic participants (%):<br>G1: 100<br>G2: 100<br>G3: 100<br><br>Duration of symptoms:<br>Median (range)<br>G1: 3.0 (2-4)<br>G2: 3.0 (2-4)<br>G3: 3.0 (2-4)<br><br>Proportion of participants with previous infections (%):<br>NR<br><br>Time (days) since previous infection:<br>NR<br><br>Proportion of vaccinated participants:<br>NA<br><br>Disease severity (%):<br>Moderate:<br>G1: 61<br>G2: 59<br>G3: 54<br><br>Currently pregnant (%):<br>NA | Recovery <sup>†</sup> :<br>At 28 days:<br>G1: 82/94 (87)<br>G2: 79/92 (86)<br>G3: 71/99 (72)<br>RR 1.21 (95% CI 1.05 to 1.38)<br><br>Symptom duration (time until symptom free):<br>Median days (95%CI)<br>G1: 6.9 (5.5–9.4)<br>G2: 7.3 (5.7–9.3)<br>G3: 8.8 (7.0–11.8)<br>p=NR<br><br>All-cause mortality:<br>At 28 days:<br>G1: 0/105 (0)<br>G2: 0/110 (0)<br>G3: 0/110 (0)<br><br>COVID-19 specific mortality:<br>NR<br><br>Hospitalization due to COVID-19:<br>At 28 Days:<br>G1: 4/100 (4)<br>G2: 5/103 (5)<br>G3: 9/104 (9)<br>p=NR | Any AE:<br>At 28 Days:<br>G1: 31/105 (30)<br>G2: 27/110 (25)<br>G3: 34/110 (31)<br>p=NR<br><br>Serious AE:<br>At 28 days:<br>G1: 0/105 (0)<br>G2: 0/110 (0)<br>G3: 0/110 (0) |
| Sotrovimab                                                                                                          |                                                                                                          |                                                                                                                                                                                                                                                                                                                     |                                                                                                               |                                                                                                                                                                                                                                                         |                                                                                                                                                                                                                                                                                                                                                                                                                                                                          |                                                                                                                                                                                                                                                                                                                                                                                                                                                                                                                                           |                                                                                                                                                                              |

| Author, Year, Trial Name, Trial Registry No. Funding Risk of bias     | Design, Country, Duration (days) Dominant variant at time of study (%)*                                                   | Eligibility criteria                                                                                                                                                                                                                  | N total (randomized), Interventions, N group               | Population                                                                                                                                                                                                               | Baseline characteristics                                                                                                                                                                                                                                                                                                                                                                                                                             | Recovery, symptom duration, all-cause mortality, COVID-19 specific mortality, Hospitalization due to COVID-19 (n/N (%))                                                                                                                                                                                                                 | Incidence of any adverse events, incidence of serious adverse events (n/N (%))                                                                   |
|-----------------------------------------------------------------------|---------------------------------------------------------------------------------------------------------------------------|---------------------------------------------------------------------------------------------------------------------------------------------------------------------------------------------------------------------------------------|------------------------------------------------------------|--------------------------------------------------------------------------------------------------------------------------------------------------------------------------------------------------------------------------|------------------------------------------------------------------------------------------------------------------------------------------------------------------------------------------------------------------------------------------------------------------------------------------------------------------------------------------------------------------------------------------------------------------------------------------------------|-----------------------------------------------------------------------------------------------------------------------------------------------------------------------------------------------------------------------------------------------------------------------------------------------------------------------------------------|--------------------------------------------------------------------------------------------------------------------------------------------------|
| Gupta et al. 2022 (38)<br>COMET-ICE<br>NCT04545060<br>Industry<br>Low | RCT (double-blinded), USA, Canada, Brazil, Spain<br>29<br>B.1.1.7 (alpha): NR<br>B.1.617.2 (delta): NR<br>P.1 (gamma): NR | COVID-19 vaccine received: NR<br>Previous SARS-CoV-2 infection: NR<br>Presence and/or duration of symptoms: symptoms in the last five days before randomization<br>Disease severity: mild to moderate<br>Pregnant women: Not eligible | N=1057<br>G1=528<br>Sotrovimab 500 mg<br>G2=529<br>Placebo | Age, years, median IQR:<br>Overall: NR<br>G1: 53 (41.5-62)<br>G2: 53 (43-63)<br><br>female (%):<br>G1: 57<br>G2: 52<br><br>Ethnicity (%):<br>Non-white:<br>G1: 13<br>G2: 12<br><br>Diagnostic tool:<br>RT-PCR or antigen | Proportion of symptomatic participants (%):<br>G1: 100<br>G2: 100<br><br>Duration of symptoms (%):<br>G1: ≤3 days- 59<br>4-5 days- 40<br>5 days- <1<br>G2: ≤3 days- 59<br>4-5 days- 41<br>5 days- 0<br><br>Proportion of participants with previous infections:<br>NR<br><br>Time (days) since previous infection:<br>NR<br><br>Proportion of vaccinated participants:<br>NR<br><br>Disease severity (%):<br>NR<br><br>Currently pregnant (%):<br>NA | Recovery <sup>†</sup> :<br>NR<br><br>Symptom duration (time until symptom free):<br>NR<br><br>All-cause mortality:<br>At 29 days:<br>G1: 0/528 (0)<br>G2: 2/529 (0.4)<br>p=NR<br><br>COVID-19 specific mortality:<br>NR<br><br>Hospitalization due to COVID-19 <sup>‡</sup> :<br>At 29 days:<br>G1: 3/528 (1)<br>G2: 28/529 (5)<br>p=NR | Any AE:<br>At day 29<br>G1: 114/523 (22)<br>G2: 123/526 (23)<br>p=NR<br><br>Serious AE:<br>At day 29<br>G1: 11/523 (2)<br>G2: 32/526 (6)<br>p=NR |
| <b>Antibiotic or antiparasitic drugs</b>                              |                                                                                                                           |                                                                                                                                                                                                                                       |                                                            |                                                                                                                                                                                                                          |                                                                                                                                                                                                                                                                                                                                                                                                                                                      |                                                                                                                                                                                                                                                                                                                                         |                                                                                                                                                  |
| Azithromycin                                                          |                                                                                                                           |                                                                                                                                                                                                                                       |                                                            |                                                                                                                                                                                                                          |                                                                                                                                                                                                                                                                                                                                                                                                                                                      |                                                                                                                                                                                                                                                                                                                                         |                                                                                                                                                  |
| Oldenburg et al. 2021 (41)<br>ACTION: The Azithromycin for            | RCT (double-blinded), U.S.                                                                                                | COVID-19 vaccine received: NR<br>Previous SARS-                                                                                                                                                                                       | N=263<br>G1: 171<br>Azithromycin 1.2g oral                 | Age, years, mean (SD): median (IQR)<br>G1: 42 (35-49)<br>G2: 44 (35-51)                                                                                                                                                  | Proportion of symptomatic participants (%):<br>G1: 93<br>G2: 93                                                                                                                                                                                                                                                                                                                                                                                      | Recovery <sup>†</sup><br>At 14 days:<br>G1: 66/131 (50)<br>G2: 35/70 (50)<br>Prevalence ratio 1.01 (95%                                                                                                                                                                                                                                 | Any AE:<br>At 3 days:<br>G1: 82/145 (57)<br>G2: 19/72 (26)<br>p=NR                                                                               |

| Author, Year, Trial Name, Trial Registry No. Funding Risk of bias                                                                             | Design, Country, Duration (days) Dominant variant at time of study (%)* | Eligibility criteria                                                                                                                                                  | N total (randomized), Interventions, N group                                                                                                                        | Population                                                                                                                                                                                | Baseline characteristics                                                                                                                                                                                                                                                                                            | Recovery, symptom duration, all-cause mortality, COVID-19 specific mortality, Hospitalization due to COVID-19 (n/N (%))                                                                                                                       | Incidence of any adverse events, incidence of serious adverse events (n/N (%))                  |
|-----------------------------------------------------------------------------------------------------------------------------------------------|-------------------------------------------------------------------------|-----------------------------------------------------------------------------------------------------------------------------------------------------------------------|---------------------------------------------------------------------------------------------------------------------------------------------------------------------|-------------------------------------------------------------------------------------------------------------------------------------------------------------------------------------------|---------------------------------------------------------------------------------------------------------------------------------------------------------------------------------------------------------------------------------------------------------------------------------------------------------------------|-----------------------------------------------------------------------------------------------------------------------------------------------------------------------------------------------------------------------------------------------|-------------------------------------------------------------------------------------------------|
| COVID-19 Trial, Investigating Outpatients Nationwide Study NCT04332107 Industry Foundation/non-profit professional organization Some concerns | 21<br>B.1.1.7 (alpha): NR<br>B.1.617.2 (delta): NR                      | CoV-2 infection: NR<br>Presence and/or duration of symptoms: Participants were not required to be symptomatic<br>Disease severity: NR<br>Pregnant women: Not eligible | G2: 92 placebo                                                                                                                                                      | female (%):<br>G1: 69<br>G2: 62<br><br>Ethnicity (%):<br>Non-white:<br>G1: 41<br>G2: 36<br><br>Diagnostic tool:<br>RT-PCR or antigen                                                      | Duration of symptoms: median (IQR)<br>G1: 3 (2-4.5)<br>G2: 3 (2-4)<br><br>Proportion of participants with previous infections:<br>NR<br><br>Time (days) since previous infection:<br>NR<br><br>Proportion of vaccinated participants:<br>NR<br><br>Disease severity (%):<br>NR<br><br>Currently pregnant (%):<br>NA | CI 0.76 to 1.39)<br><br>Symptom duration (time until symptom free):<br>NR<br><br>All-cause mortality:<br>At 21 days:<br>G1: 0/171 (0)<br>G2: 0/92 (0)<br><br>COVID-19 specific mortality:<br>NR<br><br>Hospitalization due to COVID-19:<br>NR | Serious AE:<br>At 21 days:<br>G1: 0/171 (0)<br>G2: 0/92 (0)                                     |
| Chloroquine/Hydroxychloroquine                                                                                                                |                                                                         |                                                                                                                                                                       |                                                                                                                                                                     |                                                                                                                                                                                           |                                                                                                                                                                                                                                                                                                                     |                                                                                                                                                                                                                                               |                                                                                                 |
| Omrani et al. 2020 (28) Q-PROTECT NCT04349592 Government Some concerns                                                                        | RCT (double-blinded), Qatar 21<br>B.1.1.7 (alpha): NR                   | COVID-19 vaccine received: vaccine not available at study time<br>Previous SARS-CoV-2 infection: NA<br>Presence and/or duration of symptoms: NR<br>Disease severity:  | N=456<br>G1: 152 Hydrochloroquine 600 mg oral /azithromycin 500 mg on day 1, 250 mg from day 2<br>G2: 152 Hydroxychloroquine 600 mg oral+placebo<br>G3: 152 Placebo | Age, years, mean (SD):<br>G1: median 42<br>G2: median 40<br>G3: median 41<br><br>female (%):<br>G1: 1<br>G2: 2<br>G3: 1<br><br>Ethnicity (%):<br>Non-white:<br>NR<br><br>Diagnostic tool: | Proportion of symptomatic participants (%):<br>NR<br><br>Duration of symptoms:<br>NR<br><br>Proportion of participants with previous infections:<br>NA<br><br>Time (days) since previous infection:<br>NR<br><br>Proportion of vaccinated participants:                                                             | Recovery <sup>†</sup> :<br>NR<br><br>Symptom duration (time until symptom free):<br>NR<br><br>All-cause mortality:<br>At 21 days:<br>G1: 0/152(0)<br>G2: 0/152(0)<br>G3: 0/152(0)<br><br>COVID-19 specific mortality:                         | Any AE:<br>NR<br><br>Serious AE:<br>At 21 days:<br>G1: 0/152(0)<br>G2: 0/152(0)<br>G3: 0/152(0) |



| Author, Year, Trial Name, Trial Registry No. Funding Risk of bias                                                                             | Design, Country, Duration (days) Dominant variant at time of study (%)*                       | Eligibility criteria                                                                                                                                                                                                                   | N total (randomized), Interventions, N group                                                           | Population                                                                                                                                                                                                 | Baseline characteristics                                                                                                                                                                                                                                                                                                                                                      | Recovery, symptom duration, all-cause mortality, COVID-19 specific mortality, Hospitalization due to COVID-19 (n/N (%))                                                                                                                                                                                                                 | Incidence of any adverse events, incidence of serious adverse events (n/N (%))                                                   |
|-----------------------------------------------------------------------------------------------------------------------------------------------|-----------------------------------------------------------------------------------------------|----------------------------------------------------------------------------------------------------------------------------------------------------------------------------------------------------------------------------------------|--------------------------------------------------------------------------------------------------------|------------------------------------------------------------------------------------------------------------------------------------------------------------------------------------------------------------|-------------------------------------------------------------------------------------------------------------------------------------------------------------------------------------------------------------------------------------------------------------------------------------------------------------------------------------------------------------------------------|-----------------------------------------------------------------------------------------------------------------------------------------------------------------------------------------------------------------------------------------------------------------------------------------------------------------------------------------|----------------------------------------------------------------------------------------------------------------------------------|
|                                                                                                                                               |                                                                                               | mild or no symptoms<br><br>Pregnant women:<br>Not eligible                                                                                                                                                                             |                                                                                                        | RT-PCR                                                                                                                                                                                                     | NA<br><br>Disease severity (%):<br>NR<br><br>Currently pregnant (%):<br>NA                                                                                                                                                                                                                                                                                                    | At 21 days:<br>G1: 0/152(0)<br>G2: 0/152(0)<br>G3: 0/152(0)<br><br>Hospitalization due to COVID-19:<br>NR                                                                                                                                                                                                                               |                                                                                                                                  |
| Reis et al. 2021 (30)<br><br>TOGETHER<br><br>NCT04403100<br><br>Academic Foundation/non-profit professional organization<br><br>Some concerns | RCT (double-blinded),<br><br>Brazil<br><br>90<br><br>P.1 (gamma): NR<br>B.1.617.2 (delta): NR | COVID-19 vaccine received: NR<br><br>Previous SARS-CoV-2 infection: NR<br><br>Presence and/or duration of symptoms: less than 8 days since onset of flulike symptoms<br><br>Disease severity: mild<br><br>Pregnant women: Not eligible | N=441<br><br>G1: 214<br>Hydroxychloroquine 800 mg at day 1,400 mg from day 2<br><br>G2: 227<br>Placebo | Age, years, mean (SD): median (range)<br>G1: 53 (18-81)<br>G2: 53 (18-80)<br><br>female (%):<br>G1: 57<br>G2: 53<br><br>Ethnicity (%):<br>Non-white:<br>G1: 98<br>G2: 96<br><br>Diagnostic tool:<br>RT-PCR | Proportion of symptomatic participants (%):<br>G1: 100<br>G2: 100<br><br>Duration of symptoms:<br>NR<br><br>Proportion of participants with previous infections:<br>NR<br><br>Time (days) since previous infection:<br>NR<br><br>Proportion of vaccinated participants:<br>NR<br><br>Disease severity (%):<br>Mild<br>G1: 100<br>G2: 100<br><br>Currently pregnant (%):<br>NA | Recovery <sup>†</sup> :<br>NR<br><br>Symptom duration (time until symptom free):<br>NR<br><br>All-cause mortality:<br>At 90 days:<br>G1: 0/214 (0)<br>G2: 1/227 (0.4)<br><br>COVID-19 specific mortality:<br>NR<br><br>Hospitalization due to COVID-19:<br>At 90 days<br>G1: 8/214 (4)<br>G2: 11/227 (5)<br>HR (95%CI) 0.76 (0.30-1.88) | Any AE:<br>At 90 days<br>G1: 46/207 (22)<br>G2: 46/220 (21)<br><br>Serious AE:<br>At 90 days<br>G1: 11/207 (5)<br>G2: 12/220 (6) |
| Schwartz et al. 2021 (27)<br><br>ALBERTA HOPE                                                                                                 | RCT (double-blinded),<br><br>Canada                                                           | COVID-19 vaccine received<br>Vaccination: NR                                                                                                                                                                                           | N=148<br><br>G1: 111<br>Hydroxychloroquine 800 mg oral on                                              | Age, years, mean (SD):<br>G1: 46.7<br>G2: 46.9                                                                                                                                                             | Proportion of symptomatic participants (%):<br>G1: 100<br>G2: 100                                                                                                                                                                                                                                                                                                             | Recovery <sup>†</sup> :<br>At 30 days:<br>G1: 67/110 (61)<br>G2: 29/37 (78)                                                                                                                                                                                                                                                             | Any AE:<br>NR<br><br>Serious AE:                                                                                                 |

| Author, Year, Trial Name, Trial Registry No. Funding Risk of bias                                         | Design, Country, Duration (days) Dominant variant at time of study (%)*              | Eligibility criteria                                                                                                                                                     | N total (randomized), Interventions, N group                                                               | Population                                                                                                                                        | Baseline characteristics                                                                                                                                                                                                                                                                        | Recovery, symptom duration, all-cause mortality, COVID-19 specific mortality, Hospitalization due to COVID-19 (n/N (%))                                                                                                                                                                                                                                         | Incidence of any adverse events, incidence of serious adverse events (n/N (%))                        |
|-----------------------------------------------------------------------------------------------------------|--------------------------------------------------------------------------------------|--------------------------------------------------------------------------------------------------------------------------------------------------------------------------|------------------------------------------------------------------------------------------------------------|---------------------------------------------------------------------------------------------------------------------------------------------------|-------------------------------------------------------------------------------------------------------------------------------------------------------------------------------------------------------------------------------------------------------------------------------------------------|-----------------------------------------------------------------------------------------------------------------------------------------------------------------------------------------------------------------------------------------------------------------------------------------------------------------------------------------------------------------|-------------------------------------------------------------------------------------------------------|
| COVID-19<br>NCT04329611<br>Government<br>Industry<br>Academic<br>Some concerns                            | 30<br>B.1.1.7 (alpha): NR<br>B.1.617.2 (delta): NR                                   | Previous SARS-CoV-2 infection: NR<br>Presence and/or duration of symptoms: symptom onset within previous 12 days<br>Disease severity: NR<br>Pregnant women: Not eligible | day 1, 400 mg after<br>G2: 37<br>placebo                                                                   | female (%):<br>G1: 41<br>G2: 54<br><br>Ethnicity:<br>Non-white (%):<br>G1: 68<br>G2: 58<br><br>Diagnostic tool:<br>RT-PCR                         | Duration of symptoms: mean (95% CI)<br>G1: 14 (10-20)<br>G2: 12 (7-18)<br><br>Proportion of participants with previous infections: NR<br><br>Time (days) since infection: NR<br><br>Proportion of vaccinated participants: NR<br><br>Disease severity (%): NR<br><br>Currently pregnant (%): NA | Symptom duration (time until symptom free): median (95% CI)<br>G1: 14 (10-20)<br>G2: 12 (7-18)<br>p=0.3<br><br>All-cause mortality:<br>At 30 days:<br>G1: 0/111 (0)<br>G2: 0/37 (0)<br><br>COVID-19 specific mortality:<br>At 30 days:<br>G1: 0/111 (0)<br>G2: 0/37 (0)<br><br>Hospitalization due to COVID-19:<br>At 30 days:<br>G1: 4/110 (4)<br>G2: 0/37 (0) | At 30 days:<br>G1: 3/91 (3)<br>G2: 0/33 (0)<br>p=0.6                                                  |
| Ivermectin                                                                                                |                                                                                      |                                                                                                                                                                          |                                                                                                            |                                                                                                                                                   |                                                                                                                                                                                                                                                                                                 |                                                                                                                                                                                                                                                                                                                                                                 |                                                                                                       |
| Buonfrate et al. 2022 (48)<br>COVER Study<br>NCT04438850<br>Industry<br>Academic<br>Foundation/non-profit | RCT (double-blinded),<br>Italy<br>30<br>B.1.1.7 (alpha): NR<br>B.1.617.2 (delta): NR | COVID-19 vaccine received: NR<br>Previous SARS-CoV-2 infection: NR<br>Presence and/or duration of symptoms: NR                                                           | N=93<br>G1: 29<br>Ivermectin 600mg/kg plus placebo<br>G2: 32<br>Ivermectin 1200 mg/kg<br>G3: 32<br>placebo | Age, years, median (IQR)<br>G1: 47.0 (31.0-62.0)<br>G2: 44.5 (31.0-55.5)<br>G3: 50.0 (26.0-57.0)<br><br>female (%):<br>G1: 48<br>G2: 25<br>G3: 53 | Proportion of symptomatic participants (%):<br>G1: 83<br>G2: 91<br>G3: 84<br><br>Duration of symptoms: Median (IQR)<br>G1: 4.0 (3.0-5.0)<br>G2: 4.0 (3.0-6.0)<br>G3: 4.0 (2.0-6.0)                                                                                                              | Recovery <sup>†</sup> :<br>At 30 days:<br>G1: 19/24 (79)<br>G2: 21/29 (72)<br>G3: 21/27 (78)<br>p=NR<br><br>Symptom duration (time until symptom free) (median (IQR)):<br>At 30 days:                                                                                                                                                                           | Any AE:<br>NR<br><br>Serious AE:<br>At 30 days***:<br>G1: 1 (4)<br>G2: 3 (10)<br>G3: 0/30 (0)<br>p=NR |

| Author, Year, Trial Name, Trial Registry No. Funding Risk of bias             | Design, Country, Duration (days) Dominant variant at time of study (%)*                      | Eligibility criteria                                                                                                                | N total (randomized), Interventions, N group                                      | Population                                                                                                                                               | Baseline characteristics                                                                                                                                                                                                                                                                                                                                                                                 | Recovery, symptom duration, all-cause mortality, COVID-19 specific mortality, Hospitalization due to COVID-19 (n/N (%))                                                                                                                                                                                                                                                         | Incidence of any adverse events, incidence of serious adverse events (n/N (%))                                           |
|-------------------------------------------------------------------------------|----------------------------------------------------------------------------------------------|-------------------------------------------------------------------------------------------------------------------------------------|-----------------------------------------------------------------------------------|----------------------------------------------------------------------------------------------------------------------------------------------------------|----------------------------------------------------------------------------------------------------------------------------------------------------------------------------------------------------------------------------------------------------------------------------------------------------------------------------------------------------------------------------------------------------------|---------------------------------------------------------------------------------------------------------------------------------------------------------------------------------------------------------------------------------------------------------------------------------------------------------------------------------------------------------------------------------|--------------------------------------------------------------------------------------------------------------------------|
| professional organization<br>High                                             | B.1.1.529 (omicron): NR                                                                      | Disease severity: mild to moderate<br><br>Pregnant women: Not eligible                                                              |                                                                                   | Ethnicity (%):<br>Non-white: NR<br><br>Diagnostic tool: RT-PCR                                                                                           | Proportion of participants with previous infections: NR<br><br>Time (days) since previous infection: NR<br><br>Proportion of vaccinated participants:<br>G1: 3<br>G2: 0<br>G3: 3<br><br>Disease severity (%):<br>COVID-19 severity score (%):<br>no limitation of activities:<br>G1: 83<br>G2: 84<br>G3: 84<br>limitation of activities:<br>G1: 17<br>G2: 16<br>G3: 16<br><br>Currently pregnant (%): NA | G1: 29.0 (13.5-32)<br>G2: 14.0 (7-37)<br>G3: 14.0 (13-30)<br><br>All-cause mortality***:<br>At 30 days:<br>G1: 0/24 (0)<br>G2: 0/29 (0)<br>G3: 0/27(0)<br><br>COVID-19 specific mortality***:<br>At 30 days:<br>G1: 0/24 (0)<br>G2: 0/29 (0)<br>G3: 0/27 (0)<br><br>Hospitalization due to COVID-19:<br>At 30 days***<br>G1: 1/29 (3)<br>G2: 3/30 (10)<br>G3: 0/30 (10)<br>p=NR |                                                                                                                          |
| Chaccour et al. 2021 (29)<br>none<br>NCT04390022<br>Academic<br>Some concerns | RCT (double-blinded),<br><br>Spain<br>28<br><br>B.1.1.7 (alpha): NR<br>B.1.617.2 (delta): NR | COVID-19 vaccine received: NR<br><br>Previous SARS-CoV-2 infection: NR<br><br>Presence and/or duration of symptoms: symptoms for no | N=24<br><br>G1: 12<br>Ivermectin 400 mcg/kg body weight oral<br>G2: 12<br>placebo | Age, years, mean (SD):<br>Median (IQR)<br>G1: 26 (19-36)<br>G2: 26 (21-44)<br><br>female (%):<br>G1: 42<br>G2: 58<br><br>Ethnicity (%):<br>Non-white: NR | Proportion of symptomatic participants (%):<br>G1: 100<br>G2: 100<br><br>Duration of symptoms: median (IQR) hours<br>G1: 24 (24-48)<br>G2: 48 (36-48)<br><br>Proportion of participants with previous infections:                                                                                                                                                                                        | Recovery <sup>†</sup> : NR<br><br>Symptom duration (time until symptom free): NR<br><br>All-cause mortality:<br>At 28 days:<br>G1: 0/12 (0)<br>G2: 0/12 (0)                                                                                                                                                                                                                     | Any AE:<br>At 28 days<br>G1: 5/12 (42)<br>G2: 5/12 (42)<br><br>Serious AE:<br>At 28 days<br>G1: 0/12 (0)<br>G2: 0/12 (0) |

| Author, Year, Trial Name, Trial Registry No. Funding Risk of bias                                                  | Design, Country, Duration (days) Dominant variant at time of study (%)*                    | Eligibility criteria                                                                                                                                                                                                              | N total (randomized), Interventions, N group                                    | Population                                                                                                                                                                                                    | Baseline characteristics                                                                                                                                                                                                                                                                                                                                | Recovery, symptom duration, all-cause mortality, COVID-19 specific mortality, Hospitalization due to COVID-19 (n/N (%))                                                                                                                                                                                                                                    | Incidence of any adverse events, incidence of serious adverse events (n/N (%))         |
|--------------------------------------------------------------------------------------------------------------------|--------------------------------------------------------------------------------------------|-----------------------------------------------------------------------------------------------------------------------------------------------------------------------------------------------------------------------------------|---------------------------------------------------------------------------------|---------------------------------------------------------------------------------------------------------------------------------------------------------------------------------------------------------------|---------------------------------------------------------------------------------------------------------------------------------------------------------------------------------------------------------------------------------------------------------------------------------------------------------------------------------------------------------|------------------------------------------------------------------------------------------------------------------------------------------------------------------------------------------------------------------------------------------------------------------------------------------------------------------------------------------------------------|----------------------------------------------------------------------------------------|
|                                                                                                                    |                                                                                            | more than 72 hours before enrolment.<br><br>Disease severity: mild to moderate<br><br>Pregnant women: Not eligible                                                                                                                |                                                                                 | Diagnostic tool: RT-PCR                                                                                                                                                                                       | G1: 0<br>G2: 0<br><br>Time (days) since previous infection: NR<br><br>Proportion of vaccinated participants: NR<br><br>Disease severity (%): NR<br><br>Currently pregnant (%): NA                                                                                                                                                                       | COVID-19 specific mortality:<br>At 28 days<br>G1: 0/12 (0)<br>G2: 0/12 (0)<br><br>Hospitalization due to COVID-19:<br>G1: 0/12 (0)<br>G2: 0/12 (0)                                                                                                                                                                                                         |                                                                                        |
| López-Medina et al. 2021 (26)<br><br>(EPIC Trial) (EPIC)<br><br>NCT04405843<br><br>Government<br><br>Some concerns | RCT (double-blinded),<br><br>Colombia<br><br>21<br><br>B.1.621 (mu): NR<br>P.1 (gamma): NR | COVID-19 vaccine received: NR<br><br>Previous SARS-CoV-2 infection: NR<br><br>Presence and/or duration of symptoms: within the last 7 days before randomisation<br><br>Disease severity: mild<br><br>Pregnant women: Not eligible | N=476<br><br>G1: 238<br>Ivermectin 300 mcg/kg body weight<br>G2: 238<br>placebo | Age, years, mean (SD):<br>Median (IQR)<br>G1: 37 (29.0-47.7)<br>G2: 37 (28.7-49.2)<br><br>female (%):<br>G1: 61<br>G2: 55<br><br>Ethnicity (%):<br>Non-white: NR<br><br>Diagnostic tool:<br>RT-PCR or antigen | Proportion of symptomatic participants (%):<br>G1: 100<br>G2: 100<br><br>Duration of symptoms: median (IQR)<br>G1: 5 (4-6)<br>G2: 5 (4-6)<br><br>Proportion of participants with previous infections: NR<br><br>Time (days) since previous infection: NR<br><br>Proportion of vaccinated participants: NR<br><br>Disease severity (%):<br>Mild: G1: 100 | Recovery <sup>†</sup> :<br>At 21 days:<br>G1: 164/200 (82)<br>G2: 156/198 (79)<br>p=NR<br><br>Symptom duration (time until symptom free) (median(IQR)):<br>At 21 days:<br>G1: 10 (9-13)<br>G2: 12 (9-13)<br><br>All-cause mortality:<br>At 21 days:<br>G1: 0/200 (0)<br>G2: 1/198 (1)<br><br>COVID-19 specific mortality: NR<br><br>Hospitalization due to | Any AE: NR<br><br>Serious AE:<br>At 21 days:<br>G1: 2/200 (1)<br>G2: 2/198 (1)<br>p=NR |

| Author, Year, Trial Name, Trial Registry No. Funding Risk of bias                                                                     | Design, Country, Duration (days) Dominant variant at time of study (%)*                          | Eligibility criteria                                                                                                                                                                                                   | N total (randomized), Interventions, N group                                               | Population                                                                                                                                                                                                             | Baseline characteristics                                                                                                                                                                                                                                                                                                                                                                                                                                      | Recovery, symptom duration, all-cause mortality, COVID-19 specific mortality, Hospitalization due to COVID-19 (n/N (%))                                                                                                                                                                                                                                      | Incidence of any adverse events, incidence of serious adverse events (n/N (%))                                                     |
|---------------------------------------------------------------------------------------------------------------------------------------|--------------------------------------------------------------------------------------------------|------------------------------------------------------------------------------------------------------------------------------------------------------------------------------------------------------------------------|--------------------------------------------------------------------------------------------|------------------------------------------------------------------------------------------------------------------------------------------------------------------------------------------------------------------------|---------------------------------------------------------------------------------------------------------------------------------------------------------------------------------------------------------------------------------------------------------------------------------------------------------------------------------------------------------------------------------------------------------------------------------------------------------------|--------------------------------------------------------------------------------------------------------------------------------------------------------------------------------------------------------------------------------------------------------------------------------------------------------------------------------------------------------------|------------------------------------------------------------------------------------------------------------------------------------|
|                                                                                                                                       |                                                                                                  |                                                                                                                                                                                                                        |                                                                                            |                                                                                                                                                                                                                        | G2: 100<br><br>Currently pregnant (%):<br>NA                                                                                                                                                                                                                                                                                                                                                                                                                  | COVID-19:<br>NR                                                                                                                                                                                                                                                                                                                                              |                                                                                                                                    |
| Reis et al., 2022 (49)<br><br>TOGETHER<br><br>NCT04727424<br><br>Foundation/non-profit professional organization<br><br>Some concerns | RCT (double-blinded),<br><br>Brazil<br><br>28<br><br>P.1 (gamma):<br>NR<br>B.1.617.2 (delta): NR | COVID-19 vaccine received:<br>Eligible<br><br>Previous SARS-CoV-2 infection:<br>NR<br><br>Presence and/or duration of symptoms: less than 7 days<br><br>Disease severity:<br>NR<br><br>Pregnant women:<br>Not eligible | N=1,358<br><br>G1: 679<br>Ivermectin 400 mcg/kg body weight oral<br><br>G2: 679<br>placebo | Age, years, mean (SD):<br>Median (IQR)<br>G1: 49 (39–57)<br>G2: 49 (37–56)<br><br>female (%):<br>G1: 56<br>G2: 60<br><br>Ethnicity (%):<br>Non-white:<br>G1: 99<br>G2: 99<br><br>Diagnostic tool:<br>RT-PCR or antigen | Proportion of symptomatic participants (%):<br>G1: 100<br>G2: 100<br><br>Duration of symptoms:<br>0–3 days: n (%)<br>G1: 302 (44.5)<br>G2: 295 (43.4)<br>4–7 days: n (%)<br>G1: 377 (55.5)<br>G2: 384 (56.6)<br><br>Proportion of participants with previous infections:<br>NR<br><br>Time (days) since previous infection:<br>NR<br><br>Proportion of vaccinated participants:<br>NR<br><br>Disease severity (%):<br>NR<br><br>Currently pregnant (%):<br>NA | Recovery: NR<br><br>Symptom duration (time until symptom free) (median(IQR)):<br>At 28 days:<br>G1: 14 (11 to 14)<br>G2: 14 (11 to 14)<br><br>All-cause mortality:<br>At 28 days:<br>G1: 21/679 (3)<br>G2: 24/679 (4)<br><br>COVID-19 specific mortality:<br>NR<br><br>Hospitalization due to COVID-19:<br>At 28 days:<br>G1: 78/679 (12)<br>G2: 93/679 (14) | Any AE:<br>At 28 days<br>G1: 123/679 (18)<br>G2: 156/679 (23)<br><br>Serious AE:<br>At 28 days<br>G1: 17/679 (3)<br>G2: 18/679 (3) |
| Vallejos et al. 2021 (47)<br><br>IVER-COR COVID19                                                                                     | RCT (double-blinded),<br><br>Argentina                                                           | COVID-19 vaccine received:<br>NR<br><br>Previous SARS-                                                                                                                                                                 | N=501<br><br>G1: 250<br>Ivermectin 24-48 mg                                                | Age, years, mean (SD):<br>G1: 42.58 (15.29)<br>G2: 42.40 (15.75)<br><br>female (%):                                                                                                                                    | Proportion of symptomatic participants (%):<br>G1: 96<br>G2: 96                                                                                                                                                                                                                                                                                                                                                                                               | Recovery <sup>†</sup> :<br>NR<br><br>Symptom duration (time until symptom free):                                                                                                                                                                                                                                                                             | Any AE:<br>NR<br><br>Serious AE:<br>NR                                                                                             |

| Author, Year, Trial Name, Trial Registry No. Funding Risk of bias                         | Design, Country, Duration (days) Dominant variant at time of study (%)*                       | Eligibility criteria                                                                                                                                                    | N total (randomized), Interventions, N group                               | Population                                                                                                                                                                           | Baseline characteristics                                                                                                                                                                                                                                                                             | Recovery, symptom duration, all-cause mortality, COVID-19 specific mortality, Hospitalization due to COVID-19 (n/N (%))                                                                                                                              | Incidence of any adverse events, incidence of serious adverse events (n/N (%))                                                           |
|-------------------------------------------------------------------------------------------|-----------------------------------------------------------------------------------------------|-------------------------------------------------------------------------------------------------------------------------------------------------------------------------|----------------------------------------------------------------------------|--------------------------------------------------------------------------------------------------------------------------------------------------------------------------------------|------------------------------------------------------------------------------------------------------------------------------------------------------------------------------------------------------------------------------------------------------------------------------------------------------|------------------------------------------------------------------------------------------------------------------------------------------------------------------------------------------------------------------------------------------------------|------------------------------------------------------------------------------------------------------------------------------------------|
| NCT04529525<br><br>Government Academic<br><br>Low                                         | 30<br><br>P.1 (gamma): NR<br>C.37 (Iambra): NR                                                | CoV-2 infection: NR<br><br>Presence and/or duration of symptoms: NR<br><br>Disease severity: mild to moderate<br><br>Pregnant women: Not eligible                       | G2: 251<br>Placebo                                                         | G1: 44<br>G2: 50<br><br>Ethnicity (%): NR<br><br>Diagnostic tool: RT-PCR                                                                                                             | Duration of symptoms:<br>G1: 4 (3-5)<br>G2: 4 (3-6)<br><br>Proportion of participants with previous infections:<br>NR<br><br>Time (days) since previous infection:<br>NR<br><br>Proportion of vaccinated participants:<br>NR<br><br>Disease severity (%):<br>NR<br><br>Currently pregnant (%):<br>NA | NR<br><br>All-cause mortality:<br>At 30 days:<br>G1: 4/250 (2)<br>G2: 3/251 (1)<br>p=NR<br><br>COVID-19 specific mortality:<br>NR<br><br>Hospitalization due to COVID-19:<br>At 30 days:<br>G1: 14/250 (6)<br>G2: 21/251 (8)<br>p=NR                 |                                                                                                                                          |
| Nitazoxanide                                                                              |                                                                                               |                                                                                                                                                                         |                                                                            |                                                                                                                                                                                      |                                                                                                                                                                                                                                                                                                      |                                                                                                                                                                                                                                                      |                                                                                                                                          |
| Rocco et al. 2021 (32)<br><br>NCT04552483<br><br>Government Academic<br><br>Some concerns | RCT (double-blinded),<br><br>Brazil<br><br>14<br><br>P.1 (gamma): NR<br>B.1.617.2 (delta): NR | COVID-19 vaccine received: NR<br><br>Previous SARS-CoV-2 infection: NR<br><br>Presence and/or duration of symptoms: clinical symptoms of COVID-19 no longer than 3 days | N=475<br><br>G1: 238<br>Nitazoxanide 500 mg oral<br><br>G2: 237<br>Placebo | Age, years, (%):<br>18–39 years<br>G1: 59<br>G2: 57<br>40–59 years<br>G1: 35<br>G2: 37<br>60–77 years<br>G1: 6<br>G2: 6<br><br>female (%):<br>G1: 48<br>G2: 58<br><br>Ethnicity (%): | Proportion of symptomatic participants (%):<br>G1: 100<br>G2: 100<br><br>Duration of symptoms (median [IQR]):<br>G1: 5 (4-5)<br>G2: 5 (4-5)<br><br>Proportion of participants with previous infections:<br>NR<br><br>Time (days) since previous infection:<br>NR                                     | Recovery <sup>†</sup> :<br>At 5 days:<br>G1: 135/194 (70)<br>G2: 146/198 (74)<br>p=NR<br><br>Symptom duration (time until symptom free):<br>NR<br><br>All-cause mortality:<br>At 14 days:<br>G1: 0/238 (0)<br>G2: 0/237 (0)<br><br>COVID-19 specific | Any AE:<br>At 5 days<br>G1: 60/238 (25)<br>G2: 60/237 (25)<br>p=NR<br><br>Serious AE:<br>At 5 days<br>G1: 1/238 (0.4)<br>G2: 1/237 (0.4) |

| Author, Year, Trial Name, Trial Registry No. Funding Risk of bias                  | Design, Country, Duration (days) Dominant variant at time of study (%)*                             | Eligibility criteria                                                                                                                                                                                                                                                                                                                            | N total (randomized), Interventions, N group                             | Population                                                                                                                                                                                                        | Baseline characteristics                                                                                                                                                                                                                                                                                                                                                                  | Recovery, symptom duration, all-cause mortality, COVID-19 specific mortality, Hospitalization due to COVID-19 (n/N (%))                                                                                                                                                                                                                                                                                                               | Incidence of any adverse events, incidence of serious adverse events (n/N (%))                                                                     |
|------------------------------------------------------------------------------------|-----------------------------------------------------------------------------------------------------|-------------------------------------------------------------------------------------------------------------------------------------------------------------------------------------------------------------------------------------------------------------------------------------------------------------------------------------------------|--------------------------------------------------------------------------|-------------------------------------------------------------------------------------------------------------------------------------------------------------------------------------------------------------------|-------------------------------------------------------------------------------------------------------------------------------------------------------------------------------------------------------------------------------------------------------------------------------------------------------------------------------------------------------------------------------------------|---------------------------------------------------------------------------------------------------------------------------------------------------------------------------------------------------------------------------------------------------------------------------------------------------------------------------------------------------------------------------------------------------------------------------------------|----------------------------------------------------------------------------------------------------------------------------------------------------|
|                                                                                    |                                                                                                     | Disease severity: mild<br><br>Pregnant women: Not eligible                                                                                                                                                                                                                                                                                      |                                                                          | Non-White<br>G1: 32<br>G2: 30<br><br>Diagnostic tool: RT-PCR                                                                                                                                                      | Proportion of vaccinated participants: NR<br><br>Disease severity (%): Mild: G1: 100<br>G2: 100<br><br>Currently pregnant (%): NA                                                                                                                                                                                                                                                         | mortality: NR<br><br>Hospitalization due to COVID-19 <sup>§</sup> :<br>At 5 days:<br>G1: 5/238 (2)<br>G2: 5/237 (2)<br>p=NR                                                                                                                                                                                                                                                                                                           |                                                                                                                                                    |
| Rossignol et al. 2022 (43)<br><br>NCT04486313<br><br>Industry<br><br>Some concerns | RCT (double-blinded),<br><br>U.S.<br><br>28<br><br>B.1.617.2 (delta): NR<br>B.1.1.529 (omicron): NR | COVID-19 vaccine received not eligible if received within 30 days prior to screening<br><br>Previous SARS-CoV-2 infection: not eligible<br><br>Presence and/or duration of symptoms: at least two respiratory symptom domains related to Covid-19 within 72 hours<br><br>Disease severity: mild to moderate<br><br>Pregnant women: Not eligible | N=1,092<br><br>G1: 628<br>Nitazoxanide 1200 mg<br><br>G2: 464<br>Placebo | Age, years, median (IQR):<br>Overall: 40 (12–83)<br>G1: 38 (12–83)<br>G2: 42 (13–81)<br><br>female (%):<br>G1: 55<br>G2: 58<br><br>Ethnicity (%):<br>Non-White<br>G1: 36<br>G2: 41<br><br>Diagnostic tool: RT-PCR | Proportion of symptomatic participants (%):<br>G1: 100<br>G2: 100<br><br>Duration of symptoms: Hours<br>G1: 43.9<br>G2: 46.5<br><br>Proportion of participants with previous infections: NR<br><br>Time (days) since previous infection: NR<br><br>Proportion of vaccinated participants: NR<br><br>Disease severity (%): Moderate:<br>G1: 37<br>G2: 33<br><br>Currently pregnant (%): NA | Recovery <sup>†</sup> : NR<br><br>Symptom duration (time until symptom free): Median (IQR) TSR (days)<br>G1: 13.3 (6.3, >21)<br>G2: 12.4 (7.2, >21)<br>p=0.88<br><br>All-cause mortality: At 28 days:<br>G1: 2/472 (0.4)<br>G2: 0/463 (0)<br>p=NR<br><br>COVID-19 specific mortality: At 28 days:<br>G1: 1/472 (0.2)<br>G2: 0/463 (0)<br>p=NR<br><br>Hospitalization due to COVID-19 <sup>§</sup> :<br>At 28 days:<br>G1: 1/472 (0.2) | Any AE:<br>At 28 days:<br>G1: 63/472 (13)<br>G2: 75/463 (16)<br>p=NR<br><br>Serious AE:<br>At 28 days:<br>G1: 2/472 (0.4)<br>G2: 7/463 (2)<br>p=NR |

| Author, Year, Trial Name, Trial Registry No. Funding Risk of bias                                                                                       | Design, Country, Duration (days) Dominant variant at time of study (%)*           | Eligibility criteria                                                                                                                                                                                                                                                         | N total (randomized), Interventions, N group                                        | Population                                                                                                                                                                   | Baseline characteristics                                                                                                                                                                                                                                                                                                                                                                                                               | Recovery, symptom duration, all-cause mortality, COVID-19 specific mortality, Hospitalization due to COVID-19 (n/N (%))                                                                                                                                                                                                                                                                                                                                                                 | Incidence of any adverse events, incidence of serious adverse events (n/N (%))                                                                 |
|---------------------------------------------------------------------------------------------------------------------------------------------------------|-----------------------------------------------------------------------------------|------------------------------------------------------------------------------------------------------------------------------------------------------------------------------------------------------------------------------------------------------------------------------|-------------------------------------------------------------------------------------|------------------------------------------------------------------------------------------------------------------------------------------------------------------------------|----------------------------------------------------------------------------------------------------------------------------------------------------------------------------------------------------------------------------------------------------------------------------------------------------------------------------------------------------------------------------------------------------------------------------------------|-----------------------------------------------------------------------------------------------------------------------------------------------------------------------------------------------------------------------------------------------------------------------------------------------------------------------------------------------------------------------------------------------------------------------------------------------------------------------------------------|------------------------------------------------------------------------------------------------------------------------------------------------|
|                                                                                                                                                         |                                                                                   |                                                                                                                                                                                                                                                                              |                                                                                     |                                                                                                                                                                              |                                                                                                                                                                                                                                                                                                                                                                                                                                        | G2: 4/463 (1)<br>p=NR                                                                                                                                                                                                                                                                                                                                                                                                                                                                   |                                                                                                                                                |
| <b>Convalescent plasma</b>                                                                                                                              |                                                                                   |                                                                                                                                                                                                                                                                              |                                                                                     |                                                                                                                                                                              |                                                                                                                                                                                                                                                                                                                                                                                                                                        |                                                                                                                                                                                                                                                                                                                                                                                                                                                                                         |                                                                                                                                                |
| Aleman et al. 2022 (37)<br><br>CONV-ERT<br><br>NCT04621123<br><br>Industry<br>Academic<br>Foundation/non-profit<br>professional organization<br><br>Low | RCT (double-blinded)<br><br>Spain<br>28<br><br>B.1.1.7 (alpha): NR<br>B.1.177: NR | COVID-19 vaccine received: Not eligible<br><br>Previous SARS-CoV-2 infection: Not eligible<br><br>Presence and/or duration of symptoms: symptom onset no more than 7 days before randomisation<br><br>Disease severity: mild-to-moderate<br><br>Pregnant women: Not eligible | N=376<br><br>G1: 188<br>Convalescent plasma 250–300 mL IV<br><br>G2: 188<br>Placebo | Age, years, median (IQR)<br>G1: 56 (52–62)<br>G2: 56 (53–63)<br><br>female (%):<br>G1: 44<br>G2: 48<br><br>Ethnicity (%):<br>NR<br><br>Diagnostic tool:<br>RT-PCR or antigen | Proportion of symptomatic participants (%):<br>G1: 100<br>G2: 100<br><br>Duration of symptoms:<br>G1: 4.4 (1.4)<br>G2: 4.4 (1.4)<br><br>Proportion of participants with previous infections<br>NA<br><br>Time (days) since previous infection:<br>NA<br><br>Proportion of vaccinated participants:<br>NA<br><br>Disease severity (%):<br>Mild:<br>G1: 97<br>G2: 97<br>Moderate:<br>G1: 3<br>G2: 3<br><br>Currently pregnant (%):<br>NA | Recovery <sup>†</sup> :<br>NR<br><br>Symptom duration (time until symptom free):<br>Days (Median (IQR))<br>G1: 12.0 (6.0–21.3)<br>G2: 12.0 (6.0–22.0)<br>HR 1.05 (95% CI 0.85 to 1.30)<br><br>All-cause mortality:<br>At 28 days:<br>G1: 0/188 (0)<br>G2: 2/188 (1)<br>RR 0.20 (95% CI, 0.01 to 4.14)<br><br>COVID-19 specific mortality:<br>NR<br><br>Hospitalization due to COVID-19:<br>At 28 days:<br>G1: 22/188 (12)<br>G2: 21/188 (11)<br>p=0.76<br>RR 1.05 (95 CI, 0.78 to 1.41) | Any AE:<br>At 28 days:<br>G1: 24/188 (13)<br>G2: 8/188 (4)<br>p=NR<br><br>Serious AE:<br>At 28 days:<br>G1: 1/188 (1)<br>G2: 0/188 (0)<br>p=NR |
| Korley et al. 2021 (36)                                                                                                                                 | RCT (single-blinded)                                                              | COVID-19 vaccine received: not eligible                                                                                                                                                                                                                                      | N=511<br><br>G1: 257                                                                | Age, years, median (IQR)<br>G1: 54 (42–62)                                                                                                                                   | Proportion of symptomatic participants (%):<br>NR                                                                                                                                                                                                                                                                                                                                                                                      | Recovery <sup>†</sup> :<br>NR                                                                                                                                                                                                                                                                                                                                                                                                                                                           | Any AE:<br>NR                                                                                                                                  |



| Author, Year, Trial Name, Trial Registry No. Funding Risk of bias                                                                                     | Design, Country, Duration (days) Dominant variant at time of study (%)*                      | Eligibility criteria                                                                                                                                                                         | N total (randomized), Interventions, N group                               | Population                                                                                                                                                      | Baseline characteristics                                                                                                                                                                                                                                                                                                                             | Recovery, symptom duration, all-cause mortality, COVID-19 specific mortality, Hospitalization due to COVID-19 (n/N (%))                                                                                                                                                                                                     | Incidence of any adverse events, incidence of serious adverse events (n/N (%))                                     |
|-------------------------------------------------------------------------------------------------------------------------------------------------------|----------------------------------------------------------------------------------------------|----------------------------------------------------------------------------------------------------------------------------------------------------------------------------------------------|----------------------------------------------------------------------------|-----------------------------------------------------------------------------------------------------------------------------------------------------------------|------------------------------------------------------------------------------------------------------------------------------------------------------------------------------------------------------------------------------------------------------------------------------------------------------------------------------------------------------|-----------------------------------------------------------------------------------------------------------------------------------------------------------------------------------------------------------------------------------------------------------------------------------------------------------------------------|--------------------------------------------------------------------------------------------------------------------|
| SIREN-C3PO<br><br>NCT04355767<br><br>Government Academic<br><br>Some concerns                                                                         | U.S.<br><br>15<br><br>B.1.1.7 (alpha): NR<br>B.1.617.2 (delta): NR                           | Previous SARS-CoV-2 infection: NR<br><br>Presence and/or duration of symptoms: onset of symptoms within 7 days before enrollment<br><br>Disease severity: NR<br><br>Pregnant women: Eligible | Convalescent plasma 250 ml<br><br>G2: 254<br>Placebo                       | G2: 54 (40–62)<br><br>female (%):<br>G1: 53<br>G2: 55<br><br>Ethnicity (%):<br>Non-white:<br>G1: 33<br>G2: 35<br><br>Diagnostic tool:<br>RT-PCR                 | Duration of symptoms:<br>G1 (Median (IQR)): 4 (2–5)<br>G2 (Median (IQR)): 3 (2–5)<br><br>Proportion of participants with previous infections:<br>NR<br><br>Time (days) since previous infection:<br>NR<br><br>Proportion of vaccinated participants:<br>NA<br><br>Disease severity (%):<br>NR<br><br>Currently pregnant (%):<br>G1: 1.2%<br>G2: 1.2% | Symptom duration (time until symptom free):<br>NR<br><br>All-cause mortality:<br>At 30 days:<br>G1: 5/257 (2)<br>G2: 1/254 (0.4)<br>(risk difference (95% CI), –1.6 % point; –4.2 to 0.50);<br><br>COVID-19 specific mortality:<br>NR<br><br>Hospitalization due to COVID-19:<br>G1: 46/257 (18)<br>G2: 56/254 (22)<br>P=NR | Serious AE:<br>At 30 days:<br>G1: 3/257 (1)<br>G2: 0/254 (0)<br>p=NR                                               |
| Libster et al. 2021 (24)<br><br>NR<br><br>NCT04479163<br><br>Government Industry Foundation/non-profit professional organization<br><br>Some concerns | RCT (double-blinded),<br><br>Argentina<br><br>15<br><br>P.1 (gamma): NR<br>C.37 (lambda): NR | COVID-19 vaccine received: NR<br><br>Previous SARS-CoV-2 infection: NR<br><br>Presence and/or duration of symptoms at least one Covid-19 related symptom for less than 48 hours              | N=160<br><br>G1: 80<br>Convalescent plasma 250 ml<br><br>G2: 80<br>Placebo | Age, years, mean (SD):<br>G1: 76.4 (8.7)<br>G2: 77.9 (8.4)<br><br>female (%):<br>G1: 68<br>G2: 58<br><br>Ethnicity (%):<br>NR<br><br>Diagnostic tool:<br>RT-PCR | Proportion of symptomatic participants (%):<br>G1: 100<br>G2: 100<br><br>Duration of symptoms:<br>NR<br><br>Proportion of participants with previous infections:<br>NR<br><br>Time (days) since previous infection:<br>NR<br><br>Proportion of vaccinated participants:                                                                              | Recovery <sup>†</sup> :<br>NR<br><br>Symptom duration (time until symptom free):<br>NR<br><br>All-cause mortality:<br>At 15 days:<br>G1: 2/80 (2)<br>G2: 4/80 (5)<br><br>COVID-19 specific mortality:<br>At 15 days:<br>G1: 2/80 (2)                                                                                        | Any AE:<br>NR<br><br>Serious AE:<br>At 15 days:<br>G1: 7/80 (9)<br>G2: 12/80 (15)<br>RR (95% CI): 0.58 (0.24–1.41) |

| Author, Year, Trial Name, Trial Registry No. Funding Risk of bias                                                                                           | Design, Country, Duration (days) Dominant variant at time of study (%)*                          | Eligibility criteria                                                                                                                                                                                                                 | N total (randomized), Interventions, N group                                  | Population                                                                                                                                                                                                   | Baseline characteristics                                                                                                                                                                                                                                                                                                                                                                                                                                | Recovery, symptom duration, all-cause mortality, COVID-19 specific mortality, Hospitalization due to COVID-19 (n/N (%))                                                                                                                                                                                                                                                                                                  | Incidence of any adverse events, incidence of serious adverse events (n/N (%))                                                                                                                                                          |
|-------------------------------------------------------------------------------------------------------------------------------------------------------------|--------------------------------------------------------------------------------------------------|--------------------------------------------------------------------------------------------------------------------------------------------------------------------------------------------------------------------------------------|-------------------------------------------------------------------------------|--------------------------------------------------------------------------------------------------------------------------------------------------------------------------------------------------------------|---------------------------------------------------------------------------------------------------------------------------------------------------------------------------------------------------------------------------------------------------------------------------------------------------------------------------------------------------------------------------------------------------------------------------------------------------------|--------------------------------------------------------------------------------------------------------------------------------------------------------------------------------------------------------------------------------------------------------------------------------------------------------------------------------------------------------------------------------------------------------------------------|-----------------------------------------------------------------------------------------------------------------------------------------------------------------------------------------------------------------------------------------|
|                                                                                                                                                             |                                                                                                  | Disease severity: mild<br><br>Pregnant women: Not eligible                                                                                                                                                                           |                                                                               |                                                                                                                                                                                                              | G1: 0<br>G2: 0<br><br>Disease severity (%):<br>Mild:<br>G1: 100<br>G2: 100<br><br>Currently pregnant (%):<br>NA                                                                                                                                                                                                                                                                                                                                         | G2: 4/80 (5)<br><br>Hospitalization due to COVID-19:<br>NR                                                                                                                                                                                                                                                                                                                                                               |                                                                                                                                                                                                                                         |
| Sullivan et al. 2022 (46)<br><br>CSSC-004<br><br>NCT04373460<br><br>Government Industry Academic Foundation/non-profit professional organization<br><br>Low | RCT (double-blinded),<br><br>U.S.,<br><br>28<br><br>B.1.1.7 (alpha): NR<br>B.1.617.2 (delta): NR | COVID-19 vaccine received: Eligible<br><br>Previous SARS-CoV-2 infection: NR<br><br>Presence and/or duration of symptoms: symptom onset within 8 days before transfusion<br><br>Disease severity: NR<br><br>Pregnant women: Eligible | N=1225<br><br>G1: 610<br>Convalescent plasma 250 ml<br><br>G2: 615<br>Placebo | Age, years, Median (IQR)<br>G1: 42 (32 - 54)<br>G2: 44 (33 - 55)<br><br>female (%):<br>G1: 55<br>G2: 60<br><br>Ethnicity (%):<br>Non-white:<br>G1: 22<br>G2: 19<br><br>Diagnostic tool:<br>RT-PCR or antigen | Proportion of symptomatic participants (%):<br>G1: 100<br>G2: 100<br><br>Duration of symptoms: Median symptom duration before randomization (IQR) - days:<br>G1: 5 (4-7)<br>G2: 5 (4-7)<br><br>Proportion of participants with previous infections:<br>NR<br><br>Time (days) since previous infection:<br>NR<br><br>Proportion of vaccinated participants: Partially vaccinated (%):<br>G1: 5<br>G2: 5<br><br>Fully vaccinated (%):<br>G1: 12<br>G2: 13 | Recovery <sup>†</sup> :<br>NR<br><br>Symptom duration (time until symptom free):<br>NR<br><br>All-cause mortality:<br>At 28 days:<br>G1: 0/592 (0)<br>G2: 3/589 (1)<br>p=NR<br><br>COVID-19 specific mortality:<br>At 28 days:<br>G1: 0/592 (0)<br>G2: 3/589 (1)<br>p=NR<br><br>Hospitalization due to COVID-19:<br>At 28 days:<br>G1: 17/592(3)<br>G2: 37/589 (6)<br>absolute risk reduction (95% CI), 3.4% points (1.0 | Any AE:<br>At 28 days:<br>Overall: 89/1181 (8)<br>G1: 34/592 (6)<br>G2: 55/589 (9)<br>Rate difference (95% CI) 0.18 (0.03, 0.32)<br><br>Serious AE:<br>G1: 2/592 (0.3)<br>G2: 0/589 (0)<br>Rate difference (95% CI) -0.05 (-0.11, 0.02) |

| Author, Year, Trial Name, Trial Registry No. Funding Risk of bias                                                                            | Design, Country, Duration (days) Dominant variant at time of study (%)*                    | Eligibility criteria                                                                                                                                                                                                       | N total (randomized), Interventions, N group                                                          | Population                                                                                                                                                                                     | Baseline characteristics                                                                                                                                                                                                                                                                                                                                                                   | Recovery, symptom duration, all-cause mortality, COVID-19 specific mortality, Hospitalization due to COVID-19 (n/N (%))                                                                                                                                                                                                                                                                                                    | Incidence of any adverse events, incidence of serious adverse events (n/N (%))                                                   |
|----------------------------------------------------------------------------------------------------------------------------------------------|--------------------------------------------------------------------------------------------|----------------------------------------------------------------------------------------------------------------------------------------------------------------------------------------------------------------------------|-------------------------------------------------------------------------------------------------------|------------------------------------------------------------------------------------------------------------------------------------------------------------------------------------------------|--------------------------------------------------------------------------------------------------------------------------------------------------------------------------------------------------------------------------------------------------------------------------------------------------------------------------------------------------------------------------------------------|----------------------------------------------------------------------------------------------------------------------------------------------------------------------------------------------------------------------------------------------------------------------------------------------------------------------------------------------------------------------------------------------------------------------------|----------------------------------------------------------------------------------------------------------------------------------|
|                                                                                                                                              |                                                                                            |                                                                                                                                                                                                                            |                                                                                                       |                                                                                                                                                                                                | Disease severity (%):<br>NR<br><br>Currently pregnant (%):<br>G1: 0.3%<br>G2: 0.2%                                                                                                                                                                                                                                                                                                         | to 5.8)                                                                                                                                                                                                                                                                                                                                                                                                                    |                                                                                                                                  |
| <b>Other drugs</b>                                                                                                                           |                                                                                            |                                                                                                                                                                                                                            |                                                                                                       |                                                                                                                                                                                                |                                                                                                                                                                                                                                                                                                                                                                                            |                                                                                                                                                                                                                                                                                                                                                                                                                            |                                                                                                                                  |
| Corticosteroids                                                                                                                              |                                                                                            |                                                                                                                                                                                                                            |                                                                                                       |                                                                                                                                                                                                |                                                                                                                                                                                                                                                                                                                                                                                            |                                                                                                                                                                                                                                                                                                                                                                                                                            |                                                                                                                                  |
| Ezer et al. 2021 (45)<br>CONTAIN<br>NCT04435795<br><br>Industry<br>Academic<br>Foundation/non-profit<br>professional organization<br><br>Low | RCT (double-blinded), Canada<br><br>14<br><br>B.1.1.7 (alpha): NR<br>B.1.617.2 (delta): NR | COVID-19 vaccine received: Not eligible<br><br>Previous SARS-CoV-2 infection: NR<br><br>Presence and/or duration of symptoms: at least one related symptom<br><br>Disease severity: NR<br><br>Pregnant women: Not eligible | N=215<br><br>G1: 108<br>Ciclesonide 1200 µg inhaled + 200 µg/day intranasal<br><br>G2: 107<br>placebo | Age, years, median (IQR):<br>G1: 35 (27-47)<br>G2: 35 (27-45)<br><br>female (%):<br>G1: 51<br>G2: 56<br><br>Ethnicity (%):<br>Non-white:<br>G1: 38<br>G2: 41<br><br>Diagnostic tool:<br>RT-PCR | Proportion of symptomatic participants (%):<br>G1: 100<br>G2: 100<br><br>Duration of symptoms: Median (IQR)<br>G1: 3 (2-4)<br>G2: 3 (2-4)<br><br>Proportion of participants with previous infections:<br>NR<br><br>Time (days) since previous infection:<br>NR<br><br>Proportion of vaccinated participants:<br>NA<br><br>Disease severity (%):<br>NR<br><br>Currently pregnant (%):<br>NA | Recovery <sup>†</sup> :<br>At 14 days:<br>G1: 69/105 (66)<br>G2: 57/98 (58)<br>Adjusted risk difference<br>7.5% (95% CI, -5.9% to 20.8%)<br><br>Symptom duration (time until symptom free):<br>NR<br><br>All-cause mortality:<br>At 14 days:<br>G1: 0/108 (0)<br>G2: 0/107 (0)<br><br>COVID-19 specific mortality:<br>At 14 days:<br>G1: 0/108 (0)<br>G2: 0/107 (0)<br><br>Hospitalization due to COVID-19:<br>At 14 days: | Any AE:<br>At 14 days:<br>G1: 23/105 (22)<br>G2: 15/98 (15)<br>p=NR<br><br>Serious AE:<br>G1: 7/106 (7)<br>G2: 5/103 (5)<br>p=NR |

| Author, Year, Trial Name, Trial Registry No. Funding Risk of bias                           | Design, Country, Duration (days) Dominant variant at time of study (%)* | Eligibility criteria                                                                                                                                                                                                                               | N total (randomized), Interventions, N group                             | Population                                                                                                                                                                            | Baseline characteristics                                                                                                                                                                                                                                                                                                                                                                                               | Recovery, symptom duration, all-cause mortality, COVID-19 specific mortality, Hospitalization due to COVID-19 (n/N (%))                                                                                                                                                                                                                             | Incidence of any adverse events, incidence of serious adverse events (n/N (%))                                                               |
|---------------------------------------------------------------------------------------------|-------------------------------------------------------------------------|----------------------------------------------------------------------------------------------------------------------------------------------------------------------------------------------------------------------------------------------------|--------------------------------------------------------------------------|---------------------------------------------------------------------------------------------------------------------------------------------------------------------------------------|------------------------------------------------------------------------------------------------------------------------------------------------------------------------------------------------------------------------------------------------------------------------------------------------------------------------------------------------------------------------------------------------------------------------|-----------------------------------------------------------------------------------------------------------------------------------------------------------------------------------------------------------------------------------------------------------------------------------------------------------------------------------------------------|----------------------------------------------------------------------------------------------------------------------------------------------|
|                                                                                             |                                                                         |                                                                                                                                                                                                                                                    |                                                                          |                                                                                                                                                                                       |                                                                                                                                                                                                                                                                                                                                                                                                                        | G1: 6/105 (6)<br>G2: 3/98 (3)<br>Adjusted risk difference (stratification on sex), % (95% CI): 2.3 (-3.0 to 7.6)                                                                                                                                                                                                                                    |                                                                                                                                              |
| Fluvoxamine                                                                                 |                                                                         |                                                                                                                                                                                                                                                    |                                                                          |                                                                                                                                                                                       |                                                                                                                                                                                                                                                                                                                                                                                                                        |                                                                                                                                                                                                                                                                                                                                                     |                                                                                                                                              |
| Lenze et al. 2020 (40)<br>STOP COVID<br>NCT04342663<br>Government Academic<br>Some concerns | RCT (double-blinded),<br>U.S.,<br>15<br>B.1.427 and B.1.429 (epsilon)   | COVID-19 vaccine received: NR<br>Previous SARS-CoV-2 infection: NR<br>Presence and/or duration of symptoms: symptomatic participants within 7 days of the first dose of study medication<br>Disease severity: mild<br>Pregnant women: Not eligible | N=181 (152 received)<br>G1: 80<br>Fluvoxamine 100mg<br>G2: 72<br>Placebo | Age, years, mean (SD):<br>Median<br>G1: 46<br>G2: 45<br><br>female (%):<br>G1: 70<br>G2: 74<br><br>Ethnicity (%):<br>Non-white:<br>G1: 30<br>G2: 31<br><br>Diagnostic tool:<br>RT-PCR | Proportion of symptomatic participants (%):<br>G1: 100<br>G2: 100<br><br>Duration of symptoms:<br>Median (IQR)<br>G1: 4 (3-5)<br>G2: 4 (3-5)<br><br>Proportion of participants with previous infections:<br>NR<br><br>Time (days) since previous infection:<br>NR<br><br>Proportion of vaccinated participants:<br>NR<br><br>Disease severity (%):<br>Mild:<br>G1: 100<br>G2: 100<br><br>Currently pregnant (%):<br>NR | Recovery <sup>†</sup> :<br>NR<br><br>Symptom duration (time until symptom free):<br>NR<br><br>All-cause mortality:<br>At 15 days:<br>G1: 0/80 (0)<br>G2: 0/72 (0)<br><br>COVID-19 specific mortality:<br>At 15 days:<br>G1: 0/80 (0)<br>G2: 0/72 (0)<br><br>Hospitalization due to COVID-19:<br>At 15 days:<br>G1: 0/80 (0)<br>G2: 4/72 (6)<br>p=NR | Any AE:<br>At 15 days:<br>G1: 12/80 (15)<br>G2: 11/72 (15)<br>p=NR<br><br>Serious AE:<br>At 15 days:<br>G1: 1/80 (1)<br>G2: 5/72 (7)<br>p=NR |
| Reis et al. 2022 (39)                                                                       | RCT (double-blinded),<br>Brazil                                         | COVID-19 vaccine received:<br>Not eligible                                                                                                                                                                                                         | N=1497<br>G1: 741                                                        | Age, years, median:<br>G1: 50                                                                                                                                                         | Proportion of symptomatic participants (%):<br>G1: 100                                                                                                                                                                                                                                                                                                                                                                 | Recovery <sup>†</sup> :<br>NR                                                                                                                                                                                                                                                                                                                       | Any AE:<br>NR                                                                                                                                |

| Author, Year, Trial Name, Trial Registry No. Funding Risk of bias                 | Design, Country, Duration (days) Dominant variant at time of study (%)*   | Eligibility criteria                                                                                                                                  | N total (randomized), Interventions, N group | Population                                                                                                                              | Baseline characteristics                                                                                                                                                                                                                                                                                                                                                                                                        | Recovery, symptom duration, all-cause mortality, COVID-19 specific mortality, Hospitalization due to COVID-19 (n/N (%))                                                                                                                                                                | Incidence of any adverse events, incidence of serious adverse events (n/N (%)) |
|-----------------------------------------------------------------------------------|---------------------------------------------------------------------------|-------------------------------------------------------------------------------------------------------------------------------------------------------|----------------------------------------------|-----------------------------------------------------------------------------------------------------------------------------------------|---------------------------------------------------------------------------------------------------------------------------------------------------------------------------------------------------------------------------------------------------------------------------------------------------------------------------------------------------------------------------------------------------------------------------------|----------------------------------------------------------------------------------------------------------------------------------------------------------------------------------------------------------------------------------------------------------------------------------------|--------------------------------------------------------------------------------|
| TOGETHER<br>NCT04727424<br>Foundation/non-profit professional organization<br>Low | 28<br>P.1 (gamma): NR<br>B.1.617.2 (delta): NR<br>B.1.1.529 (omicron): NR | Previous SARS-CoV-2 infection: NR<br>Presence and/or duration of symptoms: less than 8 days<br>Disease severity: mild<br>Pregnant women: Not eligible | Fluvoxamine 100mg<br>G2: 756<br>Placebo      | G2: 49<br><br>female (%):<br>G1: 55<br>G2: 60<br><br>Ethnicity (%):<br>Non-white:<br>G1: 99<br>G2: 99<br><br>Diagnostic tool:<br>RT-PCR | G2: 100<br><br>Duration of symptoms:<br>0-3 days (%):<br>G1: 44<br>G2: 41<br>4-7 days (%):<br>G1: 32<br>G2: 35<br>Unspecified (%):<br>G1: 23<br>G2: 24<br><br>Proportion of participants with previous infections:<br>NR<br><br>Time (days) since previous infection:<br>NR<br><br>Proportion of vaccinated participants:<br>NA<br><br>Disease severity (%):<br>Mild<br>G1: 100<br>G2: 100<br><br>Currently pregnant (%):<br>NA | Symptom duration (time until symptom free): NR<br><br>All-cause mortality:<br>At 28 days:<br>G1: 17/741 (2)<br>G2: 25/756 (3)<br>p=NR<br><br>COVID-19 specific mortality:<br>NR<br><br>Hospitalization due to COVID-19:<br>At 28 days:<br>G1: 75/741 (10)<br>G2: 97/756 (13)<br>p=0.10 | Serious AE: NR                                                                 |

\*<https://covariants.org/per-country>, <https://www.who.int/activities/tracking-SARS-CoV-2-variants>, †as defined by the authors; §not clearly defined, assumptions had to be made; \*\*G5 included G4; \*\*\*data not included in the MA due to underdosage of ivermectin

*Abbreviations:* AE= adverse events; CI= confidence interval; COVID-19= coronavirus disease; G (1,2,3,4,5)= group; IQR= interquartile range; kg= kilogram; mg= milligrams; HR= hazard ratio; N= number of participants; NCT= National Clinical Trial; NR= not reported; OR= odds ratio; PCR= polymerase chain reaction; RCT= randomized controlled trial; RR= risk ratio; SARSCoV-2= Severe acute respiratory syndrome coronavirus type 2; SD= standard deviation; SE= standard error; TSR= time from the first dose to sustained clinical recovery; UK= United Kingdom; US= United States; µg= microgram



## Supplement Table 7: Definitions for Recovery

| Author, Year                              | Definition of recovery                                                                          |
|-------------------------------------------|-------------------------------------------------------------------------------------------------|
| Oldenburg, 2021 (41)                      | Absence of symptoms                                                                             |
| Schwartz, 2021 (27)                       | Symptom resolution                                                                              |
| Ezer, 2021 (45)                           | Resolution of self-reported fever and all respiratory symptoms                                  |
| Vallejos, 2021 (47)                       | RT-PCR negative                                                                                 |
| Buonfrate, 2022 (48)                      | Clinical resolution                                                                             |
| Jayk Bernal, 2022 (33)<br>Reis, 2022 (49) | Changes in WHO Clinical Progression Scale (which measures the clinical progression of Covid-19) |
| Rosignol, 2022 (43)                       | Participant symptom improvement                                                                 |
| Streinu-Cercel, 2021 (34)                 | Absent or mild symptoms for at least 24 hours                                                   |
| Kim, 2021 (42)                            | Mild or absent reported symptoms for a minimum of 24 hours                                      |
| Gottlieb, 2021 (44)                       | Mild or absent symptoms                                                                         |

*Abbreviations:* Covid-19= coronavirus disease; RT-PCR= reverse transcription polymerase chain reaction; WHO= World Health Organization.

## Supplement Figure 1: Risk of Bias

| Study               | Risk of bias domains |    |    |    |    | Overall |
|---------------------|----------------------|----|----|----|----|---------|
|                     | D1                   | D2 | D3 | D4 | D5 |         |
| Alemany 2022        | +                    | +  | +  | +  | +  | +       |
| Buonfrate 2022      | +                    | -  | ⊗  | -  | -  | ⊗       |
| Chaccour 2021       | -                    | +  | +  | +  | +  | -       |
| Streinu-Cercel 2022 | +                    | +  | +  | +  | +  | +       |
| Ezer 2021           | +                    | +  | +  | +  | +  | +       |
| Fischer 2022        | +                    | +  | +  | +  | +  | +       |
| Gottlieb 2021       | -                    | +  | +  | +  | +  | -       |
| Gupta 2022          | +                    | +  | +  | +  | +  | +       |
| Hammond 2022        | +                    | -  | -  | +  | +  | -       |
| Jayk Bernal 2022    | +                    | +  | +  | +  | +  | +       |
| Kim 2021            | +                    | -  | +  | +  | +  | -       |
| Korley 2021         | +                    | -  | +  | +  | +  | -       |
| Lenze 2020          | +                    | +  | -  | +  | +  | -       |
| Libster 2021        | +                    | +  | +  | +  | -  | -       |
| López-Medina 2021   | +                    | -  | +  | +  | -  | -       |
| Oldenburg 2021      | +                    | +  | -  | +  | +  | -       |
| Omrani 2020         | +                    | +  | +  | +  | -  | -       |
| Reis 2021           | +                    | -  | -  | +  | +  | -       |
| Reis 2022a          | +                    | +  | +  | +  | +  | +       |
| Reis 2022b          | +                    | +  | -  | +  | +  | -       |
| Rocco 2021          | +                    | +  | -  | +  | -  | -       |
| Rosignol 2022       | +                    | +  | -  | +  | -  | -       |
| Schwartz 2021       | +                    | +  | +  | +  | -  | -       |
| Sullivan 2022       | +                    | +  | +  | +  | +  | +       |
| Vallejos 2021       | +                    | +  | +  | +  | +  | +       |
| Weinreich 2021      | +                    | +  | +  | +  | -  | -       |

Domains:

D1: Bias arising from the randomization process.  
 D2: Bias due to deviations from intended intervention.  
 D3: Bias due to missing outcome data.  
 D4: Bias in measurement of the outcome.  
 D5: Bias in selection of the reported result.

Judgement

⊗ High  
 - Some concerns  
 + Low



**Supplement Figures Summary Plots**

**Supplement Figure 2: All-Cause Mortality – Summary Plot**

**Supplement Figure 3: Serious Adverse Events – Summary Plot**

**Supplement Figures Meta Analyses**

**Supplement Figure 4: Serious Adverse Events: Molnupiravir Versus Placebo**

**Supplement Figure 5: Any Adverse Events: Molnupiravir Versus Placebo**

**Supplement Figure 6: Any Adverse Events: Regdanvimab Versus Placebo**

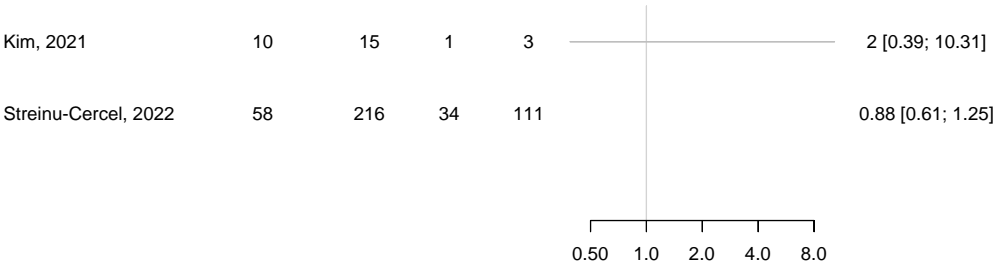

**Supplement Figure 7: Admission to Hospital due to COVID-19: Chloroquine Versus Placebo**

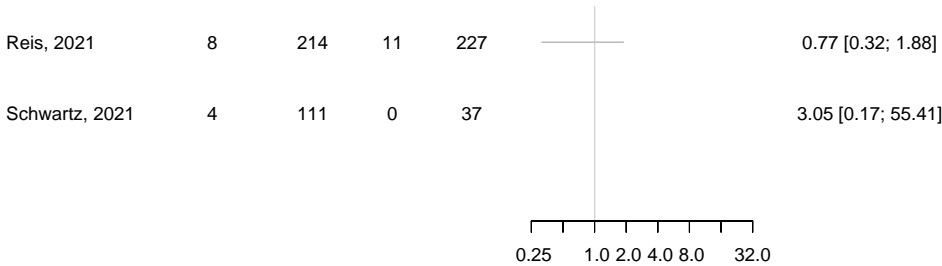

**Supplement Figure 8: Serious Adverse Events: Chloroquine Versus Placebo**

**Supplement Figure 9: All-Cause Mortality: Ivermectin Versus Placebo**

**Supplement Figure 10: Recovery: Ivermectin Versus Placebo**

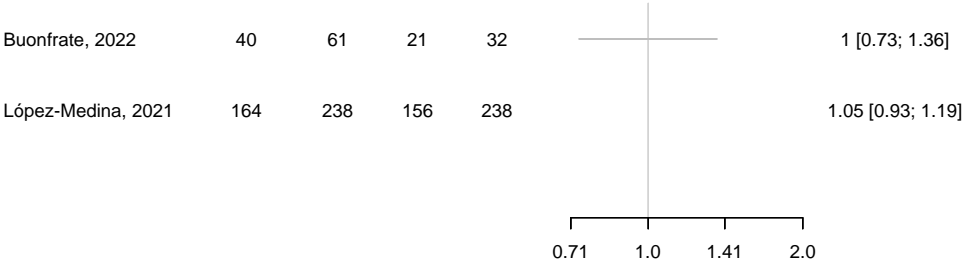

**Supplement Figure 71: Admission to Hospital due to COVID-19: Ivermectin Versus Placebo**

**Supplement Figure 8: Any Adverse Events: Ivermectin Versus Placebo**

**Supplement Figure 9: Admission to Hospital due to COVID-19: Nitazoxanide Versus Placebo**

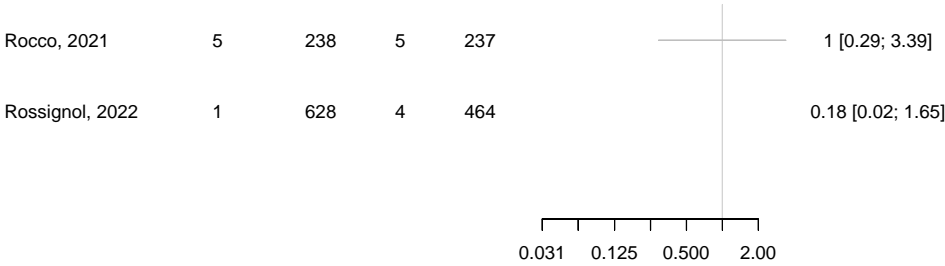

**Supplement Figure 104: Serious Adverse Events: Nitazoxanide Versus Placebo**

**Supplement Figure 11: Any Adverse Events: Nitazoxanide Versus Placebo**

**Supplement Figure 12: All-Cause Mortality: Convalescent Plasma Versus Placebo**

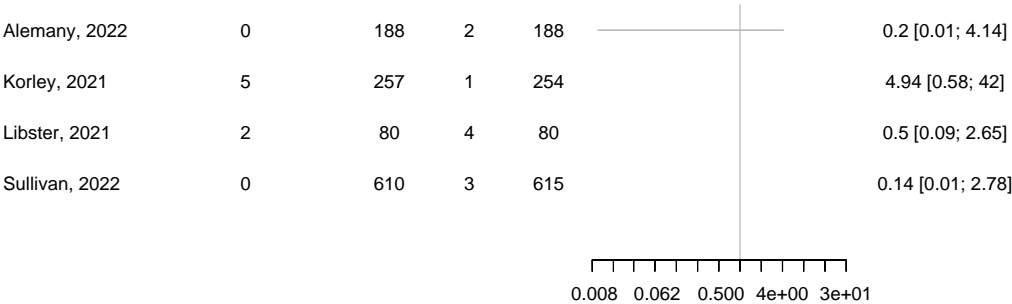

**Supplement Figure 13: Admission to Hospital due to COVID-19: Convalescent Plasma Versus Placebo**

**Supplement Figure 14: Serious Adverse Events: Convalescent Plasma Versus Placebo**

**Supplement Figure 19: All-Cause Mortality: Fluvoxamine Versus Placebo**

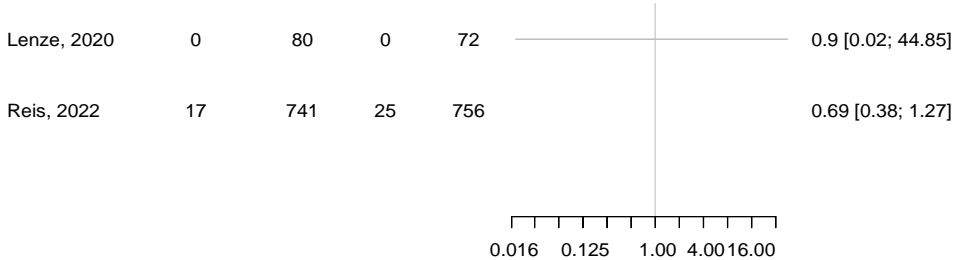

**Supplement Figure 20: Admission to Hospital due to COVID-19: Fluvoxamine Versus Placebo**









| + | + | + | + | + | + | + |
|---|---|---|---|---|---|---|
|   |   |   |   |   |   |   |
|   |   |   |   |   |   |   |
|   |   |   |   |   |   |   |











|                                                                                     |                                                                                     | ffect with placebo                                                                  | ffect with chloroquine/hydroxychloroquine                                           |                                                                                       |  |
|-------------------------------------------------------------------------------------|-------------------------------------------------------------------------------------|-------------------------------------------------------------------------------------|-------------------------------------------------------------------------------------|---------------------------------------------------------------------------------------|--|
|    |    |    |    |    |  |
|    |                                                                                     |                                                                                     |                                                                                     |                                                                                       |  |
|                                                                                     |                                                                                     |                                                                                     |                                                                                     |                                                                                       |  |
|                                                                                     |                                                                                     |                                                                                     |                                                                                     |                                                                                       |  |
|   |   |    |   |   |  |
|  |  |  |  |  |  |
|                                                                                     |                                                                                     |                                                                                     |                                                                                     |                                                                                       |  |
|                                                                                     |                                                                                     |                                                                                     |                                                                                     |                                                                                       |  |











|                                                                                   | -                                                                                 | -                                                                                 | -                                                                                 | -                                                                                   | - |  |
|-----------------------------------------------------------------------------------|-----------------------------------------------------------------------------------|-----------------------------------------------------------------------------------|-----------------------------------------------------------------------------------|-------------------------------------------------------------------------------------|---|--|
| 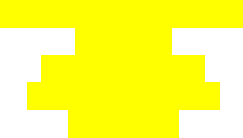 |  |  |  |  |   |  |
|                                                                                   |                                                                                   |                                                                                   |                                                                                   |                                                                                     |   |  |
|                                                                                   |                                                                                   |                                                                                   |                                                                                   |                                                                                     |   |  |
|                                                                                   |                                                                                   |                                                                                   |                                                                                   |                                                                                     |   |  |





## Supplement Table 9: Subgroup Results

| Author, Year                                        | Age                                                                                                                                                                                                                     | Gender                                                                                                                                                                                                               | Comorbidity                                                                                                                                                                                                                                                                                                                                                                                                                                                                                                                 | Other                                                                                                                                                                                                                                                                                                                                                                                                                                |
|-----------------------------------------------------|-------------------------------------------------------------------------------------------------------------------------------------------------------------------------------------------------------------------------|----------------------------------------------------------------------------------------------------------------------------------------------------------------------------------------------------------------------|-----------------------------------------------------------------------------------------------------------------------------------------------------------------------------------------------------------------------------------------------------------------------------------------------------------------------------------------------------------------------------------------------------------------------------------------------------------------------------------------------------------------------------|--------------------------------------------------------------------------------------------------------------------------------------------------------------------------------------------------------------------------------------------------------------------------------------------------------------------------------------------------------------------------------------------------------------------------------------|
| <b>Admission to hospitalization due to COVID-19</b> |                                                                                                                                                                                                                         |                                                                                                                                                                                                                      |                                                                                                                                                                                                                                                                                                                                                                                                                                                                                                                             |                                                                                                                                                                                                                                                                                                                                                                                                                                      |
| <i>Ivermectin</i>                                   |                                                                                                                                                                                                                         |                                                                                                                                                                                                                      |                                                                                                                                                                                                                                                                                                                                                                                                                                                                                                                             |                                                                                                                                                                                                                                                                                                                                                                                                                                      |
| Reis et al. 2022(49)                                | Age ≤50 yr:<br>G1: 38/335<br>G2: 39/347<br>RR 1.01 (95% CI 0.66 to 1.53)<br>Age >50 yr:<br>G1: 53/295<br>G2: 66/283<br>RR 0.77 (95% CI 0.56 to 1.06)                                                                    | Female:<br>G1:47/383<br>G2:59/408<br>RR (95% CI): 0.85 (0.59–1.21)<br>Male:<br>G1:53/296<br>G2:52/271<br>RR 0.93 (95% CI 0.66 to 1.32)                                                                               | Body-mass index <30:<br>G1: 38/345<br>G2: 48/333<br>RR 0.77 (95% CI 0.51 to 1.14)<br>Body-mass index ≥30:<br>G1:60/330<br>G2:63/339<br>RR 0.98 (95% CI 0.71 to 1.34)<br>Cardiovascular disease = Yes:<br>G1:47/282<br>G2:53/272<br>RR (95% CI): 0.86 (0.60–1.22)<br>Cardiovascular disease = No:<br>G1:53/397<br>G2:58/407<br>RR 0.94 (95% CI 0.66 to 1.32)<br>Lung disease = Yes:<br>G1:4/14<br>G2:5/14<br>RR 0.83 (95% CI 0.28 to 2.26)<br>Lung disease = No:<br>G1:96/665<br>G2:106/664<br>RR 0.90 (95% CI 0.70 to 1.17) | Smoking status = Current:<br>G1: 5/50<br>G2:5/59<br>RR 1.18 (0.38 to 3.63)<br>Smoking status = Former:<br>G1:15/94<br>G2:13/73<br>RR 0.89 (95% CI 0.46 to 1.75)<br>Smoking status = Never:<br>G1:80/535<br>G2:93/545<br>RR 0.88 (95% CI 0.67 to 1.15)<br>Time since onset of symptoms:<br>0–3 days:<br>G1: 41/282<br>G2:35/276<br>RR 1.14 (95% CI 0.76 to 1.74)<br>4–7 days:<br>G1:43/242<br>G2:43/241<br>95% CI 1.00 (0.68 to 1.46) |
| <i>Lopinavir/Ritonavir, Chloroquine</i>             |                                                                                                                                                                                                                         |                                                                                                                                                                                                                      |                                                                                                                                                                                                                                                                                                                                                                                                                                                                                                                             |                                                                                                                                                                                                                                                                                                                                                                                                                                      |
| Reis et al. 2021 (30)                               | Age <50<br>G1: 0/77 RR 0.13 (95% CI 0.01 to 2.54)<br>G2: 3/89 RR 0.81 (95% CI 0.17 to 3.89)<br>G3: 3/72<br>Age ≥=50<br>G1: 8/133 RR 1.13 (95% CI 0.44 to 2.92)<br>G2: 11/149 RR 1.38 (95% CI 0.57 to 3.34)<br>G3: 8/150 | Female<br>G1: 5/122 RR 1.24 (95% CI 0.24 to 4.51)<br>G2: 3/134 RR 1.83 (95% CI 0.45 to 7.50)<br>G3: 4/121<br>Male<br>G1: 3/92 RR 0.49 (95% CI 0.13 to 1.85)<br>G2: 11/110 RR 0.33 (95% CI 0.09 to 1.13)<br>G3: 7/106 | Diabetes = no<br>G1: 5/173 RR 0.58 (95% CI 0.20 to 1.69)<br>G2: 9/200 RR 0.90 (95% CI 0.37 to 2.22)<br>G3: 9/180<br>Diabetes = yes<br>G1: 3/40 RR 1.76 (95% CI 0.31 to 10.03)<br>G2: 5/43 RR 2.73 (95% CI 0.56 to 13.36)<br>G3: 2/47<br>Cardiac Disease = no<br>G1: 4/111 RR 1.06 (95% CI 0.27 to 4.15)<br>G2: 6/111 RR 1.59 (95% CI 0.46 to 5.50)<br>G3: 4/118<br>Cardiac Disease = yes<br>G1: 4/103 RR 0.60 (95% CI 0.18 to 2.00)<br>G2: 8/133 RR 0.94 (95% CI 0.35 to 2.50)<br>G3: 7/109                                 | Symptom Onset <120 hours<br>G1: 1/37 RR 3.24 (95% CI 0.14 to 77.01)<br>G2: 2/34 RR 5.86 (95% CI 0.29 to 117.86)<br>G3: 0/40<br>Symptom Onset ≥=120 hours<br>G1: 7/177 RR 0.67 (95% CI 0.27 to 1.70)<br>G2: 12/210 RR 0.97 (95% CI 0.44 to 2.25)<br>G3: 11/187                                                                                                                                                                        |

| Author, Year                  | Age                                                                                                                                                                                                   | Gender                                                                                                                                                                                                          | Comorbidity                                                                                                                                                                                                                                                                                                                                                                                                                                                                                                                                                       | Other                                                                                                                                                                                                                                                                                                                                                                                                                                                                                                                                                                                                                                                                                                                                     |
|-------------------------------|-------------------------------------------------------------------------------------------------------------------------------------------------------------------------------------------------------|-----------------------------------------------------------------------------------------------------------------------------------------------------------------------------------------------------------------|-------------------------------------------------------------------------------------------------------------------------------------------------------------------------------------------------------------------------------------------------------------------------------------------------------------------------------------------------------------------------------------------------------------------------------------------------------------------------------------------------------------------------------------------------------------------|-------------------------------------------------------------------------------------------------------------------------------------------------------------------------------------------------------------------------------------------------------------------------------------------------------------------------------------------------------------------------------------------------------------------------------------------------------------------------------------------------------------------------------------------------------------------------------------------------------------------------------------------------------------------------------------------------------------------------------------------|
|                               |                                                                                                                                                                                                       |                                                                                                                                                                                                                 | Lung Disease = no<br>G1: 8/190 RR 0.87 (95% CI 0.35 to 2.16)<br>G2: 13/229 RR 1.18 (95% CI 0.53 to 2.62)<br>G3: 10/207<br>Lung Disease = yes<br>G1: 0/24 RR 0.28 (95% CI 0.01 to 6.50)<br>G2: 1/15 RR 1.33 (95% CI 0.09 to 19.64)<br>G3: 1/20                                                                                                                                                                                                                                                                                                                     |                                                                                                                                                                                                                                                                                                                                                                                                                                                                                                                                                                                                                                                                                                                                           |
| <i>Molnupiravir</i>           |                                                                                                                                                                                                       |                                                                                                                                                                                                                 |                                                                                                                                                                                                                                                                                                                                                                                                                                                                                                                                                                   |                                                                                                                                                                                                                                                                                                                                                                                                                                                                                                                                                                                                                                                                                                                                           |
| Jayk Bernal et al. 2022 (33)  | Incidence of hospitalization or death:<br>At day 29:<br>>60 years:<br>G1: 12/118; G2: 16/127; ARR -2.4 (95% CI -10.6 to 5.8)<br>≤60 years:<br>G1: 36/591; G2: 52/572;<br>ARR(95% CI) -3.0 (-6.1, 0-0) | Incidence of hospitalization or death:<br>At day 29:<br>Female<br>G1: 16/379; G2: 27/344;<br>ARR(95% CI) -3.6 (95% CI -7.4 to -0.2)<br>Male<br>G1: 32/330; G2: 41/355;<br>ARR(95% CI) -1.9 (95% CI -6.5 to 2.8) | Incidence of hospitalization or death:<br>At day 29:<br>Obesity = yes<br>G1: 29/535; G2: 46/507; ARR -3.7 (95% CI -6.9 to -0.5)<br>Obesity = no<br>G1: 19/174; G2: 22/192; ARR -0.5 (95% CI -7.1 to 6.2)<br>Diabetes Mellitus = yes<br>G1: 17/107; G2: 17/117; ARR 1.4 (95% CI -8.2 to 11-1)<br>Diabetes Mellitus = no<br>G1: 31/602; G2: 51/582; ARR -3.6 (95% CI -6.6 to -0.7)<br>Serious Heart condition = yes<br>G1: 8/86; G2: 9/78; ARR -2.2 (95% CI -12.4 to 7-5)<br>Serious Heart condition = no<br>G1: 40/623; G2: 59/621; ARR -3.1 (95% CI -6.2 to -0.1) | Incidence of hospitalization or death:<br>At day 29:<br>Days since onset of symptoms = ≤3<br>G1: 25/339; G2: 28/335; ARR -1.0 (95% CI -5.2 to 3.2)<br>Days since onset of symptoms = >3<br>G1: 23/370; G2: 40/364; ARR -4.8 (95% CI -9.0 to -0.7)<br>Baseline Covid-19 severity = mild<br>G1: 19/395; G2: 27/376; ARR -2.4 (95% CI -5.9 to 1.0)<br>Baseline Covid-19 severity = moderate<br>G1: 29/311; G2: 40/321; ARR -3.1 (95% CI -8.1 to 1.8)<br>Variant = Gamma<br>G1: 0/37; G2: 9/47; ARR -19.1 (95% CI -32.6 to -8.9)<br>Variant = Delta<br>G1: 18/237; G2: 22/221; ARR -2.4 (95% CI -7.8 to 2.9)<br>Variant = Mu<br>G1: 6/75; G2: 13/82; ARR -7.9 (95% CI -18.5 to 2.6)<br>Other<br>G1: 5/47; G2: 7/38; ARR (95% CI -24.4 to 7.4) |
| <i>Nirmatrelvir/Ritonavir</i> |                                                                                                                                                                                                       |                                                                                                                                                                                                                 |                                                                                                                                                                                                                                                                                                                                                                                                                                                                                                                                                                   |                                                                                                                                                                                                                                                                                                                                                                                                                                                                                                                                                                                                                                                                                                                                           |
| Hammond et al. 2022 (35)      | At 28 days:<br><65 yr:<br>G1: 7/908; G2: 46/909 -4.35% difference (95% CI -5.91 to -2.79)<br>≥65 yr:<br>G1: 1/131; G2: 20/137 -13.93% difference (95% CI -20.07 to -7.80)                             | At 28 days:<br>Female<br>G1: 4/519; G2: 25/506; -4.23% difference (95% CI -6.29 to -2.17)<br>Male<br>G1: 4/520; G2: 41/540; -6.93% difference (95% CI -9.32 to -4.53)                                           | BMI = <25<br>G1: 1/209; G2: 9/207; -3.88% difference (95% CI -6.83 to -0.94)<br>BMI = 25 to <30<br>G1: 3/458; G2: 28/466; -5.44% difference (95% CI -0.75 to -3.13)<br>BMI = ≥30<br>G1: 4/371; G2: 29/373; -6.85% difference (95% CI -9.82 to -3.87)<br>Diabetes mellitus = yes<br>G1: 2/125; G2: 9/127; -5.51% difference (95% CI -10.51 to -0.52)<br>Diabetes mellitus = no<br>G1: 6/913; G2: 57/919; -5.63% difference (95% CI -7.30 to -3.96)<br>Number of comorbidities = 0-1                                                                                | At 28 days:<br>Time since symptom onset = ≤3 days<br>G1: 5/697; G2: 44/682; -5.81% difference (95% CI -7.78 to -3.84)<br>Time since symptom onset = >3 days<br>G1: 3/342; G2: 22/364; -5.23% difference (95% CI -7.91 to -2.55)                                                                                                                                                                                                                                                                                                                                                                                                                                                                                                           |

| Author, Year                    | Age                                                                                                                                                                                                   | Gender                                                                                                                                                                                          | Comorbidity                                                                                                                                                                                                                                                         | Other                                                                                                                                                                                                                                                                                                                                                                                                                        |
|---------------------------------|-------------------------------------------------------------------------------------------------------------------------------------------------------------------------------------------------------|-------------------------------------------------------------------------------------------------------------------------------------------------------------------------------------------------|---------------------------------------------------------------------------------------------------------------------------------------------------------------------------------------------------------------------------------------------------------------------|------------------------------------------------------------------------------------------------------------------------------------------------------------------------------------------------------------------------------------------------------------------------------------------------------------------------------------------------------------------------------------------------------------------------------|
|                                 |                                                                                                                                                                                                       |                                                                                                                                                                                                 | G1: 4/829; G2: 43/832; -4.76% difference (95% CI -6.37 to -3.16)<br>Number of comorbidities = 2-3:<br>G1: 4/206; G2: 23/211; -8.96% difference (95% CI -13.59 to -4.32)<br>Number of comorbidities = at least 4:<br>G1: 0/4; G2: 0/3; 0.00 (0.00 to 0.00)           |                                                                                                                                                                                                                                                                                                                                                                                                                              |
| <b>Regdanvimab</b>              |                                                                                                                                                                                                       |                                                                                                                                                                                                 |                                                                                                                                                                                                                                                                     |                                                                                                                                                                                                                                                                                                                                                                                                                              |
| Streinu-Cercel et al. 2021 (34) | NR                                                                                                                                                                                                    | NR                                                                                                                                                                                              | NR                                                                                                                                                                                                                                                                  | mild versus moderate disease severity at 28 days:<br>G1: 0/38 vs 4/62 (6.5%)<br><i>RR 0.18 (95% CI 0.01 to 3.24)</i><br>G2: 0/40 vs 5/63 (7.9%)<br><i>RR 0.14 (95% CI 0.01 to 2.50)</i><br>G3: 0/46 vs 9/57 (15.8%)<br><i>RR 0.06 (95% CI 0.004 to 1.09)</i><br><br>subgroup moderate severity: all treatments versus placebo at 28 days:<br>G1+G2: 9/125 (7.2%)<br>G3: 9/57 (15.8%)<br><i>RR 0.46 (95% CI 0.19 to 1.09)</i> |
| <b>Convalescent Plasma</b>      |                                                                                                                                                                                                       |                                                                                                                                                                                                 |                                                                                                                                                                                                                                                                     |                                                                                                                                                                                                                                                                                                                                                                                                                              |
| Sullivan et al. 2022 (46)       | NR                                                                                                                                                                                                    | Female<br>G1: 9/323 (3%)<br>G2: 21/352 (6%)<br>Male<br>G1: 8/269 (3%)<br>G2: 16/237 (7%)                                                                                                        | NR                                                                                                                                                                                                                                                                  | NR                                                                                                                                                                                                                                                                                                                                                                                                                           |
| <b>Fluvoxamine</b>              |                                                                                                                                                                                                       |                                                                                                                                                                                                 |                                                                                                                                                                                                                                                                     |                                                                                                                                                                                                                                                                                                                                                                                                                              |
| Reis et al. 2022 (39)           | Age: <=50<br>G1: 23/368 (6.3%)<br>G2: 41/379 (10.8%)<br>HR 0.57 (95% CI 0.34 to 0.95)<br>Age >50<br>G1: 50/327 (15.3%)<br>G2: 72/328 (22.0%)<br>HR 0.67 (95% CI 0.47 to 0.96)<br>p (interaction)=0.60 | Female<br>G1: 28/409 (6.8%)<br>G2: 61/453 (13.5%)<br>HR 0.49 (95% CI 0.31 to 0.77)<br>Male<br>G1: 51/376 (13.6%)<br>G2: 58/303 (19.1%)<br>HR 0.80 (95% CI 0.55 to 1.16)<br>p (interaction)=0.10 | BMI = <30<br>G1: 34/355 (9.6%)<br>G2: 52/373 (13.9%)<br>HR 0.67 (95% CI 0.44 to 1.03)<br>BMI = >30<br>G1: 44/376 (11.7%)<br>G2: 67/375 (17.9%)<br>HR 0.64 (95% CI 0.44 to 0.94)<br>p (interaction)=0.87<br>Cardiovascular disease = no<br>G1: 79/733<br>G2: 117/747 | Time from onset of symptoms = 0-3 days<br>G1: 30/328 (9.1%)<br>G2: 39/310 (12.6%)<br>HR 0.72 (95% CI 0.45 to 1.15)<br>Time from onset of symptoms = 4-7 days<br>G1: 31/239 (13.0%)<br>G2: 44/267 (16.5%)<br>HR 0.77 (95% CI 0.49 to 1.23)<br>p (interaction)=0.82                                                                                                                                                            |

| Author, Year                    | Age                                                                                                                                                                                             | Gender | Comorbidity                                                                                                                                                                                                                                                                                                                                                                                         | Other                                                                                                                                                                                    |
|---------------------------------|-------------------------------------------------------------------------------------------------------------------------------------------------------------------------------------------------|--------|-----------------------------------------------------------------------------------------------------------------------------------------------------------------------------------------------------------------------------------------------------------------------------------------------------------------------------------------------------------------------------------------------------|------------------------------------------------------------------------------------------------------------------------------------------------------------------------------------------|
|                                 |                                                                                                                                                                                                 |        | HR 0.67 (95% CI 0.45 to 1.00)<br>Cardiovascular disease = yes<br>G1: 0/4 (0%)<br>G2: 2/8 (25%)<br>HR 0.65 (95% CI 0.44 to 0.97)<br>p (interaction)=0.94<br>Chronic kidney disease = no<br>G1: 78/704 (11.1%)<br>G2: 115/702 (16.4%)<br>HR 0.66 (95% CI 0.50 to 0.88)<br>Chronic kidney disease = yes<br>G1: 1/35 (2.9%)<br>G2: 4/54 (7.4%)<br>HR 0.37 (95% CI 0.04 to 3.35)<br>p (interaction)=0.60 |                                                                                                                                                                                          |
| <b>Recovery</b>                 |                                                                                                                                                                                                 |        |                                                                                                                                                                                                                                                                                                                                                                                                     |                                                                                                                                                                                          |
| <b>Azithromycin</b>             |                                                                                                                                                                                                 |        |                                                                                                                                                                                                                                                                                                                                                                                                     |                                                                                                                                                                                          |
| Oldenburg et al. 2021 (41)      | absence of symptoms at 14 days:<br>Age <=60<br>G1: 61/121 (50%)<br>G2: 31/62 (50%)<br>RR 1.01 (95% 0.74 to 1.37)<br>Age >60<br>G1: 5/10 (50%)<br>G2: 4/8 (50%)<br>RR 1.00 (95% CI 0.39 to 2.53) | NR     | NR                                                                                                                                                                                                                                                                                                                                                                                                  | NR                                                                                                                                                                                       |
| <b>Time to recovery</b>         |                                                                                                                                                                                                 |        |                                                                                                                                                                                                                                                                                                                                                                                                     |                                                                                                                                                                                          |
| <b>Regdanvimab</b>              |                                                                                                                                                                                                 |        |                                                                                                                                                                                                                                                                                                                                                                                                     |                                                                                                                                                                                          |
| Streinu-Cercel et al. 2021 (34) |                                                                                                                                                                                                 |        |                                                                                                                                                                                                                                                                                                                                                                                                     | mild versus moderate disease severity at day 14:<br>median (95% CI)<br>G1: 4.4 (2.2–7.7) vs 5.7 (4.1–7.3)<br>G2: 5.5 (3.2–7.6) vs 7.3 (5.6–10.7)<br>G3: 6.9 (4.8–8.8) vs 10.8 (6.8–n.c.) |

BMI: Body Mass Index; RR: risk ratio; HR: hazard ratio; ARR: absolute risk reduction; CI: confidence interval; NR: not reported; G1: group 1; G2: group 2; G3: group 3

**Supplement Table 10: Studies Identified in First Surveillance Search (August 17, 2022)**

| <i>Author, Year</i><br><i>Risk of bias</i>     | <i>Population</i>                                                                                                                                                                                        | <i>N total (randomized),<br/>Interventions,<br/>N group</i>                                                        | <i>Outcomes<br/>(Follow-up Duration)</i>                                                                                                                                                                                                                                                                                                          | <i>Summary of Results</i>                                                                                   |
|------------------------------------------------|----------------------------------------------------------------------------------------------------------------------------------------------------------------------------------------------------------|--------------------------------------------------------------------------------------------------------------------|---------------------------------------------------------------------------------------------------------------------------------------------------------------------------------------------------------------------------------------------------------------------------------------------------------------------------------------------------|-------------------------------------------------------------------------------------------------------------|
| Biber, 2022 (50)<br><br>Some concerns          | Adults with molecular confirmation of COVID-19 by RT-PCR, who received results within the first 7 days from symptom onset. Asymptomatic cases were also included within 5 days from molecular diagnosis. | N=116<br><br>Ivermectin 12 or 15 mg: 57<br><br>Placebo: 59                                                         | <ul style="list-style-type: none"> <li>• Admission to hospital due to COVID-19</li> <li>• Incidence of adverse events</li> </ul><br>(14 days)                                                                                                                                                                                                     | No statistically significant difference was observed for the outcomes of interest between the two groups.   |
| Caraco, 2022 (51)<br><br>Low                   | Adults with mild or moderate, laboratory confirmed Covid-19 with onset of Covid-19 signs and/or symptoms up to (and including) 7 days before randomization.                                              | N=302<br><br>Molnupiravir 200mg: 75<br><br>Molnupiravir 400mg: 77<br><br>Molnupiravir 800mg: 76<br><br>Placebo: 74 | <ul style="list-style-type: none"> <li>• All-cause mortality</li> <li>• COVID-19-related mortality</li> <li>• Admission to hospital due to COVID-19</li> <li>• Incidence of adverse events</li> <li>• Incidence of serious adverse events</li> </ul><br>(29 days)                                                                                 | No statistically significantly difference was observed for the outcomes of interest between the two groups. |
| Mirahmadizadeh, 2022 (52)<br><br>Some concerns | Adults with mild symptomatic COVID-19 confirmed by RT-PCR test and symptom onset-to-visit interval of less than 48 h.                                                                                    | N=393<br><br>Ivermectin 12 mg: 131<br><br>Ivermectin 24 mg: 131<br><br>Placebo: 131                                | <ul style="list-style-type: none"> <li>• All-cause mortality</li> <li>• COVID-19-related mortality</li> <li>• Recovery</li> <li>• Symptom duration time until symptom free)</li> <li>• Admission to hospital due to COVID-19</li> <li>• Incidence of adverse events</li> <li>• Incidence of serious adverse events</li> </ul><br>(28 and 29 days) | No statistically significantly difference was observed for the outcomes of interest between the two groups. |

|                              |                                                                                                                                                                                                                                                                                                                              |                                                                |                                                                                                                                                                                                                                                         |                                                                                                                                                                                                                                                                                                                                                                                        |
|------------------------------|------------------------------------------------------------------------------------------------------------------------------------------------------------------------------------------------------------------------------------------------------------------------------------------------------------------------------|----------------------------------------------------------------|---------------------------------------------------------------------------------------------------------------------------------------------------------------------------------------------------------------------------------------------------------|----------------------------------------------------------------------------------------------------------------------------------------------------------------------------------------------------------------------------------------------------------------------------------------------------------------------------------------------------------------------------------------|
| Montgomery, 2022 (53)<br>Low | Adults with a documented laboratory-confirmed SARS-CoV-2 infection, as determined by RT-PCR or an antigen test from any respiratory tract specimen collected 3 days or less before enrolment (day 1), a WHO Clinical Progression Scale score of more than 1 to less than 4, and who had not received a COVID-19 vaccination. | N=910<br>Tixagevimab–cilgavimab<br>600 mg: 456<br>Placebo: 454 | <ul style="list-style-type: none"> <li>All-cause mortality</li> <li>COVID-19-related mortality</li> <li>Admission to hospital due to COVID-19</li> <li>Incidence of adverse events</li> <li>Incidence of serious adverse events</li> </ul><br>(29 days) | The incidence of COVID-19 deaths or progression to severe disease (RR 0.43; 95% CI 0.025 to 0.75). and incidence of adverse events (29% vs 36%; 0.81; 95% CI 0.67 to 0.98) were statistically significantly lower in the tixagevimab–cilgavimab group compared to placebo. There were three COVID-19-reported deaths in the tixagevimab–cilgavimab group and six in the placebo group. |
| Rezai, 2022 (54)<br>Low      | Patients, aged 5 years or more, weight more than 15 kg, with positive diagnostic by RT-PCR assay for SARS-CoV-2 using a nasopharyngeal swab ≤ 4 days prior to screening or positive rapid COVID-19 test, without evidence of viral pneumonia or hypoxia*.                                                                    | N=582<br>Ivermectin 6, 12, 18, 24 or 30 mg: 282<br>Placebo:300 | <ul style="list-style-type: none"> <li>All-cause mortality</li> <li>Recovery</li> <li>Admission to hospital due to COVID-19</li> <li>Incidence of adverse events</li> <li>Incidence of serious adverse events</li> </ul><br>(5 and 7 days)              | No statistically significant difference was observed for the outcomes of interest between the two groups.                                                                                                                                                                                                                                                                              |
| Seo, 2022 (55)<br>Low        | Adult patients with SARS-CoV-2 infection laboratory-confirmed by RT-PCR; patients with symptom onset less than 7 days after randomization and had positive RT-PCR results within 3 days of randomization were enrolled.                                                                                                      | N=52<br>Fluvoxamine 100 mg: 26<br>Placebo: 26                  | <ul style="list-style-type: none"> <li>Admission to hospital due to COVID-19</li> <li>Incidence of serious adverse events</li> </ul><br>(10 days)                                                                                                       | No statistically significant difference was observed for the outcomes of interest between the two groups.                                                                                                                                                                                                                                                                              |
