# Supplementary material
Source: PubMed Central journal article supplement (PMC9709728)
Supplement: aim-olf-M222202-M22-2202_Supplement2.pdf [file aim-olf-M222202-M22-2202_Supplement2.pdf]

# Outpatient Treatment of Confirmed COVID-19: A Living, Rapid Review for the American College of Physicians

Isolde Sommer, MSc, MPH, PhD; Andreea Dobrescu, MD, PhD; Dominic Ledinger, MSc, MPH; Isabel Moser, MD; Kylie Thaler, MD, MPH; Emma Persad, MD; Martin Fangmeyer, MScN; Robert Emprechtinger, MSc; Irma Klerings; and Gerald Gartlehner, MD, MPH

**Background:** Clinicians and patients want to know the benefits and harms of outpatient treatment options for SARS-CoV-2 infection.

**Purpose:** To assess the benefits and harms of 12 different COVID-19 treatments in the outpatient setting.

**Data Sources:** Epistemonikos COVID-19 L-OVE Platform, searched on 4 April 2022.

**Study Selection:** Two reviewers independently screened abstracts and full texts against a priori-defined criteria. Randomized controlled trials (RCTs) that compared COVID-19 treatments in adult outpatients with confirmed SARS-CoV-2 infection were included.

**Data Extraction:** One reviewer extracted data and assessed risk of bias and certainty of evidence (COE). A second reviewer verified data abstraction and assessments.

**Data Synthesis:** The 26 included studies collected data before the emergence of the Omicron variant. Nirmatrelvir-ritonavir and casirivimab-imdevimab probably reduced hospitalizations (1% vs. 6% [1 RCT] and 1% vs. 4% [1 RCT], respectively; moderate COE). Nirmatrelvir-ritonavir probably reduced all-cause mortality (0% vs. 1% [1 RCT]; moderate

COE), and regdanvimab probably improved recovery (87% vs. 72% [1 RCT]; moderate COE). Casirivimab-imdevimab reduced time to recovery by a median difference of 4 days (10 vs. 14 median days [1 RCT]; high COE). Molnupiravir may reduce all-cause mortality, sotrovimab may reduce hospitalization, and remdesivir may improve recovery (low COE). Lopinavir-ritonavir and azithromycin may have increased harms, and hydroxychloroquine may result in lower recovery rates (low COE). Other treatments had insufficient evidence or no statistical difference in efficacy and safety versus placebo.

**Limitation:** Many outcomes had few events and small samples.

**Conclusion:** Some antiviral medications and monoclonal antibodies may improve outcomes for outpatients with mild to moderate COVID-19. However, the generalizability of the findings to the currently dominant Omicron variant is limited.

**Primary Funding Source:** American College of Physicians. (PROSPERO: CRD42022323440)

*Ann Intern Med.* 2023;176:92-104. doi:10.7326/M22-2202 **Annals.org**  
For author, article, and disclosure information, see end of text.  
This article was published at Annals.org on 29 November 2022.

In the United States, COVID-19 has resulted in more than 1 million deaths (1) and led to a decrease in life expectancy of 1.87 years (2). Various pharmacologic therapies, including antiviral drugs, corticosteroids, and other repurposed medications, have emerged as treatment options for outpatients with COVID-19.

Several reviews have systematically assessed the efficacy and safety of these therapies (3-10). However, given the pace of the pandemic and the emerging evidence, without regular updates these reviews quickly become outdated. In addition, most included both inpatient and outpatient management and focused only on 1 specific COVID-19 treatment. The aim of this living, rapid review was to systematically collate and assess the evidence regarding the benefits and harms of COVID-19 treatments

of interest to support the American College of Physicians (ACP) Scientific Medical Policy Committee (SMPC) in developing practice points on the use of COVID-19 treatments in adult outpatients.

## METHODS

We conducted this living, rapid review in accordance with the Cochrane Rapid Reviews Methods Group guidance (11). We registered our protocol in PROSPERO (CRD42022323440) and made no changes to it. Throughout this review, we adhered to the PRISMA (Preferred Reporting Items for Systematic reviews and Meta-Analyses) statement (12).

Our methods differed from those of a systematic review in the following ways: We searched only 1 electronic database (the Epistemonikos COVID-19 L-OVE Platform [13]), and single reviewers extracted data and rated risk of bias and certainty of evidence (COE); a second, senior investigator verified data abstraction and assessments.

We plan to conduct monthly surveillance searches over a period of 1 year for new randomized controlled trials (RCTs). The study eligibility criteria might be revised if the treatments of interest change. The methodological approach will remain the same. The SMPC is planning to maintain this topic as living, rapid practice points with

### See also:

|                                |      |
|--------------------------------|------|
| Editorial comment . . . . .    | 137  |
| Related article . . . . .      | 115  |
| Summary for Patients . . . . . | I-24 |

### Web-Only

|                      |  |
|----------------------|--|
| Supplement           |  |
| Annals Video Summary |  |

literature surveillance and periodic updating of the living, rapid review and SMPC practice points. Details of the practice points' living process, including signals for updating and retirement, can be found in ACP's methods articles (14).

### Research Questions and Eligibility Criteria

We addressed the following key questions (KQs):

**KQ:** What are the benefits and harms of COVID-19 treatments in symptomatic and asymptomatic adult patients with a confirmed SARS-CoV-2 infection in the outpatient setting?

**KQa:** Do the benefits and harms vary by patient characteristics (age, gender, or comorbid conditions), type of SARS-CoV-2 variant, immunity status (prior SARS-CoV-2 infection, vaccination status, or time since infection or vaccination), symptom duration, or disease severity?

We considered RCTs that included adult outpatients with a confirmed diagnosis of SARS-CoV-2 infection and were published in English. Treatments of interest included antiviral drugs, neutralizing monoclonal antibodies, antibiotic or antiparasitic drugs, convalescent plasma, corticosteroids, and fluvoxamine. Comparators were placebo to determine treatment efficacy or standard of care if no placebo-controlled trials were available, which was not the case for any of the treatments of interest.

The ACP SMPC selected all-cause mortality, COVID-19-specific mortality, recovery, time to recovery, hospitalization due to COVID-19, and incidences of serious or any adverse events as critical outcomes for decision making. **Supplement Table 1** (available at [Annals.org](#)) presents the a priori-specified inclusion and exclusion criteria.

### Data Sources and Searches

An experienced information specialist (I.K.) searched Epistemonikos COVID-19 L-OVE, a free-access repository and classification platform for COVID-19 evidence (13), up to 4 April 2022 (**Supplement Table 2**, available at [Annals.org](#)). In addition, we searched the COVID-NMA initiative website, a living evidence database of COVID-19 trials (15). On 17 August 2022, a surveillance search was conducted to identify studies to be included in periodic updating of the living, rapid review and SMPC practice points.

### Study Selection

Two trained reviewers (from among I.S., A.D., D.L., I.M., E.P., K.T., and G.G.) independently screened titles, abstracts, and relevant full-text articles against predefined eligibility criteria using DistillerSR (Evidence Partners). Conflicts were resolved by discussion or by consulting a third reviewer. All results were tracked in an EndNote 20 database (Clarivate).

### Data Extraction and Quality Assessment

One reviewer (I.S., A.D., D.L., I.M., E.P., or K.T.) abstracted characteristics of the study populations, settings, interventions, comparators, methods, and results from each included study. A second reviewer (I.S., A.D., D.L., I.M., E.P., or K.T.) checked all data abstractions for completeness and accuracy.

A single investigator assessed the risk of bias of the included RCTs using the Cochrane Risk of Bias Tool 2.0 (16). We validated the ratings against the risk-of-bias assessments provided by COVID-NMA, which had applied the same tool (15). If the ratings differed, we involved a second investigator to resolve the discrepancy. For trials that were not included in the COVID-NMA database, we dually assessed the risk of bias. **Supplement Figure 1** (available at [Annals.org](#)) presents the risk-of-bias assessments.

### Data Synthesis and Analysis

If we found 2 or more similar studies for a comparison of interest, we conducted meta-analyses. We chose the Bayesian random-effects model because it allows us to update the analyses without concern for *P* value inflation (17, 18). We conducted all analyses with R, version 4.1.3 (19), using the bayesmeta (20) and metafor (21) packages. We chose noninformative priors for both the treatment effect (mean, 0; SD, 4) and the heterogeneity (half-normal with a scale of 0.5). The results were calculated as risk ratios (RRs) and presented as forest plots.

We determined the appropriateness of a meta-analysis by assessing the clinical and methodological heterogeneity following established guidance (22). Although we used an intention-to-treat-analysis for data we pooled in a meta-analysis, we relied on the data as reported in the individual studies for the narrative summary. When possible, we conducted sensitivity analysis to explore potential sources of heterogeneity. Although we had planned to perform subgroup analyses, we were unable to identify enough studies to do so.

### Certainty of Evidence

We graded the COE on the basis of the guidance established by the GRADE (Grading of Recommendations Assessment, Development and Evaluation) Working Group (23). A single investigator assessed the COE for each key outcome, and a second senior investigator checked this for plausibility and consistency.

### Role of the Funding Source

This living, rapid review was funded by ACP, which assisted in the development of the KQs and study inclusion criteria and selection of the outcomes of interest. The ACP was not involved in data collection, analysis, or manuscript preparation.

## RESULTS

The searches yielded 679 references, from which we included 26 RCTs (24–49). **Figure 1** shows the study selection process. **Supplement Tables 3 to 5** (available at [Annals.org](#)) list eligible preprints, ongoing studies, and other excluded studies with the reasons for exclusion.

### Study and Participant Characteristics

The number of participants in the included studies ranged from 18 to 5607. The median ages of participants varied from 26 to 77 years, and the proportion of females varied between 1% and 72%. Trials were conducted in the United States (31, 36, 40, 41, 43, 46), Canada (27,

**Figure 1.** PRISMA (Preferred Reporting Items for Systematic reviews and Meta-Analyses) flowchart.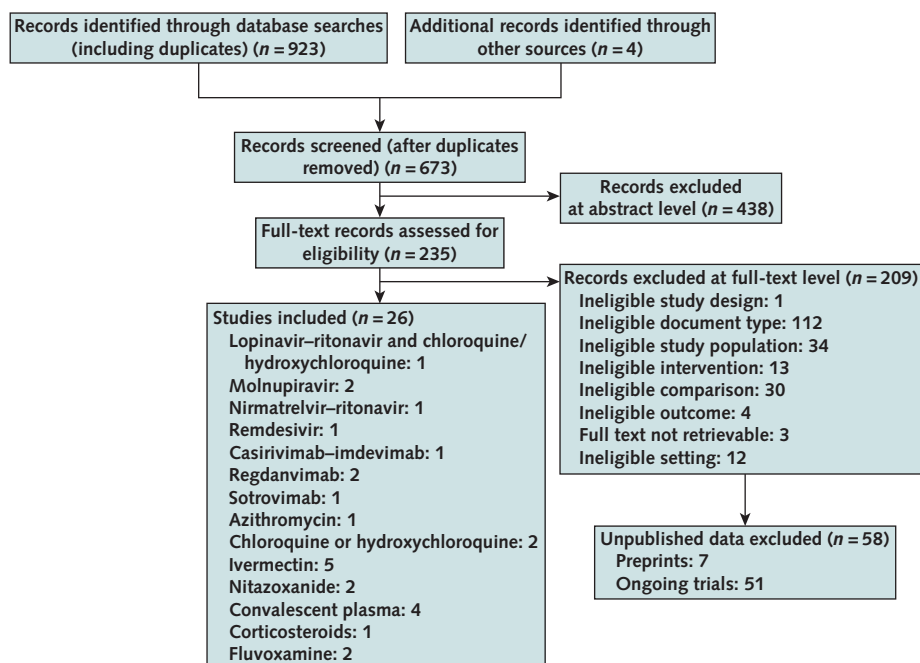

45), Argentina (24, 47), Brazil (30, 32, 39, 49), Colombia (26), Spain (29, 37), Italy (48), the Middle East (28), or multiple countries (25, 33–35, 38, 42, 44). Out of 26 trials, 16 were funded with industry involvement (24, 25, 27, 31, 33–35, 37, 38, 41–46, 48). Among studies reporting vaccination status as an eligibility criterion, 11 studies (44%) (25, 28, 31, 33–37, 39, 44, 45) excluded vaccinated participants, and 4 studies (12%) included them (42, 43, 46, 49). Five studies excluded participants who had previously been diagnosed with COVID-19 (35, 37, 42, 43, 46); 1 study included them only if they had not been hospitalized or treated (44). All studies were conducted before the Omicron variant became the dominant strain.

Participants were symptomatic across studies except in 1 study that included both symptomatic and asymptomatic participants (41). Ten studies (24, 26, 30, 32, 34, 37, 39, 40, 42, 43) provided data on disease severity; in 6 of them, participants had only mild symptoms (24, 26, 30, 32, 39, 40, 42). In all studies, the SARS-CoV-2 infection status was confirmed by a diagnostic test, usually a reverse transcriptase polymerase chain reaction test; 7 studies (26, 34, 37, 38, 41, 46, 49) also accepted antigen tests. **Supplement Table 6** (available at [Annals.org](#)) presents the characteristics and results of the included studies; **Supplement Table 7** (available at [Annals.org](#)) lists the definitions of “recovery” that were used in the included studies.

We rated 9 studies as having low risk of bias (31, 33, 34, 37–39, 45–47), 16 as having some bias concerns (24–30, 32, 35, 36, 40–44, 49), and 1 as having high risk of bias (48). The risk-of-bias ratings of 8 studies differed from those in the COVID-NMA database (15) and required the involvement of a second reviewer. We dually

assessed the risk of bias of 2 studies (42, 49) that were not available in the COVID-NMA database. Risk of bias included possible reporting bias, unclear blinding, lack of information on randomization and allocation concealment, or lack of an intention-to-treat analysis (**Supplement Figure 1**).

## Efficacy and Risk for Harms of COVID-19 Treatments

Overall, only nirmatrelvir-ritonavir, casirivimab-imdevimab, and sotrovimab reduced hospitalizations due to COVID-19 compared with placebo (**Figure 2**). Lopinavir-ritonavir and azithromycin led to higher incidence of adverse events than placebo (**Figure 3**). Molnupiravir and nirmatrelvir-ritonavir reduced all-cause mortality (**Supplement Figure 2**, available at [Annals.org](#)). Nirmatrelvir-ritonavir, remdesivir, casirivimab-imdevimab, and sotrovimab reduced the incidence of serious adverse events (**Supplement Figure 3**, available at [Annals.org](#)).

The **Table** summarizes results and COE ratings for each treatment versus placebo. **Supplement Figures 4 to 19** (available at [Annals.org](#)) display meta-analyses, and **Supplement Table 8** (available at [Annals.org](#)) presents summary-of-findings tables.

### Antiviral Drugs

**Lopinavir–Ritonavir.** One RCT ( $n = 471$ ; some risk of bias) assessed 800 mg of lopinavir and 200 mg of ritonavir at the first 2 intakes, followed by 400 mg of lopinavir and 100 mg of ritonavir for the next 9 days, compared with placebo (30). Lopinavir-ritonavir may have no effect on hospitalization due to COVID-19 (5.6% vs. 4.8%; hazard ratio, 1.16 [95% confidence interval {CI}, 0.53 to 2.56]; low COE) but may increase the incidence of adverse events

(39.7% vs. 20.9%; RR, 1.90 [CI, 1.40 to 2.57]; low COE). Although larger, the difference in serious adverse events between lopinavir-ritonavir and placebo was not statistically significant (8.6% vs. 5.5%; RR, 1.58 [CI, 0.79 to 3.16]; low COE). The evidence for all-cause mortality was insufficient to draw conclusions.

**Molnupiravir.** Two RCTs ( $n = 1637$ ; low risk of bias) assessed molnupiravir, 800 mg (31, 33) or 200 to 800 mg (31), compared with placebo.

The MOVE-OUT study (33) reported a reduction in all-cause mortality (which corresponded to COVID-19-related mortality as all deaths were due to COVID-19) ( $<0.1\%$  vs.  $1.3\%$ ; RR, 0.11 [CI, 0.01 to 0.86]; low COE) with molnupiravir and no effect on hospitalization due to COVID-19 ( $6.2\%$  vs.  $7.9\%$ ; RR, 0.79 [CI, 0.54 to 1.16]; low

COE). Molnupiravir at doses of 200, 400, or 800 mg probably results in similar recovery ( $48.4\%$  vs.  $48.3\%$ ; odds ratio, 1.04 [CI, 0.84 to 1.29]; 1 RCT; moderate COE) (31, 33) and time to recovery (median, 5.5 to 9.0 vs. 8.5 days; 1 RCT; low COE) compared with placebo (31, 33). The proportion of participants affected by serious or any adverse events in the 2 studies did not differ statistically between groups (serious adverse events:  $6.1\%$  vs.  $8.7\%$ ; RR, 0.77 [95% credible interval {CrI}, 0.32 to 2.03]; low COE [Supplement Figure 4]; any adverse events:  $30.1\%$  vs.  $32.0\%$ ; RR, 0.96 [CrI, 0.55 to 1.73]; moderate COE [Supplement Figure 5]).

**Nirmatrelvir-Ritonavir.** One RCT ( $n = 2246$ ; some risk of bias) assessed nirmatrelvir-ritonavir (300 and 100 mg) every 12 hours for 5 days compared with placebo (35).

Figure 2. Summary plot of hospitalization due to COVID-19.

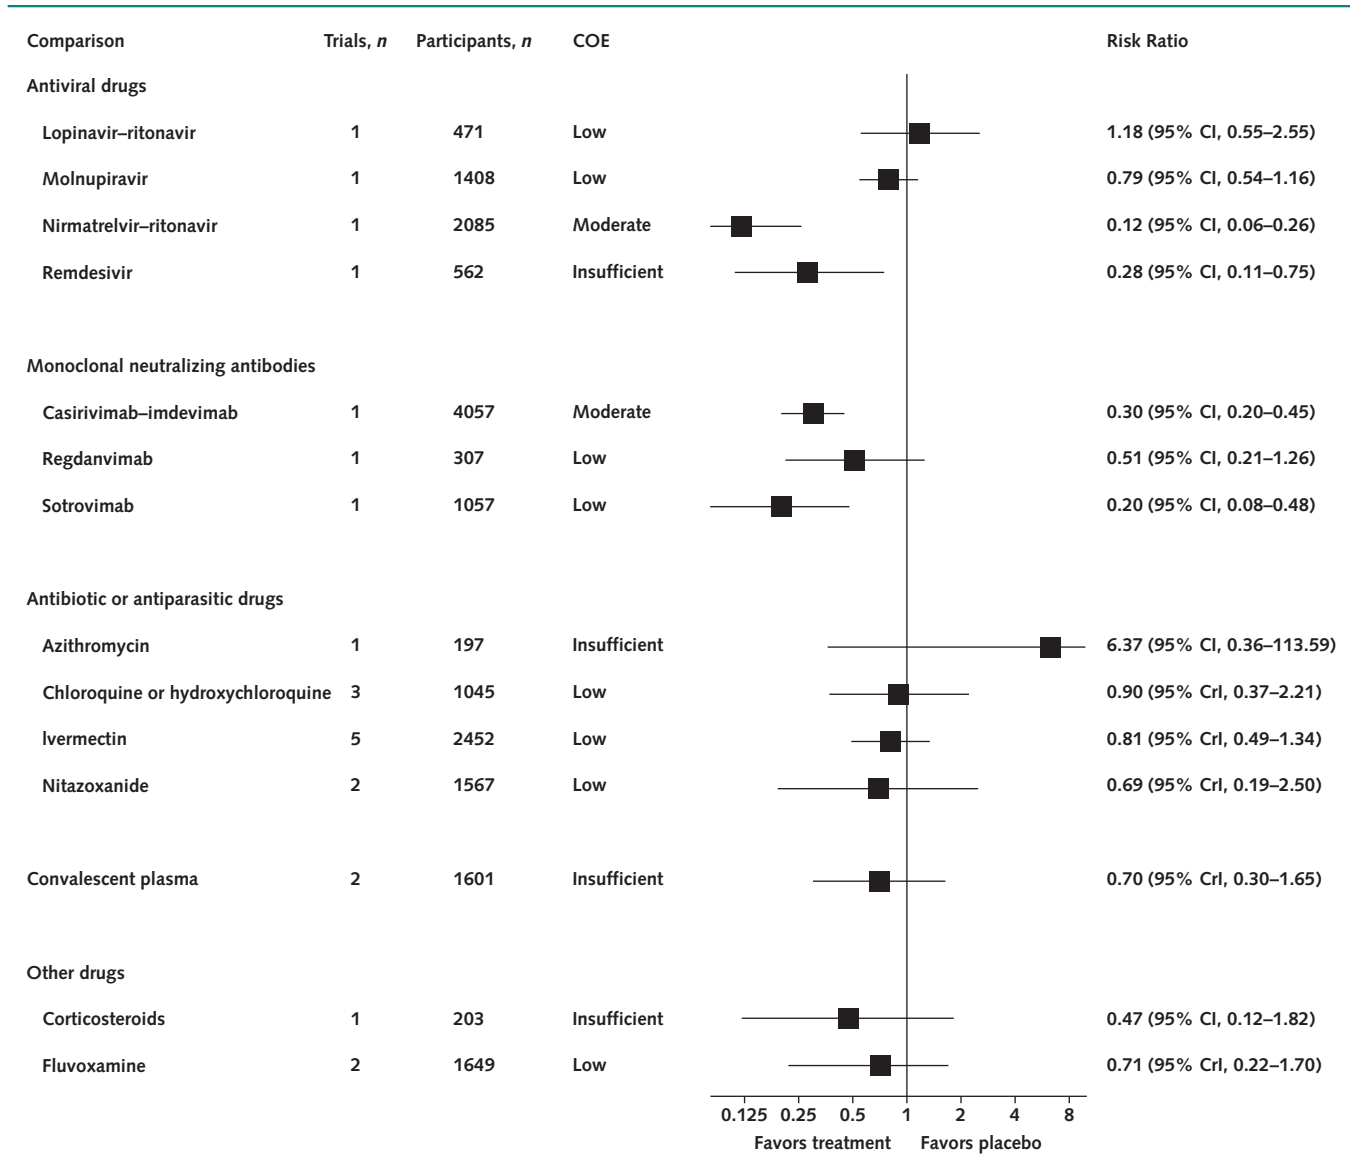

The risk ratios were self-calculated. CI = confidence interval; COE = certainty of evidence; CrI = credible interval.

Figure 3. Summary plot of incidence of adverse events.

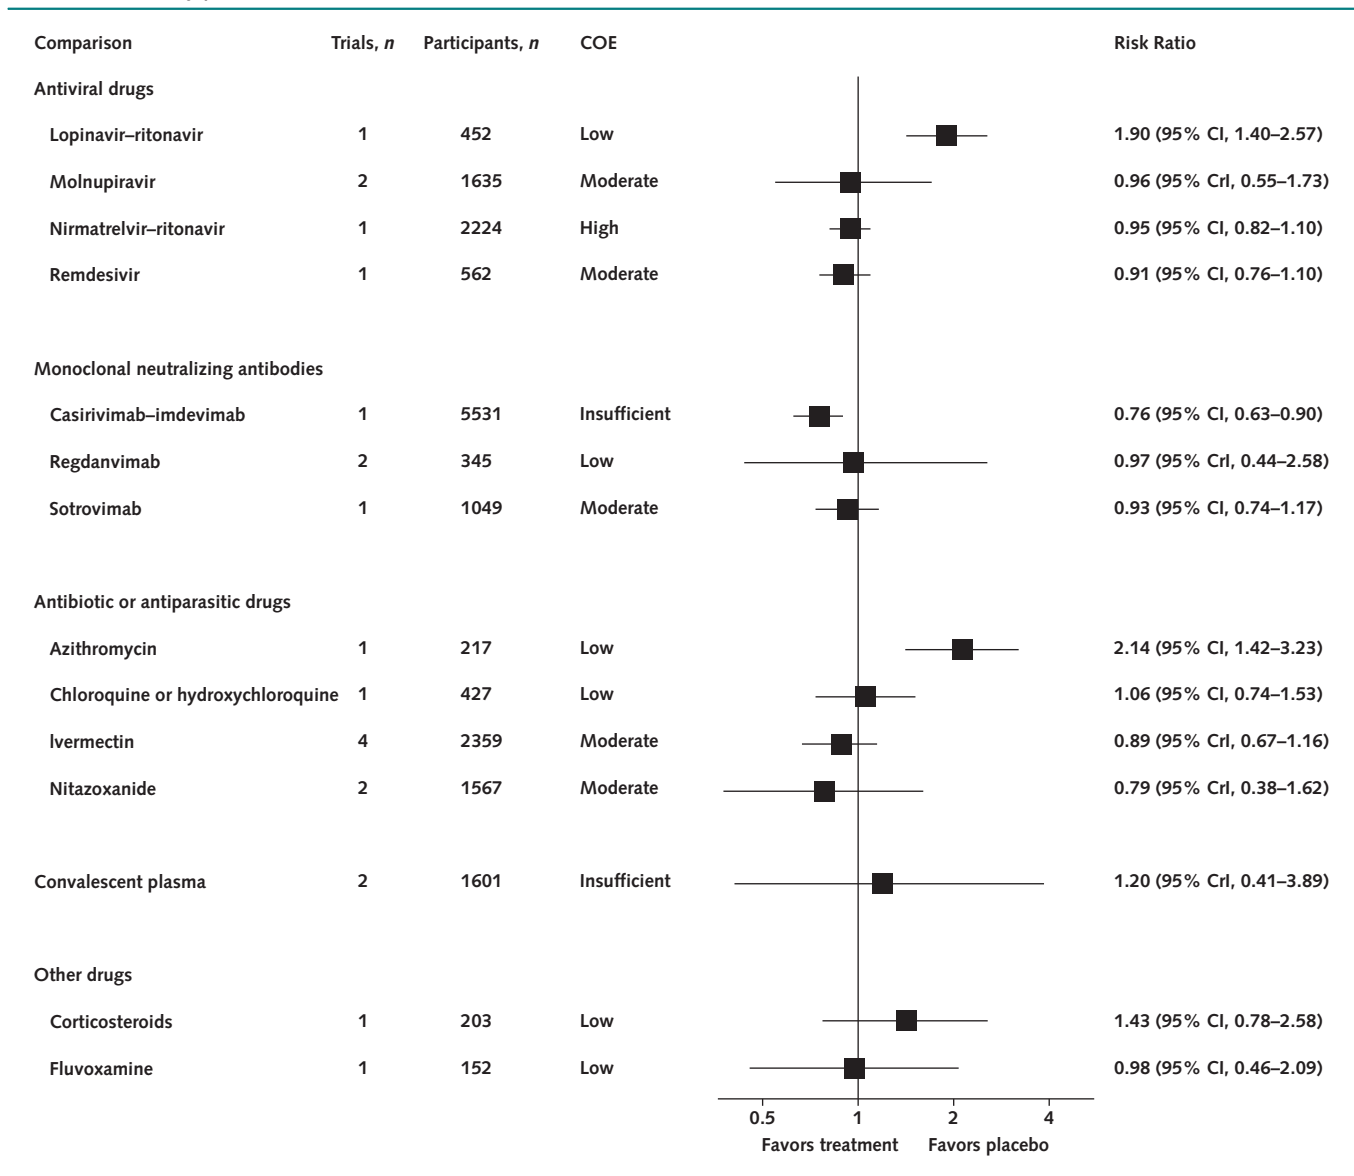

The risk ratios were self-calculated. CI = confidence interval; COE = certainty of evidence; CrI = credible interval.

Nirmatrelvir-ritonavir probably reduced all-cause mortality (0% vs. 1.1%; RR, 0.04 [CI, 0.002 to 0.68]; moderate COE) and hospitalization due to COVID-19 for patients with 5 or fewer days of symptoms (0.7% vs. 6.2%; RR, 0.12 [CI, 0.06 to 0.26]; moderate COE). The incidence of any adverse events did not statistically differ compared with placebo (22.6% vs. 23.9%; RR, 0.95 [CI, 0.82 to 1.10]; high COE).

**Remdesivir.** One RCT (*n* = 584; some risk of bias) assessed remdesivir, 200 mg on day 1 and 100 mg on days 2 and 3, compared with placebo (44).

Remdesivir may improve recovery between days 1 and 14 (36.1% vs. 20.0%; rate ratio, 1.92 [CI, 1.26 to 2.94]; low COE). There was no statistical difference in incidence of any adverse events (42.3% vs. 46.3%; RR, 0.91 [CI, 0.76 to 1.10]; moderate COE). Evidence

was insufficient to draw conclusions about other outcomes.

**Monoclonal Neutralizing Antibodies**

We identified studies for 3 out of 5 monoclonal neutralizing antibodies approved by the U.S. Food and Drug Administration or the European Medicines Agency at the date of our search (4 April 2022).

**Casirivimab-Imdevimab.** One RCT (*n* = 4057; some risk of bias) assessed casirivimab-imdevimab, 1200 to 8000 mg, compared with placebo (25). Casirivimab-imdevimab reduced time to recovery (10 vs. 14 median days; high COE) and probably decreased hospitalizations due to COVID-19 (1.3% vs. 4.4%; RR, 0.30 [CI, 0.20 to 0.45]; moderate COE). Evidence was insufficient to draw conclusions about other outcomes.

**Table.** Results and COE Ratings for Each Treatment Versus Placebo

| Treatment                                 | All-Cause Mortality                                                                                                                                                                   | COVID-19-Specific Mortality                                                                                                                                           | Recovery                                                                                                                                                                          | Time to Recovery                                                                                                                                                                    | Hospitalization Due to COVID-19                                                                                                                                                      | Serious Adverse Events                                                                                                                                                            | Adverse Events                                                                                                                                                                           |
|-------------------------------------------|---------------------------------------------------------------------------------------------------------------------------------------------------------------------------------------|-----------------------------------------------------------------------------------------------------------------------------------------------------------------------|-----------------------------------------------------------------------------------------------------------------------------------------------------------------------------------|-------------------------------------------------------------------------------------------------------------------------------------------------------------------------------------|--------------------------------------------------------------------------------------------------------------------------------------------------------------------------------------|-----------------------------------------------------------------------------------------------------------------------------------------------------------------------------------|------------------------------------------------------------------------------------------------------------------------------------------------------------------------------------------|
| <b>Antiviral drugs</b>                    |                                                                                                                                                                                       |                                                                                                                                                                       |                                                                                                                                                                                   |                                                                                                                                                                                     |                                                                                                                                                                                      |                                                                                                                                                                                   |                                                                                                                                                                                          |
| Lopinavir-ritonavir vs. placebo (30)      | Studies: 1<br>Participants: 471<br>Study duration: 90 d<br>Treatment effect: 1% vs. 0.4%; RR, 1.86 (95% CI, 0.17 to 20.38)*<br>Insufficient COE                                       | No evidence                                                                                                                                                           | No evidence                                                                                                                                                                       | No evidence                                                                                                                                                                         | Studies: 1<br>Participants: 471<br>Study duration: 90 d<br>Treatment effect: 6% vs. 5%; HR, 1.16 (95% CI, 0.53 to 2.56)<br>Low COE for non-statistically different effect            | Studies: 1<br>Participants: 452<br>Study duration: 90 d<br>Treatment effect: 9% vs. 6%; RR, 1.58 (95% CI, 0.79 to 3.16)*<br>Low COE for non-statistically different effect        | Studies: 1<br>Participants: 452<br>Study duration: 90 d<br>Treatment effect: 40% vs. 21%; RR, 1.90 (95% CI, 1.40 to 2.57)*<br>Low COE for higher risk with lopinavir-ritonavir           |
| Molnupiravir vs. placebo (31, 33)         | Studies: 1<br>Participants: 1433<br>Study duration: 29 d<br>Treatment effect: 0.1% vs. 1%; RR, 0.11 (95% CI, 0.01 to 0.86)*<br>Low COE for lower risk with molnupiravir               | Studies: 1<br>Participants: 1433<br>Study duration: 29 d<br>Treatment effect: 0% vs. 1%; RR, 0.11 (95% CI, 0.01 to 0.86)*<br>Low COE for lower risk with molnupiravir | Studies: 1<br>Participants: 1295<br>Study duration: 29 d<br>Treatment effect: 48% vs. 48%; OR, 1.04 (95% CI, 0.84 to 1.29)<br>Moderate COE for non-statistically different effect | Studies: 1<br>Participants: 202<br>Study duration: 28 d<br>Treatment effect: molnupiravir, 5.5 to 9 d; placebo, 8.5 d<br>Low COE for similar effect with molnupiravir               | Studies: 1<br>Participants: 1408<br>Study duration: 29 d<br>Treatment effect: 6% vs. 8%; RR, 0.79 (95% CI, 0.54 to 1.16)*<br>Low COE for non-statistically different effect          | Studies: 2<br>Participants: 1635<br>Study duration: 28 to 29 d<br>Treatment effect: 6% vs. 9%; RR, 0.77 (95% CI, 0.32 to 2.03)*<br>Low COE for non-statistically different effect | Studies: 2<br>Participants: 1635<br>Study duration: 28 to 29 d<br>Treatment effect: 30% vs. 32%; RR, 0.96 (95% CI, 0.55 to 1.73)*<br>Moderate COE for non-statistically different effect |
| Nirmatrelvir-ritonavir vs. placebo (35)   | Studies: 1<br>Participants: 2085<br>Study duration: 28 d<br>Treatment effect: 0% vs. 1%; RR, 0.04 (95% CI, 0.002 to 0.68)*<br>Moderate COE for lower risk with nirmatrelvir-ritonavir | No evidence                                                                                                                                                           | No evidence                                                                                                                                                                       | No evidence                                                                                                                                                                         | Studies: 1<br>Participants: 2085<br>Study duration: 28 d<br>Treatment effect: 1% vs. 6%; RR, 0.12 (95% CI, 0.06 to 0.26)*<br>Moderate COE for lower risk with nirmatrelvir-ritonavir | Studies: 1<br>Participants: 2224<br>Study duration: 34 d<br>Treatment effect: 2% vs. 7%; RR, 0.25 (95% CI, 0.16 to 0.38)*<br>Insufficient COE                                     | Studies: 1<br>Participants: 2224<br>Study duration: 34 d<br>Treatment effect: 23% vs. 24%; RR, 0.95 (95% CI, 0.82 to 1.10)*<br>High COE for non-statistically different effect           |
| Remdesivir vs. placebo (44)               | Studies: 1<br>Participants: 562<br>Study duration: 28 d<br>Treatment effect: 0% vs. 0%; RR not estimable<br>Insufficient COE                                                          | No evidence                                                                                                                                                           | Studies: 1<br>Participants: 334<br>Study duration: 14 d<br>Treatment effect: 36% vs. 20%; rate ratio, 1.92 (95% CI, 1.26 to 2.94)<br>Low COE for greater effect with remdesivir   | No evidence                                                                                                                                                                         | Studies: 1<br>Participants: 562<br>Study duration: 28 d<br>Treatment effect: 2% vs. 6%; HR, 0.28 (95% CI, 0.10 to 0.75)<br>Insufficient COE                                          | Studies: 1<br>Participants: 562<br>Study duration: 28 d<br>Treatment effect: 2% vs. 7%; RR, 0.27 (95% CI, 0.10 to 0.70)<br>Insufficient COE                                       | Studies: 1<br>Participants: 562<br>Study duration: 28 d<br>Treatment effect: 42% vs. 46%; RR, 0.91 (95% CI, 0.76 to 1.10)<br>Moderate COE for non-statistically different effect         |
| <b>Monoclonal neutralizing antibodies</b> |                                                                                                                                                                                       |                                                                                                                                                                       |                                                                                                                                                                                   |                                                                                                                                                                                     |                                                                                                                                                                                      |                                                                                                                                                                                   |                                                                                                                                                                                          |
| Casirivimab-imdevimab vs. placebo (25)    | Studies: 1<br>Participants: 4057<br>Study duration: 29 d<br>Treatment effect: 0.1% vs. 0.2%; RR, 0.33 (95% CI, 0.06 to 1.97)<br>Insufficient COE                                      | No evidence                                                                                                                                                           | No evidence                                                                                                                                                                       | Studies: 1<br>Participants: 3432<br>Study duration: 29 d<br>Treatment effect: 10 vs. 14 d; P = 0.0001<br>High COE for greater effect with casirivimab-imdevimab                     | Studies: 1<br>Participants: 4057<br>Study duration: 29 d<br>Treatment effect: 1% vs. 4%; RR, 0.30 (95% CI, 0.20 to 0.45)<br>Moderate COE for lower risk with casirivimab-imdevimab   | Studies: 1<br>Participants: 5531<br>Study duration: 45 d<br>Treatment effect: 1% vs. 4%; RR, 0.34 (95% CI, 0.24 to 0.48)<br>Insufficient COE                                      | Studies: 1<br>Participants: 5531<br>Study duration: 45 d<br>Treatment effect: 8% vs. 3%; RR, 0.76 (95% CI, 0.63 to 0.90)<br>Insufficient COE                                             |
| Regdanvimab vs. placebo (34, 42)          | Studies: 1<br>Participants: 325<br>Study duration: 28 d<br>Treatment effect: 0% vs. 0%; RR not estimable<br>Insufficient COE                                                          | No evidence                                                                                                                                                           | Studies: 1<br>Participants: 285<br>Study duration: 28 d<br>Treatment effect: 87% vs. 72%; RR, 1.21 (95% CI, 1.05 to 1.38)<br>Moderate COE for greater effect with regdanvimab     | Studies: 2<br>Participants: 303<br>Study duration: 14 to 28 d<br>Treatment effect: regdanvimab, 5.5 to 9 d; placebo, 8.0 to 8.5 d<br>Low COE for non-statistically different effect | Studies: 1<br>Participants: 307<br>Study duration: 28 d<br>Treatment effect: 4% vs. 9%; RR, 0.51 (95% CI, 0.21 to 1.26)<br>Low COE for non-statistically different effect            | Studies: 2<br>Participants: 345<br>Study duration: 14 to 28 d<br>Treatment effect: 0% vs. 0%; RR not estimable<br>Insufficient COE                                                | Studies: 2<br>Participants: 345<br>Study duration: 14 to 28 d<br>Treatment effect: 29% vs. 31%; RR, 0.97 (95% CI, 0.44 to 2.58)<br>Low COE for non-statistically different effect        |

Continued on following page

Table—Continued

| Treatment                                                  | All-Cause Mortality                                                                                                                                                               | COVID-19-Specific Mortality                                                                                                                         | Recovery                                                                                                                                                                                   | Time to Recovery                                                                                                                                                         | Hospitalization Due to COVID-19                                                                                                                                                    | Serious Adverse Events                                                                                                                                                             | Adverse Events                                                                                                                                                                           |
|------------------------------------------------------------|-----------------------------------------------------------------------------------------------------------------------------------------------------------------------------------|-----------------------------------------------------------------------------------------------------------------------------------------------------|--------------------------------------------------------------------------------------------------------------------------------------------------------------------------------------------|--------------------------------------------------------------------------------------------------------------------------------------------------------------------------|------------------------------------------------------------------------------------------------------------------------------------------------------------------------------------|------------------------------------------------------------------------------------------------------------------------------------------------------------------------------------|------------------------------------------------------------------------------------------------------------------------------------------------------------------------------------------|
| Sotrovimab vs. placebo (38)                                | Studies: 1<br>Participants: 1057<br>Study duration: 29 d<br>Treatment effect: 0% vs. 0.4%; RR, 0.20 (95% CI, 0.01 to 4.12)<br>Insufficient COE                                    | No evidence                                                                                                                                         | No evidence                                                                                                                                                                                | No evidence                                                                                                                                                              | Studies: 1<br>Participants: 1057<br>Study duration: 29 d<br>Treatment effect: 1% vs. 6%; RR, 0.20 (95% CI, 0.08 to 0.48)<br>Low COE for lower risk with sotrovimab                 | Studies: 1<br>Participants: 1049<br>Study duration: 29 d<br>Treatment effect: 2% vs. 6%; RR, 0.3 (95% CI, 0.18 to 0.68)<br>Insufficient COE                                        | Studies: 1<br>Participants: 1049<br>Study duration: 29 d<br>Treatment effect: 22% vs. 23%; RR, 0.93 (95% CI, 0.74 to 1.17)<br>Moderate COE for non-statistically different effect        |
| <b>Antibiotic or antiparasitic drugs</b>                   |                                                                                                                                                                                   |                                                                                                                                                     |                                                                                                                                                                                            |                                                                                                                                                                          |                                                                                                                                                                                    |                                                                                                                                                                                    |                                                                                                                                                                                          |
| Azithromycin vs. placebo (41)                              | Studies: 1<br>Participants: 197<br>Study duration: 21 d<br>Treatment effect: 0% vs. 0%; RR not estimable<br>Insufficient COE                                                      | No evidence                                                                                                                                         | Studies: 1<br>Participants: 201<br>Study duration: 14 d<br>Treatment effect: 50% vs. 50%; RR, 1.02 (95% CI, 0.91 to 1.13)<br>Low COE for non-statistically different effect                | No evidence                                                                                                                                                              | Studies: 1<br>Participants: 197<br>Study duration: 21 d<br>Treatment effect: 4% vs. 0%; RR, 6.37 (95% CI, 0.36 to 113.59)<br>Insufficient COE                                      | Studies: 1<br>Participants: 217<br>Study duration: 21 d<br>Treatment effect: 0% vs. 0%; RR not estimable<br>Insufficient COE                                                       | Studies: 1<br>Participants: 217<br>Study duration: 3 d<br>Treatment effect: 57% vs. 26%; RR, 2.14 (95% CI, 1.42 to 3.23)<br>Low COE for higher risk with azithromycin                    |
| Chloroquine or hydroxychloroquine vs. placebo (27, 28, 30) | Studies: 3<br>Participants: 1045<br>Study duration: 21 to 90 d<br>Treatment effect: 0% vs. 0.2%; RR, 0.41 (95% CI, 0.05 to 3.31)*<br>Insufficient COE                             | Studies: 2<br>Participants: 604<br>Study duration: 21 to 30 d<br>Treatment effect: 0% vs. 0%; RR not estimable<br>Insufficient COE                  | Studies: 1<br>Participants: 147<br>Study duration: 30 d<br>Treatment effect: 61% vs. 78%; RR, 0.78 (95% CI, 0.62 to 0.97)*<br>Low COE for lower effect with chloroquine/hydroxychloroquine | Studies: 1<br>Participants: 148<br>Study duration: 30 d<br>Treatment effect: 14% vs. 12 d<br>Low COE for non-statistically different effect                              | Studies: 3<br>Participants: 1045<br>Study duration: 21 to 90 d<br>Treatment effect: 3% vs. 4%; RR, 0.90 (95% CrI, 0.37 to 2.21)*<br>Low COE for non-statistically different effect | Studies: 3<br>Participants: 1045<br>Study duration: 21 to 90 d<br>Treatment effect: 2% vs. 3%; RR, 1.02 (95% CrI, 0.36 to 2.96)*<br>Low COE for non-statistically different effect | Studies: 1<br>Participants: 427<br>Study duration: 90 d<br>Treatment effect: 22% vs. 21%; RR, 1.06 (95% CI, 0.74 to 1.53)<br>Low COE for non-statistically different effect              |
| Ivermectin vs. placebo (26, 29, 47-49)                     | Studies: 5<br>Participants: 2452<br>Study duration: 21 to 30 d<br>Treatment effect: 2% vs. 2%; RR, 0.89 (95% CrI, 0.42 to 1.91)<br>Low COE for non-statistically different effect | Studies: 3<br>Participants: 593<br>Study duration: 21 to 30 d<br>Treatment effect: 0% vs. 0.4%; RR, 0.55 (95% CI, 0.07 to 4.37)<br>Insufficient COE | Studies: 2<br>Participants: 569<br>Study duration: 21 to 30 d<br>Treatment effect: 68% vs. 66%; RR, 1.04 (95% CrI, 0.61 to 1.72)*<br>Moderate COE for non-statistically different effect   | Studies: 3<br>Participants: 1836<br>Study duration: 21 to 30 d<br>Treatment effect: ivermectin, 10 to 29 d; placebo, 12 to 14 d<br>Insufficient COE                      | Studies: 5<br>Participants: 2452<br>Study duration: 21 to 30 d<br>Treatment effect: 8% vs. 10%; RR, 0.81 (95% CrI, 0.49 to 1.34)<br>Low COE for non-statistically different effect | Studies: 5<br>Participants: 2452<br>Study duration: 21 to 30 d<br>Treatment effect: 2% vs. 2%; RR, 1.06 (95% CrI, 0.47 to 2.5)<br>Insufficient COE                                 | Studies: 4<br>Participants: 2359<br>Study duration: 21 to 30 d<br>Treatment effect: 28% vs. 32%; RR, 0.89 (95% CrI, 0.67 to 1.16)<br>Moderate COE for non-statistically different effect |
| Nitazoxanide vs. placebo (32, 43)                          | Studies: 2<br>Participants: 1567<br>Study duration: 14 to 28 d<br>Treatment effect: 0.2% vs. 0%; RR, 2.08 (95% CI, 0.19 to 22.35)<br>Insufficient COE                             | Studies: 1<br>Participants: 1092<br>Study duration: 28 d<br>Treatment effect: 0.2% vs. 0%; RR, 2.68 (95% CI, 0.13 to 55.74)<br>Insufficient COE     | Studies: 1<br>Participants: 392<br>Study duration: mean, 5 d<br>Treatment effect: 70% vs. 74%; RR, 0.94 (95% CI, 0.83 to 1.07)<br>Moderate COE for non-statistically different effect      | Studies: 1<br>Participants: 379<br>Treatment effect: median days, 13.3 (IQR, 6.3 to 21) vs. 12.4 (IQR, 7.2 to 21)<br>Moderate COE for non-statistically different effect | Studies: 2<br>Participants: 1567<br>Study duration: 5 to 28 d<br>Treatment effect: 1% vs. 1%; RR, 0.69 (95% CrI, 0.19 to 2.5)<br>Low COE for non-statistically different effect    | Studies: 2<br>Participants: 1567<br>Study duration: 5 to 28 d<br>Treatment effect: 0.3% vs. 1%; RR, 0.33 (95% CrI, 0.07 to 1.56)<br>Low COE for non-statistically different effect | Studies: 2<br>Participants: 1567<br>Study duration: 5 to 28 d<br>Treatment effect: 14% vs. 19%; RR, 0.79 (95% CrI, 0.38 to 1.62)<br>Moderate COE for non-statistically different effect  |
| <b>Convalescent plasma</b>                                 |                                                                                                                                                                                   |                                                                                                                                                     |                                                                                                                                                                                            |                                                                                                                                                                          |                                                                                                                                                                                    |                                                                                                                                                                                    |                                                                                                                                                                                          |
| Convalescent plasma vs. placebo (24, 36, 37, 46)           | Studies: 4<br>Participants: 2272<br>Study duration: 15 to 28 d                                                                                                                    | Studies: 2<br>Participants: 1385<br>Study duration: 15 to 28 d                                                                                      | No evidence                                                                                                                                                                                | Studies: 1<br>Participants: 376<br>Study duration: 30 d<br>Treatment effect: 12                                                                                          | Studies: 2<br>Participants: 1601<br>Study duration: 28 d                                                                                                                           | Studies: 4<br>Participants: 2272<br>Study duration: 15 to 28 d                                                                                                                     | Studies: 2<br>Participants: 1601<br>Study duration: 28 d                                                                                                                                 |

Continued on following page

Table-Continued

| Treatment                        | All-Cause Mortality                                                                                                                                                               | COVID-19-Specific Mortality                                                                                                  | Recovery                                                                                                                                                                    | Time to Recovery                                                                            | Hospitalization Due to COVID-19                                                                                                                                                    | Serious Adverse Events                                                                                                                                                    | Adverse Events                                                                                                                                                              |
|----------------------------------|-----------------------------------------------------------------------------------------------------------------------------------------------------------------------------------|------------------------------------------------------------------------------------------------------------------------------|-----------------------------------------------------------------------------------------------------------------------------------------------------------------------------|---------------------------------------------------------------------------------------------|------------------------------------------------------------------------------------------------------------------------------------------------------------------------------------|---------------------------------------------------------------------------------------------------------------------------------------------------------------------------|-----------------------------------------------------------------------------------------------------------------------------------------------------------------------------|
|                                  | Treatment effect: 1% vs. 1%; RR, 0.68 (95% CrI, 0.20 to 2.34)<br>Low COE for non-statistically different effect                                                                   | Treatment effect: 0.3% vs. 1%; RR, 0.37 (95% CI, 0.08 to 1.84)<br>Insufficient COE                                           |                                                                                                                                                                             | vs. 12 d; HR, 1.05 (95% CI, 0.85 to 1.30)<br>Low COE for non-statistically different effect | Treatment effect: 5% vs. 7%; RR, 0.70 (95% CI, 0.30 to 1.65)<br>Insufficient COE                                                                                                   | Treatment effect: 1% vs. 1%; RR, 1.09 (95% CrI, 0.38 to 3.78)<br>Low COE for non-statistically different effect                                                           | Treatment effect: 7% vs. 8%; RR, 1.2 (95% CI, 0.41 to 3.89)<br>Insufficient COE                                                                                             |
| <b>Other drugs</b>               |                                                                                                                                                                                   |                                                                                                                              |                                                                                                                                                                             |                                                                                             |                                                                                                                                                                                    |                                                                                                                                                                           |                                                                                                                                                                             |
| Ciclesonide vs. placebo (45)     | Studies: 1<br>Participants: 203<br>Study duration: 14 d<br>Treatment effect: 0% vs. 0%; RR not estimable<br>Insufficient COE                                                      | Studies: 1<br>Participants: 215<br>Study duration: 14 d<br>Treatment effect: 0% vs. 0%; RR not estimable<br>Insufficient COE | Studies: 1<br>Participants: 203<br>Study duration: 14 d<br>Treatment effect: 66% vs. 58%; RR, 1.13 (95% CI, 0.91 to 1.40)<br>Low COE for non-statistically different effect | No evidence                                                                                 | Studies: 1<br>Participants: 203<br>Study duration: 14 d<br>Treatment effect: 3% vs. 6%; RR, 0.47 (95% CI, 0.12 to 1.82)<br>Insufficient COE                                        | Studies: 1<br>Participants: 209<br>Study duration: 14 d<br>Treatment effect: 6% vs. 7%; RR, 1.36 (95% CI, 0.45 to 4.15)<br>Low COE for non-statistically different effect | Studies: 1<br>Participants: 203<br>Study duration: 14 d<br>Treatment effect: 22% vs. 15%; RR, 1.43 (95% CI, 0.79 to 2.58)<br>Low COE for non-statistically different effect |
| Fluvoxamine vs. placebo (39, 40) | Studies: 2<br>Participants: 1649<br>Study duration: 15 to 28 d<br>Treatment effect: 2% vs. 3%; RR, 0.71 (95% CrI, 0.24 to 2.10)<br>Low COE for non-statistically different effect | Studies: 1<br>Participants: 152<br>Study duration: 15 d<br>Treatment effect: 0% vs. 0%; RR not estimable<br>Insufficient COE | No evidence                                                                                                                                                                 | No evidence                                                                                 | Studies: 2<br>Participants: 1649<br>Study duration: 15 to 28 d<br>Treatment effect: 9% vs. 12%; RR, 0.71 (95% CrI, 0.22 to 1.70)<br>Low COE for non-statistically different effect | Studies: 1<br>Participants: 152<br>Study duration: 15 d<br>Treatment effect: 1% vs. 7%; RR, 0.18 (95% CI, 0.02 to 1.50)<br>Insufficient COE                               | Studies: 1<br>Participants: 152<br>Study duration: 15 d<br>Treatment effect: 15% vs. 15%; RR, 0.98 (95% CI, 0.46 to 2.09)<br>Low COE for non-statistically different effect |

CI = confidence interval; COE = certainty of evidence; CrI = credible interval; HR = hazard ratio; OR = odds ratio; RR = risk ratio.  
\* The RR was self-calculated.

**Regdanvimab.** Two RCTs ( $n = 345$ ; 1 with low risk of bias and 1 with some risk of bias) assessed regdanvimab, 20 to 80 mg/kg of body weight, compared with placebo (34, 42).

Although 1 study ( $n = 250$ ) found that regdanvimab probably improved recovery (86.6% vs. 71.7%; RR, 1.21 [CI, 1.05 to 1.38]; moderate COE) (34), together the studies did not find a statistically significant effect on time to recovery (5.5 to 9.0 vs. 8.0 to 8.5 median days; low COE). The results for hospitalization due to COVID-19 (4.4% vs. 8.7%; RR, 0.51 [CI, 0.21 to 1.26]; 1 RCT; low COE) (34) and incidence of adverse events (29.4% vs. 30.7%; RR, 0.97 [CrI, 0.44 to 2.58]; 2 RCTs; low COE) (Supplement Figure 6) also did not differ statistically between groups. Evidence was insufficient to draw conclusions about any of the other outcomes.

**Sotrovimab.** One RCT ( $n = 1057$ ; low risk of bias) assessed sotrovimab, 500 mg, compared with placebo (38).

Sotrovimab may reduce hospitalization due to COVID-19 (1.1% vs. 5.7%; RR, 0.20 [CI, 0.08 to 0.48]; low COE) and resulted in no statistical difference in incidence of adverse events (21.8% vs. 23.4%; RR, 0.93 [CI, 0.74 to 1.17]; moderate COE). Evidence was insufficient to draw conclusions about other outcomes.

**Antibiotic or Antiparasitic Drugs**

**Azithromycin.** One RCT ( $n = 263$ ; some risk of bias) assessed azithromycin in a single 1.2-g dose compared with placebo (41).

Azithromycin may have no effect on recovery at day 14 (50.4% vs. 50.0%; RR, 1.02 [CI, 0.91 to 1.13]; low COE) and may increase the incidence of adverse events (56.6% vs. 26.4%; RR, 2.14 [CI, 1.42 to 3.23]; low COE). Evidence was insufficient to draw conclusions about other outcomes.

**Chloroquine or Hydroxychloroquine.** Three RCTs ( $n = 893$ ; some risk of bias) assessed hydroxychloroquine, 800 mg on day 1 followed by 400 mg/d for 5 days then 600 mg/d for 9 days, compared with placebo (27, 28, 30).

Hydroxychloroquine may reduce the likelihood of recovery (60.9% vs. 78.4%; RR, 0.78 [CI, 0.62 to 0.97]; 1 RCT; low COE), but the median time to recovery (14 vs. 12 days; low COE) did not differ statistically between the treatment groups after 30 days (27). Hydroxychloroquine may not reduce risk for hospitalization due to COVID-19 (3.0% vs. 3.6%; RR, 0.90 [CrI, 0.37 to 2.21]; 3 RCTs; low COE) (Supplement Figure 7). Hydroxychloroquine may not result in any statistical difference in serious adverse events (2.2% vs. 2.9%; RR, 1.02 [CrI, 0.36 to 2.96]; 3 RCTs; low COE) (Supplement Figure 8) or any adverse events (22.2% vs. 20.9%; RR, 1.06 [CI, 0.74 to 1.53]; 1 RCT; low COE) (30). Evidence was insufficient to draw conclusions about other outcomes.

**Ivermectin.** Five RCTs ( $n = 2452$ ; 4 with some risk of bias and 1 with high risk of bias) compared ivermectin,



200 to 1200 mcg/kg in a single dose or for 2 to 5 days, with placebo (26, 29, 47–49).

Ivermectin may not have any statistically significant benefit on all-cause mortality (2.0% vs. 2.3%; RR, 0.89 [CrI, 0.42 to 1.91]; low COE) (Supplement Figure 9), recovery (68.2% vs. 65.6%; RR, 1.04 [CrI, 0.61 to 1.72]; moderate COE) (Supplement Figure 10), or hospitalization due to COVID-19 (8.1% vs. 9.9%; RR, 0.81 [CrI, 0.49 to 1.34]; low COE) (Supplement Figure 11). A sensitivity analysis without the study that had high risk of bias found similar results for reduced hospitalization (8.1% vs. 10.2%; RR, 0.78 [CrI, 0.46 to 1.28]). There was no statistical difference in incidence of adverse events (27.7% vs. 31.8%; RR, 0.89 [CrI, 0.67 to 1.16]; moderate COE) (Supplement Figure 12). Evidence was insufficient to draw conclusions about other outcomes.

*Nitazoxanide.* Two RCTs ( $n = 1567$ ; some risk of bias) assessed nitazoxanide, 1200 or 500 mg/d, compared with placebo (32, 43).

Nitazoxanide resulted in no statistical difference in recovery (69.3% vs. 73.7%; RR, 0.94 [CrI, 0.83 to 1.07]; moderate COE) (32), median number of days to sustained clinical recovery (13.3 [IQR, 6.3 to 21] vs. 12.4 [IQR, 7.2 to 21];  $P = 0.88$ ; moderate COE) (43), or hospitalization due to COVID-19 (0.7% vs. 1.1%; RR, 0.69 [CrI, 0.19 to 2.5]; low COE) (Supplement Figure 13). There were also no statistical differences in the incidence of serious adverse events (0.3% vs. 1.1%; RR, 0.33 [CrI, 0.07 to 1.56]; low COE) (Supplement Figure 14) or any adverse events (14.2% vs. 19.3%; RR, 0.79 [CrI, 0.38 to 1.62]; moderate COE) (Supplement Figure 15). Evidence was insufficient to draw conclusions about other outcomes.

### Convalescent Plasma

Four RCTs ( $n = 2272$ ; 2 with low risk of bias and 2 with some risk of bias) assessed convalescent plasma, 250 to 300 mL in a single dose, compared with placebo (24, 36, 37, 46).

Convalescent plasma may have no statistical effect on all-cause mortality (0.6% vs. 0.9%; RR, 0.68 [CrI, 0.20 to 2.34]; 4 RCTs; low COE) (Supplement Figure 16), incidence of serious adverse events (1.1% vs. 1.1%; RR, 1.09 [CrI, 0.38 to 3.78]; 4 RCTs; low COE) (Supplement Figure 17), or time to symptom resolution (12 vs. 12 median days; hazard ratio, 1.05 [CrI, 0.85 to 1.30]; 1 RCT; low COE) (46). Evidence was insufficient to draw conclusions about other outcomes.

### Other Drugs

*Corticosteroids.* One RCT ( $n = 215$ ; low risk of bias) assessed ciclesonide, 1200 mcg inhaled twice daily or 200 mcg intranasally per day, compared with placebo (45).

Ciclesonide may result in no statistically significant difference for recovery (65.7% vs. 58.2%; RR, 1.13 [CrI, 0.91 to 1.40]; low COE), incidence of serious adverse events (6.6% vs. 4.9%; RR, 1.36 [CrI, 0.45 to 4.15]; low COE), or incidence of any adverse events (21.9% vs. 15.3%; RR, 1.43 [CrI, 0.79 to 2.58]; low COE). Evidence was insufficient to draw conclusions about other outcomes.

*Fluvoxamine.* Two trials ( $n = 1649$ ; 1 with low risk of bias and 1 with some risk of bias) assessed fluvoxamine, 100 mg/d, compared with placebo (39, 40).

Fluvoxamine may have no statistically significant effect on all-cause mortality (2.1% vs. 3.0%; RR, 0.71 [CrI, 0.24 to 2.10]; 2 RCTs; low COE) (Supplement Figure 18), hospitalization due to COVID-19 (9.1% vs. 12.2%; RR, 0.71 [CrI, 0.22 to 1.70]; 2 RCTs; low COE) (Supplement Figure 19), or any adverse events (15.0% vs. 15.3%; RR, 0.98 [CrI, 0.46 to 2.09]; 1 RCT; low COE). Evidence was insufficient to draw conclusions about other outcomes.

### Subgroup Analysis

One fluvoxamine trial (39) found no statistically significant interaction for the effect of age, sex, time from symptom onset, and comorbidities for hospitalization or extended emergency department visit due to COVID-19.

Several other trials reported comparisons of the study groups in population subsets but without testing for interaction. Most confirmed the overall result (30, 32, 35, 41, 43, 44, 46). Two studies reported an increased or decreased risk for hospitalization due to COVID-19 or recovery for certain subgroups despite the overall effect showing no difference between the groups (33, 34) (Supplement Table 9, available at [Annals.org](https://www.annals.org)).

### Surveillance

The first surveillance search yielded 6 eligible RCTs (50–55). The studies compared molnupiravir (51), ivermectin (50–52, 54), fluvoxamine (55), and the monoclonal neutralizing antibodies tixagevimab–cilgavimab (53) with placebo (Supplement Table 10, available at [Annals.org](https://www.annals.org)). The study on tixagevimab–cilgavimab (53) reported a reduction in COVID-19–related deaths or progression to severe disease (4% vs. 10%; RR, 0.43 [CrI, 0.25 to 0.75]) and an increase in any adverse events (29% vs. 36%; RR, 0.81 [CrI, 0.67 to 0.98]). It was conducted before the emergence of the Omicron variant. The remaining 5 studies reported no beneficial or harmful effects for outcomes of interest (50–52, 54, 55).

### DISCUSSION

This living, rapid review on 12 COVID-19 outpatient treatments, which included 26 RCTs conducted before dominance of the current Omicron variant, found that nirmatrelvir–ritonavir and the monoclonal antibodies casirivimab–imdevimab and regdanvimab had the strongest evidence for benefit in outpatients with COVID-19, with reduced hospitalizations, reduced all-cause mortality, or both. Molnupiravir may also reduce all-cause mortality and remdesivir may improve recovery, but evidence is less certain. However, these findings must be interpreted with caution because all studies were conducted before the dominance of the current Omicron variant. Specifically, a preprint article of the unblinded PANORAMIC (Platform Adaptive trial of NOvel antiVIRals for eArly treatMent of covid-19 In the Community) trial ( $n = 25\,783$ ), which was conducted in the United Kingdom during dominance of the Omicron variant, reports no difference for hospitalization, mortality, or serious adverse events but improved

early sustained recovery and time to first reported recovery between molnupiravir plus usual care and usual care (56). However, as a preprint article that has not yet been subject to peer review, this study did not meet the inclusion criteria for our surveillance.

Several *in vitro* studies have found that the monoclonal antibodies that were found to be effective in our review (casirivimab-imdevimab, regdanvimab, and sotrovimab) are ineffective against the Omicron subvariant BA.5 (57–59). Because Omicron and its subvariants have become the dominant strains in the United States during 2022 (60), the U.S. Food and Drug Administration has revoked authorization for casirivimab-imdevimab (in January 2022) and sotrovimab (in May 2022) (61, 62). Regdanvimab was never approved in the United States. The antivirals remdesivir, molnupiravir, and nirmatrelvir-ritonavir have been shown to retain susceptibility to Omicron subvariants, including BA.5, similar to that for the ancestral strain (63). Despite retaining neutralizing activities, the absolute effect of antivirals to prevent hospitalization and death might be lower due to the reduced overall severity of the Omicron variant compared with previous variants (64). Current evidence does not support the efficacy of convalescent plasma and several drugs that were repurposed for use in outpatients with COVID-19, such as ivermectin, lopinavir-ritonavir, azithromycin, chloroquine or hydroxychloroquine, nitazoxanide, inhaled or intranasal corticosteroids, and fluvoxamine. Lopinavir-ritonavir and azithromycin may even have harmful effects, and hydroxychloroquine may lead to lower recovery rates.

We did not identify any results related to COVID-19 rebound, a phenomenon in which patients develop symptoms of COVID-19 after taking the drug (65). However, because rebound has also been observed in untreated persons with COVID-19 (66), clinical trials are needed to understand the effects of antivirals on rebound.

Our results are largely consistent with findings from other reviews, which were conducted in mixed populations of inpatients and outpatients and used standard of care as a comparison in addition to placebo. In line with our review, Cochrane reviews found beneficial effects for monoclonal antibodies (3) and nirmatrelvir-ritonavir (10) and no beneficial effects for chloroquine or hydroxychloroquine (5), convalescent plasma (9), ivermectin (6), or azithromycin (4). Other reviews showed that remdesivir increased recovery and reduced time to recovery and serious adverse events but also increased adverse events in hospitalized patients (67), and that fluvoxamine led to fewer hospitalizations in outpatients (68) when, unlike in this review, unpublished data were included.

This living, rapid review considered many aspects not evaluated in previous reviews. One of its strengths is its comprehensive assessment of the benefits and harms of 12 COVID-19 treatments of interest. Another strength of this study is its focus on placebo-controlled trials, which is the most rigorous study design for evaluating treatment efficacy because it ensures assay sensitivity (the ability to distinguish between effective and ineffective treatments) (69).

This review also has limitations. Although we restricted the literature search to only 1 database, evaluations of the Epistemonikos COVID-19 L-OVE Platform database have shown that it provides a comprehensive compilation of

COVID-19 treatments, containing nearly all cited studies (70). To prevent missing relevant studies, we double-checked our list of included studies with that of the COVID-NMA database (15).

Another limitation of our review is the lack of sufficient data for some outcomes. Included studies provided very low rates of hospitalization and mortality and low power in a population with mild to moderate disease severity. Insufficient data also precluded the exploration of heterogeneity across studies (71). The reported subgroup analyses were predominantly limited to exploratory or post hoc analyses and relied on small sample sizes. Although these analyses are useful for generating new hypotheses, recommendations for clinical practice should rely on prespecified subgroup analyses (72).

Finally, the greatest limitation is that included studies were conducted before the Omicron variant became dominant and lacked information on vaccination or prior infection status, which reduces the generalizability of the findings.

In conclusion, some antivirals and some monoclonal antibodies may improve recovery and reduce the risk for hospitalization in outpatients with mild to moderate COVID-19 from previous variants of SARS-CoV-2. However, the benefits of these therapies, particularly monoclonal antibodies, may be limited against the currently dominant Omicron variants.

From Cochrane Austria, Department for Evidence-based Medicine and Evaluation, University for Continuing Education Krems (Danube University Krems), Krems, Austria (I.S., A.D., D.L., I.M., K.T., E.P., M.F., I.K.); Faculty of Health and Medicine, University for Continuing Education Krems (Danube University Krems), Krems, Austria (R.E.); and Cochrane Austria, Department for Evidence-based Medicine and Evaluation, University for Continuing Education Krems (Danube University Krems), Krems, Austria, and RTI International, Research Triangle Park, North Carolina (G.G.).

**Acknowledgment:** The authors thank the COVID-NMA initiative for providing access to its data and allowing use of them. The authors also thank Manuela Müllner and Petra Wellemsen for project administration and Jennifer Yost from the ACP team for her support.

**Financial Support:** By the ACP.

**Disclosures:** Disclosures can be viewed at [www.acponline.org/authors/icmje/ConflictOfInterestForms.do?msNum=M22-2202](http://www.acponline.org/authors/icmje/ConflictOfInterestForms.do?msNum=M22-2202).

**Reproducible Research Statement:** *Study protocol:* Available from Dr. Sommer (e-mail, [isolde.sommer@donau-uni.ac.at](mailto:isolde.sommer@donau-uni.ac.at)). *Statistical code and data set:* Available from Mr. Emprechtinger (e-mail, [robert.emprechtinger@donau-uni.ac.at](mailto:robert.emprechtinger@donau-uni.ac.at)).

**Corresponding Author:** Isolde Sommer, MSc, MPH, PhD, Cochrane Austria, Department for Evidence-based Medicine and Evaluation, University for Continuing Education Krems, Dr. Karl Dorrek Straße 30, 3500 Krems, Austria; e-mail, [isolde.sommer@donau-uni.ac.at](mailto:isolde.sommer@donau-uni.ac.at).

Author contributions are available at [Annals.org](https://annals.org).

## References

- Mathieu E, Ritchie H, Rodés-Guirao L, et al. Coronavirus (COVID-19) Deaths. Our World In Data. Accessed at [https://ourworldindata.org/covid-deaths?country=\[APPROX\]USA](https://ourworldindata.org/covid-deaths?country=[APPROX]USA) on 18 May 2022.
- Woolf SH, Masters RK, Aron LY. Changes in life expectancy between 2019 and 2020 in the US and 21 peer countries. *JAMA Netw Open*. 2022;5:e227067. [PMID: 35416991] doi:10.1001/jamanetworkopen.2022.7067
- Kreuzberger N, Hirsch C, Chai KL, et al. SARS-CoV-2-neutralising monoclonal antibodies for treatment of COVID-19. *Cochrane Database Syst Rev*. 2021;9:CD013825. [PMID: 34473343] doi:10.1002/14651858.CD013825.pub2
- Popp M, Stegemann M, Riemer M, et al. Antibiotics for the treatment of COVID-19. *Cochrane Database Syst Rev*. 2021;10:CD015025. [PMID: 34679203] doi:10.1002/14651858.CD015025
- Singh B, Ryan H, Kredt T, et al. Chloroquine or hydroxychloroquine for prevention and treatment of COVID-19. *Cochrane Database Syst Rev*. 2021;2:CD013587. [PMID: 33624299] doi:10.1002/14651858.CD013587.pub2
- Popp M, Reis S, Schießer S, et al. Ivermectin for preventing and treating COVID-19. *Cochrane Database Syst Rev*. 2022;6:CD015017. [PMID: 35726131] doi:10.1002/14651858.CD015017.pub3
- Griesel M, Wagner C, Mikolajewska A, et al. Inhaled corticosteroids for the treatment of COVID-19. *Cochrane Database Syst Rev*. 2022;3:CD015125. [PMID: 35262185] doi:10.1002/14651858.CD015125
- Wagner C, Griesel M, Mikolajewska A, et al. Systemic corticosteroids for the treatment of COVID-19. *Cochrane Database Syst Rev*. 2021;8:CD014963. [PMID: 34396514] doi:10.1002/14651858.CD014963
- Piechotta V, Iannizzi C, Chai KL, et al. Convalescent plasma or hyperimmune immunoglobulin for people with COVID-19: a living systematic review. *Cochrane Database Syst Rev*. 2021;5:CD013600. [PMID: 34013969] doi:10.1002/14651858.CD013600.pub4
- Reis S, Metzendorf MI, Kuehn R, et al. Nirmatrelvir combined with ritonavir for preventing and treating COVID-19. *Cochrane Database Syst Rev*. 2022;9:CD015395. [PMID: 36126225] doi:10.1002/14651858.CD015395.pub2
- Garrity C, Gartlehner G, Nussbaumer-Streit B, et al. *Cochrane Rapid Reviews Methods Group* offers evidence-informed guidance to conduct rapid reviews. *J Clin Epidemiol*. 2021;130:13-22. [PMID: 33068715] doi:10.1016/j.jclinepi.2020.10.007
- Page MJ, Moher D, Bossuyt PM, et al. PRISMA 2020 explanation and elaboration: updated guidance and exemplars for reporting systematic reviews. *BMJ*. 2021;372:n160. [PMID: 33781993] doi:10.1136/bmj.n160
- Epistemonikos. L-OVE Platform. Accessed at <https://app.loveevidence.com/topics> on 21 September 2022.
- Qaseem A, Yost J, Forciea MA, et al; Scientific Medical Policy Committee of the American College of Physicians. The development of living, rapid practice points: summary of methods from the Scientific Medical Policy Committee of the American College of Physicians. *Ann Intern Med*. 2021;174:1126-32. [PMID: 34029483] doi:10.7326/M20-7641
- Boutron I, Chaimani A, Meerpohl JJ, et al; COVID-NMA Consortium. The COVID-NMA project: building an evidence ecosystem for the COVID-19 pandemic [Editorial]. *Ann Intern Med*. 2020;173:1015-7. [PMID: 32931326] doi:10.7326/M20-5261
- Sterne JAC, Savovic J, Page MJ, et al. RoB 2: a revised tool for assessing risk of bias in randomised trials. *BMJ*. 2019;366:l4898. [PMID: 31462531] doi:10.1136/bmj.l4898
- Kruschke JK, Liddell TM. The Bayesian New Statistics: Hypothesis testing, estimation, meta-analysis, and power analysis from a Bayesian perspective. *Psychon Bull Rev*. 2018;25:178-206. [PMID: 28176294] doi:10.3758/s13423-016-1221-4
- Gronau QF, Heck DW, Berkhout SW, et al. A primer on Bayesian model-averaged meta-analysis. *Adv Methods Pract Psychol Sci*. 2021;4:1-19. doi:10.1177/25152459211031256
- R Core Team. R: A Language and Environment for Statistical Computing. R Foundation for Statistical Computing; 2022.
- Röver C. Bayesian random-effects meta-analysis using the bayesmeta R package. *J Stat Softw*. 2020;93:1-51. doi:10.18637/jss.v093.i06
- Viechtbauer W. Conducting meta-analyses in R with the metafor package. *J Stat Softw*. 2010;36:1-48. doi:10.18637/jss.v036.i03
- West SL, Gartlehner G, Mansfield AJ, et al. Comparative Effectiveness Review Methods: Clinical Heterogeneity. Report no. 10-EHC070-EF. Agency for Healthcare Research and Quality. 2010. [PMID: 21433337]
- Balshem H, Helfand M, Schünemann HJ, et al. GRADE guidelines: 3. Rating the quality of evidence. *J Clin Epidemiol*. 2011;64:401-6. [PMID: 21208779] doi:10.1016/j.jclinepi.2010.07.015
- Libster R, Pérez Marc G, Wappner D, et al; Fundación INFANT-COVID-19 Group. Early high-titer plasma therapy to prevent severe Covid-19 in older adults. *N Engl J Med*. 2021;384:610-8. [PMID: 33406353] doi:10.1056/NEJMoa2033700
- Weinreich DM, Sivapalasingam S, Norton T, et al; Trial Investigators. REGEN-COV antibody combination and outcomes in outpatients with Covid-19. *N Engl J Med*. 2021;385:e81. [PMID: 34587383] doi:10.1056/NEJMoa2108163
- López-Medina E, López P, Hurtado IC, et al. Effect of ivermectin on time to resolution of symptoms among adults with mild COVID-19: a randomized clinical trial. *JAMA*. 2021;325:1426-35. [PMID: 33662102] doi:10.1001/jama.2021.3071
- Schwartz I, Boesen ME, Cerchiaro G, et al; ALBERTA HOPE COVID-19 Collaborators. Assessing the efficacy and safety of hydroxychloroquine as outpatient treatment of COVID-19: a randomized controlled trial. *CMAJ Open*. 2021;9:E693-E702. [PMID: 34145052] doi:10.9778/cmajo.20210069
- Omrani AS, Pathan SA, Thomas SA, et al. Randomized double-blinded placebo-controlled trial of hydroxychloroquine with or without azithromycin for virologic cure of non-severe Covid-19. *EClinicalMedicine*. 2020;29:100645. [PMID: 33251500] doi:10.1016/j.eclinm.2020.100645
- Chaccour C, Casellas A, Blanco-Di Matteo A, et al. The effect of early treatment with ivermectin on viral load, symptoms and humoral response in patients with non-severe COVID-19: a pilot, double-blind, placebo-controlled, randomized clinical trial. *EClinicalMedicine*. 2021;32:100720. [PMID: 33495752] doi:10.1016/j.eclinm.2020.100720
- Reis G, Moreira Silva EADS, Medeiros Silva DC, et al; TOGETHER Investigators. Effect of early treatment with hydroxychloroquine or lopinavir and ritonavir on risk of hospitalization among patients with COVID-19: the TOGETHER randomized clinical trial. *JAMA Netw Open*. 2021;4:e216468. [PMID: 33885775] doi:10.1001/jamanetworkopen.2021.6468
- Fischer WA 2nd, Eron JJ Jr, Holman W, et al. A phase 2a clinical trial of molnupiravir in patients with COVID-19 shows accelerated SARS-CoV-2 RNA clearance and elimination of infectious virus. *Sci Transl Med*. 2022;14:eabl7430. [PMID: 34941423] doi:10.1126/scitranslmed.abl7430
- Rocco PRM, Silva PL, Cruz FF, et al; SARITA-2 investigators. Early use of nitazoxanide in mild COVID-19 disease: randomised, placebo-controlled trial. *Eur Respir J*. 2021;58. [PMID: 33361100] doi:10.1183/13993003.03725-2020
- Jayk Bernal A, Gomes da Silva MM, Musungaie DB, et al; MOVE-OUT Study Group. Molnupiravir for oral treatment of Covid-19 in nonhospitalized patients. *N Engl J Med*. 2022;386:509-20. [PMID: 34914868] doi:10.1056/NEJMoa2116044
- Streinu-Cercel A, Sandulescu O, Preotescu LL, et al. Efficacy and safety of regdanvimab (CT-P59): a phase 2/3 randomized, double-blind, placebo-controlled trial in outpatients with mild-to-moderate coronavirus disease 2019. *Open Forum Infect Dis*. 2022;9:ofac053. [PMID: 35295819] doi:10.1093/ofid/ofac053

35. Hammond J, Leister-Tebbe H, Gardner A, et al; EPIC-HR Investigators. Oral nirmatrelvir for high-risk, nonhospitalized adults with Covid-19. *N Engl J Med*. 2022;386:1397-1408. [PMID: 35172054] doi:10.1056/NEJMoa2118542
36. Korley FK, Durkalski-Mauldin V, Yeatts SD, et al; SIREN-C3PO Investigators. Early convalescent plasma for high-risk outpatients with Covid-19. *N Engl J Med*. 2021;385:1951-60. [PMID: 34407339] doi:10.1056/NEJMoa2103784
37. Alemany A, Millat-Martinez P, Corbacho-Monné M, et al; CONV-ERT Group. High-titre methylene blue-treated convalescent plasma as an early treatment for outpatients with COVID-19: a randomised, placebo-controlled trial. *Lancet Respir Med*. 2022;10:278-88. [PMID: 35150610] doi:10.1016/S2213-2600(21)00545-2
38. Gupta A, Gonzalez-Rojas Y, Juarez E, et al; COMET-ICE Investigators. Effect of sotrovimab on hospitalization or death among high-risk patients with mild to moderate COVID-19: a randomized clinical trial. *JAMA*. 2022;327:1236-46. [PMID: 35285853] doi:10.1001/jama.2022.2832
39. Reis G, Dos Santos Moreira-Silva EA, Silva DCM, et al; TOGETHER investigators. Effect of early treatment with fluvoxamine on risk of emergency care and hospitalisation among patients with COVID-19: the TOGETHER randomised, platform clinical trial. *Lancet Glob Health*. 2022;10:e42-e51. [PMID: 34717820] doi:10.1016/S2214-109X(21)00448-4
40. Lenze EJ, Mattar C, Zorumski CF, et al. Fluvoxamine vs placebo and clinical deterioration in outpatients with symptomatic COVID-19: a randomized clinical trial. *JAMA*. 2020;324:2292-2300. [PMID: 33180097] doi:10.1001/jama.2020.22760
41. Oldenburg CE, Pinsky BA, Brogdon J, et al. Effect of oral azithromycin vs placebo on COVID-19 symptoms in outpatients with SARS-CoV-2 infection: a randomized clinical trial. *JAMA*. 2021;326:490-8. [PMID: 34269813] doi:10.1001/jama.2021.11517
42. Kim JY, Jang YR, Hong JH, et al. Safety, virologic efficacy, and pharmacokinetics of CT-P59, a neutralizing monoclonal antibody against SARS-CoV-2 spike receptor-binding protein: two randomized, placebo-controlled, phase I studies in healthy individuals and patients with mild SARS-CoV-2 infection. *Clin Ther*. 2021;43:1706-27. [PMID: 34551869] doi:10.1016/j.clinthera.2021.08.009
43. Rossignol JF, Bardin MC, Fulgencio J, et al. A randomized double-blind placebo-controlled clinical trial of nitazoxanide for treatment of mild or moderate COVID-19. *EclinicalMedicine*. 2022;45:101310. [PMID: 35237748] doi:10.1016/j.eclinm.2022.101310
44. Gottlieb RL, Vaca CE, Paredes R, et al; GS-US-540-9012 (PINETREE) Investigators. Early remdesivir to prevent progression to severe Covid-19 in outpatients. *N Engl J Med*. 2022;386:305-15. [PMID: 34937145] doi:10.1056/NEJMoa2116846
45. Ezer N, Belga S, Daneman N, et al. Inhaled and intranasal ciclesonide for the treatment of Covid-19 in adult outpatients: CONTAIN phase II randomised controlled trial. *BMJ*. 2021;375:e068060. [PMID: 34728476] doi:10.1136/bmj-2021-068060
46. Sullivan DJ, Gebo KA, Shoham S, et al. Early outpatient treatment for Covid-19 with convalescent plasma. *N Engl J Med*. 2022;386:1700-11. [PMID: 35353960] doi:10.1056/NEJMoa2119657
47. Vallejos J, Zoni R, Bangher M, et al. Ivermectin to prevent hospitalizations in patients with COVID-19 (IVERCOR-COVID19) a randomized, double-blind, placebo-controlled trial. *BMC Infect Dis*. 2021;21:635. [PMID: 34215210] doi:10.1186/s12879-021-06348-5
48. Buonfrate D, Chesini F, Martini D, et al. High-dose ivermectin for early treatment of COVID-19 (COVER study): a randomised, double-blind, multicentre, phase II, dose-finding, proof-of-concept clinical trial. *Int J Antimicrob Agents*. 2022;59:106516. [PMID: 34999239] doi:10.1016/j.ijantimicag.2021.106516
49. Reis G, Silva EASM, Silva DCM, et al; TOGETHER Investigators. Effect of early treatment with ivermectin among patients with Covid-19. *N Engl J Med*. 2022;386:1721-31. [PMID: 35353979] doi:10.1056/NEJMoa2115869
50. Biber A, Harmelin G, Lev D, et al. The effect of ivermectin on the viral load and culture viability in early treatment of nonhospitalized patients with mild COVID-19 - a double-blind, randomized placebo-controlled trial. *Int J Infect Dis*. 2022;122:733-40. [PMID: 35811080] doi:10.1016/j.ijid.2022.07.003
51. Caraco Y, Crofoot GE, Moncada PA, et al. Phase 2/3 trial of molnupiravir for treatment of Covid-19 in nonhospitalized adults. *NEJM Evidence*. 2022;1. doi:10.1056/EVIDoa2100043
52. Mirahmadizadeh A, Semati A, Heiran A, et al. Efficacy of single-dose and double-dose ivermectin early treatment in preventing progression to hospitalization in mild COVID-19: a multi-arm, parallel-group randomized, double-blind, placebo-controlled trial. *Respirology*. 2022;27:758-66. [PMID: 35738778] doi:10.1111/resp.14318
53. Montgomery H, Hobbs FDR, Padilla F, et al; TACKLE study group. Efficacy and safety of intramuscular administration of tixagevimab-cilgavimab for early outpatient treatment of COVID-19 (TACKLE): a phase 3, randomised, double-blind, placebo-controlled trial. *Lancet Respir Med*. 2022;10:985-96. [PMID: 35688164] doi:10.1016/S2213-2600(22)00180-1
54. Rezai MS, Ahangarkani F, Hill A, et al. Non-effectiveness of ivermectin on inpatients and outpatients with COVID-19; results of two randomized, double-blinded, placebo-controlled clinical trials. *Front Med (Lausanne)*. 2022;9:919708. [PMID: 35783616] doi:10.3389/fmed.2022.919708
55. Seo H, Kim H, Bae S, et al. Fluvoxamine treatment of patients with symptomatic COVID-19 in a community treatment center: a preliminary result of randomized controlled trial. *Infect Chemother*. 2022;54:102-13. [PMID: 35384422] doi:10.3947/ic.2021.0142
56. Butler CC, Hobbs FDR, Gbinigie OA, et al. Molnupiravir plus usual care versus usual care alone as early treatment for adults with COVID-19 at increased risk of adverse outcomes (PANORAMIC): preliminary analysis from the United Kingdom randomised, controlled open-label, platform adaptive trial. *SSRN*. Preprint posted online 17 October 2022. doi:10.2139/ssrn.4237902
57. Arora P, Kempf A, Nehlmeier I, et al. Augmented neutralisation resistance of emerging Omicron subvariants BA.2.12.1, BA.4, and BA.5 [Letter]. *Lancet Infect Dis*. 2022;22:1117-8. [PMID: 35777385] doi:10.1016/S1473-3099(22)00422-4
58. Wang Q, Guo Y, Iketani S, et al. Antibody evasion by SARS-CoV-2 Omicron subvariants BA.2.12.1, BA.4 and BA.5. *Nature*. 2022;608:603-8. [PMID: 35790190] doi:10.1038/s41586-022-05053-w
59. Tuekprakhon A, Nutalai R, Djikaite-Guraliuc A, et al; OPTIC Consortium. Antibody escape of SARS-CoV-2 Omicron BA.4 and BA.5 from vaccine and BA.1 serum. *Cell*. 2022;185:2422-2433.e13. [PMID: 35772405] doi:10.1016/j.cell.2022.06.005
60. Global Change Data Lab. Our World in Data. Accessed at [https://ourworldindata.org/grapher/covid-cases-omicron?tab=chart&country=\[APPROX\]USA](https://ourworldindata.org/grapher/covid-cases-omicron?tab=chart&country=[APPROX]USA) on 13 July 2022.
61. Cavazzoni P. Coronavirus (COVID-19) Update: FDA Limits Use of Certain Monoclonal Antibodies to Treat COVID-19 Due to the Omicron Variant. U.S. Food and Drug Administration; 2022. Accessed at [www.fda.gov/news-events/press-announcements/coronavirus-covid-19-update-fda-limits-use-certain-monoclonal-antibodies-treat-covid-19-due-omicron](http://www.fda.gov/news-events/press-announcements/coronavirus-covid-19-update-fda-limits-use-certain-monoclonal-antibodies-treat-covid-19-due-omicron) on 12 June 2022.
62. U.S. Food and Drug Administration. FDA updates Sotrovimab emergency use authorization. Accessed at [www.fda.gov/drugs/drug-safety-and-availability/fda-updates-sotrovimab-emergency-use-authorization](http://www.fda.gov/drugs/drug-safety-and-availability/fda-updates-sotrovimab-emergency-use-authorization) on 12 June 2022.
63. Takashita E, Yamayoshi S, Simon V, et al. Efficacy of antibodies and antiviral drugs against Omicron BA.2.12.1, BA.4, and BA.5 subvariants [Letter]. *N Engl J Med*. 2022;387:468-70. [PMID: 35857646] doi:10.1056/NEJMc2207519
64. Nyberg T, Ferguson NM, Nash SG, et al; COVID-19 Genomics UK (COG-UK) consortium. Comparative analysis of the risks of hospitalisation and death associated with SARS-CoV-2 Omicron (B.1.1.529) and Delta (B.1.617.2) variants in England: a cohort study. *Lancet*.

2022;399:1303-12. [PMID: 35305296] doi:10.1016/S0140-6736(22)00462-7

65. Centers for Disease Control and Prevention. COVID-19 Rebound After Paxlovid Treatment. 24 May 2022. Accessed at [https://emergency.cdc.gov/han/2022/pdf/CDC\\_HAN\\_467.pdf](https://emergency.cdc.gov/han/2022/pdf/CDC_HAN_467.pdf) on 20 September 2022.

66. Deo R, Choudhary MC, Moser C, et al; ACTIV-2/A5401 Study Team. Viral and symptom rebound in untreated COVID-19 infection [Preprint]. med. Rxiv. 2022. [PMID: 35982660] doi:10.1101/2022.08.01.22278278

67. Kaka AS, MacDonald R, Linskens EJ, et al. Major update 2: remdesivir for adults with COVID-19: a living systematic review and meta-analysis for the American College of Physicians practice points. *Ann Intern Med.* 2022;175:701-9. [PMID: 35226522] doi:10.7326/M21-4784

68. Lee TC, Vigod S, Bortolussi-Courval É, et al. Fluvoxamine for outpatient management of COVID-19 to prevent hospitalization: a systematic review and meta-analysis. *JAMA Netw Open.* 2022;5:e226269. [PMID: 35385087] doi:10.1001/jamanetworkopen.2022.6269

69. Castro M. Placebo versus best-available-therapy control group in clinical trials for pharmacologic therapies: which is better. *Proc Am Thorac Soc.* 2007;4:570-3. [PMID: 17878471]

70. Pierre O, Riveros C, Charpy S, et al. Secondary electronic sources demonstrated very good sensitivity for identifying studies evaluating interventions for COVID-19. *J Clin Epidemiol.* 2022;141:46-53. [PMID: 34555426] doi:10.1016/j.jclinepi.2021.09.022

71. Deeks JJ, Higgins JPT, Altman DG. Chapter 10: Analysing data and undertaking meta-analyses. In: Higgins JPT, Thomas J, Chandler J, et al, eds. *Cochrane Handbook for Systematic Reviews of Interventions* Version 6.3. The Cochrane Collaboration; February 2022. Accessed at [www.training.cochrane.org/handbook](http://www.training.cochrane.org/handbook) on 10 November 2022.

72. Li M, Lou F, Fan H. SARS-CoV-2 variant Omicron: currently the most complete "escapee" from neutralization by antibodies and vaccines. *Signal Transduct Target Ther.* 2022;7:28. [PMID: 35091532] doi:10.1038/s41392-022-00880-9

#### PERSONAE PHOTOGRAPHS

*Annals of Internal Medicine* invites submissions of Personae photographs for our cover and offers a \$500 prize for the best photograph submitted each year. Personae photographs are pictures that catch people in the context of their lives and capture personality. Please submit black-and-white, portrait-oriented, digital files (TIFF or JPEG format), at a resolution no less than 300 dpi, to Julie Kostelnik ([jkostelnik@acponline.org](mailto:jkostelnik@acponline.org)).

**Author Contributions:** Conception and design: I. Sommer, G. Gartlehner.

Analysis and interpretation of the data: I. Sommer, A. Dobrescu, D. Ledinger, I. Moser, K. Thaler, E. Persad, M. Fangmeyer, R. Emprechtinger, G. Gartlehner.

Drafting of the article: I. Sommer, A. Dobrescu, D. Ledinger, R. Emprechtinger.

Critical revision for important intellectual content: I. Sommer, A. Dobrescu, D. Ledinger, K. Thaler, E. Persad, I. Klerings, G. Gartlehner.

Final approval of the article: I. Sommer, A. Dobrescu, D. Ledinger, I. Moser, K. Thaler, E. Persad, M. Fangmeyer, R. Emprechtinger, I. Klerings, G. Gartlehner.

Statistical expertise: R. Emprechtinger, G. Gartlehner.

Obtaining of funding: G. Gartlehner.

Administrative, technical, or logistic support: A. Dobrescu.

Collection and assembly of data: I. Sommer, A. Dobrescu, D. Ledinger, I. Moser, K. Thaler, E. Persad, M. Fangmeyer, I. Klerings.

## Supplemental Material\*

Sommer I, Dobrescu A, Ledinger D, et al. Outpatient treatment of confirmed COVID-19. A living, rapid review for the American College of Physicians. *Ann Intern Med.* 29 November 2022. [Epub ahead of print]. doi:10.7326/M22-2202

### Contents

|                                                                                                       |           |
|-------------------------------------------------------------------------------------------------------|-----------|
| <b>Supplement Table 1: Inclusion and Exclusion Criteria</b> .....                                     | <b>3</b>  |
| <b>Supplement Table 2: Search Strategy</b> .....                                                      | <b>5</b>  |
| <b>Supplement Table 3: List of Eligible Preprints</b> .....                                           | <b>9</b>  |
| <b>Supplement Table 4: List of Ongoing Studies</b> .....                                              | <b>11</b> |
| <b>Supplement Table 5: Excluded Studies</b> .....                                                     | <b>16</b> |
| Ineligible Study Design (n=1) .....                                                                   | 16        |
| Ineligible Publication Type (n=112) .....                                                             | 16        |
| Ineligible Population (n=34) .....                                                                    | 24        |
| Ineligible Intervention (n=13) .....                                                                  | 26        |
| Ineligible Comparison (n=30) .....                                                                    | 27        |
| Ineligible Outcome (n=4) .....                                                                        | 29        |
| Fulltext Unretrievable (n=3) .....                                                                    | 30        |
| Ineligible Setting (n=12) .....                                                                       | 30        |
| <b>Supplement Table 6: Study Characteristics of Included Studies</b> .....                            | <b>31</b> |
| <b>Supplement Table 7: Definitions for Recovery</b> .....                                             | <b>55</b> |
| <b>Supplement Figure 1: Risk of Bias</b> .....                                                        | <b>56</b> |
| <b>Supplement Figures Summary Plots</b> .....                                                         | <b>57</b> |
| <b>Supplement Figure 2: All-Cause Mortality – Summary Plot</b> .....                                  | <b>57</b> |
| <b>Supplement Figure 3: Serious Adverse Events – Summary Plot</b> .....                               | <b>58</b> |
| <b>Supplement Figures Meta Analyses</b> .....                                                         | <b>59</b> |
| <b>Supplement Figure 4: Serious Adverse Events: Molnupiravir Versus Placebo</b> .....                 | <b>59</b> |
| <b>Supplement Figure 5: Any Adverse Events: Molnupiravir Versus Placebo</b> .....                     | <b>59</b> |
| <b>Supplement Figure 6: Any Adverse Events: Regdanvimab Versus Placebo</b> .....                      | <b>59</b> |
| <b>Supplement Figure 7: Admission to Hospital due to COVID-19: Chloroquine Versus Placebo</b> .....   | <b>60</b> |
| <b>Supplement Figure 8: Serious Adverse Events: Chloroquine Versus Placebo</b> .....                  | <b>60</b> |
| <b>Supplement Figure 9: All-Cause Mortality: Ivermectin Versus Placebo</b> .....                      | <b>60</b> |
| <b>Supplement Figure 10: Recovery: Ivermectin Versus Placebo</b> .....                                | <b>61</b> |
| <b>Supplement Figure 11: Admission to Hospital due to COVID-19: Ivermectin Versus Placebo</b> .....   | <b>61</b> |
| <b>Supplement Figure 12: Any Adverse Events: Ivermectin Versus Placebo</b> .....                      | <b>61</b> |
| <b>Supplement Figure 13: Admission to Hospital due to COVID-19: Nitazoxanide Versus Placebo</b> ..... | <b>62</b> |
| <b>Supplement Figure 14: Serious Adverse Events: Nitazoxanide Versus Placebo</b> .....                | <b>62</b> |
| <b>Supplement Figure 15: Any Adverse Events: Nitazoxanide Versus Placebo</b> .....                    | <b>62</b> |
| <b>Supplement Figure 16: All-Cause Mortality: Convalescent Plasma Versus Placebo</b> .....            | <b>63</b> |
| <b>Supplement Figure 17: Serious Adverse Events: Convalescent Plasma Versus Placebo</b> .....         | <b>63</b> |
| <b>Supplement Figure 18: All-Cause Mortality: Fluvoxamine Versus Placebo</b> .....                    | <b>63</b> |

**Supplement Figure 19: Admission to Hospital due to COVID-19: Fluvoxamine Versus Placebo.....64**  
**Supplement Table 8: Summary of Findings Tables .....65**  
**Supplement Table 9: Subgroup Results .....79**  
**Supplement Table 10: Studies Identified in First Surveillance Search (August 17, 2022) ....83**  
**References .....85**

\* This supplemental material was provided by the authors to give readers further details on their article. The material was not copyedited.



## Supplement Table 1: Inclusion and Exclusion Criteria

| Category             | Criteria                                                                                                                                                                                                                                                                                                                                                                                                                                                                                                                                                                      |                                                                                                                                                                                                                                                                                                                                                                                                                                        |
|----------------------|-------------------------------------------------------------------------------------------------------------------------------------------------------------------------------------------------------------------------------------------------------------------------------------------------------------------------------------------------------------------------------------------------------------------------------------------------------------------------------------------------------------------------------------------------------------------------------|----------------------------------------------------------------------------------------------------------------------------------------------------------------------------------------------------------------------------------------------------------------------------------------------------------------------------------------------------------------------------------------------------------------------------------------|
|                      | Inclusion                                                                                                                                                                                                                                                                                                                                                                                                                                                                                                                                                                     | Exclusion                                                                                                                                                                                                                                                                                                                                                                                                                              |
| Population           | Adult (18 years or older) outpatients of all races and ethnicities with a symptomatic or asymptomatic, and confirmed diagnosis of COVID-19 (PCR or antigen detected) <sup>1</sup>                                                                                                                                                                                                                                                                                                                                                                                             | <ul style="list-style-type: none"> <li>• Children under age 18</li> <li>• Adults hospitalized due to COVID-19</li> <li>• Adults with confirmed diagnosis of other severe corona viruses such as severe acute respiratory syndrome (SARS) or Middle East respiratory syndrome (MERS), or other viral respiratory diseases, such as influenza.</li> <li>• Adults who were exposed to SARS-CoV-2 without a confirmed infection</li> </ul> |
|                      | <b>Subgroups of interest are based on:</b> <ul style="list-style-type: none"> <li>• patient characteristics (age, gender, comorbidities)</li> <li>• immunity status (prior SARS-CoV-2 infection, vaccination status, time since infection/vaccination)</li> <li>• type of SARS-CoV-2 variant</li> <li>• symptom duration</li> <li>• symptom severity</li> </ul>                                                                                                                                                                                                               |                                                                                                                                                                                                                                                                                                                                                                                                                                        |
| Interventions        | <ul style="list-style-type: none"> <li>• chloroquine/hydroxychloroquine</li> <li>• convalescent plasma</li> <li>• lopinavir/ritonavir</li> <li>• ivermectin</li> <li>• molnupiravir</li> <li>• monoclonal antibodies approved by FDA or EMA at search date (bebtelovimab, tixagevimab+cilgavimab, sotrovimab, casirivimab+imdevimab, regdanvimab)</li> <li>• nirmatrelvir + ritonavir (Paxlovid)</li> <li>• nitazoxanide</li> <li>• remdesivir</li> <li>• fluvoxamine</li> <li>• antibiotics (azithromycin only)</li> <li>• corticosteroids (inhaled and systemic)</li> </ul> | <ul style="list-style-type: none"> <li>• Adjunct COVID-19 treatments (e.g. anticoagulants/ antiplatelet therapy, vitamins)</li> <li>• Combinations of interventions (except those approved as pair of agents e.g. casirivimab plus imdevimab [REGEN-COV])</li> <li>• Antibiotics other than azithromycin</li> </ul>                                                                                                                    |
| Control intervention | <ul style="list-style-type: none"> <li>• Placebo</li> <li>• Usual care if no placebo-controlled study is available (as defined by study authors)</li> <li>• Different dose or duration of same treatment (if placebo group is present)</li> <li>• Dose: doses that are within the approved dosing range. For drugs that are not approved for COVID, apply doses approved for other indications.</li> <li>• Duration: use the duration defined for the primary outcome in the registration of the trial.</li> </ul>                                                            | <ul style="list-style-type: none"> <li>• Usual care</li> <li>• No treatment</li> <li>• Different treatments</li> </ul>                                                                                                                                                                                                                                                                                                                 |
| Outcomes             | <ul style="list-style-type: none"> <li>• All-cause mortality</li> <li>• COVID-19 specific mortality</li> <li>• Recovery/Clinical improvement</li> <li>• Time to recovery/time to clinical improvement</li> </ul>                                                                                                                                                                                                                                                                                                                                                              | <ul style="list-style-type: none"> <li>• Studies that do not include at least one of the outcomes listed under the inclusion criteria</li> </ul>                                                                                                                                                                                                                                                                                       |

|                        |                                                                                                                                                                                                                                                                          |                                                                                                                                                                                                                                                                                                                          |
|------------------------|--------------------------------------------------------------------------------------------------------------------------------------------------------------------------------------------------------------------------------------------------------------------------|--------------------------------------------------------------------------------------------------------------------------------------------------------------------------------------------------------------------------------------------------------------------------------------------------------------------------|
|                        | <ul style="list-style-type: none"> <li>• Admission to hospital due to COVID-19</li> <li>• Incidence of adverse events (e.g., headache, fatigue, cough)</li> <li>• Incidence of serious adverse events (e.g. anaphylaxis) according to the FDA definition (73)</li> </ul> |                                                                                                                                                                                                                                                                                                                          |
| Timing of intervention | No limitations                                                                                                                                                                                                                                                           |                                                                                                                                                                                                                                                                                                                          |
| Geography              | No limitations                                                                                                                                                                                                                                                           |                                                                                                                                                                                                                                                                                                                          |
| Settings               | <ul style="list-style-type: none"> <li>• Outpatient settings (90%)</li> </ul>                                                                                                                                                                                            | <ul style="list-style-type: none"> <li>• Inpatient settings</li> </ul>                                                                                                                                                                                                                                                   |
| Publication language   | <ul style="list-style-type: none"> <li>• English</li> </ul>                                                                                                                                                                                                              | <ul style="list-style-type: none"> <li>• All other languages</li> </ul>                                                                                                                                                                                                                                                  |
| Study design           | 1. RCTs                                                                                                                                                                                                                                                                  | <ul style="list-style-type: none"> <li>• Nonrandomized controlled trials</li> <li>• Cohort studies</li> <li>• Case-control studies</li> <li>• Case series</li> <li>• Case reports</li> <li>• Nonsystematic reviews</li> <li>• Studies without a control group</li> <li>• Systematic reviews and meta-analyses</li> </ul> |
| Publication type       | Any peer-reviewed publication reporting primary data                                                                                                                                                                                                                     | Abstracts, preprints, publications not reporting primary data (e.g., protocols)                                                                                                                                                                                                                                          |

EMA = European Medicines Agency; FDA = Food and Drug Administration; PCR = Polymerase Chain Reaction; RCT = randomized controlled trial.

## Supplement Table 2: Search Strategy

COVID-19 L-OVE (<https://app.iloveevidence.com/loves/5e6fdb9669c00e4ac072701d>)

4<sup>th</sup> April 2022

| Classification                                  | Search within these results                                                               | Document type                        | Results |
|-------------------------------------------------|-------------------------------------------------------------------------------------------|--------------------------------------|---------|
| Hydroxychloroquine sulfate for (any Population) | mild OR moderate OR early OR outpatient* OR out-patient* OR non-hospital* OR nonhospital* | Randomised trials reporting data     | 76      |
| Hydroxychloroquine sulfate for (any Population) | mild OR moderate OR early OR outpatient* OR out-patient* OR non-hospital* OR nonhospital* | Randomised trials not reporting data | 90      |
| Hydroxychloroquine sulfate for (any Population) | mild OR moderate OR early OR outpatient* OR out-patient* OR non-hospital* OR nonhospital* | Articles awaiting assessment         | 10      |
| Chloroquine for (any Population)                | mild OR moderate OR early OR outpatient* OR out-patient* OR non-hospital* OR nonhospital* | Randomised trials reporting data     | 8       |
| Chloroquine for (any Population)                | mild OR moderate OR early OR outpatient* OR out-patient* OR non-hospital* OR nonhospital* | Randomised trials not reporting data | 28      |
| Chloroquine for (any Population)                | mild OR moderate OR early OR outpatient* OR out-patient* OR non-hospital* OR nonhospital* | Articles awaiting assessment         | 10      |
| Convalescent plasma for (any Population)        | mild OR moderate OR early OR outpatient* OR out-patient* OR non-hospital* OR nonhospital* | Randomised trials reporting data     | 29      |
| Convalescent plasma for (any Population)        | mild OR moderate OR early OR outpatient* OR out-patient* OR non-hospital* OR nonhospital* | Randomised trials not reporting data | 36      |
| Convalescent plasma for (any Population)        | mild OR moderate OR early OR outpatient* OR out-patient* OR non-hospital* OR nonhospital* | Articles awaiting assessment         | 11      |
| Lopinavir for (any Population)                  | mild OR moderate OR early OR outpatient* OR out-patient* OR non-hospital* OR nonhospital* | Randomised trials reporting data     | 22      |
| Lopinavir for (any Population)                  | mild OR moderate OR early OR outpatient* OR out-patient* OR non-hospital* OR nonhospital* | Randomised trials not reporting data | 31      |
| Lopinavir for (any Population)                  | mild OR moderate OR early OR outpatient* OR out-patient* OR non-hospital* OR nonhospital* | Articles awaiting assessment         | 6       |
| Ritonavir for (any Population)                  | mild OR moderate OR early OR outpatient* OR out-patient* OR non-hospital* OR nonhospital* | Randomised trials reporting data     | 27      |
| Ritonavir for (any Population)                  | mild OR moderate OR early OR outpatient* OR out-patient* OR non-hospital* OR nonhospital* | Randomised trials not reporting data | 40      |

| Classification                              | Search within these results                                                               | Document type                        | Results |
|---------------------------------------------|-------------------------------------------------------------------------------------------|--------------------------------------|---------|
| Ritonavir for (any Population)              | mild OR moderate OR early OR outpatient* OR out-patient* OR non-hospital* OR nonhospital* | Articles awaiting assessment         | 9       |
| Ivermectin for (any Population)             | mild OR moderate OR early OR outpatient* OR out-patient* OR non-hospital* OR nonhospital* | Randomised trials reporting data     | 41      |
| Ivermectin for (any Population)             | mild OR moderate OR early OR outpatient* OR out-patient* OR non-hospital* OR nonhospital* | Randomised trials not reporting data | 49      |
| Ivermectin for (any Population)             | mild OR moderate OR early OR outpatient* OR out-patient* OR non-hospital* OR nonhospital* | Articles awaiting assessment         | 7       |
| Molnupiravir for (any Population)           | mild OR moderate OR early OR outpatient* OR out-patient* OR non-hospital* OR nonhospital* | Randomised trials reporting data     | 9       |
| Molnupiravir for (any Population)           | mild OR moderate OR early OR outpatient* OR out-patient* OR non-hospital* OR nonhospital* | Randomised trials not reporting data | 17      |
| Molnupiravir for (any Population)           | mild OR moderate OR early OR outpatient* OR out-patient* OR non-hospital* OR nonhospital* | Articles awaiting assessment         | 4       |
| Bebtelovimab for (any Population)           | mild OR moderate OR early OR outpatient* OR out-patient* OR non-hospital* OR nonhospital* | Randomised trials reporting data     | 1       |
| Bebtelovimab for (any Population)           | mild OR moderate OR early OR outpatient* OR out-patient* OR non-hospital* OR nonhospital* | Randomised trials not reporting data | 0       |
| Bebtelovimab for (any Population)           | mild OR moderate OR early OR outpatient* OR out-patient* OR non-hospital* OR nonhospital* | Articles awaiting assessment         | 0       |
| Tixagevimab/cilgavimab for (any Population) |                                                                                           | Randomised trials reporting data     | 2       |
| Tixagevimab/cilgavimab for (any Population) | mild OR moderate OR early OR outpatient* OR out-patient* OR non-hospital* OR nonhospital* | Randomised trials not reporting data | 4       |
| Tixagevimab/cilgavimab for (any Population) |                                                                                           | Articles awaiting assessment         | 0       |
| Sotrovimab for COVID-19                     |                                                                                           | Randomised trials reporting data     | 8       |
| Sotrovimab for COVID-19                     | mild OR moderate OR early OR outpatient* OR out-patient* OR non-hospital* OR nonhospital* | Randomised trials not reporting data | 9       |
| Sotrovimab for COVID-19                     |                                                                                           | Articles awaiting assessment         | 4       |

| Classification                            | Search within these results                                                               | Document type                        | Results |
|-------------------------------------------|-------------------------------------------------------------------------------------------|--------------------------------------|---------|
| Casirivimab and/or imdevimab for COVID-19 | mild OR moderate OR early OR outpatient* OR out-patient* OR non-hospital* OR nonhospital* | Randomised trials reporting data     | 16      |
| Casirivimab and/or imdevimab for COVID-19 | mild OR moderate OR early OR outpatient* OR out-patient* OR non-hospital* OR nonhospital* | Randomised trials not reporting data | 6       |
| Casirivimab and/or imdevimab for COVID-19 |                                                                                           | Articles awaiting assessment         | 7       |
| Regdanvimab for COVID-19                  |                                                                                           | Randomised trials reporting data     | 4       |
| Regdanvimab for COVID-19                  |                                                                                           | Randomised trials not reporting data | 6       |
| Regdanvimab for COVID-19                  |                                                                                           | Articles awaiting assessment         | 0       |
| Nirmatrelvir for COVID-19                 |                                                                                           | Randomised trials reporting data     | 5       |
| Nirmatrelvir for COVID-19                 |                                                                                           | Randomised trials not reporting data | 8       |
| Nirmatrelvir for COVID-19                 |                                                                                           | Articles awaiting assessment         | 4       |
| Nitazoxanide for COVID-19                 |                                                                                           | Randomised trials reporting data     | 10      |
| Nitazoxanide for COVID-19                 | mild OR moderate OR early OR outpatient* OR out-patient* OR non-hospital* OR nonhospital* | Randomised trials not reporting data | 15      |
| Nitazoxanide for COVID-19                 |                                                                                           | Articles awaiting assessment         | 2       |
| Remdesivir for COVID-19                   | mild OR moderate OR early OR outpatient* OR out-patient* OR non-hospital* OR nonhospital* | Randomised trials reporting data     | 15      |
| Remdesivir for COVID-19                   | mild OR moderate OR early OR outpatient* OR out-patient* OR non-hospital* OR nonhospital* | Randomised trials not reporting data | 14      |
| Remdesivir for COVID-19                   | mild OR moderate OR early OR outpatient* OR out-patient* OR non-hospital* OR nonhospital* | Articles awaiting assessment         | 10      |
| Fluvoxamine for COVID-19                  |                                                                                           | Randomised trials reporting data     | 6       |

| Classification               | Search within these results                                                               | Document type                        | Results |
|------------------------------|-------------------------------------------------------------------------------------------|--------------------------------------|---------|
| Fluvoxamine for COVID-19     | mild OR moderate OR early OR outpatient* OR out-patient* OR non-hospital* OR nonhospital* | Randomised trials not reporting data | 10      |
| Fluvoxamine for COVID-19     |                                                                                           | Articles awaiting assessment         | 2       |
| Azithromycin for COVID-19    | mild OR moderate OR early OR outpatient* OR out-patient* OR non-hospital* OR nonhospital* | Randomised trials reporting data     | 16      |
| Azithromycin for COVID-19    | mild OR moderate OR early OR outpatient* OR out-patient* OR non-hospital* OR nonhospital* | Randomised trials not reporting data | 30      |
| Azithromycin for COVID-19    | mild OR moderate OR early OR outpatient* OR out-patient* OR non-hospital* OR nonhospital* | Articles awaiting assessment         | 6       |
| Corticosteroids for COVID-19 | mild OR moderate OR early OR outpatient* OR out-patient* OR non-hospital* OR nonhospital* | Randomised trials reporting data     | 43      |
| Corticosteroids for COVID-19 | mild OR moderate OR early OR outpatient* OR out-patient* OR non-hospital* OR nonhospital* | Randomised trials not reporting data | 70      |
| Corticosteroids for COVID-19 | mild OR moderate OR early OR outpatient* OR out-patient* OR non-hospital* OR nonhospital* | Articles awaiting assessment         | 30      |
|                              |                                                                                           |                                      |         |
|                              |                                                                                           | Total                                | 923     |

### Supplement Table 3: List of Eligible Preprints

| Author, Year                          | Title<br>Trial name                                                                                                                                                                                   | Registration number |
|---------------------------------------|-------------------------------------------------------------------------------------------------------------------------------------------------------------------------------------------------------|---------------------|
| <b>Antiviral drugs</b>                |                                                                                                                                                                                                       |                     |
| <i>Lopinavir/Ritonavir</i>            |                                                                                                                                                                                                       |                     |
| Lowe, 2022(74)                        | Favipiravir, lopinavir-ritonavir or combination therapy (FLARE): a randomised, double blind, 2x2 factorial placebo-controlled trial of early antiviral therapy in COVID-19<br>FLARE                   | NCT04499677         |
| <b>Monoclonal antibodies</b>          |                                                                                                                                                                                                       |                     |
| <i>Bebtelovimab</i>                   |                                                                                                                                                                                                       |                     |
| Dougan, 2022 (75)                     | Bebtelovimab, alone or together with bamlanivimab and etesevimab, as a broadly neutralizing monoclonal antibody treatment for mild to moderate, ambulatory COVID-19<br>NR                             | NCT04634409         |
| <i>Chloroquine/Hydroxychloroquine</i> |                                                                                                                                                                                                       |                     |
| Amaravadi, 2021(76)                   | Hydroxychloroquine for SARS-CoV-2 positive patients quarantined at home: The first interim analysis of a remotely conducted randomized clinical trial<br>NR                                           | NCT04329923         |
| <i>Ivermectin</i>                     |                                                                                                                                                                                                       |                     |
| Biber, 2021(77)                       | Favorable outcome on viral load and culture viability using Ivermectin in early treatment of non-hospitalized patients with mild COVID-19 – A double-blind, randomized placebo-controlled trial<br>NR | NCT044297411        |
| Mohan, 2021(78)                       | Ivermectin in mild and moderate COVID-19 (RIVET-COV): a randomized, placebo-controlled trial<br>RIVET-COV                                                                                             | CTRI/2020/06/026001 |
| <i>Nitazoxanide</i>                   |                                                                                                                                                                                                       |                     |
| Silva, 2021(79)                       | Efficacy of Nitazoxanide in reducing the viral load in COVID-19 patients. Randomized, placebo-controlled, single-blinded, parallel group, pilot study<br>NR                                           | NCT04463264         |
| <b>Other drugs</b>                    |                                                                                                                                                                                                       |                     |
| <i>Corticosteroids</i>                |                                                                                                                                                                                                       |                     |
| Clemency, 2021(80)                    | A randomized controlled trial of inhaled ciclesonide for outpatient treatment of symptomatic COVID-19 infections<br>NR                                                                                | NCT04377711         |

| Author, Year                          | Title<br>Trial name                                                                                                                                                                                       | Registration number |
|---------------------------------------|-----------------------------------------------------------------------------------------------------------------------------------------------------------------------------------------------------------|---------------------|
| <b>Antiviral drugs</b>                |                                                                                                                                                                                                           |                     |
| <b>Lopinavir/Ritonavir</b>            |                                                                                                                                                                                                           |                     |
| Lowe, 2022(74)                        | Favipiravir, lopinavir-ritonavir or combination therapy (FLARE): a randomised, double blind, 2x2 factorial placebo-controlled trial of early antiviral therapy in COVID-19<br><br>FLARE                   | NCT04499677         |
| <b>Monoclonal antibodies</b>          |                                                                                                                                                                                                           |                     |
| <b>Bebtelovimab</b>                   |                                                                                                                                                                                                           |                     |
| Dougan, 2022(75)                      | Bebtelovimab, alone or together with bamlanivimab and etesevimab, as a broadly neutralizing monoclonal antibody treatment for mild to moderate, ambulatory COVID-19<br><br>NR                             | NCT04634409         |
| <b>Chloroquine/Hydroxychloroquine</b> |                                                                                                                                                                                                           |                     |
| Amaravadi, 2021(76)                   | Hydroxychloroquine for SARS-CoV-2 positive patients quarantined at home: The first interim analysis of a remotely conducted randomized clinical trial<br><br>NR                                           | NCT04329923         |
| <b>Ivermectin</b>                     |                                                                                                                                                                                                           |                     |
| Biber, 2021(77)                       | Favorable outcome on viral load and culture viability using Ivermectin in early treatment of non-hospitalized patients with mild COVID-19 – A double-blind, randomized placebo-controlled trial<br><br>NR | NCT044297411        |
| Mohan, 2021(78)                       | Ivermectin in mild and moderate COVID-19 (RIVET-COV): a randomized, placebo-controlled trial<br><br>RIVET-COV                                                                                             | CTRI/2020/06/026001 |
| <b>Nitazoxanide</b>                   |                                                                                                                                                                                                           |                     |
| Silva, 2021(79)                       | Efficacy of Nitazoxanide in reducing the viral load in COVID-19 patients. Randomized, placebo-controlled, single-blinded, parallel group, pilot study<br><br>NR                                           | NCT04463264         |
| <b>Other drugs</b>                    |                                                                                                                                                                                                           |                     |
| <b>Corticosteroids</b>                |                                                                                                                                                                                                           |                     |
| Clemency, 2021(80)                    | A randomized controlled trial of inhaled ciclesonide for outpatient treatment of symptomatic COVID-19 infections<br><br>NR                                                                                | NCT04377711         |



## Supplement Table 4: List of Ongoing Studies

| Title                                                                                                                                                                                                                                                                                                          | Study Completion Date <sup>a</sup> |
|----------------------------------------------------------------------------------------------------------------------------------------------------------------------------------------------------------------------------------------------------------------------------------------------------------------|------------------------------------|
| Registration Number                                                                                                                                                                                                                                                                                            |                                    |
| Trial Name                                                                                                                                                                                                                                                                                                     |                                    |
| <i>Antiviral drugs</i>                                                                                                                                                                                                                                                                                         |                                    |
| <i>Lopinavir/Ritonavir</i>                                                                                                                                                                                                                                                                                     |                                    |
| Adaptive Randomized trial for therapy of CORona virus disease 2019 at home with oral antivirals<br><a href="#">EudraCT 2020-001528-32</a>                                                                                                                                                                      | NR                                 |
| Trial of Early Therapies During Non-hospitalized Outpatient Window for COVID-19<br><a href="#">NCT04372628</a>                                                                                                                                                                                                 | June 1, 2022                       |
| A randomized, open-label study to evaluate the efficacy and safety of Lopinavir-Ritonavir in patients with mild novel coronavirus pneumonia (COVID-19)<br><a href="#">ChiCTR2000029539</a>                                                                                                                     | February 2, 2021                   |
| <i>Molnupiravir</i>                                                                                                                                                                                                                                                                                            |                                    |
| Efficacy and Safety of Molnupiravir (MK-4482) in Non-Hospitalized Adult Participants With COVID-19 (MK-4482-002)<br><a href="#">NCT04575597</a>                                                                                                                                                                | May 5, 2022                        |
| <i>Nirmatrelvir/Ritonavir</i>                                                                                                                                                                                                                                                                                  |                                    |
| An interventional efficacy and safety, phase 2/3, double-blind, 2 arm study to investigate orally administered pf 07321332/ritonavir compared with placebo in nonhospitalized symptomatic adult participants with covid-19 who are at low risk of progressing to severe illness<br><a href="#">NCT05011513</a> | November 30, 2022                  |
| <i>Remdesivir</i>                                                                                                                                                                                                                                                                                              |                                    |
| A Phase 1b/2a Study in Participants With Early Stage COVID-19 to Evaluate the Safety, Efficacy, and Pharmacokinetics of Remdesivir Administered by Inhalation<br><a href="#">NCT04539262</a>                                                                                                                   | March 22, 2021                     |
| WHO Public Health Emergency "Solidarity" Clinical Trial for COVID-19 Treatments<br><a href="#">NCT04647669</a>                                                                                                                                                                                                 | December 31, 2021                  |
| <i>Monoclonal antibodies</i>                                                                                                                                                                                                                                                                                   |                                    |
| <i>Casirivimab/Imdevimab</i>                                                                                                                                                                                                                                                                                   |                                    |
| Adaptive Platform Treatment Trial for Outpatients With COVID-19 (Adapt Out COVID)<br><a href="#">NCT04518410</a>                                                                                                                                                                                               | June 22, 2023                      |
| A Phase 2 Study to Assess the Virologic Efficacy of REGN10933+REGN10987 Across Different Dose Regimens in Outpatients With SARS-CoV-2 Infection<br><a href="#">NCT04666441</a>                                                                                                                                 | September 21, 2021                 |
| Adaptive, randomized, placebo-controlled trial to evaluate the efficacy of monoclonal antibodies in outpatients with mild or moderate COVID-19<br><a href="#">EudraCT 2021-002612-31</a>                                                                                                                       | NR                                 |
| <i>Tixagevimab/cilgavimab</i>                                                                                                                                                                                                                                                                                  |                                    |
| A Phase III Randomized, Double-blind, Placebo-controlled, Multicenter Study to Determine the Safety and Efficacy of AZD7442 for the Treatment of COVID-19 in Non-hospitalized Adults<br><a href="#">NCT04723394</a>                                                                                            | October 21, 2022                   |

| Title                                                                                                                                                                                                                                                                                                                             | Study Completion Date <sup>a</sup> |
|-----------------------------------------------------------------------------------------------------------------------------------------------------------------------------------------------------------------------------------------------------------------------------------------------------------------------------------|------------------------------------|
| Registration Number                                                                                                                                                                                                                                                                                                               |                                    |
| Trial Name                                                                                                                                                                                                                                                                                                                        |                                    |
| <i>Antibiotic or antiparasitic drugs</i>                                                                                                                                                                                                                                                                                          |                                    |
| <i>Azithromycin</i>                                                                                                                                                                                                                                                                                                               |                                    |
| <i>Chloroquine/hydroxychloroquine</i>                                                                                                                                                                                                                                                                                             |                                    |
| Preventing SARS-CoV-2 virus infection and severity of COVID-19 diseases during pregnancy with hydroxychloroquine<br><a href="#">EudraCT 2020-001587-29</a>                                                                                                                                                                        | NR                                 |
| Pilot trial on early treatment with hydroxychloroquine in patients with COVID-19 who do not have hospital admission at diagnosis.<br><a href="#">EudraCT 2020-002449-41</a>                                                                                                                                                       | NR                                 |
| Effectiveness of Hydroxychloroquine in Covid-19 Patients: A Single Centred Single-blind RCT Study<br><a href="#">NCT04328272</a>                                                                                                                                                                                                  | June 28, 2020                      |
| Hydroxychloroquine for Outpatients With Confirmed COVID-19<br><a href="#">NCT04342169</a>                                                                                                                                                                                                                                         | November 3, 2021                   |
| Pragmatic, Double-blind, Placebo-controlled Randomized Clinical Trial, Evaluating Hydroxychloroquine for Prevention of Hospitalization and Respiratory Complications in Non-hospitalized Patients With Confirmed or Probable COVID-19<br><a href="#">NCT04466540</a>                                                              | September 28, 2021                 |
| Double-blind, Randomized, Prospective, Parallel Study to Demonstrate the Efficacy and Safety of Outpatient Treatment of the Fixed Combination of Hydroxychloroquine With Azithromycin Versus Hydroxychloroquine Treatment and Placebo Treatment in Patients Diagnosed With Mild COVID-19 Infection<br><a href="#">NCT04964583</a> | August 2021                        |
| Efficacy and Safety of the Use of Hydroxychloroquine, Favipiravir or Hydroxychloroquine + Favipiravir in Early SARS-CoV-2 (COVID-19) Treatment<br><a href="#">NCT04981379</a>                                                                                                                                                     | February 16, 2021                  |
| Adaptive Randomized trial for therapy of Corona virus disease 2019 at home with oral antivirals<br><a href="#">EudraCT 2020-001528-32</a>                                                                                                                                                                                         | NR                                 |
| <i>Ivermectin</i>                                                                                                                                                                                                                                                                                                                 |                                    |
| ACTIV-6: COVID-19 Outpatient Randomized Trial to Evaluate Efficacy of Repurposed Medications<br><a href="#">NCT04885530</a>                                                                                                                                                                                                       | March 2023                         |
| Prevention and Treatment for COVID -19 Associated Severe Pneumonia in The Gambia: a Single-Blinded Randomised Clinical Trial<br><a href="#">NCT04703608</a>                                                                                                                                                                       | July 2022                          |
| Ivermectin and Doxycycline in Combination or Ivermectin Alone for the Treatment of Adult Bangladeshi Patients Hospitalized for COVID-19: a Randomised, Double-blind, Placebo-controlled Trial.<br><a href="#">NCT04407130</a>                                                                                                     | November 20, 2020                  |
| Multicenter, Double-blind, Randomized, Placebo-controlled Study to Assess the Efficacy, Safety and Tolerability of Ivermectin in Mild Virus-positive Subjects (SARS-CoV)-2 With or Without Symptoms<br><a href="#">NCT04407507</a>                                                                                                | January 29, 2021                   |

| Title<br>Registration Number<br>Trial Name                                                                                                                                                                                                                            | Study Completion Date <sup>a</sup> |
|-----------------------------------------------------------------------------------------------------------------------------------------------------------------------------------------------------------------------------------------------------------------------|------------------------------------|
| A Randomized Double-blinded Placebo-controlled Outpatient Clinical Trial in High Risk Population Confirmed COVID-19 Patients Using Ivermectin and Doxycycline to Prevent COVID-19 Illness-related Hospitalization<br><a href="#">NCT04729140</a>                      | March 28, 2022                     |
| Efficacy of Ivermectin in Outpatients With Non-severe COVID-19: A Randomized Controlled Trial<br><a href="#">NCT04834115</a>                                                                                                                                          | May 30, 2021                       |
| Randomized, Double-blind, Placebo-controlled Clinical Trial to Study the Efficacy and Therapeutic Safety of Ivermectin Versus Placebo Associated With Standard of Care Treatment in the Early Phase of Coronavirus Infection (COVID19)<br><a href="#">NCT04836299</a> | December 5, 2021                   |
| Safety and Efficacy and of Ivermectin for the Prevention of Severe Disease in Patients With COVID-19: A Randomized, Controlled, Double-Blind Clinical Study.<br><a href="#">NCT04886362</a>                                                                           | December 2021                      |
| Randomized phase iia clinical trial to compare the efficacy of ivermectin versus placebo to obtain negative pcr results in patients with early phase COVID-19<br><a href="#">EC INS No PER-034-20</a>                                                                 | NR                                 |
| A Placebo-controlled, Randomized, Double-blind Study in COvid-19 Patients With iveRmectin; An inVEstigator iniTiaTED Trial<br><a href="#">NCT04703205</a>                                                                                                             | May 31, 2022                       |
| A randomized double-blind placebo-controlled trial of oral ivermectin for outpatient treatment of those at high risk for hospitalization due to COVID-19<br><a href="#">ACTRN12620000982910</a>                                                                       | NR                                 |
| Ivermectin Treatment Efficacy in Covid-19 High Risk Patients (I-TECH Study): A Multicenter Open-label Randomized Controlled Trial<br><a href="#">NCT04920942</a>                                                                                                      | October 31, 2021                   |
| A randomized control trial to assess the efficacy and safety of ivermectin in the treatment of mild to moderate COVID 19 patients<br><a href="#">SLCTR/2021/020</a> and <a href="#">EC-21-EM02</a> and <a href="#">U1111-1266-8924</a>                                | NR                                 |
| Randomized Phase IIA Clinical Trial to Evaluate the Efficacy of Ivermectin to Obtain Negative PCR Results in Patients With Early Phase COVID-19<br><a href="#">NCT04635943</a>                                                                                        | April 30, 2021                     |
| Evaluation of the effect of Ivermectin in treatment of outpatients with COVID-19<br><a href="#">IRCT20111224008507N4</a>                                                                                                                                              | NR                                 |
| Effectiveness of Ivermectin on Outpatient Treatment of Covid-19 Patients<br><a href="#">IRCT20210213050344N1</a>                                                                                                                                                      | NR                                 |
| A randomized, double-blind, placebo-controlled study to assess the safety and efficacy of ivermectin in asymptomatic and mild severity COVID-19 patients<br><a href="#">EudraCT 2021-000166-15</a>                                                                    | NR                                 |

| Title<br>Registration Number<br>Trial Name                                                                                                                                                                                                                                                                                               | Study Completion Date <sup>a</sup> |
|------------------------------------------------------------------------------------------------------------------------------------------------------------------------------------------------------------------------------------------------------------------------------------------------------------------------------------------|------------------------------------|
| Ivermectin vs. Placebo for the Treatment of Patients With Mild to Moderate COVID-19 to Prevent Progression to Severe Infection and to Decrease Viral Shedding - A Double Blind , Randomized Controlled Trial<br><br><a href="#">NCT04429711</a>                                                                                          | October 31, 2020                   |
| Evaluation of the Impact of the Administration of Single Dose of Ivermectin in the Early Phase of COVID-19 on the Time to Negativation of the SARS-COV-2 Viral Load Determinated by RT-PCR<br><br><a href="#">NCT05040724</a>                                                                                                            | June 2022                          |
| A Phase III Confirmatory Study of K-237-Multi-regional, Multi-center, Placebo Controlled, Randomized, Double Blind, Parallel Group Controlled Trial in Patients With Mild COVID-19<br><br><a href="#">NCT05056883</a>                                                                                                                    | September 30, 2022                 |
| A multicentre, phase III, double-blind, randomised, parallel, placebo-controlled trial to assess efficacy and safety of early administration of Ivermectin during 3 consecutive days to prevent SARS CoV-2 (COVID-19) hospitalisation in adults older than 50 years of age<br><br><a href="#">EudraCT 2020-005015-40</a>                 | NR                                 |
| A Phase 2 Double-blind Randomized Placebo-controlled Trial to Assess the Efficacy of Ivermectin in Combination With Favipiravir in Mild-to-moderate COVID-19 Adult Patients<br><br><a href="#">NCT05155527</a>                                                                                                                           | June 2022                          |
| In vivo use of ivermectin (IVR) for treatment for corona virus infected patients: a randomized controlled trial<br><br><a href="#">ChiCTR2000033627</a>                                                                                                                                                                                  | NR                                 |
| Pragmatic study "CORIVER": Ivermectin as antiviral treatment for patients infected by SARS-COV2 (COVID-19)<br><br><a href="#">EudraCT 2020-001971-33</a>                                                                                                                                                                                 | NR                                 |
| Multicenter, randomized, double-blind, placebo-controlled study investigating efficacy, safety and tolerability of ivermectin HUV-19 in patients with proven SARS-CoV-2 infection (COVID-19) and man.<br><br><a href="#">EudraCT 2020-002091-12</a>                                                                                      | NR                                 |
| <i>Nitazoxanide</i>                                                                                                                                                                                                                                                                                                                      |                                    |
| The C3 Nitazoxanide for Mild to Moderate COVID-19 in HIV-infected and HIV-uninfected Adults With Enhanced Risk: a Double-blind, Randomised, Placebo-controlled Trial in a Resource-poor Setting<br><br><a href="#">NCT04523090</a>                                                                                                       | February 2022                      |
| Phase 3, Randomized, Double-Blind, Placebo-Controlled Trial to Evaluate Efficacy and Safety of Nitazoxanide for Treatment of Mild or Moderate COVID-19 in Subjects at High Risk of Severe Illness<br><br><a href="#">NCT05157243</a>                                                                                                     | May 2022                           |
| Prospective, Randomized, Double-blind, Parallel, Placebo Controlled Study to Evaluate the Safety and Efficacy of Nitazoxanide 600 mg Three Times a Day to Treat Ambulatory Adult Subjects Diagnosed With COVID-19 With Mild Symptoms Assisted in the Public Health System of the City of Mesquita -RJ<br><br><a href="#">NCT04441398</a> | September 2020                     |
| Phase 3, Randomized, Double-Blind, Placebo-Controlled Trial to Evaluate Efficacy and Safety of Nitazoxanide in the Treatment of Mild COVID-19 in Subjects Not at High Risk of Severe Illness<br><br><a href="#">NCT05157269</a>                                                                                                          | April 2022                         |
| <i>Convalescent plasma</i>                                                                                                                                                                                                                                                                                                               |                                    |

| Title<br>Registration Number<br>Trial Name                                                                                                                                       | Study Completion Date <sup>a</sup> |
|----------------------------------------------------------------------------------------------------------------------------------------------------------------------------------|------------------------------------|
| Reconvalescent Plasma / Camostat Mesylate Early in Sars-CoV-2 Q-PCR (COVID-19) Positive High-risk Individuals<br><a href="#">NCT04681430</a>                                     | October 29, 2021                   |
| Phase I/II Clinical Trial for Dose Escalation and Safety Assessment and Clinical Response of Anti-SARS-CoV-2 Serum Produced by Instituto Butantan<br><a href="#">NCT04834089</a> | May 2022                           |
| <i>Other drugs</i>                                                                                                                                                               |                                    |
| <i>Corticosteroids</i>                                                                                                                                                           |                                    |
| ACTIV-6: COVID-19 Outpatient Randomized Trial to Evaluate Efficacy of Repurposed Medications<br><a href="#">NCT04885530</a>                                                      | March 2023                         |
| <i>Fluvoxamine</i>                                                                                                                                                               |                                    |
| Fluvoxamine for Early Treatment of Covid-19: a Fully-remote, Randomized Placebo Controlled Trial<br><a href="#">NCT04668950</a>                                                  | September 28, 2021                 |
| ACTIV-6: COVID-19 Outpatient Randomized Trial to Evaluate Efficacy of Repurposed Medications<br><a href="#">NCT04885530</a>                                                      | March 2023                         |

<sup>a</sup> As reported by the authors

*Abbreviations:* COVID 19= Coronavirus Infection; NCT=; NR= not reported; RT- PCR= Reverse transcription polymerase chain reaction; RCT= randomized controlled trial; SARS CoV2= severe acute respiratory syndrome coronavirus type 2.

## Supplement Table 5: Excluded Studies

### Ineligible Study Design (n=1)

1. Pere M-M, Arvind G, Andrea A, et al. Convalescent plasma for outpatients with early COVID-19. medRxiv. 2021.

### Ineligible Publication Type (n=112)

1. Abayomi A, Osibogun A, Ezechi O, Wright K, Ola B, Ojo O, et al. A multi-centre, randomized, double-blind, placebo-controlled clinical trial of the efficacy and safety of chloroquine phosphate, hydroxychloroquine sulphate and lopinavir/ritonavir for the treatment of COVID-19 in Lagos State: study protocol for a randomized controlled trial. *Trials*. 2021;22(1):869. doi: 10.1186/s13063-021-05675-x.
2. Asan Medical Center. Fluvoxamine for Adults With Mild to Moderate COVID-19: ClinicalTrials.gov; 2021 [03/30/2022]. Available from: <https://clinicaltrials.gov/ct2/show/NCT04711863>.
3. Ashraf S, Ashraf S, Farooq I, Ashraf S, Ashraf M, Imran MA, et al. Anti-COVID property of subcutaneous ivermectin in synergy with zinc among midlife moderately symptomatic patients: a structured summary of a study protocol for a randomised controlled trial. *Trials*. 2021;22(1):591. Epub 20210906. doi: 10.1186/s13063-021-05487-z. PubMed PMID: 34488858; PubMed Central PMCID: PMC8419386.
4. AstraZeneca. Phase III Study of AZD7442 for Treatment of COVID-19 in Outpatient Adults (TACKLE): ClinicalTrials.gov; 2021 [03/17/2022]. Available from: <https://clinicaltrials.gov/ct2/show/NCT04723394>.
5. Australia NT. A randomized double-blind placebo-controlled trial of oral ivermectin for outpatient treatment of those at high risk for hospitalization due to COVID-19: ANZCTR; 2020 [03/16/2022]. Available from: <https://anzctr.org.au/Trial/Registration/TrialReview.aspx?ACTRN=12620000982910>.
6. Ayudas Diagnosticas Sura S.A.S. Ivermectina Colombia (IVERCOL) (IVERCOL): ClinicalTrials.gov; 2021 [03/17/2022]. Available from: <https://clinicaltrials.gov/ct2/show/NCT04886362>.
7. Azidus Brasil. Efficacy and Safety of Nitazoxanide 600 mg to Treat Mild Ambulatory COVID-19 Patients: ClinicalTrials.gov; 2020 [03/16/2022]. Available from: <https://clinicaltrials.gov/ct2/show/NCT04441398>.
8. Barcelona Institute for Global Health. Hydroxychloroquine efficacy in preventing SARS-CoV-2 infection and CoVid-19 disease severity during pregnancy: EU Clinical Trials Register (EU CTR); 2020 [03/15/2022]. Available from: [https://www.clinicaltrialsregister.eu/ctr-search/search?query=eudract\\_number:2020-001587-29](https://www.clinicaltrialsregister.eu/ctr-search/search?query=eudract_number:2020-001587-29).
9. Biber A, Mandelboim M, Harmelin G, Lev D, Ram L, Shaham A, et al. Favorable outcome on viral load and culture viability using Ivermectin in early treatment of non-hospitalized patients with mild COVID-19 – A double-blind, randomized placebo-controlled trial 2021 [September, 5 2022]. 2021.05.31.21258081]. Available from: <http://medrxiv.org/content/early/2021/05/31/2021.05.31.21258081.abstract>.
10. Brown LK, Freemantle N, Breuer J, Dehbi HM, Chowdhury K, Jones G, et al. Early antiviral treatment in outpatients with COVID-19 (FLARE): a structured summary of a study protocol for a randomised controlled trial. *Trials*. 2021;22(1):193. Epub 20210308. doi: 10.1186/s13063-021-05139-2. PubMed PMID: 33685502; PubMed Central PMCID: PMC7938371.
11. Bulgarian Drug Agency. Multicenter, randomized, double-blind, placebo-controlled study investigating efficacy, safety and tolerability of ivermectin HUVE-19 in patients with proven SARS-CoV-2 infection (COVID-19) and manifested clinical symptoms: EU Clinical Trials Register

- (EU CTR); 2020 [03/15/2022]. Available from: <https://www.clinicaltrialsregister.eu/ctr-search/trial/2020-002091-12/BG>.
12. Butantan Institute. Clinical Trial for Assessment of Anti-SARS-CoV-2 Serum for Early Treatment of COVID-19 Cases: ClinicalTrials.gov; 2021 [03/16/2022]. Available from: <https://clinicaltrials.gov/ct2/show/NCT04834089>.
  13. Center for Primary Care and Public Health University of Lausanne Switzerland. #StayHome: Early Hydroxychloroquine to Reduce Secondary Hospitalisation and Household Transmission in COVID-19 (#StayHome): ClinicalTrials.gov; 2020 [03/16/2022]. Available from: <https://clinicaltrials.gov/ct2/show/NCT04385264>.
  14. Chaccour C, Ruiz-Castillo P, Richardson MA, Moncunill G, Casellas A, Carmona-Torre F, et al. The SARS-CoV-2 Ivermectin Navarra-ISGlobal Trial (SAINT) to Evaluate the Potential of Ivermectin to Reduce COVID-19 Transmission in low risk, non-severe COVID-19 patients in the first 48 hours after symptoms onset: A structured summary of a study protocol for a randomized control pilot trial. *Trials*. 2020;21(1):498. Epub 20200608. doi: 10.1186/s13063-020-04421-z. PubMed PMID: 32513289; PubMed Central PMCID: PMC7276958.
  15. Chemo Research S. L. A multicentre, phase III, double-blind, randomised, parallel, placebo-controlled trial to assess efficacy and safety of early administration of Ivermectin during 3 consecutive days to prevent SARS CoV-2 (COVID-19) hospitalisation in adults older than 50 years of age: EU Clinical Trials Register (EU CTR); 2021 [03/15/2022]. Available from: <https://www.clinicaltrialsregister.eu/ctr-search/trial/2020-005015-40/SK>.
  16. Clemency BM, Varughese R, Gonzalez-Rojas Y, Caryn GM, Wanda P, David JK, et al. A randomized controlled trial of inhaled ciclesonide for outpatient treatment of symptomatic COVID-19 infections 2021 [September 5, 2022]. Available from: <http://www.epistemikos.org/documents/0433c8a99511dab7bdc7a309c66a9e85d9938f2>  
<https://www.medrxiv.org/content/medrxiv/early/2021/09/12/2021.09.07.21261811.full.pdf>.
  17. Clinical Research Centre Malaysia. Ivermectin Treatment Efficacy in Covid-19 High Risk Patients: ClinicalTrials.gov; 2021 [03/16/2022]. Available from: <https://clinicaltrials.gov/ct2/show/NCT04920942>.
  18. Clinical Urology and Epidemiology Working Group. SOLIDARITY Finland Long COVID-19: ClinicalTrials.gov; 2021 [03/30/2022]. Available from: <https://clinicaltrials.gov/ct2/show/NCT04978259>.
  19. Coordinación de Investigación en Salud Mexico. Hidroxicloroquina With Azitromicina Versus Hidroxicloroquina and Placebo Int Patients With Mild COVID-19 (Omehecatl): ClinicalTrials.gov; 2021 [03/17/2022]. Available from: <https://clinicaltrials.gov/ct2/show/NCT04964583>.
  20. Corvus Pharmaceuticals Inc. CPI-006 Plus Standard of Care Versus Placebo Plus Standard of Care in Mild to Moderately Symptomatic Hospitalized Covid-19 Patients: ClinicalTrials.gov; 2021 [03/17/2022]. Available from: <https://clinicaltrials.gov/ct2/show/NCT04734873>.
  21. David ML, Li-An KB, Kashfia C, Stephanie D, Philip Y, Felicia I, et al. Favipiravir, lopinavir-ritonavir or combination therapy (FLARE): a randomised, double blind, 2x2 factorial placebo-controlled trial of early antiviral therapy in COVID-19 2022 [September, 5 2022]. Available from: <http://www.epistemikos.org/documents/039aa296d4c28329ba0584cfdb4ec58addeaf02>  
<https://www.medrxiv.org/content/medrxiv/early/2022/02/15/2022.02.11.22270775.full.pdf>.
  22. Dougan M, Azizad M, Chen P, Feldman B, Frieman M, Igbinador A, et al. Bebtelovimab, alone or together with bamlanivimab and etesevimab, as a broadly neutralizing monoclonal antibody treatment for mild to moderate, ambulatory COVID-19 2022 [September, 5 2022]. 2022.03.10.22272100]. Available from: <http://medrxiv.org/content/early/2022/03/12/2022.03.10.22272100.abstract>.
  23. Duvignaud A, Lhomme E, Pistone T, Onaisi R, Sitta R, Journot V, et al. Home Treatment of Older People with Symptomatic SARS-CoV-2 Infection (COVID-19): A structured Summary of a Study

- Protocol for a Multi-Arm Multi-Stage (MAMS) Randomized Trial to Evaluate the Efficacy and Tolerability of Several Experimental Treatments to Reduce the Risk of Hospitalisation or Death in outpatients aged 65 years or older (COVERAGE trial). *Trials*. 2020;21(1):846. doi: 10.1186/s13063-020-04619-1.
24. Erasmus Medical Center. Early Convalescent Plasma Therapy for High-risk Patients With COVID-19 in Primary Care (the CoV-Early Study): *clinicaltrials.gov*; 2020 [03/16/2022]. Available from: <https://clinicaltrials.gov/ct2/show/NCT04589949>.
  25. Farooq U. Effectiveness of Hydroxychloroquine in Covid-19 Patients (Covid): *ClinicalTrials.gov*; 2020 [03/16/2022]. Available from: <https://clinicaltrials.gov/ct2/show/NCT04328272>.
  26. Fawaz M, Raad H. In vivo use of ivermectin (IVR) for treatment for corona virus infected patients (COVID-19): a randomized controlled trial Chinese Clinical Trial Registry (ChiCTR); 2020 [02/10/2022]. Available from: <http://www.chictr.org.cn/showproj.aspx?proj=54707>.
  27. Fimea. Controlled clinical trial of hydroxychloroquine in the treatment of adult patients with Covid-19 infection in a primary care setting: EU Clinical Trials Register (EU CTR); 2020 [03/15/2022]. Available from: <https://www.clinicaltrialsregister.eu/ctr-search/trial/2020-002038-33/FI>.
  28. Fundació Assistencial Mútua Terrassa. Randomised clinical trial of ivermectin for treatment and prophylaxis of COVID-19: EU Clinical Trials Register (EU CTR); 2020 [03/15/2022]. Available from: [https://www.clinicaltrialsregister.eu/ctr-search/search?query=eudract\\_number:2020-001994-66](https://www.clinicaltrialsregister.eu/ctr-search/search?query=eudract_number:2020-001994-66).
  29. Garcia P, Hurtado H, Ugarte-Gil C, León P, Malaga G, Chaccour C, et al. Randomized Clinical Trial to Compare the Efficacy of Ivermectin Versus Placebo to Negativize Nasopharyngeal PCR in Patients with Early COVID-19 in Peru (SAINT-Peru): A Structured Summary of a Study Protocol for Randomized Controlled Trial. *ResearchSquare*. 2021. doi: 10.21203/rs.3.rs-345747/v1.
  30. Garcia PJ, Mundaca H, Ugarte-Gil C, Leon P, Malaga G, Chaccour C, et al. Randomized clinical trial to compare the efficacy of ivermectin versus placebo to negativize nasopharyngeal PCR in patients with early COVID-19 in Peru (SAINT-Peru): a structured summary of a study protocol for randomized controlled trial. *Trials*. 2021;22(1):262. Epub 2021/04/11. doi: 10.1186/s13063-021-05236-2. PubMed PMID: 33836826; PubMed Central PMCID: PMC8033091.
  31. Gilead Sciences. Study in Participants With Early Stage Coronavirus Disease 2019 (COVID-19) to Evaluate the Safety, Efficacy, and Pharmacokinetics of Remdesivir Administered by Inhalation: *ClinicalTrials.gov*; 2020 [03/17/2022]. Available from: <https://clinicaltrials.gov/ct2/show/NCT04539262>.
  32. González R, García-Otero L, Pons-Duran C, Marbán-Castro E, Goncé A, Llubra E, et al. Hydroxychloroquine efficacy and safety in preventing SARS-CoV-2 infection and COVID-19 disease severity during pregnancy (COVID-Preg): a structured summary of a study protocol for a randomised placebo controlled trial. *Trials*. 2020;21(1):607. Epub 20200702. doi: 10.1186/s13063-020-04557-y. PubMed PMID: 32616063; PubMed Central PMCID: PMC7330539.
  33. Göpel S, Bethge W, Martus P, Kreth F, Iftner T, Joos S, et al. Test and treat COVID 65 plus - Hydroxychloroquine versus placebo in early ambulatory diagnosis and treatment of older patients with COVID19: A structured summary of a study protocol for a randomised controlled trial. *Trials*. 2020;21(1):635. doi: 10.1186/S13063-020-04556-Z.
  34. Government of Punjab Specialized Healthcare and Medical Education Department. Post-Exposure Prophylaxis for Asymptomatic SARS-CoV-2 COVID-19 Patients With chloroquinE Compounds (PEACE): *ClinicalTrials.gov*; 2020 [03/16/2022]. Available from: <https://clinicaltrials.gov/ct2/show/NCT04346667>.
  35. Government of Punjab Specialized Healthcare and Medical Education Department. Prophylaxis of Exposed COVID-19 Individuals With Mild Symptoms Using chloroquinE Compounds



- (PRECISE): ClinicalTrials.gov; 2020 [03/16/2022]. Available from: <https://clinicaltrials.gov/ct2/show/NCT04351191>.
36. Griffiths GO, FitzGerald R, Jaki T, Corkhill A, Reynolds H, Ewings S, et al. AGILE: a seamless phase I/IIa platform for the rapid evaluation of candidates for COVID-19 treatment: an update to the structured summary of a study protocol for a randomised platform trial letter. *Trials*. 2021;22(1):487. Epub 2021/07/28. doi: 10.1186/s13063-021-05458-4. PubMed PMID: 34311777; PubMed Central PMCID: PMC8311065.
  37. Health Institutes of Turkey. Clinical Trial For Early SARS-CoV-2 (COVID-19) Treatment: ClinicalTrials.gov; 2021 [03/17/2022]. Available from: <https://clinicaltrials.gov/ct2/show/NCT04981379>.
  38. Heinrich-Heine University Duesseldorf. Reconvalescent Plasma/Camostat Mesylate Early in SARS-CoV-2 Q-PCR (COVID-19) Positive High-risk Individuals: ClinicalTrials.gov; 2021 [03/16/2022]. Available from: <https://clinicaltrials.gov/ct2/show/NCT04681430>.
  39. Hinks TSC, Barber VS, Black J, Dutton SJ, Jabeen M, Melhorn J, et al. A multi-centre open-label two-arm randomised superiority clinical trial of azithromycin versus usual care in ambulatory COVID-19: study protocol for the ATOMIC2 trial. *Trials*. 2020;21(1):718. doi: 10.1186/S13063-020-04593-8.
  40. Hospital Alemão Oswaldo Cruz. Randomized Placebo-controlled Trial of Hydroxychloroquine in Outpatient Cases With Coronavirus Disease 2019 (COVID-19): ClinicalTrials.gov; 2020 [03/16/2022]. Available from: <https://clinicaltrials.gov/ct2/show/NCT04466540>.
  41. Hospital Universitario Virgen de las Nieves. Pragmatic study "CORIVER": Ivermectin as antiviral treatment for patients infected by SARS-COV2 (COVID-19): EU Clinical Trials Register (EU CTR); 2020 [03/15/22]. Available from: <https://www.clinicaltrialsregister.eu/ctr-search/trial/2020-001971-33/ES>.
  42. International Centre for Diarrhoeal Disease Research Bangladesh. Efficacy and Safety of Ivermectin and Doxycycline in Combination or IVE Alone in Patients With COVID-19 Infection.: ClinicalTrials.gov; 2020 [03/15/2022]. Available from: <https://clinicaltrials.gov/ct2/show/NCT04407130>.
  43. Investigacion Biomedica para el Desarrollo de Farmacos S. A. de C. V. Efficacy, Safety and Tolerability of Ivermectin in Subjects Infected With SARS-CoV-2 With or Without Symptoms (SILVERBULLET): ClinicalTrials.gov; 2020 [03/16/2022]. Available from: <https://clinicaltrials.gov/ct2/show/NCT04407507>.
  44. IRCCS Sacro Cuore Don Calabria di Negrar. COVidIVERmectin: Ivermectin for Treatment of Covid-19 (COVER): ClinicalTrials.gov; 2020 [03/15/2022]. Available from: <https://clinicaltrials.gov/ct2/show/NCT04438850>.
  45. Istituto Nazionale per le Malattie Infettive. Adaptive Randomized trial for therapy of COReona virus disease 2019 at home with oral antivirals: EU Clinical Trials Register (EU CTR); 2020 [03/30/2022]. Available from: <https://www.clinicaltrialsregister.eu/ctr-search/search?query=2020-001528-32>.
  46. Italian Medicines Agency. Adaptive, randomized, placebo-controlled trial to evaluate the efficacy of monoclonal antibodies in outpatients with mild or moderate COVID-19 (MANTICO): EU Clinical Trials Register (EU CTR); 2021 [03/17/2022]. Available from: <https://www.clinicaltrialsregister.eu/ctr-search/trial/2021-002612-31/IT>.
  47. Jewish General Hospital. Effect of Hydroxychloroquine in COVID-19 Positive Pregnant Women (HyPreC): ClinicalTrials.gov; 2020 [03/16/2022]. Available from: <https://clinicaltrials.gov/ct2/show/NCT04354441>.
  48. Kawai N. A Study of PF-07321332/Ritonavir in Non-hospitalized Low-Risk Adult Participants With COVID-19: JPRN; 2021 [03/16/2022]. Available from: <https://jrct.niph.go.jp/en-latest-detail/JRCT2031210274>.

49. Keitel V, Jensen B, Feldt T, Fischer JC, Bode JG, Matuschek C, et al. Reconvalescent plasma/camostat mesylate in early SARS-CoV-2 Q-PCR positive high-risk individuals (RES-Q-HR): a structured summary of a study protocol for a randomized controlled trial. *Trials*. 2021;22(1):343. Epub 2021/05/19. doi: 10.1186/s13063-021-05181-0. PubMed PMID: 34001215; PubMed Central PMCID: PMC8127198.
50. Keyhani S. VA Remote and Equitable Access to COVID-19 Healthcare Delivery (VA-REACH TRIAL): *ClinicalTrials.gov*; 2020 [03/16/2022]. Available from: <https://clinicaltrials.gov/ct2/show/NCT04363203>.
51. Keyhani S, Kelly JD, Bent S, Boscardin WJ, Shlipak MG, Leonard S, et al. A telehealth-based randomized controlled trial: A model for outpatient trials of off-label medications during the COVID-19 pandemic. *Clin Trials*. 2021;18(4):514-7. Epub 20210520. doi: 10.1177/17407745211011577. PubMed PMID: 34011199; PubMed Central PMCID: PMC8292190.
52. Kitasato University. Study in COvid-19 Patients With ivermectin (CORVETTE-01): *ClinicalTrials.gov*; 2020 [03/16/2022]. Available from: <https://clinicaltrials.gov/ct2/show/NCT04703205>.
53. Kowa Company Ltd. A Phase III Confirmatory Study of K-237: *ClinicalTrials.gov*; 2021 [03/17/2022]. Available from: <https://clinicaltrials.gov/ct2/show/NCT05056883>.
54. London School of Hygiene and Tropical Medicine. Prevention and Treatment for COVID -19 (Severe Acute Respiratory Syndrome Coronavirus 2 SARS-CoV-2) Associated Severe Pneumonia in the Gambia: *ClinicalTrials.gov*; 2021 [03/15/2022]. Available from: <https://clinicaltrials.gov/ct2/show/NCT04703608>.
55. Lopez AA. Pilot trial on early treatment with hydroxychloroquine in patients with COVID-19 who do not have hospital admission at diagnosis. Ensayo piloto sobre tratamiento precoz con hidroxiclороquina en pacientes con COVID-19 que no requieren ingreso hospitalario al diagnóstico: EU Clinical Trials Register; 2020 [03/16/2022]. Available from: <https://www.clinicaltrialsregister.eu/ctr-search/trial/2020-002449-41/ES>.
56. Lothar SA, Abassi M, Agostinis A, Bangdiwala AS, Cheng MP, Drobot G, et al. Post-exposure prophylaxis or pre-emptive therapy for severe acute respiratory syndrome coronavirus 2 (SARS-CoV-2): study protocol for a pragmatic randomized-controlled trial. *Canadian journal of anaesthesia = Journal canadien d'anesthesie*. 2020;67(9):1201-11. doi: 10.1007/s12630-020-01684-7.
57. Luo Z, Xiao W. Clinical study for Lopinavir and Ritonavir in the treatment of novel coronavirus pneumonia (COVID-19) Chinese Clinical Trial Registry (ChiCTR); 2020 [03/30/2022]. Available from: <https://www.chictr.org.cn/hvshowproject.aspx?id=23465>.
58. Mahidol University. A Double-blind Randomized Controlled Trial of Ivermectin With Favipiravir in Mild-to-moderate COVID-19 Patients (IFCOV): *ClinicalTrials.gov*; 2021 [03/17/2022]. Available from: <https://clinicaltrials.gov/ct2/show/NCT05155527>.
59. Max Health Subsero Health. An Outpatient Clinical Trial Using Ivermectin and Doxycycline in COVID-19 Positive Patients at High Risk to Prevent COVID-19 Related Hospitalization: *ClinicalTrials.gov*; 2021 [03/17/2022]. Available from: <https://clinicaltrials.gov/ct2/show/NCT04729140>.
60. Mazandaran University of Medical Sciences. Double-blind placebo-controlled clinical trial of evaluating the effectiveness of Ivermectin in treatment of outpatients with COVID-19 in 2021: Iranian Registry of Clinical Trials; 2020 [03/16/2022]. Available from: <https://www.irct.ir/trial/53949>.
61. McGill University Health Centre/Research Institute of the McGill University Health Centre. Preemptive Therapy for SARS-Coronavirus-2 (COVID-19 PEP Canada): *ClinicalTrials.gov*; 2020 [03/15/2022]. Available from: <https://clinicaltrials.gov/ct2/show/NCT04421664>.

62. Medical University of Vienna. Austrian CoronaVirus Adaptive Clinical Trial (COVID-19) (ACOVACT): ClinicalTrials.gov; 2020 [03/30/2022]. Available from: <https://clinicaltrials.gov/ct2/show/NCT04351724>.
63. Merck Sharp & Dohme LLC. Efficacy and Safety of Molnupiravir (MK-4482) in Non-Hospitalized Adult Participants With COVID-19 (MK-4482-002): clinicaltrials.gov; 2020 [03/16/2022]. Available from: <https://clinicaltrials.gov/ct2/show/NCT04575597>.
64. Mohan A, Tiwari P, Suri T, Mittal S, Patel A, Jain A, et al. Ivermectin in mild and moderate COVID-19 (RIVET-COV): a randomized, placebo-controlled trial 2021 [September, 5 2022]. Available from: <http://www.epistemonikos.org/documents/3429e55a1b440d02fb1c12eb4b24e3b900ba8f65>  
<https://assets.researchsquare.com/files/rs-191648/v1/26b2c005-bbec-4018-8c4c-401db1213ffc.pdf?c=1631872584>.
65. Naggie S. ACTIV-6: COVID-19 Study of Repurposed Medications: ClinicalTrials.gov; 2021 [03/17/2022]. Available from: <https://clinicaltrials.gov/ct2/show/NCT04885530>.
66. National Institute of Allergy and Infectious Diseases (NIAID). ACTIV-2: A Study for Outpatients With COVID-19: ClinicalTrials.gov; 2020 [03/17/2022]. Available from: <https://clinicaltrials.gov/ct2/show/NCT04518410>.
67. National Institute of Allergy and Infectious Diseases (NIAID). Evaluating the Efficacy of Hydroxychloroquine and Azithromycin to Prevent Hospitalization or Death in Persons With COVID-19: ClinicalTrials.gov; 2020 [03/16/2022]. Available from: <https://clinicaltrials.gov/ct2/show/NCT04358068>.
68. National Institute of Pharmacy Hungary. A randomized, double-blind, placebo-controlled study to assess the safety and efficacy of ivermectin in asymptomatic and mild severity COVID-19 patients: EU Clinical Trials Register (EU CTR); 2021 [03/15/2022]. Available from: <https://www.clinicaltrialsregister.eu/ctr-search/trial/2021-000166-15/HU>.
69. NGM Biopharmaceuticals Inc. A Phase 1/2 Study to Assess the Safety, Tolerability and Pharmacokinetics of NGM621 in Healthy Subjects, and to Assess the Safety, PK and Efficacy in Subjects With Moderate to Severe ARDS Caused by COVID-19: ClinicalTrials.gov; 2020 [03/17/2022]. Available from: <https://clinicaltrials.gov/ct2/show/NCT04582318>.
70. OHSU Knight Cancer Institute. Lopinavir/Ritonavir for the Treatment of COVID-19 Positive Patients With Cancer and Immune Suppression in the Last Year: ClinicalTrials.gov; 2020 [03/16/2022]. Available from: <https://clinicaltrials.gov/ct2/show/NCT04455958>.
71. Oliveira Junior HA, Ferri CP, Boszczowski I, Oliveira GBF, Cavalcanti AB, Rosa RG, et al. Rationale and Design of the COVID-19 Outpatient Prevention Evaluation (COPE - Coalition V) Randomized Clinical Trial: Hydroxychloroquine vs. Placebo in Non-Hospitalized Patients. *Arq Bras Cardiol.* 2022;118(2):378-87. doi: 10.36660/abc.20210832. PubMed PMID: 35262569; PubMed Central PMCID: PMC8856682.
72. Oregon Health and Science University. Assessing Hydroxychloroquine in Patients With SARS-CoV-2 (COVID-19): ClinicalTrials.gov; 2020 [03/16/2022]. Available from: <https://clinicaltrials.gov/ct2/show/NCT04363866>.
73. Raincy Montfermeil Hospital Group. Evaluation of the Impact of the Administration of Single Dose of Ivermectin in the Early Phase of COVID-19 (IVERCoV): ClinicalTrials.gov; 2021 [03/17/2022]. Available from: <https://clinicaltrials.gov/ct2/show/NCT05040724>.
74. Rambam Health Care Campus. Hydroxychloroquine for the Treatment of Patients With Mild to Moderate COVID-19 to Prevent Progression to Severe Infection or Death: ClinicalTrials.gov; 2020 [03/16/2022]. Available from: <https://clinicaltrials.gov/ct2/show/NCT04323631>.
75. Ravi A, Lydia G, Mary C, Matthew Craig H, Ian F, Sunita N, et al. Hydroxychloroquine for SARS-CoV-2 positive patients quarantined at home: The first interim analysis of a remotely conducted randomized clinical trial. *medRxiv.* 2021. doi: 10.1101/2021.02.22.21252228.

76. Regeneron Pharmaceuticals. A Study to Assess the Virologic Efficacy of REGN10933+REGN10987 Across Different Dose Regimens in Adult Outpatients With SARS-CoV-2 Infection: ClinicalTrials.gov; 2020 [03/16/2022]. Available from: <https://clinicaltrials.gov/ct2/show/NCT04666441>.
77. Romark Laboratories L. C. Trial to Evaluate Nitazoxanide for Treatment of Mild or Moderate COVID-19 in Subjects at High Risk of Severe Illness: ClinicalTrials.gov; 2022 [03/16/2022]. Available from: <https://clinicaltrials.gov/ct2/show/NCT05157243>.
78. Romark Laboratories L. C. Trial to Evaluate Nitazoxanide for Treatment of Mild COVID-19 in Subjects Not at High Risk of Severe Illness: ClinicalTrials.gov; 2022 [03/16/2022]. Available from: <https://clinicaltrials.gov/ct2/show/NCT05157269>.
79. Rutgers The State University of New Jersey. Asymptomatic COVID-19 Trial (ACT): ClinicalTrials.gov; 2020 [03/16/2022]. Available from: <https://clinicaltrials.gov/ct2/show/NCT04374552>.
80. Sanofi. Hydroxychloroquine in Outpatient Adults With COVID-19: ClinicalTrials.gov; 2020 [03/16/2022]. Available from: <https://clinicaltrials.gov/ct2/show/NCT04333654>.
81. Self WH, Stewart TG, Wheeler AP, El Atrouni W, Bistran-Hall AJ, Casey JD, et al. Passive Immunity Trial for Our Nation (PassITON): study protocol for a randomized placebo-control clinical trial evaluating COVID-19 convalescent plasma in hospitalized adults. *Trials*. 2021;22(1):221. Epub 2021/03/22. doi: 10.1186/s13063-021-05171-2. PubMed PMID: 33743799; PubMed Central PMCID: PMC7980732.
82. Sheba Medical Center. Ivermectin vs. Placebo for the Treatment of Patients With Mild to Moderate COVID-19: ClinicalTrials.gov; 2020 [03/16/2022]. Available from: <https://clinicaltrials.gov/ct2/show/NCT04429711>.
83. Shiraz University of Medical Sciences. Investigation of the Effectiveness of Ivermectin on Outpatient Treatment of Covid-19 Patients, Shiraz City, Southern Iran, 2020: A Randomized Controlled Trial Study (RCT): Iranian Registry of Clinical Trials; 2020 [03/16/2022]. Available from: <https://www.irct.ir/trial/54710>.
84. Silva M, Espejo A, L Pereyra M, Lynch M, Thompson M, Taconelli H, et al. Efficacy of Nitazoxanide in reducing the viral load in COVID-19 patients. Randomized, placebo-controlled, single-blinded, parallel group, pilot study 2021 [September, 5 2022]. 2021.03.03.21252509. Available from: <http://medrxiv.org/content/early/2021/03/05/2021.03.03.21252509.abstract>.
85. Sorrento Therapeutics Inc. Study to Evaluate a Single Dose of STI-2020 (COVI-AMG™) in Adults With Mild COVID-19 Symptoms: ClinicalTrials.gov; 2021 [03/17/2022]. Available from: <https://clinicaltrials.gov/ct2/show/NCT04734860>.
86. Sorrento Therapeutics Inc. Study to Evaluate the Safety and Efficacy of a Single Dose of STI-2020 (COVI-AMG™) to Treat COVID-19: ClinicalTrials.gov; 2021 [03/17/2022]. Available from: <https://clinicaltrials.gov/ct2/show/NCT04738175>.
87. Sorrento Therapeutics Inc. Randomized Study to Evaluate Intranasal Dose of STI-2099 (COVI-DROPS™) in Outpatient Adults With Mild COVID-19 Infection (US): ClinicalTrials.gov; 2021 [03/17/2022]. Available from: <https://clinicaltrials.gov/ct2/show/NCT05074394>.
88. Sylvain AL, Mahsa A, Alyssa A, Ananta SB, Matthew PC, Glen D, et al. Post-exposure Prophylaxis or Preemptive Therapy for SARS-Coronavirus-2: Study Protocol for a Pragmatic Randomized Controlled Trial. *medRxiv*. 2020. doi: 10.1101/2020.05.01.20087999.
89. Temple University. Outpatient Use of Ivermectin in COVID-19: ClinicalTrials.gov; 2020 [03/16/2022]. Available from: <https://clinicaltrials.gov/ct2/show/NCT04530474>.
90. Terada-Hirashima J, Suzuki M, Uemura Y, Hojo M, Mikami A, Sugiura W, et al. The RACCO Trial to Assess the Efficacy and Safety of Inhaled Ciclesonide for Asymptomatic and Mild Patients with Covid-19: A Study Protocol for a Multi-center, Open- labeled, Randomized Controlled Trial. *JMIR research protocols*. 2020;9(12):e23830. doi: 10.2196/23830.

91. The University of The West Indies. World Health Organization (WHO) COVID-19 Solidarity Trial for COVID-19 Treatments (SOLIDARITY): ClinicalTrials.gov; 2020 [03/30/2022]. Available from: <https://clinicaltrials.gov/ct2/show/NCT04647669>.
92. TrueBinding Inc. Study of TB006 in Outpatient Patients With Mild to Moderate COVID-19: ClinicalTrials.gov; 2021 [03/17/22]. Available from: <https://clinicaltrials.gov/ct2/show/NCT04801056>.
93. UMC Utrecht. Randomized, Embedded, Multifactorial Adaptive Platform Trial for Community-Acquired Pneumonia (REMAP-CAP): ClinicalTrials.gov; 2016 [03/30/2022]. Available from: <https://clinicaltrials.gov/ct2/show/NCT02735707>.
94. UnitedHealth Group. PATCH 2&3:Prevention & Treatment of COVID-19 (Severe Acute Respiratory Syndrome Coronavirus 2) With Hydroxychloroquine: ClinicalTrials.gov; 2020 [03/16/2022]. Available from: <https://clinicaltrials.gov/ct2/show/NCT04353037>.
95. Universidad Mayor de San Simón. Clinical Trial to "Study the Efficacy and Therapeutic Safety of Ivermectin: (SAINTBO) (SAINTBO): ClinicalTrials.gov; 2021 [03/17/2022]. Available from: <https://clinicaltrials.gov/ct2/show/NCT04836299>.
96. Universidad Nacional de Asunción. Efficacy of Ivermectin in Outpatients With Non-severe COVID-19: ClinicalTrials.gov; 2021 [03/17/2022]. Available from: <https://clinicaltrials.gov/ct2/show/NCT04834115>.
97. Universidad Peruana Cayetano Heredia. Randomized phase IIA clinical trial to compare the efficacy of Ivermectin versus Placebo to obtain negative PCR results in patients with early phase COVID-19: Clinical Trials Peruvian Registry (CTPR); 2020 [03/17/2022]. Available from: <https://www.ins.gob.pe/ensayosclinicos/rpec/recuperarECPBNuevoEN.asp?numec=034-20>.
98. Universidad Peruana Cayetano Heredia. Randomized Phase IIA Clinical Trial to Evaluate the Efficacy of Ivermectin to Obtain Negative PCR Results in Patients With Early Phase COVID-19: ClinicalTrials.gov; 2020 [03/16/2022]. Available from: <https://clinicaltrials.gov/ct2/show/NCT04635943>.
99. University Hospital Strasbourg. Efficacy of Hydroxychloroquine, Telmisartan and Azithromycin on the Survival of Hospitalized Elderly Patients With COVID-19 (COVID-Aging): ClinicalTrials.gov; 2020 [03/30/2022]. Available from: <https://clinicaltrials.gov/ct2/show/NCT04359953>.
100. University Hospital Tuebingen. Hydroxychloroquine for the Treatment of Mild COVID-19 Disease (COMIHY): ClinicalTrials.gov; 2020 [03/16/2022]. Available from: <https://clinicaltrials.gov/ct2/show/NCT04340544>.
101. University Hospital Tuebingen. Randomized controlled trial of hydroxychloroquine versus placebo in early ambulatory diagnosis and treatment of elderly COVID-19 Patients: EU Clinical Trials Register; 2020 [03/16/2022]. Available from: <https://www.clinicaltrialsregister.eu/ctr-search/trial/2020-001482-37/DE>.
102. University of Alberta. Corticosteroids for COVID-19: clinicaltrials.gov; 2021 [03/16/2022]. Available from: <https://clinicaltrials.gov/ct2/show/NCT04795583>.
103. University of Cape Town. Catalysing the Containment of COVID-19: ClinicalTrials.gov; 2020 [03/16/2022]. Available from: <https://clinicaltrials.gov/ct2/show/NCT04523090>.
104. University of Oxford. Finding Treatments for COVID-19: A Trial of Antiviral Pharmacodynamics in Early Symptomatic COVID-19 (PLATCOV) (PLATCOV): ClinicalTrials.gov; 2021 [03/30/2022]. Available from: <https://clinicaltrials.gov/ct2/show/NCT05041907>.
105. University of South Alabama. Trial of Hydroxychloroquine In Covid-19 Kinetics (THICK): ClinicalTrials.gov; 2020 [03/16/2022]. Available from: <https://clinicaltrials.gov/ct2/show/NCT04353271>.
106. University of Utah. University of Utah COVID-19 Hydrochloroquine Trial. clinicaltrials.gov. 2020.
107. Vainio PJ, Hietasalo P, Koivisto AL, Kääriäinen S, Turunen J, Virtala M, et al. Hydroxychloroquine in the treatment of adult patients with Covid-19 infection in a primary care setting (LIBERTY): A

- structured summary of a study protocol for a randomised controlled trial. *Trials*. 2021;22(1):44. doi: 10.1186/s13063-020-04989-6.
108. Vanderbilt University Medical Center. Trial of Early Therapies During Non-hospitalized Outpatient Window for COVID-19 (TREATNOW): ClinicalTrials.gov; 2020 [03/16/2022]. Available from: <https://clinicaltrials.gov/ct2/show/NCT04372628>.
  109. Wag Y, Zhao J. A randomized, open-label study to evaluate the efficacy and safety of Lopinavir-Ritonavir in patients with mild novel coronavirus pneumonia (COVID-19): Chinese Clinical Trial Registry (ChiCTR); 2020 [03/30/2022]. Available from: <http://www.chictr.org.cn/showprojen.aspx?proj=48991>.
  110. Washington University School of Medicine. Fluvoxamine for Early Treatment of Covid-19: a Fully-remote, Randomized Placebo Controlled Trial (Stop Covid 2): ClinicalTrials.gov; 2020 [03/16/2022]. Available from: <https://clinicaltrials.gov/ct2/show/NCT04668950>.
  111. Wijewickrama A. A randomized control trial to assess the efficacy and safety of ivermectin in the treatment of mild to moderate COVID 19 patients: SLCTR; 2021 [03/16/2022]. Available from: <https://slctr.lk/trials/slctr-2021-020>.
  112. Zhao J, Wag Y. A randomized, open-label study to evaluate the efficacy and safety of Lopinavir-Ritonavir in patients with mild novel coronavirus pneumonia (COVID-19): Chinese Clinical Trial Registry; 2020 [03/16/2022]. Available from: <http://www.chictr.org.cn/showprojen.aspx?proj=48991>.

### Ineligible Population (n=34)

1. 1. Anan M, Kitisak P, Sujaree P, Swangjit S, Jakravoot M, Wiroj R, et al. Efficacy and safety of ivermectin in the treatment of mild-to-moderate COVID-19 infection: A randomized, double blind, placebo, controlled trial. *Research Square*. 2022. doi: 10.21203/rs.3.rs-1290999/v1.
2. AstraZeneca. Phase III Double-blind, Placebo-controlled Study of AZD7442 for Post- Exposure Prophylaxis of COVID-19 in Adults: clinicaltrials.gov; 2020 [03/16/2022]. Available from: <https://clinicaltrials.gov/ct2/show/NCT04625972>.
3. AstraZeneca. Phase I Double-blind, Placebo-controlled Study of AZD7442: clinicaltrials.gov; 2021 [03/16/2022]. Available from: <https://clinicaltrials.gov/ct2/show/NCT04896541>.
4. Azidus Brasil. Efficacy and Safety of Nitazoxanide 600 mg BID Versus Placebo for the Treatment of Hospitalized Patients With COVID-19: ClinicalTrials.gov; 2020 [03/17/2022]. Available from: <https://clinicaltrials.gov/ct2/show/NCT04423861>.
5. Barnabas RV, Brown E, Bershteyn A, Miller RS, Wener M, Celum C, et al. Efficacy of hydroxychloroquine for post-exposure prophylaxis to prevent severe acute respiratory syndrome coronavirus 2 (SARS-CoV-2) infection among adults exposed to coronavirus disease (COVID-19): a structured summary of a study protocol for a randomised controlled trial. *Trials*. 2020;21(1):475. doi: 10.1186/s13063-020-04446-4.
6. Bihariesingh-Sanchit R. Effect of convalescent plasma in early course of COVID-19 disease: ISRCTN registry; 2021 [03/17/2022]. Available from: <https://www.isrctn.com/ISRCTN49832318>.
7. Capital Medical University. A Trial of Remdesivir in Adults With Mild and Moderate COVID-19: ClinicalTrials.gov; 2020 [03/16/2022]. Available from: <https://clinicaltrials.gov/ct2/show/NCT04252664>.
8. Derya University. Post COVID-19 Anosmia treatments: UMIN Clinical Trials Registry; 2021 [03/16/2022]. Available from: [https://center6.umin.ac.jp/cgi-open-bin/ctr\\_e/ctr\\_view.cgi?recptno=R000049715](https://center6.umin.ac.jp/cgi-open-bin/ctr_e/ctr_view.cgi?recptno=R000049715).
9. Dubée V, Roy PM, Vielle B, Parot-Schinkel E, Blanchet O, Darsonval A, et al. Hydroxychloroquine in mild-to-moderate coronavirus disease 2019: a placebo-controlled double blind trial. *Clinical*

- microbiology and infection : the official publication of the European Society of Clinical Microbiology and Infectious Diseases. 2021;27(8):1124-30. doi: 10.1016/j.cmi.2021.03.005.
10. Eli L. A Study of LY3819253 (LY-CoV555) in Participants Hospitalized for COVID-19: ClinicalTrials.gov; 2020 [03/16/2022]. Available from: <https://clinicaltrials.gov/ct2/show/NCT04411628>.
  11. EU Clinical Trials Register (EU CTR). A SINGLE-BLINDED RANDOMIZED, PLACEBO-CONTROLLED PHASE II TRIAL OF PROPHYLACTIC TREATMENT WITH ORAL AZITHROMYCIN VERSUS PLACEBO IN CANCER PATIENTS UNDERGOING ANTINEOPLASTIC TREATMENT DURING THE COVID-19 PANDEMIC 2020 [03/30/2022]. Available from: <https://www.clinicaltrialsregister.eu/ctr-search/trial/2020-001327-13/AT>.
  12. Federal Research Clinical Center of Federal Medical and Biological Agency Russia. Hyperimmune Convalescent Plasma in Moderate and Severe COVID-19 Disease: ClinicalTrials.gov; 2020 [03/16/2022]. Available from: <https://clinicaltrials.gov/ct2/show/NCT04392414>.
  13. Fundação de Medicina Tropical Dr. Heitor Vieira Dourado. Chloroquine Diphosphate in the Prevention of SARS in Covid-19 Infection (CloroCOVID19II): ClinicalTrials.gov; 2020 [03/16/2022]. Available from: <https://clinicaltrials.gov/ct2/show/NCT04342650>.
  14. Health Institutes of Turkey. Clinical Trial For Early SARS-CoV-2 (COVID-19) Treatment: ClinicalTrials.gov; 2020 [03/16/2022]. Available from: <https://clinicaltrials.gov/ct2/show/NCT04981379>.
  15. Imunek's Farma ilac San. Tic. A. S. A Study To Evaluate The Efficacy And Safety Of a Novel Niclosamide Suspension Formulation For COVID-19 (NICLONEX): ClinicalTrials.gov; 2020 [03/17/2022]. Available from: <https://clinicaltrials.gov/ct2/show/NCT04558021>.
  16. Kriti R. Ivermectin as a potential treatment for COVID 19: A double blind randomized placebo-controlled trial: Clinical Trials Registry - India (CTRI); 2020 [03/15/2022]. Available from: <http://www.ctri.nic.in/Clinicaltrials/pmaindet2.php?trialid=46660>.
  17. Li Y, Xie Z, Lin W, Cai W, Wen C, Guan Y, et al. Efficacy and Safety of Lopinavir/Ritonavir or Arbidol in Adult Patients with Mild/Moderate COVID-19: An Exploratory Randomized Controlled Trial. *Med (N Y)*. 2020;1(1):105-13.e4. Epub 2020/05/19. doi: 10.1016/j.medj.2020.04.001. PubMed PMID: 32838353.
  18. Lofgren SM, Nicol MR, Bangdiwala AS, Pastick KA, Okafor EC, Skipper CP, et al. Safety of Hydroxychloroquine Among Outpatient Clinical Trial Participants for COVID-19. *Open forum infectious diseases*. 2020;7(11):ofaa500. doi: 10.1093/OFID/OFAA500.
  19. NYU Langone Health. Treating COVID-19 With Hydroxychloroquine (TEACH): ClinicalTrials.gov; 2020 [03/16/2022]. Available from: <https://clinicaltrials.gov/ct2/show/NCT04369742>.
  20. Pfizer Inc. A phase 2/3, randomized, double-blind, double-dummy, placebo controlled study to evaluate the safety and efficacy of 2 regimens of orally administered PF-07321332/Ritonavir in preventing symptomatic SARS-COV-2 infection in adult household contacts of individuals with SARS-COV-2 infection: EU Clinical Trials Register; 2021 [03/16/2022]. Available from: <https://www.clinicaltrialsregister.eu/ctr-search/trial/2021-002894-24/ES>.
  21. Preusser M. A single-blinded randomized, placebo-controlled phase II trial of prophylactic treatment with oral azithromycin versus placebo in cancer patients undergoing antineoplastic treatment during the COVID-19 pandemic EU Clinical Trials Register (EU CTR); 2020 [03/10/2022]. Available from: <https://www.clinicaltrialsregister.eu/ctr-search/trial/2020-001327-13/AT>.
  22. Ravi Shankar PS, Sima ST, Frances H, Phylinda LC, Rohit R, Richard A, et al. Innovative Randomized Phase 1 Study and Dosing Regimen Selection to Accelerate and Inform Pivotal COVID-19 Trial of Nirmatrelvir. *medRxiv*. 2022. doi: 10.1101/2022.02.08.22270649.
  23. Romark Laboratories L.C. Trial to Evaluate the Efficacy and Safety of Nitazoxanide (NTZ) for Post-Exposure Prophylaxis of COVID-19 and Other Viral Respiratory Illnesses in Elderly Residents of

- Long-Term Care Facilities (LTCF): ClinicalTrials.gov; 2020 [03/16/2022]. Available from: <https://clinicaltrials.gov/ct2/show/NCT04343248>.
24. Shahid Beheshti University of Medical Sciences. Evolution of the efficacy and safety of Dexamethasone administration in patients with mild to moderate COVID-19 acute respiratory disease syndrome: Iranian Registry of Clinical Trials; 2020 [03/16/2022]. Available from: <http://www.epistemontos.org/documents/37f1c55e3dff2bcf7ec2513441fcd74df45b4c5>.
  25. SigmaDrugs Research Ltd. A randomized, double-blind, placebo-controlled, adaptive-design study to assess the safety and efficacy of daily 200 mg fluvoxamine as add-on therapy to standard of care in moderate severity COVID-19 patients: EU Clinical Trials Register (EU CTR); 2020 [03/30/2022]. Available from: <https://www.clinicaltrialsregister.eu/ctr-search/trial/2020-002299-11/HU>.
  26. SigmaDrugs Research Ltd. Fluvoxamine Administration in Moderate SARS-CoV-2 (COVID-19) Infected Patients: ClinicalTrials.gov; 2021 [03/30/2022]. Available from: <https://clinicaltrials.gov/ct2/show/NCT04718480>.
  27. Skipper CP, Pastick KA, Engen NW, Bangdiwala AS, Abassi M, Lofgren SM, et al. Hydroxychloroquine in Nonhospitalized Adults With Early COVID-19: A Randomized Trial. *Annals of internal medicine*. 2020;173(8):623-31. doi: 10.7326/M20-4207.
  28. South African National Blood Service. Therapeutic Use of Convalescent Plasma in the Treatment of Patients With Moderate to Severe COVID-19: ClinicalTrials.gov; 2020 [03/16/2022]. Available from: <https://clinicaltrials.gov/ct2/show/NCT04516811>.
  29. Spinner CD, Gottlieb RL, Criner GJ, Arribas López JR, Cattelan AM, Soriano Viladomiu A, et al. Effect of Remdesivir vs Standard Care on Clinical Status at 11 Days in Patients With Moderate COVID-19: A Randomized Clinical Trial. *JAMA*. 2020;324(11):1048-57. doi: 10.1001/jama.2020.16349.
  30. University Hospital Tuebingen. Hydroxychloroquine for COVID-19: ClinicalTrials.gov; 2020 [03/16/2022]. Available from: <https://clinicaltrials.gov/ct2/show/NCT04342221>.
  31. University of Malaga. Prevention of COVID19 Infection in Nursing Homes by Chemoprophylaxis With Hydroxychloroquine (PREVICHARM): ClinicalTrials.gov; 2020 [03/16/2022]. Available from: <https://clinicaltrials.gov/ct2/show/NCT04400019>.
  32. Varnaseri M. Evaluating the efficacy and safety of Ivermectin in the treatment of COVID-19 patients: A double-blind randomized controlled trial, phase II Iranian Registry of Clinical Trials (IRCT); 2020 [03/15/2022]. Available from: <https://en.irct.ir/trial/49935>.
  33. WellStar Health System. Hydroxychloroquine Use in Hospitalized Patients With COVID-19: Impact on Progression to Severe or Critical Disease: ClinicalTrials.gov; 2020 [03/16/2022]. Available from: <https://clinicaltrials.gov/ct2/show/NCT04429867>.
  34. Wijewickrama A. Efficacy and safety of oral ivermectin in the treatment of COVID-19 patients: A randomized double-blind controlled clinical trial: Sri Lanka Clinical Trials Registry (SLCTR); 2021 [03/17/2022]. Available from: <https://slctr.lk/trials/slctr-2021-020>.

### Ineligible Intervention (n=13)

1. Adagio Therapeutics Inc. Evaluation of ADG20 for the Treatment of Mild or Moderate COVID-19 (STAMP). 2021. Accessed at ClinicalTrials.gov at <https://clinicaltrials.gov/ct2/show/NCT04805671> on 03/17/2022.
2. Assiut University. Ivermectin Versus Standard Treatment in Mild COVID-19. 2021. Accessed at ClinicalTrials.gov at <https://clinicaltrials.gov/ct2/show/NCT04937569> on 03/16/2022.
3. Azienda Ospedaliera Universitaria Integrata Verona. Adaptive, randomized, placebo-controlled trial to evaluate the efficacy of monoclonal antibodies in outpatients with mild or moderate COVID-19 (MANTICO) Studio clinico adattativo, randoMizzato, controllato con placebo, sull'uso



- di ANTicorpi monoclonali nei pazienti affetti da forma lieve-moderata di Covid-19 (MANTICO). 2021. Accessed at EU Clinical Trials Register at <https://www.clinicaltrialsregister.eu/ctr-search/trial/2021-002612-31/IT> on 03/16/2022.
4. Celltrion. To Evaluate the Safety and Efficacy of Inhaled CT-P63 and CT-P66 Combination Therapy in Patients With Mild to Moderate COVID-19. 2022. Accessed at ClinicalTrials.gov at <https://clinicaltrials.gov/ct2/show/NCT05224856> on 03/17/2022.
  5. Centre Hospitalier Universitaire de Bordeaux. Home treatment of elderly patients with symptomatic SARS-CoV-2 infection (COVID-19): a multiarm, multi-stage (MAMS) randomized trial to assess the efficacy and safety of several experimental treatments to reduce the risk of hospitalization or death. 2020. Accessed at EU Clinical Trials Register (EU CTR) at [https://www.clinicaltrialsregister.eu/ctr-search/search?query=eudract\\_number:2020-001435-27](https://www.clinicaltrialsregister.eu/ctr-search/search?query=eudract_number:2020-001435-27) on 03/15/22.
  6. Jones MH. Vaccine Plasma for the Treatment of COVID-19 Infection. 2022. Accessed at Brazilian Registry of Clinical Trials (ReBEC) at <https://ensaiosclinicos.gov.br/rg/RBR-2ggx7sm> on 03/17/2022.
  7. Moreira TG, Matos KTF, De Paula GS, et al. Nasal Administration of Anti-CD3 Monoclonal Antibody (Foralumab) Reduces Lung Inflammation and Blood Inflammatory Biomarkers in Mild to Moderate COVID-19 Patients: A Pilot Study. *Frontiers in immunology*. 2021;12:709861.
  8. Shanghai Junshi Bioscience Co Ltd. JS016 (Anti-SARS-CoV-2 Monoclonal Antibody) With Mild and Moderate COVID-19 or SARS-CoV-2 Asymptomatic Infection Subects. 2021. Accessed at ClinicalTrials.gov at <https://clinicaltrials.gov/ct2/show/NCT04780321> on 03/17/2022.
  9. Sinocelltech Ltd. To Evaluate SCTA01 Treatment of High-risk Outpatients With COVID-19 (MAOP3). 2021. Accessed at ClinicalTrials.gov at <https://clinicaltrials.gov/ct2/show/NCT04709328> on 03/17/2022.
  10. Sorrento Therapeutics Inc. Study to Evaluate a Single Intranasal Dose of STI-2099 (COVI-DROPS™) in Outpatient Adults With COVID-19 (UK). 2021. Accessed at ClinicalTrials.gov at <https://clinicaltrials.gov/ct2/show/NCT04900428> on 03/17/2022.
  11. St. Francis Hospital New York. Hydroxychloroquine, Azithromycin and Zinc for the Treatment of COVID-19 in the Outpatient Setting. 2020. Accessed at ClinicalTrials.gov at <https://clinicaltrials.gov/ct2/show/NCT04621461> on 03/16/2022.
  12. United Medical Specialties. Study to Evaluate the Efficacy of COVID19-0001-USR in Patients With Mild/or Moderate COVID-19 Infection in Outpatient (COVID-19). 2020. Accessed at ClinicalTrials.gov at <https://clinicaltrials.gov/ct2/show/NCT04595136> on 03/17/2022.
  13. Wang S, Tong Z. A Randomized Controlled Trial for Favipiravir Tablets Combine With Chloroquine Phosphate in the Treatment of Novel Coronavirus Pneumonia (COVID-19) 2020. Accessed at Chinese Clinical Trial Registry (ChiCTR) at <http://www.chictr.org.cn/showproj.aspx?proj=51329> on 03/10/2022.

### Ineligible Comparison (n=30)

1. Aijaz Zeeshan Khan C, Khurshid Ahmad K, Mohsin A, et al. Effectiveness of Ivermectin in SARS-CoV-2/COVID-19 Patients. *International journal of sciences*. 2020;9(9):31-5.
2. Alaa Rashad M, Nafady A, Hassan M, et al. Therapeutic efficacy of macrolides in management of patients with mild COVID-19. *Scientific Reports*. 2021.
3. ASUR Marche. Hydroxychloroquine sulfate early administration in symptomatic out of hospital COVID-19 positive patients. Hydro-Stop-COVID19 Trial Utilizzo precoce a domicilio di Idrossiclorochina solfato in pazienti affetti da COVID 19. Hydro-STOP-COVID19 Trial. 2020. Accessed at EU Clinical Trials Register at <https://www.clinicaltrialsregister.eu/ctr-search/trial/2020-001558-23/IT> on 03/16/2022.

4. AXIS Clinicals Ltd. Study to evaluate the efficacy and safety of Molnupiravir capsules Compare with the with Standard of Care Medications Care alone in patients who are suffering with Moderate COVID-19 disease. 2021. Accessed at CTRI at <http://www.ctri.nic.in/Clinicaltrials/pmaindet2.php?trialid=58743> on 03/16/2022.
5. B. D. R. Pharmaceuticals Internationals Pvt Ltd. A Phase II/III Clinical Trial to understand the efficacy and safety of Molnupiravir 800mg in the treatment of patients diagnosed with moderate COVID-19. 2021. Accessed at CTRI at <http://www.ctri.nic.in/Clinicaltrials/pmaindet2.php?trialid=56466> on 03/16/2022.
6. B. D. R. Pharmaceuticals Internationals Pvt Ltd. A Phase III Clinical Trial to understand the efficacy and safety of Molnupiravir 800mg in the treatment of patients diagnosed with mild COVID-19. 2021. Accessed at CTRI at <http://www.ctri.nic.in/Clinicaltrials/pmaindet2.php?trialid=56281> on 03/16/2022.
7. Babalola OE, Bode CO, Ajayi AA, et al. Ivermectin shows clinical benefits in mild to moderate COVID19: A randomised controlled double blind dose response study in Lagos. medRxiv. 2021:2021.01.05.21249131.
8. Centre Hospitalier Universitaire Amiens. Proactive Care of Ambulatory COVID19 Patients (AMBU-COVID). 2020. Accessed at ClinicalTrials.gov at <https://clinicaltrials.gov/ct2/show/NCT04371107> on 03/30/2022.
9. Chahla R, Ruiz L, Mena T, et al. Cluster Randomised Trials - Ivermectin Repurposing For COVID-19 Treatment Of Outpatients With Mild Disease In Primary Health Care Centers. ResearchSquare. 2021.
10. Dr Reddys Laboratories Limited. This study is to evaluate benefit of adding Molnupiravir over standard treatments in mild COVID-19 subjects. 2021. Accessed at CTRI at <http://www.ctri.nic.in/Clinicaltrials/pmaindet2.php?trialid=56374>.
11. Dra Ana Pueyo B. Outpatient treatment of COVID-19 with early pulmonary corticosteroids as an opportunity to modify the course of the disease; Tratamiento ambulatorio de COVID-19 con corticoides en fase de neumonía leve sin necesidad de ingreso como oportunidad de modificar el curso de la enfermedad. 2020. Accessed at EU Clinical Trials Register at <https://www.clinicaltrialsregister.eu/ctr-search/trial/2020-001622-64/ES> on 03/16/2022.
12. Duvignaud A, Lhomme E, Onaisi R, et al. Inhaled ciclesonide for outpatient treatment of COVID-19 in adults at risk of adverse outcomes: a randomised controlled trial (COVERAGE). Clinical microbiology and infection: the official publication of the European Society of Clinical Microbiology and Infectious Diseases. 2022.
13. Erasmus Medical Center. Early Convalescent Plasma Therapy for High-risk Patients With COVID-19 in Primary Care (the CoV-Early Study) (CoV-Early). 2020. Accessed at ClinicalTrials.gov at <https://clinicaltrials.gov/ct2/show/NCT04589949> on 03/17/2022.
14. F. M. H. College of Medicine and Dentistry. Effectiveness of Ivermectin in SARS-CoV-2/COVID-19 Patients. 2020. Accessed at clinicaltrials.gov at <https://clinicaltrials.gov/ct2/show/NCT04739410> on 03/16/2022.
15. Hinks TSC, Cureton L, Knight R, et al. Azithromycin versus standard care in patients with mild-to-moderate COVID-19 (ATOMIC2): an open-label, randomised trial. The Lancet Respiratory Medicine. 2021;9(10):1130-40.
16. Indian Council Of Medical Research. Study to assess the efficacy and safety of convalescent plasma in moderate COVID-19 disease. 2020. Accessed at CTRI at <http://www.ctri.nic.in/Clinicaltrials/pmaindet2.php?trialid=43149>.
17. Johnston C, Brown ER, Stewart J, et al. Hydroxychloroquine with or without azithromycin for treatment of early SARS-CoV-2 infection among high-risk outpatient adults: A randomized clinical trial. EClinicalMedicine. 2021;33:100773.

18. Khoo SH, Fitzgerald R, Fletcher T, et al. Optimal dose and safety of molnupiravir in patients with early SARS-CoV-2: a Phase I, open-label, dose-escalating, randomized controlled study. *The Journal of antimicrobial chemotherapy*. 2021;76(12):3286-95.
19. Koera University Guro Hospital. A Trial of Ciclesonide in Adults with Mild COVID-19. 2020. Accessed at CRIS at [https://cris.nih.go.kr/cris/search/detailSearch.do?seq=16795&search\\_page=L&search\\_lang=E&lang=E&latest=Y](https://cris.nih.go.kr/cris/search/detailSearch.do?seq=16795&search_page=L&search_lang=E&lang=E&latest=Y).
20. Lady Hardinge Medical College. A clinical Trial to Study the Effects of Hydroxychloroquine, Ciclesonide and Ivermectin in treatment of moderate COVID-19 illness. 2020. Accessed at CTRI at <http://www.ctri.nic.in/Clinicaltrials/pmaindet2.php?trialid=43364> on 03/16/2022.
21. M. S. N. Laboratories Private Limited. To Evaluate the Efficacy and Safety of Molnupiravir Capsule in Treatment of Subjects with Mild Corona virus Disease (COVID-19). 2021. Accessed at CTRI at <http://www.ctri.nic.in/Clinicaltrials/pmaindet2.php?trialid=56239> on 03/16/2022.
22. Metro Infectious Disease Consultants. Evaluating the Efficacy of Convalescent Plasma in Symptomatic Outpatients Infected With COVID-19. 2020. Accessed at clinicaltrials.gov at <https://clinicaltrials.gov/ct2/show/NCT04438057> on 03/16/2022.
23. Optimus Pharma Pvt Ltd. A clinical study to estimate the efficacy and safety of formulation of Molnupiravir in patients with Mild COVID-19 infection. 2021. Accessed at CTRI at <http://www.ctri.nic.in/Clinicaltrials/pmaindet2.php?trialid=56393> on 03/16/2022.
24. Oriol M, Marc C, Camila GB, et al. Hydroxychloroquine Alone or in Combination with Cobicistat-Boosted Darunavir for Treatment of Mild COVID-19: A Cluster-Randomized Clinical Trial. SSRN. 2020.
25. Sanjay R, Dan VN, Beverly L, et al. Inhaled Budesonide in the Treatment of Early COVID-19 Illness: A Randomised Controlled Trial. SSRN. 2021.
26. Song J-Y, Yoon J-G, Seo Y-B, et al. Ciclesonide Inhaler Treatment for Mild-to-Moderate COVID-19: A Randomized, Open-Label, Phase 2 Trial. *Journal of Clinical Medicine*. 2021;10(16):3545.
27. Strides Pharma Science Limited. A Clinical Study with Molnupiravir Capsules 800mg in COVID-19 Patients with Mild symptoms. 2021. Accessed at CTRI at <http://www.ctri.nic.in/Clinicaltrials/pmaindet2.php?trialid=56699> on 03/16/2022.
28. Tanta University. Remdesivir Efficacy in Coronavirus Disease. 2020. Accessed at ClinicalTrials.gov at <https://clinicaltrials.gov/ct2/show/NCT04345419> on 03/30/2022.
29. The University of The West Indies. WHO COVID-19 Solidarity Trial for COVID-19 Treatments. 2020. Accessed at clinicaltrials.gov at <https://clinicaltrials.gov/ct2/show/NCT04647669> on 03/16/2022.
30. University of Oxford Clinical Trials and Research Governance. Use of inhaled corticosteroids as treatment of early COVID-19 infection to prevent clinical deterioration and hospitalisation. 2020. Accessed at EU Clinical Trials Register at <https://www.clinicaltrialsregister.eu/ctr-search/trial/2020-001889-10/GB>.

### Ineligible Outcome (n=4)

1. Chang XL, Wu HL, Webb GM, et al. CCR5 Receptor Occupancy Analysis Reveals Increased Peripheral Blood CCR5+CD4+ T Cells Following Treatment With the Anti-CCR5 Antibody Leronlimab. *Front Immunol*. 2021;12:794638.
2. Esfahan University of Medical Sciences. Study the effect of Steroid on the outpatient treatment Covid-19 patients. 2020. Accessed at Iranian Registry of Clinical Trials at <https://www.irct.ir/trial/52709>.
3. Kitasato University. Study in COvid-19 Patients With iveRmectin (CORVETTE-01). 2021. Accessed at ClinicalTrials.gov at <https://clinicaltrials.gov/ct2/show/NCT04703205> on 03/17/2022.

4. South Valley University. Role of Ivermectin Nanosuspension as Nasal Spray in Treatment of Persistent Post covid19 Anosmia. 2021. Accessed at ClinicalTrials.gov at <https://clinicaltrials.gov/ct2/show/NCT04951362> on 03/17/2022.

### Fulltext Unretrievable (n=3)

1. Joy John M, Snehil K, Lovely T, et al. Assessing of the Factors Associated with Mortality Among the Patients of PLACID Trial (A Phase II, Open Label, Randomized Controlled Trial to Assess the Safety and Efficacy of Convalescent Plasma to Limit COVID-19 Associated Complications in Moderate Disease). SSRN. 2021.
2. Sudhakar Koudinya T, Dr. Subhra L, Rama Raju D, et al. Efficacy and Safety of Molnupiravir for the Treatment of Non-Hospitalized Adults With Mild COVID-19: A Randomized, Open-Label, Parallel-Group Phase 3 Trial. SSRN. 2022.
3. Sugiyama H. A multicenter, open-label, randomized controlled trial to evaluate the efficacy and safety of inhaled ciclesonide for asymptomatic and mild patients with COVID-19. JPRN. 2020.

### Ineligible Setting (n=12)

1. Ahangar N. Study of Ivermectin Effectiveness in treatment process, survival and cure rate of COVID-19 patients: a randomized clinical trial 2021. Accessed at Iranian Registry of Clinical Trials (IRCT) at <https://en.irct.ir/trial/55216> on 03/15/2022.
2. Ahmed S, Karim MM, Ross AG, et al. A five day course of ivermectin for the treatment of COVID-19 may reduce the duration of illness. International Journal of Infectious Diseases. 2021;103:214-6.
3. Blum VF, Cimerman S, Hunter JR, et al. Nitazoxanide superiority to placebo to treat moderate COVID-19 - A Pilot prove of concept randomized double-blind clinical trial. EClinicalMedicine. 2021;37:100981.
4. Dubée V, Roy P-M, Vielle B, et al. A placebo-controlled double blind trial of hydroxychloroquine in mild-to-moderate COVID-19. medRxiv. 2020:2020.10.19.20214940.
5. Heber S, Pereyra D, Schrottmaier WC, et al. A Model Predicting Mortality of Hospitalized Covid-19 Patients Four Days After Admission: Development, Internal and Temporal-External Validation. Front Cell Infect Microbiol. 2021;11:795026.
6. Khan K. Administration of Anti-SARS-CoV-2 Convalescent Plasma in Hospitalized, Non-ICU Patients With COVID-19. 2020. Accessed at ClinicalTrials.gov at <https://clinicaltrials.gov/ct2/show/NCT04467151> on 03/17/2022.
7. Lim SCL, Hor CP, Tay KH, et al. Efficacy of Ivermectin Treatment on Disease Progression Among Adults With Mild to Moderate COVID-19 and Comorbidities: The I-TECH Randomized Clinical Trial. JAMA internal medicine. 2022.
8. Niaee M, Gheibi N, Namdar P, et al. Ivermectin as an adjunct treatment for hospitalized adult COVID-19 patients: A randomized multi-center clinical trial; 2020.
9. Ortigoza MB, Yoon H, Goldfeld KS, et al. Efficacy and Safety of COVID-19 Convalescent Plasma in Hospitalized Patients: A Randomized Clinical Trial. JAMA Internal Medicine. 2022;182(2):115-26.
10. Ravi K, Ranjini R, Chandrima P, et al. Ivermectin as a potential treatment for mild to moderate COVID-19: A double blind randomized placebo-controlled trial. medRxiv. 2021.
11. Ridgeback Biotherapeutics LP. The Safety of Molnupiravir (EIDD-2801) and Its Effect on Viral Shedding of SARS-CoV-2 (END-COVID). 2020. Accessed at ClinicalTrials.gov at <https://clinicaltrials.gov/ct2/show/NCT04405739> on 03/15/2022.
12. Universidade Federal do Rio de Janeiro. Nitazoxanide Therapy for Patients With COVID-19 Pneumonia. 2020. Accessed at ClinicalTrials.gov at <https://clinicaltrials.gov/ct2/show/NCT04561219> on 03/17/2022.

**Supplement Table 6: Study Characteristics of Included Studies**

| Author, Year, Trial Name, Trial Registry No. Funding Risk of bias                                                                             | Design, Country, Duration (days) Dominant variant at time of study (%)*      | Eligibility criteria                                                                                                                                                                                                                   | N total (randomized), Interventions, N group                                                                                        | Population                                                                                                                                                                                                    | Baseline characteristics                                                                                                                                                                                                                                                                                                                                                       | Recovery, symptom duration, all-cause mortality, COVID-19 specific mortality, Hospitalization due to COVID-19 (n/N (%))                                                                                                                                                                                                                     | Incidence of any adverse events, incidence of serious adverse events (n/N (%))                                                                   |
|-----------------------------------------------------------------------------------------------------------------------------------------------|------------------------------------------------------------------------------|----------------------------------------------------------------------------------------------------------------------------------------------------------------------------------------------------------------------------------------|-------------------------------------------------------------------------------------------------------------------------------------|---------------------------------------------------------------------------------------------------------------------------------------------------------------------------------------------------------------|--------------------------------------------------------------------------------------------------------------------------------------------------------------------------------------------------------------------------------------------------------------------------------------------------------------------------------------------------------------------------------|---------------------------------------------------------------------------------------------------------------------------------------------------------------------------------------------------------------------------------------------------------------------------------------------------------------------------------------------|--------------------------------------------------------------------------------------------------------------------------------------------------|
| <b>Antiviral drugs</b>                                                                                                                        |                                                                              |                                                                                                                                                                                                                                        |                                                                                                                                     |                                                                                                                                                                                                               |                                                                                                                                                                                                                                                                                                                                                                                |                                                                                                                                                                                                                                                                                                                                             |                                                                                                                                                  |
| Lopinavir/Ritonavir                                                                                                                           |                                                                              |                                                                                                                                                                                                                                        |                                                                                                                                     |                                                                                                                                                                                                               |                                                                                                                                                                                                                                                                                                                                                                                |                                                                                                                                                                                                                                                                                                                                             |                                                                                                                                                  |
| Reis et al. 2021 (30)<br><br>TOGETHER<br><br>NCT04403100<br><br>Academic Foundation/non-profit professional organization<br><br>Some concerns | RCT (double-blinded),<br><br>Brazil<br><br>90<br><br>P.1 variant (gamma): NR | COVID-19 vaccine received: NR<br><br>Previous SARS-CoV-2 infection: NR<br><br>Presence and/or duration of symptoms: less than 8 days since onset of flulike symptoms<br><br>Disease severity: mild<br><br>Pregnant women: Not eligible | N=471<br><br>G1: 244<br>Lopinavir 1600 mg/Ritonavir 400 at day 1, Lopinavir 800 mg/Ritonavir 200 mg after<br><br>G2: 227<br>Placebo | Age, years, mean (SD):<br>median (range)<br>G1: 54 (18-94)<br>G2: 53 (18-80)<br><br>female (%):<br>G1: 55<br>G2: 53<br><br>Ethnicity (%):<br>Non-white:<br>G1: 97<br>G2: 96<br><br>Diagnostic tool:<br>RT-PCR | Proportion of symptomatic participants (%):<br>G1: 100<br>G2: 100<br><br>Duration of symptoms:<br>NR<br><br>Proportion of participants with previous infections:<br>NR<br><br>Time (days) since previous infection:<br>NR<br><br>Proportion of vaccinated participants:<br>NR<br><br>Disease severity (%):<br>Mild:<br>G1: 100<br>G2: 100<br><br>Currently pregnant (%):<br>NA | Recovery <sup>†</sup><br>NR<br><br>Symptom duration (time until symptom free):<br>NR<br><br>All-cause mortality:<br>At 90 days:<br>G1: 2/244 (1)<br>G2: 1/227 (0.4)<br>p=NR<br><br>COVID-19 specific mortality:<br>NR<br><br>Hospitalization due to COVID:<br>At 90 days<br>G1: 14/244 (6)<br>G2: 11/227 (5)<br>HR (95%CI) 1.16 (0.53-2.56) | Any AE:<br>At 90 days<br>G1: 92/232 (40)<br>G2: 46/220 (21)<br>p=NR<br><br>Serious AE:<br>At 90 days<br>G1: 20/232 (9)<br>G2: 12/220 (6)<br>p=NR |
| Molnupiravir                                                                                                                                  |                                                                              |                                                                                                                                                                                                                                        |                                                                                                                                     |                                                                                                                                                                                                               |                                                                                                                                                                                                                                                                                                                                                                                |                                                                                                                                                                                                                                                                                                                                             |                                                                                                                                                  |

| Author, Year, Trial Name, Trial Registry No. Funding Risk of bias          | Design, Country, Duration (days) Dominant variant at time of study (%)*                                                                                                                                                                                                                       | Eligibility criteria                                                                                                                                                                                                                                                    | N total (randomized), Interventions, N group                   | Population                                                                                                                                                                                           | Baseline characteristics                                                                                                                                                                                                                                                                                                                                                                                                                                                                                                                                                                        | Recovery, symptom duration, all-cause mortality, COVID-19 specific mortality, Hospitalization due to COVID-19 (n/N (%))                                                                                                                                                                                                                                                                                                                                        | Incidence of any adverse events, incidence of serious adverse events (n/N (%))                                                                                                                                              |
|----------------------------------------------------------------------------|-----------------------------------------------------------------------------------------------------------------------------------------------------------------------------------------------------------------------------------------------------------------------------------------------|-------------------------------------------------------------------------------------------------------------------------------------------------------------------------------------------------------------------------------------------------------------------------|----------------------------------------------------------------|------------------------------------------------------------------------------------------------------------------------------------------------------------------------------------------------------|-------------------------------------------------------------------------------------------------------------------------------------------------------------------------------------------------------------------------------------------------------------------------------------------------------------------------------------------------------------------------------------------------------------------------------------------------------------------------------------------------------------------------------------------------------------------------------------------------|----------------------------------------------------------------------------------------------------------------------------------------------------------------------------------------------------------------------------------------------------------------------------------------------------------------------------------------------------------------------------------------------------------------------------------------------------------------|-----------------------------------------------------------------------------------------------------------------------------------------------------------------------------------------------------------------------------|
| Jayk Bernal et al. 2022 (33)<br>MOVE-OUT<br>NCT04575597<br>Industry<br>Low | RCT (double-blinded),<br>US, Argentina, Brazil, Canada, Chile, Colombia, Egypt, France, Germany, Guatemala, Italy, Japan, Mexico, Philippines, Russia, South Africa, Spain, Taiwan, Ukraine, UK<br>29<br>B.1.617.2 variant (delta): 58<br>B.1.621 variant (mu): 21<br>P.1 variant (gamma): 11 | COVID-19 vaccine received: Not eligible<br>Previous SARS-CoV-2 infection: NR<br>Presence and/or duration of symptoms: at least one sign or symptom of Covid-19 within 5 days before randomization<br>Disease severity: mild or moderate<br>Pregnant women: Not eligible | N=1,433<br>G1: 716<br>Molnupiravir 800mg<br>G2: 717<br>Placebo | Age, years, median (range):<br>G1: 42.0 (18–90)<br>G2: 44.0 (18–88)<br><br>female (%):<br>G1: 54<br>G2: 49<br><br>Ethnicity (%):<br>Non-white:<br>G1: 44<br>G2: 43<br><br>Diagnostic tool:<br>RT-PCR | Proportion of symptomatic participants (%):<br>G1: 100<br>G2: 100<br><br>Duration of symptoms (Time from onset of Covid-19 signs or symptoms to randomization of ≤3 days – no. (%):<br>G1: 48<br>G2: 48<br><br>Proportion of participants with previous infections (%):<br>NR<br><br>Time (days) since previous infection:<br>NR<br><br>Proportion of vaccinated participants:<br>NA<br><br>Disease severity (%):<br>Mild<br>Overall: 55<br>G1: 55<br>G2: 54<br>Moderate<br>Overall: 45<br>G1: 44<br>G2: 45<br>Severe or unknown<br>Overall: 1<br>G1: 1<br>G2: 1<br><br>Currently pregnant (%): | Recovery <sup>†</sup> :<br>At 29 days:<br>G1: 312/645 (48)<br>G2: 314/650 (48)<br>OR 1.04 (95% CI 0.84 to 1.29)<br><br>Symptom duration (time until symptom free):<br>NR<br><br>All-cause mortality:<br>At 29 days:<br>G1: 1/709 (0.1)<br>G2: 9/699 (1)<br>p=NR<br><br>COVID-19 specific mortality:<br>At 29 days:<br>G1: 1/709 (0.1)<br>G2: 9/699 (1)<br>p=NR<br><br>Hospitalization due to COVID:<br>At 29 days:<br>G1: 44/709 (6)<br>G2: 55/699 (8)<br>p=NR | Any AE:<br>At 29 days:<br>G1: 216/710 (30)<br>G2: 231/701 (33)<br>difference (95% CI) –2.5% (–7.4 to 2.3)<br><br>Serious AE:<br>At 29 days:<br>G1: 49/710 (7)<br>G2: 67/701 (10)<br>difference (95% CI) –2.7% (–5.6 to 0.2) |

| Author, Year, Trial Name, Trial Registry No. Funding Risk of bias | Design, Country, Duration (days) Dominant variant at time of study (%)*              | Eligibility criteria                                                                                                                                                                                                                                                     | N total (randomized), Interventions, N group                                                                               | Population                                                                                                                                                                                                                                                                          | Baseline characteristics                                                                                                                                                                                                                                                                                                                                                                                                                                                                           | Recovery, symptom duration, all-cause mortality, COVID-19 specific mortality, Hospitalization due to COVID-19 (n/N (%))                                                                                                                                                                                                                                   | Incidence of any adverse events, incidence of serious adverse events (n/N (%))                                                                                                                                   |
|-------------------------------------------------------------------|--------------------------------------------------------------------------------------|--------------------------------------------------------------------------------------------------------------------------------------------------------------------------------------------------------------------------------------------------------------------------|----------------------------------------------------------------------------------------------------------------------------|-------------------------------------------------------------------------------------------------------------------------------------------------------------------------------------------------------------------------------------------------------------------------------------|----------------------------------------------------------------------------------------------------------------------------------------------------------------------------------------------------------------------------------------------------------------------------------------------------------------------------------------------------------------------------------------------------------------------------------------------------------------------------------------------------|-----------------------------------------------------------------------------------------------------------------------------------------------------------------------------------------------------------------------------------------------------------------------------------------------------------------------------------------------------------|------------------------------------------------------------------------------------------------------------------------------------------------------------------------------------------------------------------|
|                                                                   |                                                                                      |                                                                                                                                                                                                                                                                          |                                                                                                                            |                                                                                                                                                                                                                                                                                     | NA                                                                                                                                                                                                                                                                                                                                                                                                                                                                                                 |                                                                                                                                                                                                                                                                                                                                                           |                                                                                                                                                                                                                  |
| Fischer et al. 2022 (31)<br>NA<br>NCT04405570<br>Industry<br>Low  | RCT (double-blinded),<br>U.S.,<br>28<br>B.1.1.7 (alpha): NR<br>B.1.617.2 (delta): NR | COVID-19 vaccine received: Not eligible<br><br>Previous SARS-CoV-2 infection: NR<br><br>Presence and/or duration of symptoms: at least one SARS-CoV-2 infection symptom within 7 days before study begin<br><br>Disease severity: NR<br><br>Pregnant women: Not eligible | N=204<br>G1: 23<br>Molnupiravir 200mg<br>G2: 62<br>Molnupiravir 400mg<br>G3: 55<br>Molnupiravir 800mg<br>G4: 62<br>Placebo | Age, years median (range):<br>G1: 32.0 (19-65)<br>G2: 42.5 (19-82)<br>G3: 42.0 (18-68)<br>G4: 39.0 (19-71)<br><br>female (%):<br>G1: 48<br>G2: 52<br>G3: 49<br>G4: 55<br><br>Ethnicity (%):<br>Non-white:<br>G1: 26<br>G2: 10<br>G3: 11<br>G4: 13<br><br>Diagnostic tool:<br>RT-PCR | Proportion of symptomatic participants (%):<br>G1: 100<br>G2: 100<br>G3: 100<br>G4: 100<br><br>Duration of symptoms:<br>At baseline (median (range)):<br>G1: 4.00 (1.8–7.0)<br>G2: 4.85 (2.5–7.1)<br>G3: 4.60 (1.4–7.1)<br>G4: 4.55 (1.8–7.5)<br><br>Proportion of participants with previous infections (%):<br>NR<br><br>Time (days) since previous infection:<br>NR<br><br>Proportion of vaccinated participants:<br>NA<br><br>Disease severity (%):<br>NR<br><br>Currently pregnant (%):<br>NA | Recovery <sup>†</sup> :<br>NR<br><br>Symptom duration (time until symptom free):<br>Median (95% CI)<br>G1: 9.0 days (6.0 to 13.0)<br>G2: 5.5 days (4.0 to 8.0)<br>G3: 8.0 days (6.0 to 12.0)<br>G4: 8.5 days (7.0 to 11.0)<br>p=NR<br><br>All-cause mortality:<br>NR<br><br>COVID-19 specific mortality:<br>NR<br><br>Hospitalization due to COVID:<br>NR | Any AE:<br>At 28 days:<br>G1: 11/23 (48)<br>G2: 20/62 (32)<br>G3: 11/55 (20)<br>G4: 18/62 (29)<br>p=NR<br><br>Serious AE:<br>At 28 days:<br>G1: 0/23 (0)<br>G2: 2/62 (3)<br>G3: 1/55 (2)<br>G4: 1/62 (2)<br>p=NR |
| Nirmatrelvir/Ritonavir                                            |                                                                                      |                                                                                                                                                                                                                                                                          |                                                                                                                            |                                                                                                                                                                                                                                                                                     |                                                                                                                                                                                                                                                                                                                                                                                                                                                                                                    |                                                                                                                                                                                                                                                                                                                                                           |                                                                                                                                                                                                                  |

| Author, Year, Trial Name, Trial Registry No. Funding Risk of bias          | Design, Country, Duration (days) Dominant variant at time of study (%)*                                                                                                                                                                                                             | Eligibility criteria                                                                                                                                                                                                                                                                                                 | N total (randomized), Interventions, N group                                      | Population                                                                                                                                                                                                                | Baseline characteristics                                                                                                                                                                                                                                                                                                                                         | Recovery, symptom duration, all-cause mortality, COVID-19 specific mortality, Hospitalization due to COVID-19 (n/N (%))                                                                                                                                                                                                                                                   | Incidence of any adverse events, incidence of serious adverse events (n/N (%))                                                                           |
|----------------------------------------------------------------------------|-------------------------------------------------------------------------------------------------------------------------------------------------------------------------------------------------------------------------------------------------------------------------------------|----------------------------------------------------------------------------------------------------------------------------------------------------------------------------------------------------------------------------------------------------------------------------------------------------------------------|-----------------------------------------------------------------------------------|---------------------------------------------------------------------------------------------------------------------------------------------------------------------------------------------------------------------------|------------------------------------------------------------------------------------------------------------------------------------------------------------------------------------------------------------------------------------------------------------------------------------------------------------------------------------------------------------------|---------------------------------------------------------------------------------------------------------------------------------------------------------------------------------------------------------------------------------------------------------------------------------------------------------------------------------------------------------------------------|----------------------------------------------------------------------------------------------------------------------------------------------------------|
| Hammond et al. 2022 (35)<br>NA<br>NCT04960202<br>Industry<br>Some concerns | RCT (double-blinded),<br>US, Bulgaria, South Africa, Brazil, India, Mexico, Ukraine, Turkey, Japan, Spain, Russia, Argentina, Colombia, Poland, South Korea, Hungary, Taiwan, Malaysia, Czech Republic, Thailand, Puerto Rico<br>28<br>B.1.1.7 (alpha): NR<br>B.1.617.2 (delta): NR | COVID-19 vaccine received: Not eligible<br>Previous SARS-CoV-2 infection: not eligible<br>Presence and/or duration of symptoms: at least one sign or symptom of Covid-19 on the day of randomization; symptom onset no more than 5 days before randomization<br>Disease severity: NR<br>Pregnant women: Not eligible | N=2,246<br>G1: 1,120<br>Nirmatrelvir 600mg/ritonavir 200mg<br>G2: 1126<br>Placebo | Age, years, mean (SD):<br>Median (range)<br>G1: 45.0 (18.0–86.0)<br>G2: 46.5 (18.0–88.0)<br><br>female (%):<br>G1: 50<br>G2: 48<br><br>Ethnicity (%):<br>Non-white:<br>G1: 29<br>G2: 28<br><br>Diagnostic tool:<br>RT-PCR | Proportion of symptomatic participants (%):<br>G1: 100<br>G2: 100<br><br>Duration of symptoms:<br>G1: 3 (1)<br>G2: 3 (1)<br><br>Proportion of participants with previous infections: NA<br><br>Time (days) since previous infection: NA<br><br>Proportion of vaccinated participants: NA<br><br>Disease severity (%):<br>NR<br><br>Currently pregnant (%):<br>NA | Recovery <sup>†</sup> :<br>NR<br><br>Symptom duration (time until symptom free):<br>NR<br><br>All-cause mortality:<br>At 28 days:<br>G1: 0/1039 (0)<br>G2: 12/1046 (1)<br>p=NR<br><br>COVID-19 specific mortality:<br>NR<br><br>Hospitalization due to COVID:<br>At 28 days:<br>G1: 8/1039 (1)<br>G2: 65/1046 (6)<br>Difference (SE) –5.62% (0.81) 95% CI –7.21 to –4.03) | Any AE:<br>At 34 days:<br>G1: 251/1109 (23)<br>G2: 266/1115 (24)<br>p=NR<br><br>Serious AE:<br>At 34 days:<br>G1: 18/1109 (2)<br>G2: 74/1115 (7)<br>p=NR |
| Remdesivir                                                                 |                                                                                                                                                                                                                                                                                     |                                                                                                                                                                                                                                                                                                                      |                                                                                   |                                                                                                                                                                                                                           |                                                                                                                                                                                                                                                                                                                                                                  |                                                                                                                                                                                                                                                                                                                                                                           |                                                                                                                                                          |



| Author, Year, Trial Name, Trial Registry No. Funding Risk of bias                                                    | Design, Country, Duration (days) Dominant variant at time of study (%)*                                         | Eligibility criteria                                                                                                                                                                                                                                                                                                                                                                                      | N total (randomized), Interventions, N group                                                         | Population                                                                                                                                                                            | Baseline characteristics                                                                                                                                                                                                                                                                                                                                                                                  | Recovery, symptom duration, all-cause mortality, COVID-19 specific mortality, Hospitalization due to COVID-19 (n/N (%))                                                                                                                                                                                                                                                                                      | Incidence of any adverse events, incidence of serious adverse events (n/N (%))                                                                       |
|----------------------------------------------------------------------------------------------------------------------|-----------------------------------------------------------------------------------------------------------------|-----------------------------------------------------------------------------------------------------------------------------------------------------------------------------------------------------------------------------------------------------------------------------------------------------------------------------------------------------------------------------------------------------------|------------------------------------------------------------------------------------------------------|---------------------------------------------------------------------------------------------------------------------------------------------------------------------------------------|-----------------------------------------------------------------------------------------------------------------------------------------------------------------------------------------------------------------------------------------------------------------------------------------------------------------------------------------------------------------------------------------------------------|--------------------------------------------------------------------------------------------------------------------------------------------------------------------------------------------------------------------------------------------------------------------------------------------------------------------------------------------------------------------------------------------------------------|------------------------------------------------------------------------------------------------------------------------------------------------------|
| Gottlieb et al. 2021 (44)<br><br>NCT04501952;<br>EudraCT number, 2020-003510-12<br><br>Industry<br><br>Some concerns | RCT (double-blinded),<br>US, Denmark, Spain, UK<br><br>28<br><br>B B.1.1.7 (alpha): NR<br>B.1.617.2 (delta): NR | COVID-19 vaccine received:<br>Not eligible<br><br>Previous SARS-CoV-2 infection:<br>not eligible if required prior hospitalization for COVID-19 or treatment<br><br>Presence and/or duration of symptoms: at least one ongoing symptom consistent with Covid-19, with onset of the first symptom within 7 days before randomization<br><br>Disease severity:<br>NR<br><br>Pregnant women:<br>Not eligible | N=584<br><br>G1: 292<br>Remdesivir 200 mg on day 1, 100 mg on days 2 and 3<br><br>G2: 292<br>Placebo | Age, years, mean (SD):<br>G1: 50 (15)<br>G2: 51 (15)<br><br>female (%):<br>G1: 47<br>G2: 49<br><br>Ethnicity (%):<br>Non-white:<br>G1: 21<br>G2: 18<br><br>Diagnostic tool:<br>RT-PCR | Proportion of symptomatic participants (%):<br>G1: 100<br>G2: 100<br><br>Duration of symptoms:<br>Median time (IQR) - days<br>G1: 5 (3–6)<br>G2: 5 (4–6)<br><br>Proportion of participants with previous infections:<br>NR<br><br>Time (days) since previous infection:<br>NR<br><br>Proportion of vaccinated participants:<br>NA<br><br>Disease severity (%):<br>NR<br><br>Currently pregnant (%):<br>NA | Recovery <sup>†</sup> :<br>G1: 61/169 (36)<br>G2: 33/165 (20)<br>Rate Ratio 1.92 (95% CI 1.26-2.94)<br><br>Symptom duration (time until symptom free):<br>NR<br><br>All-cause mortality:<br>At 28 days:<br>G1: 0/279 (0)<br>G2: 0/283 (0)<br><br>COVID-19 specific mortality:<br>NR<br><br>Hospitalization due to any cause:<br>At 28 days:<br>G1: 5/279 (2)<br>G2: 18/283 (6)<br>HR 0.28 (95% CI 0.10-0.75) | Any AE:<br>At 28 days:<br>G1: 118 /279 (42)<br>G2: 131/283 (46)<br>p=NR<br><br>Serious AE:<br>At 28 days:<br>G1: 5/279 (2)<br>G2: 19/283 (7)<br>p=NR |
| <b><i>Monoclonal antibodies</i></b>                                                                                  |                                                                                                                 |                                                                                                                                                                                                                                                                                                                                                                                                           |                                                                                                      |                                                                                                                                                                                       |                                                                                                                                                                                                                                                                                                                                                                                                           |                                                                                                                                                                                                                                                                                                                                                                                                              |                                                                                                                                                      |
| Casirivimab/Imdevimab                                                                                                |                                                                                                                 |                                                                                                                                                                                                                                                                                                                                                                                                           |                                                                                                      |                                                                                                                                                                                       |                                                                                                                                                                                                                                                                                                                                                                                                           |                                                                                                                                                                                                                                                                                                                                                                                                              |                                                                                                                                                      |

| Author, Year, Trial Name, Trial Registry No. Funding Risk of bias                                                                                                                                                                                                     | Design, Country, Duration (days) Dominant variant at time of study (%)*                        | Eligibility criteria                                                                                                                                                                                                                                                                 | N total (randomized), Interventions, N group                                                                                                                                                                                                                      | Population                                                                                                                                                                                                                                                                                                                                                                  | Baseline characteristics                                                                                                                                                                                                                                                                                                                                                                                                                                                                   | Recovery, symptom duration, all-cause mortality, COVID-19 specific mortality, Hospitalization due to COVID-19 (n/N (%))                                                                                                                                                                                                                                                                                                                                                                                                          | Incidence of any adverse events, incidence of serious adverse events (n/N (%))                                                                                                                                                       |
|-----------------------------------------------------------------------------------------------------------------------------------------------------------------------------------------------------------------------------------------------------------------------|------------------------------------------------------------------------------------------------|--------------------------------------------------------------------------------------------------------------------------------------------------------------------------------------------------------------------------------------------------------------------------------------|-------------------------------------------------------------------------------------------------------------------------------------------------------------------------------------------------------------------------------------------------------------------|-----------------------------------------------------------------------------------------------------------------------------------------------------------------------------------------------------------------------------------------------------------------------------------------------------------------------------------------------------------------------------|--------------------------------------------------------------------------------------------------------------------------------------------------------------------------------------------------------------------------------------------------------------------------------------------------------------------------------------------------------------------------------------------------------------------------------------------------------------------------------------------|----------------------------------------------------------------------------------------------------------------------------------------------------------------------------------------------------------------------------------------------------------------------------------------------------------------------------------------------------------------------------------------------------------------------------------------------------------------------------------------------------------------------------------|--------------------------------------------------------------------------------------------------------------------------------------------------------------------------------------------------------------------------------------|
| Weinreich et al. 2021 (25)<br><br>Safety, Tolerability, and Efficacy of Anti-Spike (S) SARS-CoV-2 Monoclonal Antibodies for the Treatment of Ambulatory Adult and Pediatric Patients With COVID-19<br><br>NCT04425629<br><br>Government Industry<br><br>Some concerns | RCT (double-blinded), US, Mexico<br><br>29<br><br>B.1.1.7 (alpha): NR<br>B.1.617.2 (delta): NR | COVID-19 vaccine received: Not eligible<br><br>Previous SARS-CoV-2 infection: NR<br><br>Presence and/or duration of symptoms: the onset of any Covid-19 symptom, occurring no more than 7 days before randomization,<br><br>Disease severity: NR<br><br>Pregnant women: Not eligible | N=5,607 (1040 excluded after randomization; safety population n=5,531)<br><br>G1: 1,529 Casirivimab/imdevimab 2400 mg<br><br>G2: 838 Casirivimab/imdevimab 1200 mg<br><br>G3: 700 Casirivimab/imdevimab 8000 mg<br><br>G4: 840 Placebo<br><br>G5: 1,500 Placebo** | Age, years:<br>At least 1 risk factor:<br>Median (IQR)<br>G1: 50.0 (39.0–60.0)<br>G2: 48.5 (37.0–57.5)<br>G3: 51.0 (40.0–59.0)<br>G4: 48.0 (35.0–57.0)<br>G5: 50.0 (37.0–58.0)<br><br>female (%):<br>G1: 52<br>G2: 53<br>G3: 48<br>G4: 50<br>G5: 53<br><br>Ethnicity (%):<br>Non-white:<br>G1: 14<br>G2: 19<br>G3: 15<br>G4: 18<br>G5: 15<br><br>Diagnostic tool:<br>RT-PCR | Proportion of symptomatic participants (%):<br>G1: 100<br>G2: 100<br>G3: 100<br>G4: 100<br>G5: 100<br><br>Duration of symptoms:<br>Median (IQR)<br>G1: 3.0 (2–5)<br>G2: 3.0 (2–5)<br>G3: 3.0 (2–5)<br>G4: 3.0 (2–4)<br>G5: 3.0 (2–5)<br><br>Proportion of participants with previous infections (%):<br>NR<br><br>Time (days) since previous infection:<br>NR<br><br>Proportion of vaccinated participants (%): NA<br><br>Disease severity (%):<br>NR<br><br>Currently pregnant (%):<br>NA | Recovery <sup>†</sup> :<br>NR<br><br>Symptom duration (time until symptom free):<br>At 29 days:<br>Median days<br>G1: 10<br>G2: 10<br>G3: NR<br>G4: NR<br>G5: 14<br>p< 0.001<br><br>All-cause mortality:<br>At 29 days:<br>G1: 1/1355 (<0.1)<br>G2: 1/736 (0.1)<br>G3: 0/625 (0)<br>G4: 1/748 (0.1)<br>G5: 3/1341 (0.2)<br>p=NR<br><br>COVID-19 specific mortality:<br>NR<br><br>Hospitalization due to COVID:<br>At 29 days:<br>G1: 17/1355 (1)<br>G2: 6/736 (1)<br>G3: 13/625 (2)<br>G4: 23/748 (3)<br>G5: 59/1341 (4)<br>p=NR | Any AE:<br>At 45 days:<br>G1: 142/1849 (8)<br>G2: 59/827 (7)<br>G3: 85/1012 (8)<br>G4: NR<br>G5: 189/1843 (10)<br><br>Serious AE:<br>At 45 days:<br>G1: 24/1849 (1)<br>G2: 9/827 (1)<br>G3: 17/1012 (2)<br>G4: NR<br>G5: 74/1843 (4) |

| Author, Year, Trial Name, Trial Registry No. Funding Risk of bias                              | Design, Country, Duration (days) Dominant variant at time of study (%)*                                       | Eligibility criteria                                                                                                                                                                                                                                                                                                                 | N total (randomized), Interventions, N group                                                                                            | Population                                                                                                                                                                                                                                                                       | Baseline characteristics                                                                                                                                                                                                                                                                                                                                                                                                                                                                                    | Recovery, symptom duration, all-cause mortality, COVID-19 specific mortality, Hospitalization due to COVID-19 (n/N (%))                                                                                                                                                         | Incidence of any adverse events, incidence of serious adverse events (n/N (%))                                                                                                               |
|------------------------------------------------------------------------------------------------|---------------------------------------------------------------------------------------------------------------|--------------------------------------------------------------------------------------------------------------------------------------------------------------------------------------------------------------------------------------------------------------------------------------------------------------------------------------|-----------------------------------------------------------------------------------------------------------------------------------------|----------------------------------------------------------------------------------------------------------------------------------------------------------------------------------------------------------------------------------------------------------------------------------|-------------------------------------------------------------------------------------------------------------------------------------------------------------------------------------------------------------------------------------------------------------------------------------------------------------------------------------------------------------------------------------------------------------------------------------------------------------------------------------------------------------|---------------------------------------------------------------------------------------------------------------------------------------------------------------------------------------------------------------------------------------------------------------------------------|----------------------------------------------------------------------------------------------------------------------------------------------------------------------------------------------|
| Regdanvimab                                                                                    |                                                                                                               |                                                                                                                                                                                                                                                                                                                                      |                                                                                                                                         |                                                                                                                                                                                                                                                                                  |                                                                                                                                                                                                                                                                                                                                                                                                                                                                                                             |                                                                                                                                                                                                                                                                                 |                                                                                                                                                                                              |
| Kim et al. 2021 (42)<br><br>NR<br><br>NCT04593641<br><br>Government, Industry<br>Some concerns | RCT (double-blinded),<br><br>Multicountry, Republic of Korea and Romania<br><br>14<br><br>B.1.1.7 (alpha): NR | COVID-19 vaccine received: no vaccination within 4 weeks<br><br>Previous SARS-CoV-2 infection: NR<br><br>Presence and/or duration of symptoms: at least 1 or more symptoms and onset within 7 days before drug administration and oxygen saturation of 94% or more<br><br>Disease severity: mild<br><br>Pregnant women: Not eligible | N=18<br><br>G1: 5<br>Regdanvimab (CT-P59) 20mg/kg<br><br>G2: 5<br>CT-P59 40mg/kg<br><br>G3: 5<br>CT-P59 80mg/kg<br><br>G4: 3<br>placebo | Age, years, median (IQR):<br>G1: 59.0 (56–59)<br>G2: 51.0 (48–52)<br>G3: 52.0 (43–57)<br>G4: 50.0 (49–57)<br><br>female (%):<br>G1: 60<br>G2: 60<br>G3: 0<br>G4: 33<br><br>Ethnicity (%):<br>Non-white:<br>G1: 100<br>G2: 0<br>G3: 0<br>G4: 33<br><br>Diagnostic tool:<br>RT-PCR | Proportion of symptomatic participants (%):<br>G1: 100<br>G2: 100<br>G3: 100<br>G4: 100<br><br>Duration of symptoms: median (IQR) days:<br>G1: 4.0 (3–5)<br>G2: 6.0 (5–6)<br>G3: 4.0 (4–4)<br>G4: 4.0 (4–6)<br><br>Proportion of participants with previous infections:<br>NR<br><br>Time (days) since previous infection:<br>NR<br><br>Proportion of vaccinated participants:<br>NR<br><br>Disease severity (%):<br>Mild:<br>G1: 100<br>G2: 100<br>G3: 100<br>G4: 100<br><br>Currently pregnant (%):<br>NA | Recovery <sup>†</sup> :<br>NR<br><br>Symptom duration (time until symptom free):<br>G1: 4.4 days<br>G2: 3.2 days<br>G3: 2.5 days<br>G4: 5.3 days<br>p=NR<br><br>All-cause mortality:<br>NR<br><br>COVID-19 specific mortality:<br>NR<br><br>Hospitalization due to COVID:<br>NR | Any AE:<br>At 14 days:<br>G1: 3/5 (60)<br>G2: 4/5 (80)<br>G3: 3/5 (60)<br>G4: 1/3 (33)<br>p=NR<br><br>Serious AE:<br>At 14 days:<br>G1: 0/5 (0)<br>G2: 0/5 (0)<br>G3: 0/5 (0)<br>G4: 0/3 (0) |

| Author, Year, Trial Name, Trial Registry No. Funding Risk of bias                                                   | Design, Country, Duration (days) Dominant variant at time of study (%)*                                  | Eligibility criteria                                                                                                                                                                                                                                                                                                | N total (randomized), Interventions, N group                                                                  | Population                                                                                                                                                                                                                                              | Baseline characteristics                                                                                                                                                                                                                                                                                                                                                                                                                                                 | Recovery, symptom duration, all-cause mortality, COVID-19 specific mortality, Hospitalization due to COVID-19 (n/N (%))                                                                                                                                                                                                                                                                                                                                                                                                                | Incidence of any adverse events, incidence of serious adverse events (n/N (%))                                                                                               |
|---------------------------------------------------------------------------------------------------------------------|----------------------------------------------------------------------------------------------------------|---------------------------------------------------------------------------------------------------------------------------------------------------------------------------------------------------------------------------------------------------------------------------------------------------------------------|---------------------------------------------------------------------------------------------------------------|---------------------------------------------------------------------------------------------------------------------------------------------------------------------------------------------------------------------------------------------------------|--------------------------------------------------------------------------------------------------------------------------------------------------------------------------------------------------------------------------------------------------------------------------------------------------------------------------------------------------------------------------------------------------------------------------------------------------------------------------|----------------------------------------------------------------------------------------------------------------------------------------------------------------------------------------------------------------------------------------------------------------------------------------------------------------------------------------------------------------------------------------------------------------------------------------------------------------------------------------------------------------------------------------|------------------------------------------------------------------------------------------------------------------------------------------------------------------------------|
| Streinu-Cercel et al. 2021 (34)<br><br>NCT04602000 and EudraCT 2020-003369-20<br><br>Government Industry<br><br>Low | RCT (double-blinded),<br><br>Republic of Korea, Romania, Spain, USA<br><br>28<br><br>B.1.1.7 (alpha): NR | COVID-19 vaccine received: Not eligible<br><br>Previous SARS-CoV-2 infection: NR<br><br>Presence and/or duration of symptoms: at least one infection-associated symptom within 7 and 2 days and an oxygen saturation of more than 94%<br><br>Disease severity: mild to moderate<br><br>Pregnant women: Not eligible | N=327<br><br>G1: 105<br>Regdanvimab 40 mg/kg<br><br>G2: 111<br>Regdanvimab 80 mg/kg<br><br>G3: 111<br>Placebo | Age, years, median (range):<br>G1: 51.0 (42-60)<br>G2: 51.0 (40-60)<br>G3: 52.0 (41-60)<br><br>female (%):<br>G1: 44<br>G2: 47<br>G3: 57<br><br>Ethnicity (%):<br>Non-White:<br>G1: 10<br>G2: 13<br>G3: 13<br><br>Diagnostic tool:<br>RT-PCR or antigen | Proportion of symptomatic participants (%):<br>G1: 100<br>G2: 100<br>G3: 100<br><br>Duration of symptoms:<br>Median (range)<br>G1: 3.0 (2-4)<br>G2: 3.0 (2-4)<br>G3: 3.0 (2-4)<br><br>Proportion of participants with previous infections (%):<br>NR<br><br>Time (days) since previous infection:<br>NR<br><br>Proportion of vaccinated participants:<br>NA<br><br>Disease severity (%):<br>Moderate:<br>G1: 61<br>G2: 59<br>G3: 54<br><br>Currently pregnant (%):<br>NA | Recovery <sup>†</sup> :<br>At 28 days:<br>G1: 82/94 (87)<br>G2: 79/92 (86)<br>G3: 71/99 (72)<br>RR 1.21 (95% CI 1.05 to 1.38)<br><br>Symptom duration (time until symptom free):<br>Median days (95%CI)<br>G1: 6.9 (5.5–9.4)<br>G2: 7.3 (5.7–9.3)<br>G3: 8.8 (7.0–11.8)<br>p=NR<br><br>All-cause mortality:<br>At 28 days:<br>G1: 0/105 (0)<br>G2: 0/110 (0)<br>G3: 0/110 (0)<br><br>COVID-19 specific mortality:<br>NR<br><br>Hospitalization due to COVID:<br>At 28 Days:<br>G1: 4/100 (4)<br>G2: 5/103 (5)<br>G3: 9/104 (9)<br>p=NR | Any AE:<br>At 28 Days:<br>G1: 31/105 (30)<br>G2: 27/110 (25)<br>G3: 34/110 (31)<br>p=NR<br><br>Serious AE:<br>At 28 days:<br>G1: 0/105 (0)<br>G2: 0/110 (0)<br>G3: 0/110 (0) |
| Sotrovimab                                                                                                          |                                                                                                          |                                                                                                                                                                                                                                                                                                                     |                                                                                                               |                                                                                                                                                                                                                                                         |                                                                                                                                                                                                                                                                                                                                                                                                                                                                          |                                                                                                                                                                                                                                                                                                                                                                                                                                                                                                                                        |                                                                                                                                                                              |

| Author, Year, Trial Name, Trial Registry No. Funding Risk of bias     | Design, Country, Duration (days) Dominant variant at time of study (%)*                                                   | Eligibility criteria                                                                                                                                                                                                                  | N total (randomized), Interventions, N group               | Population                                                                                                                                                                                                               | Baseline characteristics                                                                                                                                                                                                                                                                                                                                                                                                                             | Recovery, symptom duration, all-cause mortality, COVID-19 specific mortality, Hospitalization due to COVID-19 (n/N (%))                                                                                                                                                                                                | Incidence of any adverse events, incidence of serious adverse events (n/N (%))                                                                   |
|-----------------------------------------------------------------------|---------------------------------------------------------------------------------------------------------------------------|---------------------------------------------------------------------------------------------------------------------------------------------------------------------------------------------------------------------------------------|------------------------------------------------------------|--------------------------------------------------------------------------------------------------------------------------------------------------------------------------------------------------------------------------|------------------------------------------------------------------------------------------------------------------------------------------------------------------------------------------------------------------------------------------------------------------------------------------------------------------------------------------------------------------------------------------------------------------------------------------------------|------------------------------------------------------------------------------------------------------------------------------------------------------------------------------------------------------------------------------------------------------------------------------------------------------------------------|--------------------------------------------------------------------------------------------------------------------------------------------------|
| Gupta et al. 2022 (38)<br>COMET-ICE<br>NCT04545060<br>Industry<br>Low | RCT (double-blinded), USA, Canada, Brazil, Spain<br>29<br>B.1.1.7 (alpha): NR<br>B.1.617.2 (delta): NR<br>P.1 (gamma): NR | COVID-19 vaccine received: NR<br>Previous SARS-CoV-2 infection: NR<br>Presence and/or duration of symptoms: symptoms in the last five days before randomization<br>Disease severity: mild to moderate<br>Pregnant women: Not eligible | N=1057<br>G1=528<br>Sotrovimab 500 mg<br>G2=529<br>Placebo | Age, years, median IQR:<br>Overall: NR<br>G1: 53 (41.5-62)<br>G2: 53 (43-63)<br><br>female (%):<br>G1: 57<br>G2: 52<br><br>Ethnicity (%):<br>Non-white:<br>G1: 13<br>G2: 12<br><br>Diagnostic tool:<br>RT-PCR or antigen | Proportion of symptomatic participants (%):<br>G1: 100<br>G2: 100<br><br>Duration of symptoms (%):<br>G1: ≤3 days- 59<br>4-5 days- 40<br>5 days- <1<br>G2: ≤3 days- 59<br>4-5 days- 41<br>5 days- 0<br><br>Proportion of participants with previous infections:<br>NR<br><br>Time (days) since previous infection:<br>NR<br><br>Proportion of vaccinated participants:<br>NR<br><br>Disease severity (%):<br>NR<br><br>Currently pregnant (%):<br>NA | Recovery <sup>†</sup> :<br>NR<br><br>Symptom duration (time until symptom free):<br>NR<br><br>All-cause mortality:<br>At 29 days:<br>G1: 0/528 (0)<br>G2: 2/529 (0.4)<br>p=NR<br><br>COVID-19 specific mortality:<br>NR<br><br>Hospitalization due to COVID:<br>At 29 days:<br>G1: 6/528 (1)<br>G2: 30/529 (6)<br>p=NR | Any AE:<br>At day 29<br>G1: 114/523 (22)<br>G2: 123/526 (23)<br>p=NR<br><br>Serious AE:<br>At day 29<br>G1: 11/523 (2)<br>G2: 32/526 (6)<br>p=NR |
| <b>Antibiotic or antiparasitic drugs</b>                              |                                                                                                                           |                                                                                                                                                                                                                                       |                                                            |                                                                                                                                                                                                                          |                                                                                                                                                                                                                                                                                                                                                                                                                                                      |                                                                                                                                                                                                                                                                                                                        |                                                                                                                                                  |
| Azithromycin                                                          |                                                                                                                           |                                                                                                                                                                                                                                       |                                                            |                                                                                                                                                                                                                          |                                                                                                                                                                                                                                                                                                                                                                                                                                                      |                                                                                                                                                                                                                                                                                                                        |                                                                                                                                                  |
| Oldenburg et al. 2021 (41)<br>ACTION: The Azithromycin for            | RCT (double-blinded), U.S.                                                                                                | COVID-19 vaccine received: NR<br>Previous SARS-                                                                                                                                                                                       | N=263<br>G1: 171<br>Azithromycin 1.2g oral                 | Age, years, mean (SD): median (IQR)<br>G1: 42 (35-49)<br>G2: 44 (35-51)                                                                                                                                                  | Proportion of symptomatic participants (%):<br>G1: 93<br>G2: 93                                                                                                                                                                                                                                                                                                                                                                                      | Recovery <sup>†</sup><br>At 14 days:<br>G1: 66/131 (50)<br>G2: 35/70 (50)<br>Prevalence ratio 1.01 (95%                                                                                                                                                                                                                | Any AE:<br>At 3 days:<br>G1: 82/145 (57)<br>G2: 19/72 (26)<br>p=NR                                                                               |

| Author, Year, Trial Name, Trial Registry No. Funding Risk of bias                                                                             | Design, Country, Duration (days) Dominant variant at time of study (%)* | Eligibility criteria                                                                                                                                                  | N total (randomized), Interventions, N group                                                                                                                        | Population                                                                                                                                                        | Baseline characteristics                                                                                                                                                                                                                                                                                            | Recovery, symptom duration, all-cause mortality, COVID-19 specific mortality, Hospitalization due to COVID-19 (n/N (%))                                                                                                                                                                      | Incidence of any adverse events, incidence of serious adverse events (n/N (%))                  |
|-----------------------------------------------------------------------------------------------------------------------------------------------|-------------------------------------------------------------------------|-----------------------------------------------------------------------------------------------------------------------------------------------------------------------|---------------------------------------------------------------------------------------------------------------------------------------------------------------------|-------------------------------------------------------------------------------------------------------------------------------------------------------------------|---------------------------------------------------------------------------------------------------------------------------------------------------------------------------------------------------------------------------------------------------------------------------------------------------------------------|----------------------------------------------------------------------------------------------------------------------------------------------------------------------------------------------------------------------------------------------------------------------------------------------|-------------------------------------------------------------------------------------------------|
| COVID-19 Trial, Investigating Outpatients Nationwide Study NCT04332107 Industry Foundation/non-profit professional organization Some concerns | 21<br>B.1.1.7 (alpha): NR<br>B.1.617.2 (delta): NR                      | CoV-2 infection: NR<br>Presence and/or duration of symptoms: Participants were not required to be symptomatic<br>Disease severity: NR<br>Pregnant women: Not eligible | G2: 92 placebo                                                                                                                                                      | female (%):<br>G1: 69<br>G2: 62<br><br>Ethnicity (%):<br>Non-white:<br>G1: 41<br>G2: 36<br><br>Diagnostic tool:<br>RT-PCR or antigen                              | Duration of symptoms: median (IQR)<br>G1: 3 (2-4.5)<br>G2: 3 (2-4)<br><br>Proportion of participants with previous infections:<br>NR<br><br>Time (days) since previous infection:<br>NR<br><br>Proportion of vaccinated participants:<br>NR<br><br>Disease severity (%):<br>NR<br><br>Currently pregnant (%):<br>NA | CI 0.76 to 1.39)<br><br>Symptom duration (time until symptom free):<br>NR<br><br>All-cause mortality:<br>At 21 days:<br>G1: 0/171 (0)<br>G2: 0/92 (0)<br><br>COVID-19 specific mortality:<br>NR<br><br>Hospitalization due to COVID:<br>At 21 days:<br>G1: 5/125 (4)<br>G2: 0/72 (0)<br>p=NR | Serious AE:<br>At 21 days:<br>G1: 0/171 (0)<br>G2: 0/92 (0)                                     |
| Chloroquine/Hydroxychloroquine                                                                                                                |                                                                         |                                                                                                                                                                       |                                                                                                                                                                     |                                                                                                                                                                   |                                                                                                                                                                                                                                                                                                                     |                                                                                                                                                                                                                                                                                              |                                                                                                 |
| Omrani et al. 2020 (28) Q-PROTECT NCT04349592 Government Some concerns                                                                        | RCT (double-blinded), Qatar 21<br>B.1.1.7 (alpha): NR                   | COVID-19 vaccine received: vaccine not available at study time<br>Previous SARS-CoV-2 infection: NA<br>Presence and/or duration of symptoms: NR                       | N=456<br>G1: 152 Hydrochloroquine 600 mg oral /azithromycin 500 mg on day 1, 250 mg from day 2<br>G2: 152 Hydroxychloroquine 600 mg oral+placebo<br>G3: 152 Placebo | Age, years, mean (SD):<br>G1: median 42<br>G2: median 40<br>G3: median 41<br><br>female (%):<br>G1: 1<br>G2: 2<br>G3: 1<br><br>Ethnicity (%):<br>Non-white:<br>NR | Proportion of symptomatic participants (%):<br>NR<br><br>Duration of symptoms:<br>NR<br><br>Proportion of participants with previous infections:<br>NA<br><br>Time (days) since previous infection:<br>NR                                                                                                           | Recovery <sup>†</sup> :<br>NR<br><br>Symptom duration (time until symptom free):<br>NR<br><br>All-cause mortality:<br>At 21 days:<br>G1: 0/152(0)<br>G2: 0/152(0)<br>G3: 0/152(0)<br><br>COVID-19 specific                                                                                   | Any AE:<br>NR<br><br>Serious AE:<br>At 21 days:<br>G1: 0/152(0)<br>G2: 0/152(0)<br>G3: 0/152(0) |

| Author, Year, Trial Name, Trial Registry No. Funding Risk of bias                                                                             | Design, Country, Duration (days) Dominant variant at time of study (%)*                       | Eligibility criteria                                                                                                                                                                                                                   | N total (randomized), Interventions, N group                                                              | Population                                                                                                                                                                                              | Baseline characteristics                                                                                                                                                                                                                                                                                                                                                | Recovery, symptom duration, all-cause mortality, COVID-19 specific mortality, Hospitalization due to COVID-19 (n/N (%))                                                                                                                                                                                                              | Incidence of any adverse events, incidence of serious adverse events (n/N (%))                                                   |
|-----------------------------------------------------------------------------------------------------------------------------------------------|-----------------------------------------------------------------------------------------------|----------------------------------------------------------------------------------------------------------------------------------------------------------------------------------------------------------------------------------------|-----------------------------------------------------------------------------------------------------------|---------------------------------------------------------------------------------------------------------------------------------------------------------------------------------------------------------|-------------------------------------------------------------------------------------------------------------------------------------------------------------------------------------------------------------------------------------------------------------------------------------------------------------------------------------------------------------------------|--------------------------------------------------------------------------------------------------------------------------------------------------------------------------------------------------------------------------------------------------------------------------------------------------------------------------------------|----------------------------------------------------------------------------------------------------------------------------------|
|                                                                                                                                               |                                                                                               | Disease severity: mild or no symptoms<br><br>Pregnant women: Not eligible                                                                                                                                                              |                                                                                                           | Diagnostic tool: RT-PCR                                                                                                                                                                                 | Proportion of vaccinated participants: NA<br><br>Disease severity (%): NR<br><br>Currently pregnant (%): NA                                                                                                                                                                                                                                                             | mortality:<br>At 21 days:<br>G1: 0/152(0)<br>G2: 0/152(0)<br>G3: 0/152(0)<br><br>Hospitalization due to COVID:<br>At 21 days:<br>G1: 4/152 (3)<br>G2: 3/152 (2)<br>G3: 4/152 (3)<br>p=1.00                                                                                                                                           |                                                                                                                                  |
| Reis et al. 2021 (30)<br><br>TOGETHER<br><br>NCT04403100<br><br>Academic Foundation/non-profit professional organization<br><br>Some concerns | RCT (double-blinded),<br><br>Brazil<br><br>90<br><br>P.1 (gamma): NR<br>B.1.617.2 (delta): NR | COVID-19 vaccine received: NR<br><br>Previous SARS-CoV-2 infection: NR<br><br>Presence and/or duration of symptoms: less than 8 days since onset of flulike symptoms<br><br>Disease severity: mild<br><br>Pregnant women: Not eligible | N=441<br><br>G1: 214<br>Hydroxychloroquine<br>800 mg at day 1,400 mg from day 2<br><br>G2: 227<br>Placebo | Age, years, mean (SD): median (range)<br>G1: 53 (18-81)<br>G2: 53 (18-80)<br><br>female (%):<br>G1: 57<br>G2: 53<br><br>Ethnicity (%):<br>Non-white:<br>G1: 98<br>G2: 96<br><br>Diagnostic tool: RT-PCR | Proportion of symptomatic participants (%):<br>G1: 100<br>G2: 100<br><br>Duration of symptoms:<br>NR<br><br>Proportion of participants with previous infections:<br>NR<br><br>Time (days) since previous infection:<br>NR<br><br>Proportion of vaccinated participants:<br>NR<br><br>Disease severity (%):<br>Mild<br>G1: 100<br>G2: 100<br><br>Currently pregnant (%): | Recovery <sup>†</sup> :<br>NR<br><br>Symptom duration (time until symptom free):<br>NR<br><br>All-cause mortality:<br>At 90 days:<br>G1: 0/214 (0)<br>G2: 1/227 (0.4)<br><br>COVID-19 specific mortality:<br>NR<br><br>Hospitalization due to COVID:<br>At 90 days<br>G1: 8/214 (4)<br>G2: 11/227 (5)<br>HR (95%CI) 0.76 (0.30-1.88) | Any AE:<br>At 90 days<br>G1: 46/207 (22)<br>G2: 46/220 (21)<br><br>Serious AE:<br>At 90 days<br>G1: 11/207 (5)<br>G2: 12/220 (6) |

| Author, Year, Trial Name, Trial Registry No. Funding Risk of bias                                                                  | Design, Country, Duration (days) Dominant variant at time of study (%)*                           | Eligibility criteria                                                                                                                                                                                                                  | N total (randomized), Interventions, N group                                                       | Population                                                                                                                                                                      | Baseline characteristics                                                                                                                                                                                                                                                                                                                                                                | Recovery, symptom duration, all-cause mortality, COVID-19 specific mortality, Hospitalization due to COVID-19 (n/N (%))                                                                                                                                                                                                                                                                                                                         | Incidence of any adverse events, incidence of serious adverse events (n/N (%))           |
|------------------------------------------------------------------------------------------------------------------------------------|---------------------------------------------------------------------------------------------------|---------------------------------------------------------------------------------------------------------------------------------------------------------------------------------------------------------------------------------------|----------------------------------------------------------------------------------------------------|---------------------------------------------------------------------------------------------------------------------------------------------------------------------------------|-----------------------------------------------------------------------------------------------------------------------------------------------------------------------------------------------------------------------------------------------------------------------------------------------------------------------------------------------------------------------------------------|-------------------------------------------------------------------------------------------------------------------------------------------------------------------------------------------------------------------------------------------------------------------------------------------------------------------------------------------------------------------------------------------------------------------------------------------------|------------------------------------------------------------------------------------------|
|                                                                                                                                    |                                                                                                   |                                                                                                                                                                                                                                       |                                                                                                    |                                                                                                                                                                                 | NA                                                                                                                                                                                                                                                                                                                                                                                      |                                                                                                                                                                                                                                                                                                                                                                                                                                                 |                                                                                          |
| Schwartz et al. 2021 (27)<br><br>ALBERTA HOPE COVID-19<br><br>NCT04329611<br><br>Government Industry Academic<br><br>Some concerns | RCT (double-blinded),<br><br>Canada<br><br>30<br><br>B.1.1.7 (alpha): NR<br>B.1.617.2 (delta): NR | COVID-19 vaccine received Vaccination: NR<br><br>Previous SARS-CoV-2 infection: NR<br><br>Presence and/or duration of symptoms: symptom onset within previous 12 days<br><br>Disease severity: NR<br><br>Pregnant women: Not eligible | N=148<br><br>G1: 111<br>Hydroxychloroquine 800 mg oral on day 1, 400 mg after<br>G2: 37<br>placebo | Age, years, mean (SD):<br>G1: 46.7<br>G2: 46.9<br><br>female (%):<br>G1: 41<br>G2: 54<br><br>Ethnicity:<br>Non-white (%):<br>G1: 68<br>G2: 58<br><br>Diagnostic tool:<br>RT-PCR | Proportion of symptomatic participants (%):<br>G1: 100<br>G2: 100<br><br>Duration of symptoms: mean (95% CI)<br>G1: 14 (10-20)<br>G2: 12 (7-18)<br><br>Proportion of participants with previous infections:<br>NR<br><br>Time (days) since infection:<br>NR<br><br>Proportion of vaccinated participants:<br>NR<br><br>Disease severity (%):<br>NR<br><br>Currently pregnant (%):<br>NA | Recovery <sup>†</sup> :<br>At 30 days:<br>G1: 67/110 (61)<br>G2: 29/37 (78)<br><br>Symptom duration (time until symptom free): median (95% CI)<br>G1: 14 (10-20)<br>G2: 12 (7-18)<br>p=0.3<br><br>All-cause mortality:<br>At 30 days:<br>G1: 0/111 (0)<br>G2: 0/37 (0)<br><br>COVID-19 specific mortality:<br>At 30 days:<br>G1: 0/111 (0)<br>G2: 0/37 (0)<br><br>Hospitalization due to COVID:<br>At 30 days:<br>G1: 4/110 (4)<br>G2: 0/37 (0) | Any AE:<br>NR<br><br>Serious AE:<br>At 30 days:<br>G1: 3/91 (3)<br>G2: 0/33 (0)<br>p=0.6 |
| Ivermectin                                                                                                                         |                                                                                                   |                                                                                                                                                                                                                                       |                                                                                                    |                                                                                                                                                                                 |                                                                                                                                                                                                                                                                                                                                                                                         |                                                                                                                                                                                                                                                                                                                                                                                                                                                 |                                                                                          |



| Author, Year, Trial Name, Trial Registry No. Funding Risk of bias                                                                                 | Design, Country, Duration (days) Dominant variant at time of study (%)*                                         | Eligibility criteria                                                                                                                                                                 | N total (randomized), Interventions, N group                                                      | Population                                                                                                                                                                                                              | Baseline characteristics                                                                                                                                                                                                                                                                                                                                                                                                                                                                                                                                                                          | Recovery, symptom duration, all-cause mortality, COVID-19 specific mortality, Hospitalization due to COVID-19 (n/N (%))                                                                                                                                                                                                                                                                                                                                                                                                                                                                                     | Incidence of any adverse events, incidence of serious adverse events (n/N (%))                               |
|---------------------------------------------------------------------------------------------------------------------------------------------------|-----------------------------------------------------------------------------------------------------------------|--------------------------------------------------------------------------------------------------------------------------------------------------------------------------------------|---------------------------------------------------------------------------------------------------|-------------------------------------------------------------------------------------------------------------------------------------------------------------------------------------------------------------------------|---------------------------------------------------------------------------------------------------------------------------------------------------------------------------------------------------------------------------------------------------------------------------------------------------------------------------------------------------------------------------------------------------------------------------------------------------------------------------------------------------------------------------------------------------------------------------------------------------|-------------------------------------------------------------------------------------------------------------------------------------------------------------------------------------------------------------------------------------------------------------------------------------------------------------------------------------------------------------------------------------------------------------------------------------------------------------------------------------------------------------------------------------------------------------------------------------------------------------|--------------------------------------------------------------------------------------------------------------|
| Buonfrate et al. 2022 (48)<br>COVER Study<br>NCT04438850<br>Industry<br>Academic<br>Foundation/non-profit<br>professional<br>organization<br>High | RCT (double-blinded),<br>Italy<br>30<br>B.1.1.7 (alpha): NR<br>B.1.617.2 (delta): NR<br>B.1.1.529 (omicron): NR | COVID-19 vaccine received: NR<br>Previous SARS-CoV-2 infection: NR<br>Presence and/or duration of symptoms: NR<br>Disease severity: mild to moderate<br>Pregnant women: Not eligible | N=93<br>G1: 29 Ivermectin 600mg/kg plus placebo<br>G2: 32 Ivermectin 1200 mg/kg<br>G3: 32 placebo | Age, years, median (IQR)<br>G1: 47.0 (31.0-62.0)<br>G2: 44.5 (31.0-55.5)<br>G3: 50.0 (26.0-57.0)<br><br>female (%):<br>G1: 48<br>G2: 25<br>G3: 53<br><br>Ethnicity (%):<br>Non-white: NR<br><br>Diagnostic tool: RT-PCR | Proportion of symptomatic participants (%):<br>G1: 83<br>G2: 91<br>G3: 84<br><br>Duration of symptoms: Median (IQR)<br>G1: 4.0 (3.0-5.0)<br>G2: 4.0 (3.0-6.0)<br>G3: 4.0 (2.0-6.0)<br><br>Proportion of participants with previous infections: NR<br><br>Time (days) since previous infection: NR<br><br>Proportion of vaccinated participants:<br>G1: 3<br>G2: 0<br>G3: 3<br><br>Disease severity (%):<br>COVID-19 severity score (%)<br>no limitation of activities:<br>G1: 83<br>G2: 84<br>G3: 84<br>limitation of activities:<br>G1: 17<br>G2: 16<br>G3: 16<br><br>Currently pregnant (%): NA | Recovery <sup>†</sup> :<br>At 30 days:<br>G1: 19/24 (79)<br>G2: 21/29 (72)<br>G3: 21/27 (78)<br>p=NR<br><br>Symptom duration (time until symptom free) (median (IQR)):<br>At 30 days:<br>G1: 29.0 (13.5-32)<br>G2: 14.0 (7-37)<br>G3: 14.0 (13-30)<br><br>All-cause mortality <sup>***</sup> :<br>At 30 days:<br>G1: 0/24 (0)<br>G2: 0/29 (0)<br>G3: 0/27(0)<br><br>COVID-19 specific mortality <sup>***</sup> :<br>At 30 days:<br>G1: 0/24 (0)<br>G2: 0/29 (0)<br>G3: 0/27 (0)<br><br>Hospitalization due to COVID:<br>At 30 days <sup>***</sup><br>G1: 1/29 (3)<br>G2: 3/30 (10)<br>G3: 0/30 (10)<br>p=NR | Any AE: NR<br><br>Serious AE: At 30 days <sup>***</sup> :<br>G1: 1 (4)<br>G2: 3 (10)<br>G3: 0/30 (0)<br>p=NR |

| Author, Year, Trial Name, Trial Registry No. Funding Risk of bias                                                  | Design, Country, Duration (days) Dominant variant at time of study (%)*                          | Eligibility criteria                                                                                                                                                                                                                                   | N total (randomized), Interventions, N group                                      | Population                                                                                                                                                                              | Baseline characteristics                                                                                                                                                                                                                                                                                                                                                                               | Recovery, symptom duration, all-cause mortality, COVID-19 specific mortality, Hospitalization due to COVID-19 (n/N (%))                                                                                                                                                                              | Incidence of any adverse events, incidence of serious adverse events (n/N (%))                                 |
|--------------------------------------------------------------------------------------------------------------------|--------------------------------------------------------------------------------------------------|--------------------------------------------------------------------------------------------------------------------------------------------------------------------------------------------------------------------------------------------------------|-----------------------------------------------------------------------------------|-----------------------------------------------------------------------------------------------------------------------------------------------------------------------------------------|--------------------------------------------------------------------------------------------------------------------------------------------------------------------------------------------------------------------------------------------------------------------------------------------------------------------------------------------------------------------------------------------------------|------------------------------------------------------------------------------------------------------------------------------------------------------------------------------------------------------------------------------------------------------------------------------------------------------|----------------------------------------------------------------------------------------------------------------|
| Chaccour et al. 2021 (29)<br><br>none<br><br>NCT04390022<br><br>Academic<br><br>Some concerns                      | RCT (double-blinded),<br><br>Spain<br><br>28<br><br>B.1.1.7 (alpha): NR<br>B.1.617.2 (delta): NR | COVID-19 vaccine received: NR<br><br>Previous SARS-CoV-2 infection: NR<br><br>Presence and/or duration of symptoms: symptoms for no more than 72 hours before enrolment.<br><br>Disease severity: mild to moderate<br><br>Pregnant women: Not eligible | N=24<br><br>G1: 12<br>Ivermectin 400 mcg/kg body weight oral<br>G2: 12<br>placebo | Age, years, mean (SD):<br>Median (IQR)<br>G1: 26 (19-36)<br>G2: 26 (21-44)<br><br>female (%):<br>G1: 42<br>G2: 58<br><br>Ethnicity (%):<br>Non-white: NR<br><br>Diagnostic tool: RT-PCR | Proportion of symptomatic participants (%):<br>G1: 100<br>G2: 100<br><br>Duration of symptoms: median (IQR) hours<br>G1: 24 (24-48)<br>G2: 48 (36-48)<br><br>Proportion of participants with previous infections:<br>G1: 0<br>G2: 0<br><br>Time (days) since previous infection: NR<br><br>Proportion of vaccinated participants: NR<br><br>Disease severity (%): NR<br><br>Currently pregnant (%): NA | Recovery <sup>†</sup> : NR<br><br>Symptom duration (time until symptom free): NR<br><br>All-cause mortality: At 28 days: G1: 0/12 (0)<br>G2: 0/12 (0)<br><br>COVID-19 specific mortality: At 28 days: G1: 0/12 (0)<br>G2: 0/12 (0)<br><br>Hospitalization due to COVID: G1: 0/12 (0)<br>G2: 0/12 (0) | Any AE: At 28 days: G1: 5/12 (42)<br>G2: 5/12 (42)<br><br>Serious AE: At 28 days: G1: 0/12 (0)<br>G2: 0/12 (0) |
| López-Medina et al. 2021 (26)<br><br>(EPIC Trial) (EPIC)<br><br>NCT04405843<br><br>Government<br><br>Some concerns | RCT (double-blinded),<br><br>Colombia<br><br>21<br><br>B.1.621 (mu): NR<br>P.1 (gamma): NR       | COVID-19 vaccine received: NR<br><br>Previous SARS-CoV-2 infection: NR<br><br>Presence and/or duration of symptoms:                                                                                                                                    | N=476<br><br>G1: 238<br>Ivermectin 300 mcg/kg body weight<br>G2: 238<br>placebo   | Age, years, mean (SD):<br>Median (IQR)<br>G1: 37 (29.0-47.7)<br>G2: 37 (28.7-49.2)<br><br>female (%):<br>G1: 61<br>G2: 55<br><br>Ethnicity (%):<br>Non-white:                           | Proportion of symptomatic participants (%):<br>G1: 100<br>G2: 100<br><br>Duration of symptoms: median (IQR)<br>G1: 5 (4-6)<br>G2: 5 (4-6)<br><br>Proportion of participants with previous                                                                                                                                                                                                              | Recovery <sup>†</sup> : At 21 days: G1: 164/200 (82)<br>G2: 156/198 (79)<br>p=NR<br><br>Symptom duration (time until symptom free) (median(IQR)): At 21 days: G1: 10 (9-13)                                                                                                                          | Any AE: NR<br><br>Serious AE: At 21 days: G1: 2/200 (1)<br>G2: 2/198 (1)<br>p=NR                               |

| Author, Year, Trial Name, Trial Registry No. Funding Risk of bias                                                                            | Design, Country, Duration (days) Dominant variant at time of study (%)*                                  | Eligibility criteria                                                                                                                                                                                              | N total (randomized), Interventions, N group                                                              | Population                                                                                                                                                                                                       | Baseline characteristics                                                                                                                                                                                                                                                                                                                                 | Recovery, symptom duration, all-cause mortality, COVID-19 specific mortality, Hospitalization due to COVID-19 (n/N (%))                                                                                                                                                                            | Incidence of any adverse events, incidence of serious adverse events (n/N (%))                                          |
|----------------------------------------------------------------------------------------------------------------------------------------------|----------------------------------------------------------------------------------------------------------|-------------------------------------------------------------------------------------------------------------------------------------------------------------------------------------------------------------------|-----------------------------------------------------------------------------------------------------------|------------------------------------------------------------------------------------------------------------------------------------------------------------------------------------------------------------------|----------------------------------------------------------------------------------------------------------------------------------------------------------------------------------------------------------------------------------------------------------------------------------------------------------------------------------------------------------|----------------------------------------------------------------------------------------------------------------------------------------------------------------------------------------------------------------------------------------------------------------------------------------------------|-------------------------------------------------------------------------------------------------------------------------|
|                                                                                                                                              |                                                                                                          | <p>within the last 7 days before randomisation</p> <p>Disease severity: mild</p> <p>Pregnant women: Not eligible</p>                                                                                              |                                                                                                           | <p>NR</p> <p>Diagnostic tool: RT-PCR or antigen</p>                                                                                                                                                              | <p>infections: NR</p> <p>Time (days) since previous infection: NR</p> <p>Proportion of vaccinated participants: NR</p> <p>Disease severity (%): Mild: G1: 100 G2: 100</p> <p>Currently pregnant (%): NA</p>                                                                                                                                              | <p>G2: 12 (9-13)</p> <p>All-cause mortality: At 21 days: G1: 0/200 (0) G2: 1/198 (1)</p> <p>COVID-19 specific mortality: NR</p> <p>Hospitalization due to COVID: NR</p>                                                                                                                            |                                                                                                                         |
| <p>Reis et al., 2022 (49)</p> <p>TOGETHER</p> <p>NCT04727424</p> <p>Foundation/non-profit professional organization</p> <p>Some concerns</p> | <p>RCT (double-blinded),</p> <p>Brazil</p> <p>28</p> <p>P.1 (gamma): NR</p> <p>B.1.617.2 (delta): NR</p> | <p>COVID-19 vaccine received: Eligible</p> <p>Previous SARS-CoV-2 infection: NR</p> <p>Presence and/or duration of symptoms: less than 7 days</p> <p>Disease severity: NR</p> <p>Pregnant women: Not eligible</p> | <p>N=1,358</p> <p>G1: 679</p> <p>Ivermectin 400 mcg/kg body weight oral</p> <p>G2: 679</p> <p>placebo</p> | <p>Age, years, mean (SD): Median (IQR)</p> <p>G1: 49 (39–57)</p> <p>G2: 49 (37–56)</p> <p>female (%): G1: 56 G2: 60</p> <p>Ethnicity (%): Non-white: G1: 99 G2: 99</p> <p>Diagnostic tool: RT-PCR or antigen</p> | <p>Proportion of symptomatic participants (%): G1: 100 G2: 100</p> <p>Duration of symptoms: 0–3 days: n (%) G1: 302 (44.5) G2: 295 (43.4) 4–7 days: n (%) G1: 377 (55.5) G2: 384 (56.6)</p> <p>Proportion of participants with previous infections: NR</p> <p>Time (days) since previous infection: NR</p> <p>Proportion of vaccinated participants:</p> | <p>Recovery: NR</p> <p>Symptom duration (time until symptom free) (median(IQR)): At 28 days: G1: 14 (11 to 14) G2: 14 (11 to 14)</p> <p>All-cause mortality: At 28 days: G1: 21/679 (3) G2: 24/679 (4)</p> <p>COVID-19 specific mortality: NR</p> <p>Hospitalization due to COVID: At 28 days:</p> | <p>Any AE: At 28 days G1: 123/679 (18) G2: 156/679 (23)</p> <p>Serious AE: At 28 days G1: 17/679 (3) G2: 18/679 (3)</p> |

| Author, Year, Trial Name, Trial Registry No. Funding Risk of bias                          | Design, Country, Duration (days) Dominant variant at time of study (%)*          | Eligibility criteria                                                                                                                                                                 | N total (randomized), Interventions, N group            | Population                                                                                                                                                | Baseline characteristics                                                                                                                                                                                                                                                                                                                            | Recovery, symptom duration, all-cause mortality, COVID-19 specific mortality, Hospitalization due to COVID-19 (n/N (%))                                                                                                                                                                               | Incidence of any adverse events, incidence of serious adverse events (n/N (%)) |
|--------------------------------------------------------------------------------------------|----------------------------------------------------------------------------------|--------------------------------------------------------------------------------------------------------------------------------------------------------------------------------------|---------------------------------------------------------|-----------------------------------------------------------------------------------------------------------------------------------------------------------|-----------------------------------------------------------------------------------------------------------------------------------------------------------------------------------------------------------------------------------------------------------------------------------------------------------------------------------------------------|-------------------------------------------------------------------------------------------------------------------------------------------------------------------------------------------------------------------------------------------------------------------------------------------------------|--------------------------------------------------------------------------------|
|                                                                                            |                                                                                  |                                                                                                                                                                                      |                                                         |                                                                                                                                                           | NR<br>Disease severity (%):<br>NR<br>Currently pregnant (%):<br>NA                                                                                                                                                                                                                                                                                  | G1: 78/679 (12)<br>G2: 93/679 (14)                                                                                                                                                                                                                                                                    |                                                                                |
| Vallejos et al. 2021 (47)<br>IVER-COR COVID19<br>NCT04529525<br>Government Academic<br>Low | RCT (double-blinded),<br>Argentina<br>30<br>P.1 (gamma): NR<br>C.37 (lambda): NR | COVID-19 vaccine received: NR<br>Previous SARS-CoV-2 infection: NR<br>Presence and/or duration of symptoms: NR<br>Disease severity: mild to moderate<br>Pregnant women: Not eligible | N=501<br>G1: 250 Ivermectin 24-48 mg<br>G2: 251 Placebo | Age, years, mean (SD):<br>G1: 42.58 (15.29)<br>G2: 42.40 (15.75)<br>female (%):<br>G1: 44<br>G2: 50<br>Ethnicity (%):<br>NR<br>Diagnostic tool:<br>RT-PCR | Proportion of symptomatic participants (%):<br>G1: 96<br>G2: 96<br>Duration of symptoms:<br>G1: 4 (3-5)<br>G2: 4 (3-6)<br>Proportion of participants with previous infections:<br>NR<br>Time (days) since previous infection:<br>NR<br>Proportion of vaccinated participants:<br>NR<br>Disease severity (%):<br>NR<br>Currently pregnant (%):<br>NA | Recovery <sup>†</sup> :<br>NR<br>Symptom duration (time until symptom free):<br>NR<br>All-cause mortality:<br>At 30 days:<br>G1: 4/250 (2)<br>G2: 3/251 (1)<br>p=NR<br>COVID-19 specific mortality:<br>NR<br>Hospitalization due to COVID:<br>At 30 days:<br>G1: 14/250 (6)<br>G2: 21/251 (8)<br>p=NR | Any AE:<br>NR<br>Serious AE:<br>NR                                             |
| Nitazoxanide                                                                               |                                                                                  |                                                                                                                                                                                      |                                                         |                                                                                                                                                           |                                                                                                                                                                                                                                                                                                                                                     |                                                                                                                                                                                                                                                                                                       |                                                                                |
| Rocco et al. 2021 (32)                                                                     | RCT (double-blinded),                                                            | COVID-19 vaccine received: NR                                                                                                                                                        | N=475<br>G1: 238 Nitazoxanide 500 mg oral               | Age, years, (%):<br>18–39 years<br>G1: 59<br>G2: 57                                                                                                       | Proportion of symptomatic participants (%):<br>G1: 100<br>G2: 100                                                                                                                                                                                                                                                                                   | Recovery <sup>†</sup> :<br>At 5 days:<br>G1: 135/194 (70)<br>G2: 146/198 (74)                                                                                                                                                                                                                         | Any AE:<br>At 5 days<br>G1: 60/238 (25)<br>G2: 60/237 (25)                     |

| Author, Year, Trial Name, Trial Registry No. Funding Risk of bias                  | Design, Country, Duration (days) Dominant variant at time of study (%)*                             | Eligibility criteria                                                                                                                                                                                 | N total (randomized), Interventions, N group                             | Population                                                                                                                                                                                       | Baseline characteristics                                                                                                                                                                                                                                                                                                                     | Recovery, symptom duration, all-cause mortality, COVID-19 specific mortality, Hospitalization due to COVID-19 (n/N (%))                                                                                                                                                           | Incidence of any adverse events, incidence of serious adverse events (n/N (%))                                                                     |
|------------------------------------------------------------------------------------|-----------------------------------------------------------------------------------------------------|------------------------------------------------------------------------------------------------------------------------------------------------------------------------------------------------------|--------------------------------------------------------------------------|--------------------------------------------------------------------------------------------------------------------------------------------------------------------------------------------------|----------------------------------------------------------------------------------------------------------------------------------------------------------------------------------------------------------------------------------------------------------------------------------------------------------------------------------------------|-----------------------------------------------------------------------------------------------------------------------------------------------------------------------------------------------------------------------------------------------------------------------------------|----------------------------------------------------------------------------------------------------------------------------------------------------|
| NCT04552483<br><br>Government Academic<br><br>Some concerns                        | Brazil<br><br>14<br><br>P.1 (gamma): NR<br>B.1.617.2 (delta): NR                                    | Previous SARS-CoV-2 infection: NR<br><br>Presence and/or duration of symptoms: clinical symptoms of COVID-19 no longer than 3 days<br><br>Disease severity: mild<br><br>Pregnant women: Not eligible | G2: 237<br>Placebo                                                       | 40–59 years<br>G1: 35<br>G2: 37<br>60–77 years<br>G1: 6<br>G2: 6<br><br>female (%):<br>G1: 48<br>G2: 58<br><br>Ethnicity (%):<br>Non-White<br>G1: 32<br>G2: 30<br><br>Diagnostic tool:<br>RT-PCR | Duration of symptoms (median [IQR]):<br>G1: 5 (4-5)<br>G2: 5 (4-5)<br><br>Proportion of participants with previous infections:<br>NR<br><br>Time (days) since previous infection:<br>NR<br><br>Proportion of vaccinated participants:<br>NR<br><br>Disease severity (%):<br>Mild:<br>G1: 100<br>G2: 100<br><br>Currently pregnant (%):<br>NA | p=NR<br><br>Symptom duration (time until symptom free):<br>NR<br><br>All-cause mortality:<br>At 14 days:<br>G1: 0/238 (0)<br>G2: 0/237 (0)<br><br>COVID-19 specific mortality:<br>NR<br><br>Hospitalization due to COVID:<br>At 5 days:<br>G1: 5/238 (2)<br>G2: 5/237 (2)<br>p=NR | p=NR<br><br>Serious AE:<br>At 5 days<br>G1: 1/238 (0.4)<br>G2: 1/237 (0.4)                                                                         |
| Rossignol et al. 2022 (43)<br><br>NCT04486313<br><br>Industry<br><br>Some concerns | RCT (double-blinded),<br><br>U.S.<br><br>28<br><br>B.1.617.2 (delta): NR<br>B.1.1.529 (omicron): NR | COVID-19 vaccine received not eligible if received within 30 days prior to screening<br><br>Previous SARS-CoV-2 infection: not eligible<br><br>Presence and/or duration of symptoms: at least two    | N=1,092<br><br>G1: 628<br>Nitazoxanide 1200 mg<br><br>G2: 464<br>Placebo | Age, years, median (IQR):<br>Overall: 40 (12–83)<br>G1: 38 (12–83)<br>G2: 42 (13–81)<br><br>female (%):<br>G1: 55<br>G2: 58<br><br>Ethnicity (%):<br>Non-White<br>G1: 36<br>G2: 41               | Proportion of symptomatic participants (%):<br>G1: 100<br>G2: 100<br><br>Duration of symptoms: Hours<br>G1: 43.9<br>G2: 46.5<br><br>Proportion of participants with previous infections:<br>NR<br><br>Time (days) since previous infection:                                                                                                  | Recovery <sup>†</sup> :<br>NR<br><br>Symptom duration (time until symptom free):<br>Median (IQR) TSR (days)<br>G1: 13.3 (6.3, >21)<br>G2: 12.4 (7.2, >21)<br>p=0.88<br><br>All-cause mortality:<br>At 28 days:<br>G1: 2/472 (0.4)<br>G2: 0/463 (0)<br>p=NR                        | Any AE:<br>At 28 days:<br>G1: 63/472 (13)<br>G2: 75/463 (16)<br>p=NR<br><br>Serious AE:<br>At 28 days:<br>G1: 2/472 (0.4)<br>G2: 7/463 (2)<br>p=NR |

| Author, Year, Trial Name, Trial Registry No. Funding Risk of bias                                                                                          | Design, Country, Duration (days) Dominant variant at time of study (%)*              | Eligibility criteria                                                                                                                                                                                                                                     | N total (randomized), Interventions, N group                                    | Population                                                                                                                                                                   | Baseline characteristics                                                                                                                                                                                                                                                                                                                       | Recovery, symptom duration, all-cause mortality, COVID-19 specific mortality, Hospitalization due to COVID-19 (n/N (%))                                                                                                                                                                                                                         | Incidence of any adverse events, incidence of serious adverse events (n/N (%))                                                                 |
|------------------------------------------------------------------------------------------------------------------------------------------------------------|--------------------------------------------------------------------------------------|----------------------------------------------------------------------------------------------------------------------------------------------------------------------------------------------------------------------------------------------------------|---------------------------------------------------------------------------------|------------------------------------------------------------------------------------------------------------------------------------------------------------------------------|------------------------------------------------------------------------------------------------------------------------------------------------------------------------------------------------------------------------------------------------------------------------------------------------------------------------------------------------|-------------------------------------------------------------------------------------------------------------------------------------------------------------------------------------------------------------------------------------------------------------------------------------------------------------------------------------------------|------------------------------------------------------------------------------------------------------------------------------------------------|
|                                                                                                                                                            |                                                                                      | respiratory symptom domains related to Covid-19 within 72 hours<br><br>Disease severity: mild to moderate<br><br>Pregnant women: Not eligible                                                                                                            |                                                                                 | Diagnostic tool: RT-PCR                                                                                                                                                      | NR<br><br>Proportion of vaccinated participants: NR<br><br>Disease severity (%):<br>Moderate:<br>G1: 37<br>G2: 33<br><br>Currently pregnant (%):<br>NA                                                                                                                                                                                         | COVID-19 specific mortality:<br>At 28 days:<br>G1: 1/472 (0.2)<br>G2: 0/463 (0)<br>p=NR<br><br>Hospitalization due to COVID:<br>At 28 days:<br>G1: 1/472 (0.2)<br>G2: 3/463 (1)<br>p=NR                                                                                                                                                         |                                                                                                                                                |
| <b>Convalescent plasma</b>                                                                                                                                 |                                                                                      |                                                                                                                                                                                                                                                          |                                                                                 |                                                                                                                                                                              |                                                                                                                                                                                                                                                                                                                                                |                                                                                                                                                                                                                                                                                                                                                 |                                                                                                                                                |
| Aleman et al. 2022 (37)<br><br>CONV-ERT<br><br>NCT04621123<br><br>Industry<br>Academic<br>Foundation/non-profit<br>professional<br>organization<br><br>Low | RCT (double-blinded)<br><br>Spain<br><br>28<br><br>B.1.1.7 (alpha): NR<br>B1.177: NR | COVID-19 vaccine received: Not eligible<br><br>Previous SARS-CoV-2 infection: Not eligible<br><br>Presence and/or duration of symptoms: symptom onset no more than 7 days before randomisation<br><br>Disease severity: mild-to-moderate<br><br>Pregnant | N=376<br>G1: 188<br>Convalescent plasma 250–300 mL IV<br><br>G2: 188<br>Placebo | Age, years, median (IQR)<br>G1: 56 (52–62)<br>G2: 56 (53–63)<br><br>female (%):<br>G1: 44<br>G2: 48<br><br>Ethnicity (%):<br>NR<br><br>Diagnostic tool:<br>RT-PCR or antigen | Proportion of symptomatic participants (%):<br>G1: 100<br>G2: 100<br><br>Duration of symptoms:<br>G1: 4.4 (1.4)<br>G2: 4.4 (1.4)<br><br>Proportion of participants with previous infections<br>NA<br><br>Time (days) since previous infection:<br>NA<br><br>Proportion of vaccinated participants:<br>NA<br><br>Disease severity (%):<br>Mild: | Recovery <sup>†</sup> :<br>NR<br><br>Symptom duration (time until symptom free):<br>Days (Median (IQR))<br>G1: 12.0 (6.0–21.3)<br>G2: 12.0 (6.0–22.0)<br>HR 1.05 (95% CI 0.85 to 1.30)<br><br>All-cause mortality:<br>At 28 days:<br>G1: 0/188 (0)<br>G2: 2/188 (1)<br>RR 0.20 (95% CI, 0.01 to 4.14)<br><br>COVID-19 specific mortality:<br>NR | Any AE:<br>At 28 days:<br>G1: 24/188 (13)<br>G2: 8/188 (4)<br>p=NR<br><br>Serious AE:<br>At 28 days:<br>G1: 1/188 (1)<br>G2: 0/188 (0)<br>p=NR |

| Author, Year, Trial Name, Trial Registry No. Funding Risk of bias                                            | Design, Country, Duration (days) Dominant variant at time of study (%)*                        | Eligibility criteria                                                                                                                                                                                                                        | N total (randomized), Interventions, N group                                 | Population                                                                                                                                                                                    | Baseline characteristics                                                                                                                                                                                                                                                                                                                                                                                      | Recovery, symptom duration, all-cause mortality, COVID-19 specific mortality, Hospitalization due to COVID-19 (n/N (%))                                                                                                                                                                                               | Incidence of any adverse events, incidence of serious adverse events (n/N (%))            |
|--------------------------------------------------------------------------------------------------------------|------------------------------------------------------------------------------------------------|---------------------------------------------------------------------------------------------------------------------------------------------------------------------------------------------------------------------------------------------|------------------------------------------------------------------------------|-----------------------------------------------------------------------------------------------------------------------------------------------------------------------------------------------|---------------------------------------------------------------------------------------------------------------------------------------------------------------------------------------------------------------------------------------------------------------------------------------------------------------------------------------------------------------------------------------------------------------|-----------------------------------------------------------------------------------------------------------------------------------------------------------------------------------------------------------------------------------------------------------------------------------------------------------------------|-------------------------------------------------------------------------------------------|
|                                                                                                              |                                                                                                | women:<br>Not eligible                                                                                                                                                                                                                      |                                                                              |                                                                                                                                                                                               | G1: 97<br>G2: 97<br>Moderate:<br>G1: 3<br>G2: 3<br><br>Currently pregnant (%):<br>NA                                                                                                                                                                                                                                                                                                                          | Hospitalization due to COVID:<br>At 28 days:<br>G1: 22/188 (12)<br>G2: 21/188 (11)<br>p=0.76<br>RR 1.05 (95 CI, 0.78 to 1.41)                                                                                                                                                                                         |                                                                                           |
| Korley et al. 2021 (36)<br><br>SIREN-C3PO<br><br>NCT04355767<br><br>Government Academic<br><br>Some concerns | RCT (single-blinded)<br><br>U.S.<br><br>15<br><br>B.1.1.7 (alpha): NR<br>B.1.617.2 (delta): NR | COVID-19 vaccine received: not eligible<br><br>Previous SARS-CoV-2 infection: NR<br><br>Presence and/or duration of symptoms: onset of symptoms within 7 days before enrollment<br><br>Disease severity: NR<br><br>Pregnant women: Eligible | N=511<br><br>G1: 257<br>Convalescent plasma 250 ml<br><br>G2: 254<br>Placebo | Age, years, median (IQR)<br>G1: 54 (42–62)<br>G2: 54 (40–62)<br><br>female (%):<br>G1: 53<br>G2: 55<br><br>Ethnicity (%):<br>Non-white:<br>G1: 33<br>G2: 35<br><br>Diagnostic tool:<br>RT-PCR | Proportion of symptomatic participants (%):<br>NR<br><br>Duration of symptoms:<br>G1 (Median (IQR)): 4 (2–5)<br>G2 (Median (IQR)): 3 (2–5)<br><br>Proportion of participants with previous infections:<br>NR<br><br>Time (days) since previous infection:<br>NR<br><br>Proportion of vaccinated participants:<br>NA<br><br>Disease severity (%):<br>NR<br><br>Currently pregnant (%):<br>G1: 1.2%<br>G2: 1.2% | Recovery <sup>†</sup> :<br>NR<br><br>Symptom duration (time until symptom free):<br>NR<br><br>All-cause mortality:<br>At 30 days:<br>G1: 5/257 (2)<br>G2: 1/254 (0.4)<br>(risk difference (95% CI), -1.6 % point; -4.2 to 0.50);<br><br>COVID-19 specific mortality:<br>NR<br><br>Hospitalization due to COVID:<br>NR | Any AE:<br>NR<br><br>Serious AE:<br>At 30 days:<br>G1: 3/257 (1)<br>G2: 0/254 (0)<br>p=NR |
| Libster et al. 2021 (24)<br><br>NR                                                                           | RCT (double-blinded),                                                                          | COVID-19 vaccine received: NR                                                                                                                                                                                                               | N=160<br><br>G1: 80<br>Convalescent plasma 250 ml                            | Age, years, mean (SD):<br>G1: 76.4 (8.7)<br>G2: 77.9 (8.4)                                                                                                                                    | Proportion of symptomatic participants (%):<br>G1: 100<br>G2: 100                                                                                                                                                                                                                                                                                                                                             | Recovery <sup>†</sup> :<br>NR<br><br>Symptom duration (time                                                                                                                                                                                                                                                           | Any AE:<br>NR<br><br>Serious AE:                                                          |

| Author, Year, Trial Name, Trial Registry No. Funding Risk of bias                                                                                | Design, Country, Duration (days) Dominant variant at time of study (%)*                          | Eligibility criteria                                                                                                                                                                                         | N total (randomized), Interventions, N group                                  | Population                                                                                                                                                      | Baseline characteristics                                                                                                                                                                                                                                                                                          | Recovery, symptom duration, all-cause mortality, COVID-19 specific mortality, Hospitalization due to COVID-19 (n/N (%))                                                                                                             | Incidence of any adverse events, incidence of serious adverse events (n/N (%))                                                                                                                                               |
|--------------------------------------------------------------------------------------------------------------------------------------------------|--------------------------------------------------------------------------------------------------|--------------------------------------------------------------------------------------------------------------------------------------------------------------------------------------------------------------|-------------------------------------------------------------------------------|-----------------------------------------------------------------------------------------------------------------------------------------------------------------|-------------------------------------------------------------------------------------------------------------------------------------------------------------------------------------------------------------------------------------------------------------------------------------------------------------------|-------------------------------------------------------------------------------------------------------------------------------------------------------------------------------------------------------------------------------------|------------------------------------------------------------------------------------------------------------------------------------------------------------------------------------------------------------------------------|
| NCT04479163<br><br>Government Industry Foundation/non-profit professional organization<br><br>Some concerns                                      | Argentina<br><br>15<br><br>P.1 (gamma): NR<br>C.37 (lambda): NR                                  | Previous SARS-CoV-2 infection: NR<br><br>Presence and/or duration of symptoms at least one Covid-19 related symptom for less than 48 hours<br><br>Disease severity: mild<br><br>Pregnant women: Not eligible | G2: 80<br>Placebo                                                             | female (%):<br>G1: 68<br>G2: 58<br><br>Ethnicity (%):<br>NR<br><br>Diagnostic tool:<br>RT-PCR                                                                   | Duration of symptoms:<br>NR<br><br>Proportion of participants with previous infections:<br>NR<br><br>Time (days) since previous infection:<br>NR<br><br>Proportion of vaccinated participants:<br>G1: 0<br>G2: 0<br><br>Disease severity (%):<br>Mild:<br>G1: 100<br>G2: 100<br><br>Currently pregnant (%):<br>NA | until symptom free):<br>NR<br><br>All-cause mortality:<br>At 15 days:<br>G1: 2/80 (2)<br>G2: 4/80 (5)<br><br>COVID-19 specific mortality:<br>At 15 days:<br>G1: 2/80 (2)<br>G2: 4/80 (5)<br><br>Hospitalization due to COVID:<br>NR | At 15 days:<br>G1: 7/80 (9)<br>G2: 12/80 (15)<br>RR (95% CI): 0.58 (0.24–1.41)                                                                                                                                               |
| Sullivan et al. 2022 (46)<br><br>CSSC-004<br><br>NCT04373460<br><br>Government Industry Academic Foundation/non-profit professional organization | RCT (double-blinded),<br><br>U.S.,<br><br>28<br><br>B.1.1.7 (alpha): NR<br>B.1.617.2 (delta): NR | COVID-19 vaccine received: Eligible<br><br>Previous SARS-CoV-2 infection: NR<br><br>Presence and/or duration of symptoms: symptom onset within 8 days before transfusion                                     | N=1225<br><br>G1: 610<br>Convalescent plasma 250 ml<br><br>G2: 615<br>Placebo | Age, years, Median (IQR)<br>G1: 42 (32 - 54)<br>G2: 44 (33 - 55)<br><br>female (%):<br>G1: 55<br>G2: 60<br><br>Ethnicity (%):<br>Non-white:<br>G1: 22<br>G2: 19 | Proportion of symptomatic participants (%):<br>G1: 100<br>G2: 100<br><br>Duration of symptoms:<br>Median symptom duration before randomization (IQR) - days:<br>G1: 5 (4-7)<br>G2: 5 (4-7)<br><br>Proportion of participants with previous infections:<br>NR                                                      | Recovery <sup>†</sup> :<br>NR<br><br>Symptom duration (time until symptom free):<br>NR<br><br>All-cause mortality:<br>At 28 days:<br>G1: 0/592 (0)<br>G2: 3/589 (1)<br>p=NR<br><br>COVID-19 specific mortality:<br>NR               | Any AE:<br>At 28 days:<br>Overall: 89/1181 (8)<br>G1: 34/592 (6)<br>G2: 55/589 (9)<br>Rate difference (95% CI) 0.18 (0.03, 0.32)<br><br>Serious AE:<br>G1: 2/592 (0.3)<br>G2: 0/589 (0)<br>Rate difference (95% CI) -0.05 (- |



| Author, Year, Trial Name, Trial Registry No. Funding Risk of bias                                                                            | Design, Country, Duration (days) Dominant variant at time of study (%)*                    | Eligibility criteria                                                                                                                                       | N total (randomized), Interventions, N group                                                      | Population                                                                                                                                                   | Baseline characteristics                                                                                                                                                                                                                                                      | Recovery, symptom duration, all-cause mortality, COVID-19 specific mortality, Hospitalization due to COVID-19 (n/N (%))                                                                                                                | Incidence of any adverse events, incidence of serious adverse events (n/N (%))                                                   |
|----------------------------------------------------------------------------------------------------------------------------------------------|--------------------------------------------------------------------------------------------|------------------------------------------------------------------------------------------------------------------------------------------------------------|---------------------------------------------------------------------------------------------------|--------------------------------------------------------------------------------------------------------------------------------------------------------------|-------------------------------------------------------------------------------------------------------------------------------------------------------------------------------------------------------------------------------------------------------------------------------|----------------------------------------------------------------------------------------------------------------------------------------------------------------------------------------------------------------------------------------|----------------------------------------------------------------------------------------------------------------------------------|
| Low                                                                                                                                          |                                                                                            | Disease severity: NR<br><br>Pregnant women: Eligible                                                                                                       |                                                                                                   | Diagnostic tool: RT-PCR or antigen                                                                                                                           | Time (days) since previous infection: NR<br><br>Proportion of vaccinated participants:<br>Partially vaccinated (%):<br>G1: 5<br>G2: 5<br><br>Fully vaccinated (%):<br>G1: 12<br>G2: 13<br><br>Disease severity (%): NR<br><br>Currently pregnant (%):<br>G1: 0.3%<br>G2: 0.2% | At 28 days:<br>G1: 0/592 (0)<br>G2: 3/589 (1)<br>p=NR<br><br>Hospitalization due to COVID:<br>At 28 days:<br>G1: 17/592(3)<br>G2: 37/589 (6)<br>absolute risk reduction (95% CI), 3.4% points (1.0 to 5.8)                             | 0.11, 0.02)                                                                                                                      |
| <b>Other drugs</b>                                                                                                                           |                                                                                            |                                                                                                                                                            |                                                                                                   |                                                                                                                                                              |                                                                                                                                                                                                                                                                               |                                                                                                                                                                                                                                        |                                                                                                                                  |
| Corticosteroids                                                                                                                              |                                                                                            |                                                                                                                                                            |                                                                                                   |                                                                                                                                                              |                                                                                                                                                                                                                                                                               |                                                                                                                                                                                                                                        |                                                                                                                                  |
| Ezer et al. 2021 (45)<br><br>CONTAIN<br><br>NCT04435795<br><br>Industry<br>Academic<br>Foundation/non-profit<br>professional<br>organization | RCT (double-blinded), Canada<br><br>14<br><br>B.1.1.7 (alpha): NR<br>B.1.617.2 (delta): NR | COVID-19 vaccine received: Not eligible<br><br>Previous SARS-CoV-2 infection: NR<br><br>Presence and/or duration of symptoms: at least one related symptom | N=215<br>G1: 108<br>Ciclesonide 1200 µg inhaled + 200 µg/day intranasal<br><br>G2: 107<br>placebo | Age, years, median (IQR):<br>G1: 35 (27-47)<br>G2: 35 (27-45)<br><br>female (%):<br>G1: 51<br>G2: 56<br><br>Ethnicity (%):<br>Non-white:<br>G1: 38<br>G2: 41 | Proportion of symptomatic participants (%):<br>G1: 100<br>G2: 100<br><br>Duration of symptoms:<br>Median (IQR)<br>G1: 3 (2-4)<br>G2: 3 (2-4)<br><br>Proportion of participants with previous infections:<br>NR                                                                | Recovery <sup>†</sup> :<br>At 14 days:<br>G1: 69/105 (66)<br>G2: 57/98 (58)<br>Adjusted risk difference 7.5% (95% CI, -5.9% to 20.8%)<br><br>Symptom duration (time until symptom free): NR<br><br>All-cause mortality:<br>At 14 days: | Any AE:<br>At 14 days:<br>G1: 23/105 (22)<br>G2: 15/98 (15)<br>p=NR<br><br>Serious AE:<br>G1: 7/106 (7)<br>G2: 5/103 (5)<br>p=NR |

| Author, Year, Trial Name, Trial Registry No. Funding Risk of bias                                           | Design, Country, Duration (days) Dominant variant at time of study (%)*           | Eligibility criteria                                                                                                                                                                                                      | N total (randomized), Interventions, N group                                     | Population                                                                                                                                                                            | Baseline characteristics                                                                                                                                                                                                                                                                                        | Recovery, symptom duration, all-cause mortality, COVID-19 specific mortality, Hospitalization due to COVID-19 (n/N (%))                                                                                                                                                                     | Incidence of any adverse events, incidence of serious adverse events (n/N (%))                                                               |
|-------------------------------------------------------------------------------------------------------------|-----------------------------------------------------------------------------------|---------------------------------------------------------------------------------------------------------------------------------------------------------------------------------------------------------------------------|----------------------------------------------------------------------------------|---------------------------------------------------------------------------------------------------------------------------------------------------------------------------------------|-----------------------------------------------------------------------------------------------------------------------------------------------------------------------------------------------------------------------------------------------------------------------------------------------------------------|---------------------------------------------------------------------------------------------------------------------------------------------------------------------------------------------------------------------------------------------------------------------------------------------|----------------------------------------------------------------------------------------------------------------------------------------------|
| Low                                                                                                         |                                                                                   | Disease severity: NR<br><br>Pregnant women: Not eligible                                                                                                                                                                  |                                                                                  | Diagnostic tool: RT-PCR                                                                                                                                                               | Time (days) since previous infection: NR<br><br>Proportion of vaccinated participants: NA<br><br>Disease severity (%): NR<br><br>Currently pregnant (%): NA                                                                                                                                                     | G1: 0/108 (0)<br>G2: 0/107 (0)<br><br>COVID-19 specific mortality:<br>At 14 days:<br>G1: 0/108 (0)<br>G2: 0/107 (0)<br><br>Hospitalization due to COVID:<br>At 14 days:<br>G1: 3/105 (3)<br>G2: 6/98 (6)<br>Adjusted risk difference (stratification on sex), % (95% CI): 2.3 (-3.0 to 7.6) |                                                                                                                                              |
| Fluvoxamine                                                                                                 |                                                                                   |                                                                                                                                                                                                                           |                                                                                  |                                                                                                                                                                                       |                                                                                                                                                                                                                                                                                                                 |                                                                                                                                                                                                                                                                                             |                                                                                                                                              |
| Lenze et al. 2020 (40)<br><br>STOP COVID<br><br>NCT04342663<br><br>Government Academic<br><br>Some concerns | RCT (double-blinded),<br><br>U.S.,<br><br>15<br><br>B.1.427 and B.1.429 (epsilon) | COVID-19 vaccine received: NR<br><br>Previous SARS-CoV-2 infection: NR<br><br>Presence and/or duration of symptoms: symptomatic participants within 7 days of the first dose of study medication<br><br>Disease severity: | N=181 (152 received)<br><br>G1: 80<br>Fluvoxamine 100mg<br><br>G2: 72<br>Placebo | Age, years, mean (SD):<br>Median<br>G1: 46<br>G2: 45<br><br>female (%):<br>G1: 70<br>G2: 74<br><br>Ethnicity (%):<br>Non-white:<br>G1: 30<br>G2: 31<br><br>Diagnostic tool:<br>RT-PCR | Proportion of symptomatic participants (%):<br>G1: 100<br>G2: 100<br><br>Duration of symptoms:<br>Median (IQR)<br>G1: 4 (3-5)<br>G2: 4 (3-5)<br><br>Proportion of participants with previous infections:<br>NR<br><br>Time (days) since previous infection:<br>NR<br><br>Proportion of vaccinated participants: | Recovery <sup>†</sup> :<br>NR<br><br>Symptom duration (time until symptom free):<br>NR<br><br>All-cause mortality:<br>At 15 days:<br>G1: 0/80 (0)<br>G2: 0/72 (0)<br><br>COVID-19 specific mortality:<br>At 15 days:<br>G1: 0/80 (0)<br>G2: 0/72 (0)                                        | Any AE:<br>At 15 days:<br>G1: 12/80 (15)<br>G2: 11/72 (15)<br>p=NR<br><br>Serious AE:<br>At 15 days:<br>G1: 1/80 (1)<br>G2: 5/72 (7)<br>p=NR |

| Author, Year, Trial Name, Trial Registry No. Funding Risk of bias                                                          | Design, Country, Duration (days) Dominant variant at time of study (%)*                                           | Eligibility criteria                                                                                                                                                                                                         | N total (randomized), Interventions, N group                         | Population                                                                                                                                                               | Baseline characteristics                                                                                                                                                                                                                                                                                                                                                                                                       | Recovery, symptom duration, all-cause mortality, COVID-19 specific mortality, Hospitalization due to COVID-19 (n/N (%))                                                                                                                                                                                                     | Incidence of any adverse events, incidence of serious adverse events (n/N (%)) |
|----------------------------------------------------------------------------------------------------------------------------|-------------------------------------------------------------------------------------------------------------------|------------------------------------------------------------------------------------------------------------------------------------------------------------------------------------------------------------------------------|----------------------------------------------------------------------|--------------------------------------------------------------------------------------------------------------------------------------------------------------------------|--------------------------------------------------------------------------------------------------------------------------------------------------------------------------------------------------------------------------------------------------------------------------------------------------------------------------------------------------------------------------------------------------------------------------------|-----------------------------------------------------------------------------------------------------------------------------------------------------------------------------------------------------------------------------------------------------------------------------------------------------------------------------|--------------------------------------------------------------------------------|
|                                                                                                                            |                                                                                                                   | mild<br><br>Pregnant women:<br>Not eligible                                                                                                                                                                                  |                                                                      |                                                                                                                                                                          | NR<br><br>Disease severity (%):<br>Mild:<br>G1: 100<br>G2: 100<br><br>Currently pregnant (%):<br>NR                                                                                                                                                                                                                                                                                                                            | Hospitalization due to COVID:<br>At 15 days:<br>G1: 0/80 (0)<br>G2: 4/72 (6)<br>p=NR                                                                                                                                                                                                                                        |                                                                                |
| Reis et al. 2022 (39)<br><br>TOGETHER<br><br>NCT04727424<br><br>Foundation/non-profit professional organization<br><br>Low | RCT (double-blinded), Brazil<br><br>28<br><br>P.1 (gamma): NR<br>B.1.617.2 (delta): NR<br>B.1.1.529 (omicron): NR | COVID-19 vaccine received:<br>Not eligible<br><br>Previous SARS-CoV-2 infection:<br>NR<br><br>Presence and/or duration of symptoms: less than 8 days<br><br>Disease severity:<br>mild<br><br>Pregnant women:<br>Not eligible | N=1497<br><br>G1: 741<br>Fluvoxamine 100mg<br><br>G2: 756<br>Placebo | Age, years, median:<br>G1: 50<br>G2: 49<br><br>female (%):<br>G1: 55<br>G2: 60<br><br>Ethnicity (%):<br>Non-white:<br>G1: 99<br>G2: 99<br><br>Diagnostic tool:<br>RT-PCR | Proportion of symptomatic participants (%):<br>G1: 100<br>G2: 100<br><br>Duration of symptoms:<br>0-3 days (%):<br>G1: 44<br>G2: 41<br>4-7 days (%):<br>G1: 32<br>G2: 35<br>Unspecified (%):<br>G1: 23<br>G2: 24<br><br>Proportion of participants with previous infections:<br>NR<br><br>Time (days) since previous infection:<br>NR<br><br>Proportion of vaccinated participants:<br>NA<br><br>Disease severity (%):<br>Mild | Recovery <sup>†</sup> :<br>NR<br><br>Symptom duration (time until symptom free):<br>NR<br><br>All-cause mortality:<br>At 28 days:<br>G1: 17/741 (2)<br>G2: 25/756 (3)<br>p=NR<br><br>COVID-19 specific mortality:<br>NR<br><br>Hospitalization due to COVID:<br>At 28 days:<br>G1: 75/741 (10)<br>G2: 97/756 (13)<br>p=0.10 | Any AE:<br>NR<br><br>Serious AE:<br>NR                                         |

| Author, Year, Trial Name, Trial Registry No. Funding Risk of bias | Design, Country, Duration (days) Dominant variant at time of study (%)* | Eligibility criteria | N total (randomized), Interventions, N group | Population | Baseline characteristics                                | Recovery, symptom duration, all-cause mortality, COVID-19 specific mortality, Hospitalization due to COVID-19 (n/N (%)) | Incidence of any adverse events, incidence of serious adverse events (n/N (%)) |
|-------------------------------------------------------------------|-------------------------------------------------------------------------|----------------------|----------------------------------------------|------------|---------------------------------------------------------|-------------------------------------------------------------------------------------------------------------------------|--------------------------------------------------------------------------------|
|                                                                   |                                                                         |                      |                                              |            | G1: 100<br>G2: 100<br><br>Currently pregnant (%):<br>NA |                                                                                                                         |                                                                                |

\*<https://covariants.org/per-country>, <https://www.who.int/activities/tracking-SARS-CoV-2-variants>, †as defined by the authors; \*\*G5 included G4; \*\*\*data not included in the MA due to underdosage of ivermectin

**Abbreviations:** AE= adverse events; CI= confidence interval; COVID-19= coronavirus disease; G (1,2,3,4,5)= group; IQR= interquartile range; kg= kilogram; mg= milligrams; HR= hazard ratio; N= number of participants; NCT= National Clinical Trial; NR= not reported; OR= odds ratio; PCR= polymerase chain reaction; RCT= randomized controlled trial; RR= risk ratio; SARSCoV-2= Severe acute respiratory syndrome coronavirus type 2; SD= standard deviation; SE= standard error; TSR= time from the first dose to sustained clinical recovery; UK= United Kingdom; US= United States; µg= microgram

## Supplement Table 7: Definitions for Recovery

| Author, Year                              | Definition of recovery                                                                          |
|-------------------------------------------|-------------------------------------------------------------------------------------------------|
| Oldenburg, 2021 (41)                      | Absence of symptoms                                                                             |
| Schwartz, 2021 (27)                       | Symptom resolution                                                                              |
| Ezer, 2021 (45)                           | Resolution of self-reported fever and all respiratory symptoms                                  |
| Vallejos, 2021 (47)                       | RT-PCR negative                                                                                 |
| Buonfrate, 2022 (48)                      | Clinical resolution                                                                             |
| Jayk Bernal, 2022 (33)<br>Reis, 2022 (49) | Changes in WHO Clinical Progression Scale (which measures the clinical progression of Covid-19) |
| Rosignol, 2022 (43)                       | Participant symptom improvement                                                                 |
| Streinu-Cercel, 2021 (34)                 | Absent or mild symptoms for at least 24 hours                                                   |
| Kim, 2021 (42)                            | Mild or absent reported symptoms for a minimum of 24 hours                                      |
| Gottlieb, 2021 (44)                       | Mild or absent symptoms                                                                         |

Abbreviations: Covid-19= coronavirus disease; RT-PCR= reverse transcription polymerase chain reaction; WHO= World Health Organization.

# Supplement Figure 1: Risk of Bias

| Study               | Risk of bias domains |    |    |    |    | Overall |
|---------------------|----------------------|----|----|----|----|---------|
|                     | D1                   | D2 | D3 | D4 | D5 |         |
| Alemany 2022        | +                    | +  | +  | +  | +  | +       |
| Buonfrate 2022      | +                    | -  | ⊗  | -  | -  | ⊗       |
| Chaccour 2021       | -                    | +  | +  | +  | +  | -       |
| Streinu-Cercel 2022 | +                    | +  | +  | +  | +  | +       |
| Ezer 2021           | +                    | +  | +  | +  | +  | +       |
| Fischer 2022        | +                    | +  | +  | +  | +  | +       |
| Gottlieb 2021       | -                    | +  | +  | +  | +  | -       |
| Gupta 2022          | +                    | +  | +  | +  | +  | +       |
| Hammond 2022        | +                    | -  | -  | +  | +  | -       |
| Jayk Bernal 2022    | +                    | +  | +  | +  | +  | +       |
| Kim 2021            | +                    | -  | +  | +  | +  | -       |
| Korley 2021         | +                    | -  | +  | +  | +  | -       |
| Lenze 2020          | +                    | +  | -  | +  | +  | -       |
| Libster 2021        | +                    | +  | +  | +  | -  | -       |
| López-Medina 2021   | +                    | -  | +  | +  | -  | -       |
| Oldenburg 2021      | +                    | +  | -  | +  | +  | -       |
| Omrani 2020         | +                    | +  | +  | +  | -  | -       |
| Reis 2021           | +                    | -  | -  | +  | +  | -       |
| Reis 2022a          | +                    | +  | +  | +  | +  | +       |
| Reis 2022b          | +                    | +  | -  | +  | +  | -       |
| Rocco 2021          | +                    | +  | -  | +  | -  | -       |
| Rosignol 2022       | +                    | +  | -  | +  | -  | -       |
| Schwartz 2021       | +                    | +  | +  | +  | -  | -       |
| Sullivan 2022       | +                    | +  | +  | +  | +  | +       |
| Vallejos 2021       | +                    | +  | +  | +  | +  | +       |
| Weinreich 2021      | +                    | +  | +  | +  | -  | -       |

Domains:  
D1: Bias arising from the randomization process.  
D2: Bias due to deviations from intended intervention.  
D3: Bias due to missing outcome data.  
D4: Bias in measurement of the outcome.  
D5: Bias in selection of the reported result.

Judgement  
⊗ High  
- Some concerns  
+ Low

## Supplement Figures Summary Plots

### Supplement Figure 2: All-Cause Mortality – Summary Plot

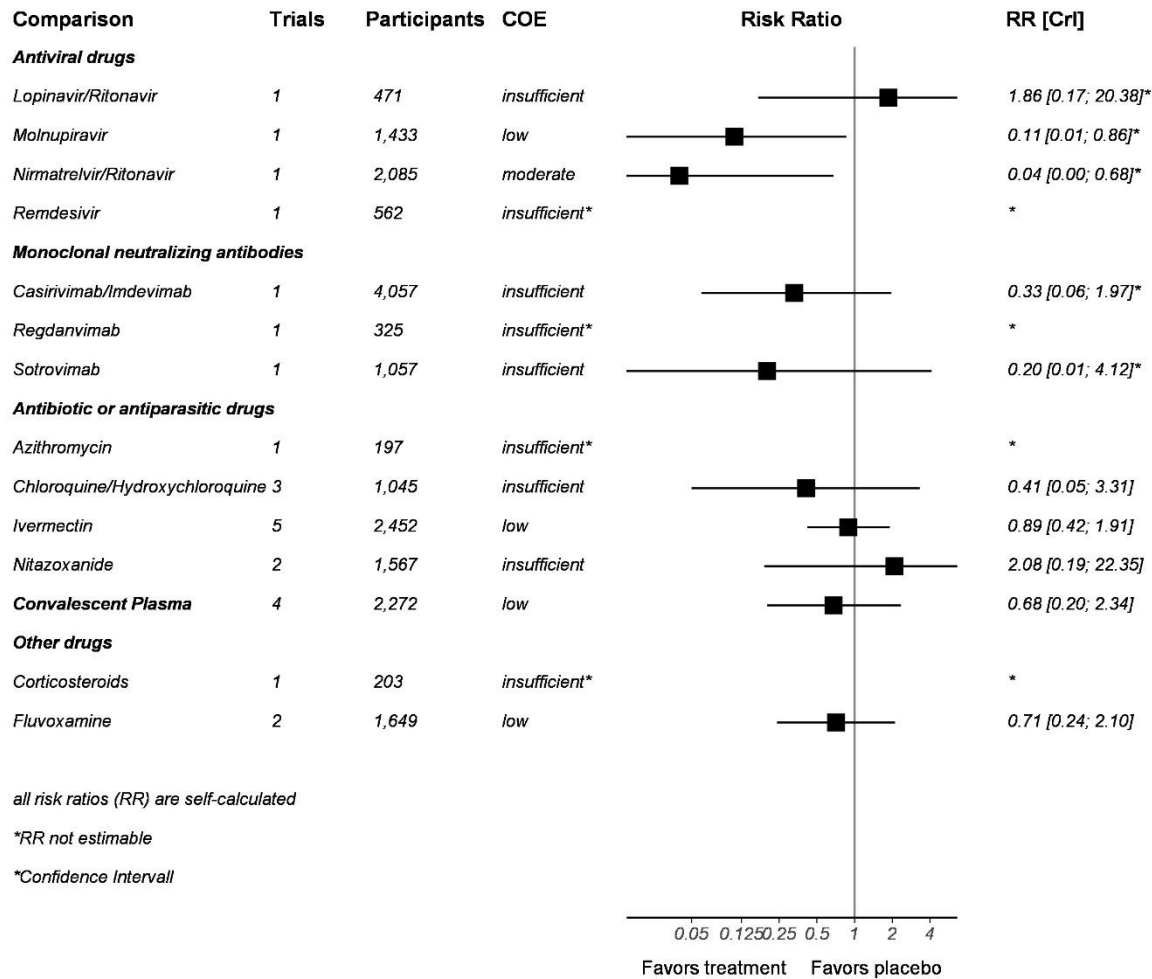

### Supplement Figure 3: Serious Adverse Events – Summary Plot

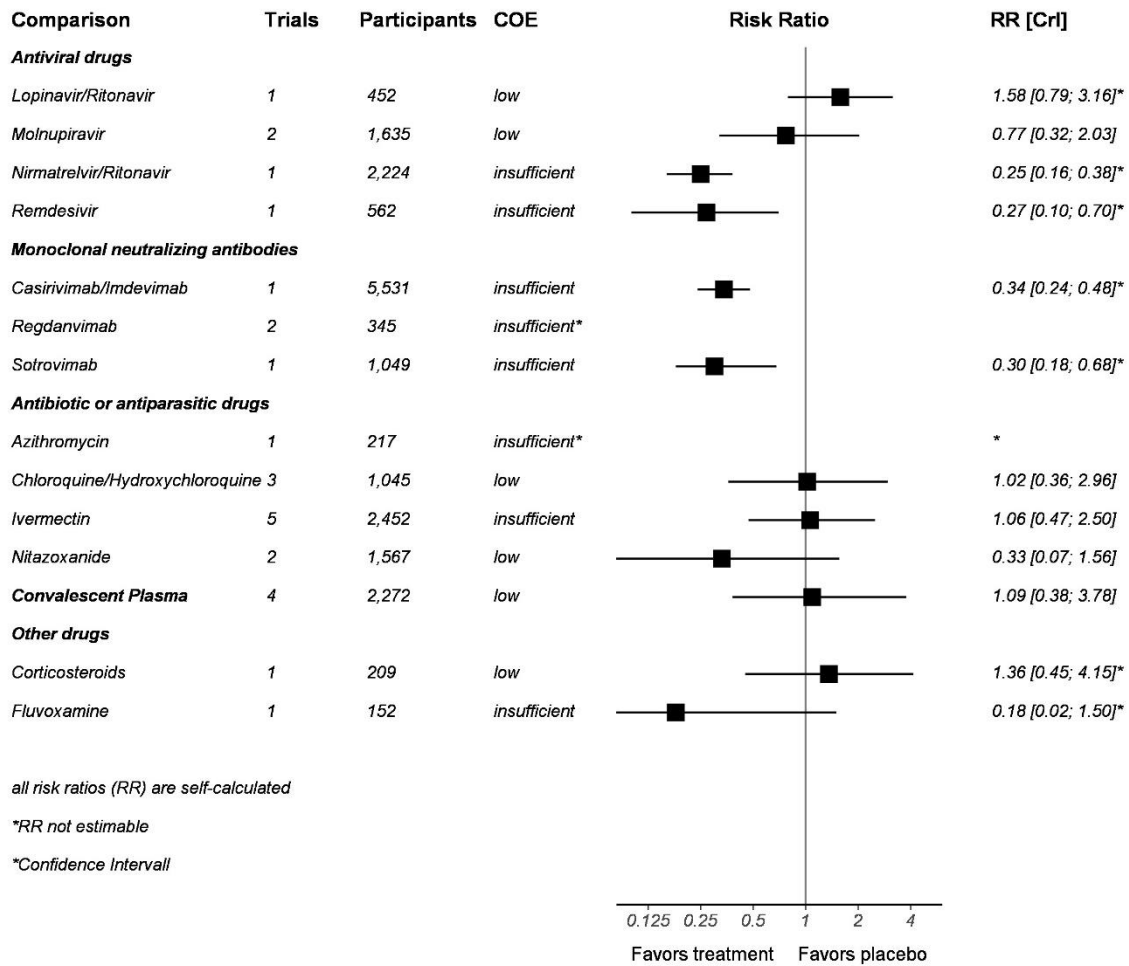



## Supplement Figures Meta Analyses

### Supplement Figure 4: Serious Adverse Events: Molnupiravir Versus Placebo

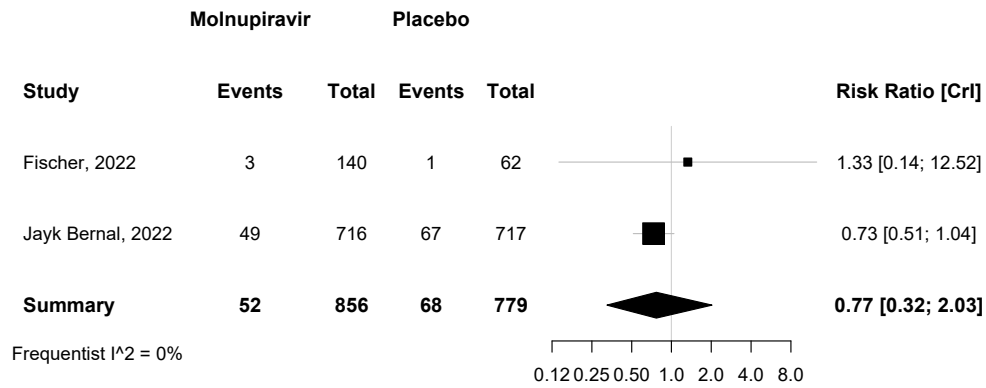

### Supplement Figure 5: Any Adverse Events: Molnupiravir Versus Placebo

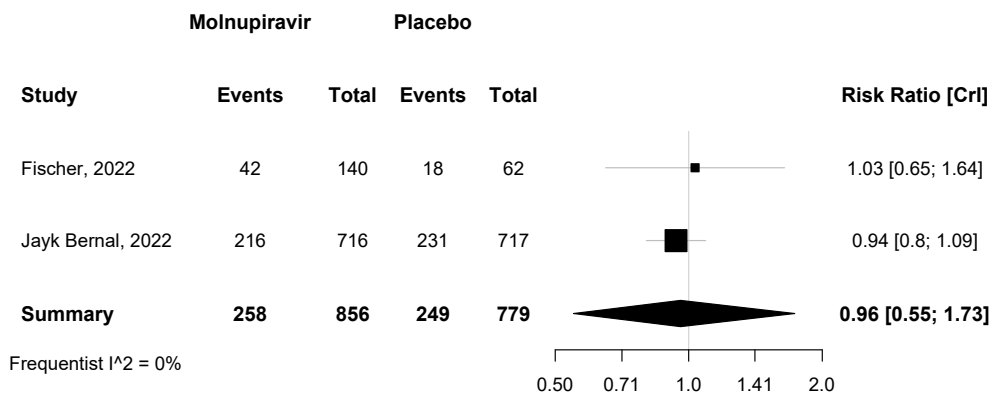

### Supplement Figure 6: Any Adverse Events: Regdanvimab Versus Placebo

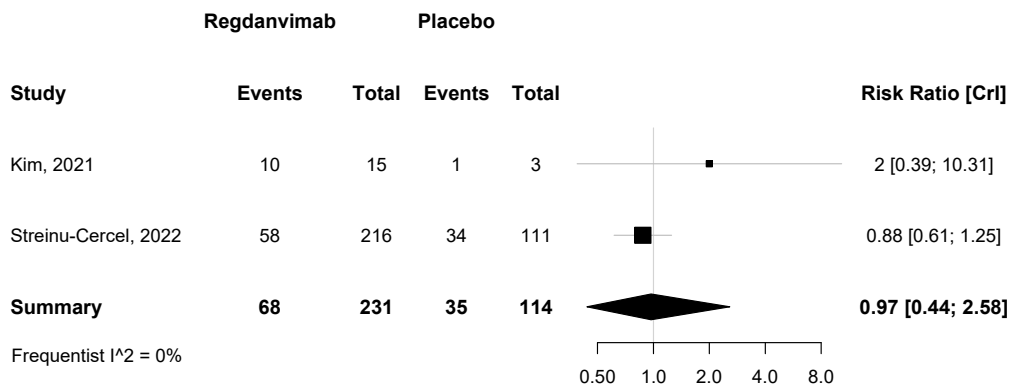

## Supplement Figure 7: Admission to Hospital due to COVID-19: Chloroquine Versus Placebo

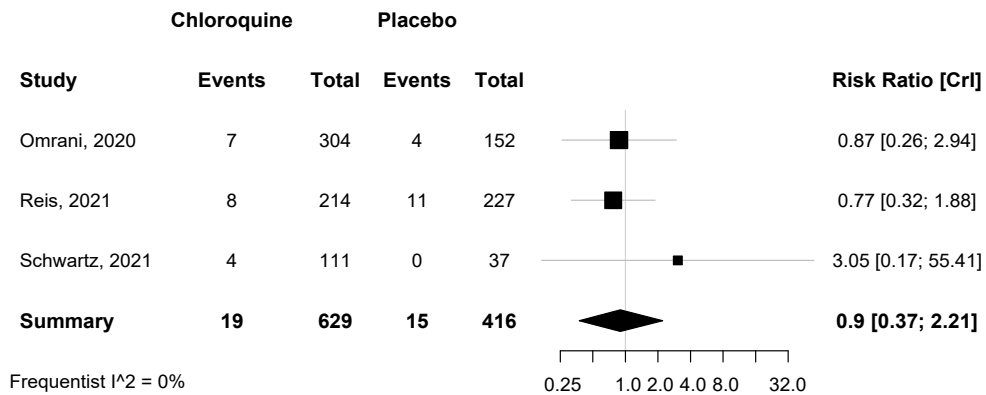

## Supplement Figure 8: Serious Adverse Events: Chloroquine Versus Placebo

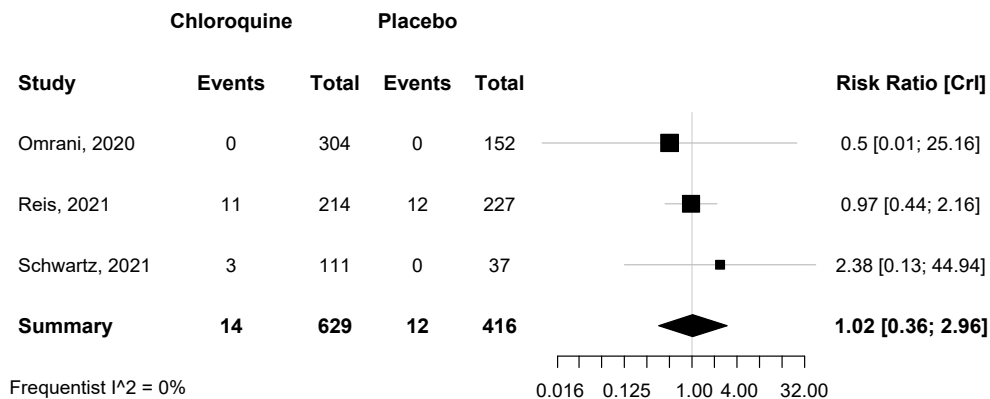

## Supplement Figure 9: All-Cause Mortality: Ivermectin Versus Placebo

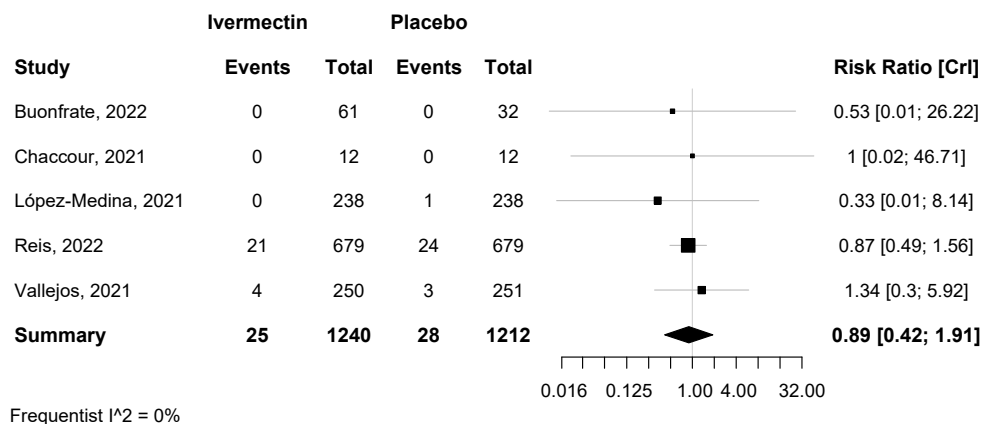

## Supplement Figure 10: Recovery: Ivermectin Versus Placebo

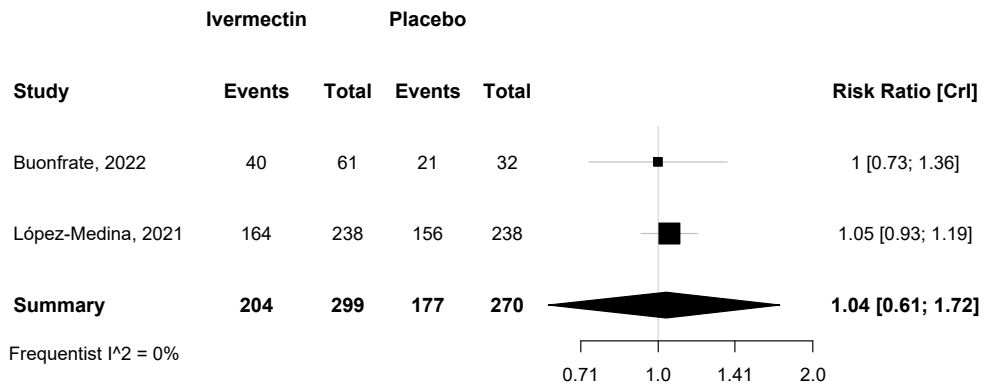

## Supplement Figure 11: Admission to Hospital due to COVID-19: Ivermectin Versus Placebo

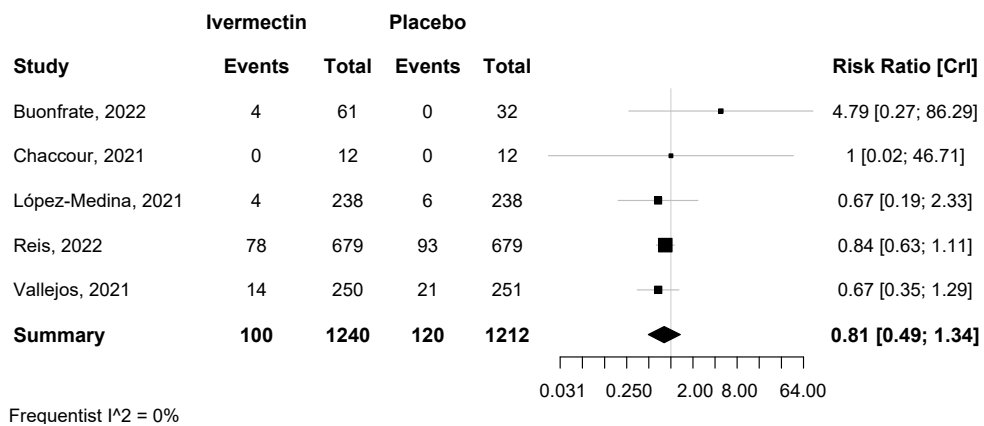

## Supplement Figure 12: Any Adverse Events: Ivermectin Versus Placebo

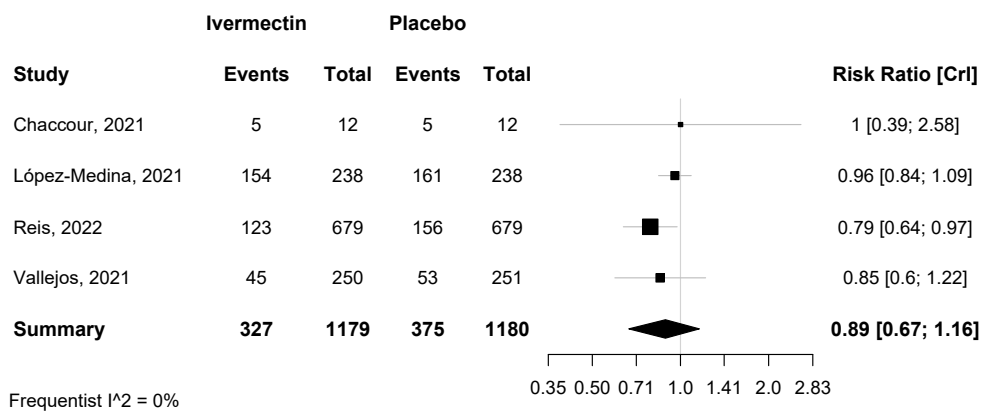

### Supplement Figure 13: Admission to Hospital due to COVID-19: Nitazoxanide Versus Placebo

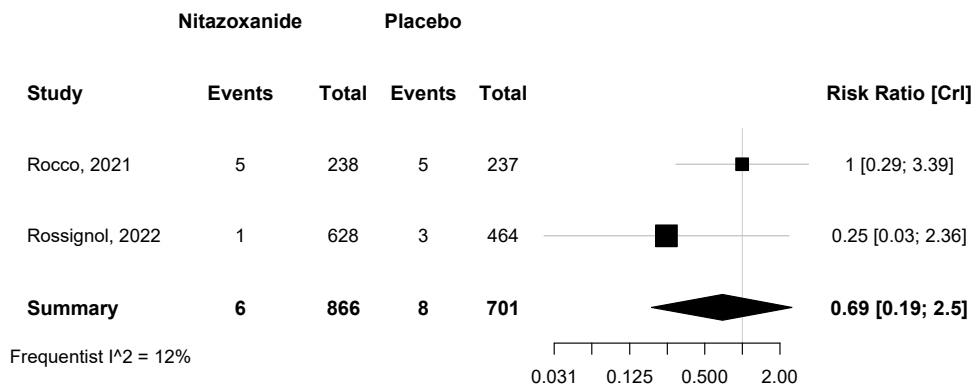

### Supplement Figure 14: Serious Adverse Events: Nitazoxanide Versus Placebo

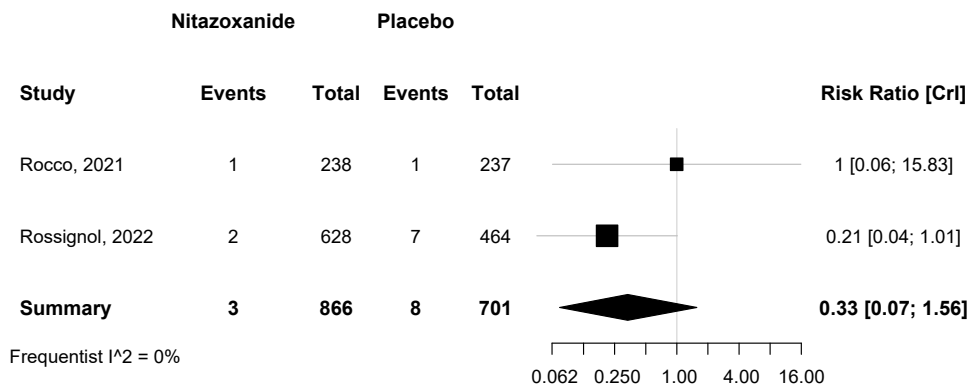

### Supplement Figure 15: Any Adverse Events: Nitazoxanide Versus Placebo

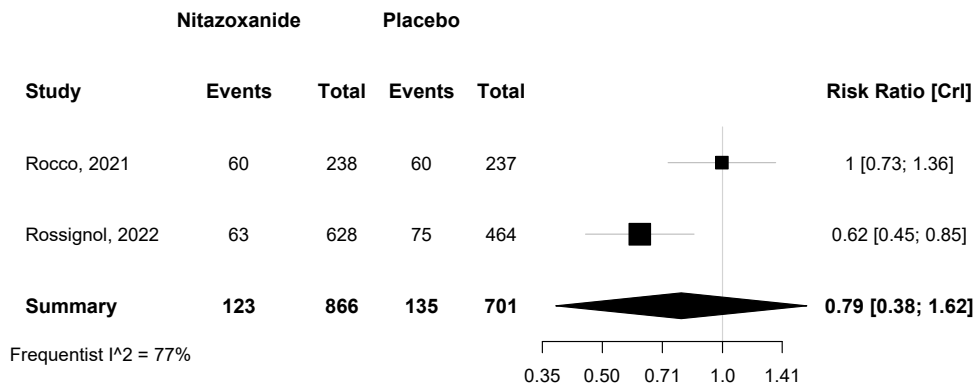

## Supplement Figure 16: All-Cause Mortality: Convalescent Plasma Versus Placebo

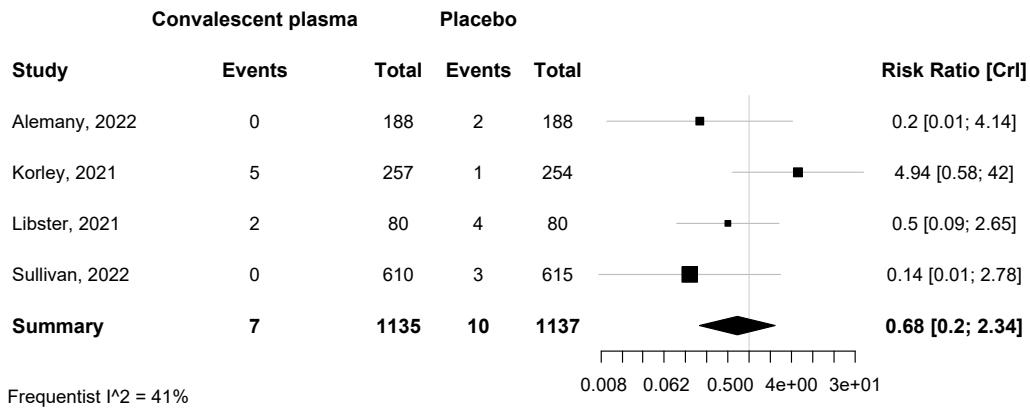

## Supplement Figure 17: Serious Adverse Events: Convalescent Plasma Versus Placebo

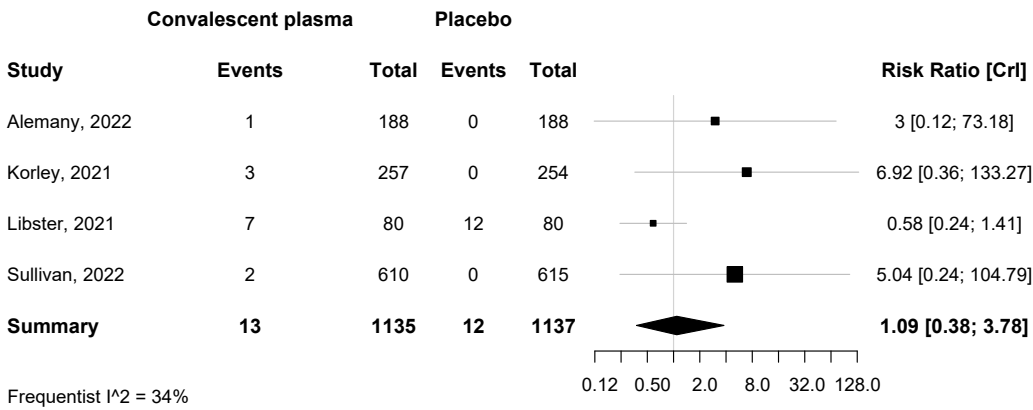

## Supplement Figure 18: All-Cause Mortality: Fluvoxamine Versus Placebo

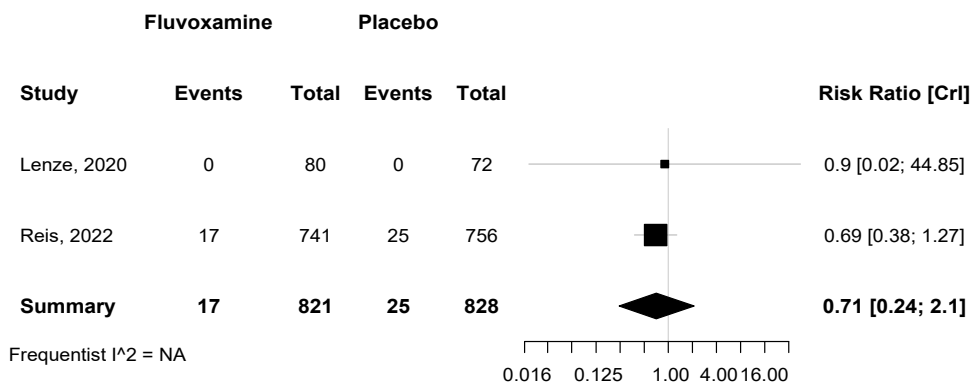

# Supplement Figure 19: Admission to Hospital due to COVID-19: Fluvoxamine Versus Placebo

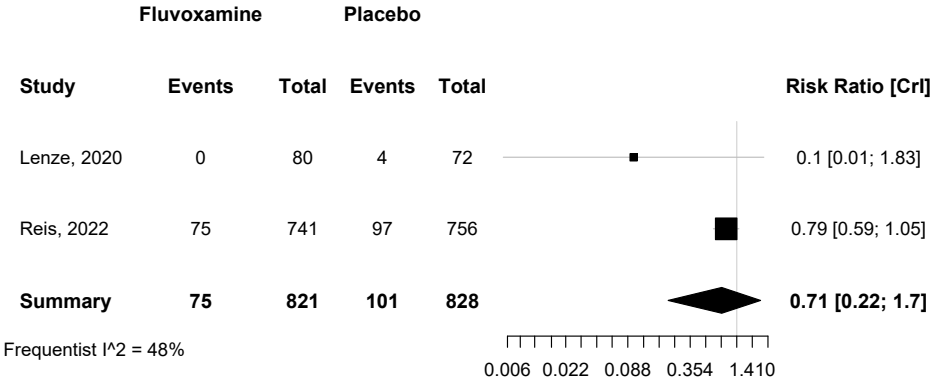

## Supplement Table 8: Summary of Findings Tables

### Lopinavir/ritonavir compared to Placebo for Adults with Confirmed COVID-19 Infection?

| Outcome<br>№ of participants<br>(studies)                                                              | Relative effect<br>(95% CI)       | Anticipated absolute effects (95% CI) |                                    |                                                 | Certainty                        | What happens                                                                                                       |
|--------------------------------------------------------------------------------------------------------|-----------------------------------|---------------------------------------|------------------------------------|-------------------------------------------------|----------------------------------|--------------------------------------------------------------------------------------------------------------------|
|                                                                                                        |                                   | Effect with placebo                   | Effect with<br>lopinavir/ritonavir | Difference                                      |                                  |                                                                                                                    |
| All-cause mortality<br>follow-up: 90 days<br>№ of participants:471<br>(1 RCT)(30)                      | <b>RR 1.86</b><br>(0.17 to 20.38) | 0.4%                                  | <b>0.8%</b><br>(0.1 to 9)          | <b>0.4% more</b><br>(0.4 fewer to 8.5 more)     | ○○○<br>Insufficient <sup>a</sup> | The evidence is very uncertain about the effect of lopinavir/ritonavir on all-cause mortality compared to placebo. |
| COVID-19-specific mortality -<br>not reported                                                          | -                                 | -                                     | -                                  | -                                               | -                                |                                                                                                                    |
| Recovery - not reported                                                                                | -                                 | -                                     | -                                  | -                                               | -                                |                                                                                                                    |
| Time to recovery - not<br>reported                                                                     | -                                 | -                                     | -                                  | -                                               | -                                |                                                                                                                    |
| Admission to hospital due to<br>COVID-19<br>follow-up: 90 days<br>№ of participants:471<br>(1 RCT)(30) | <b>HR 1.16</b><br>(0.53 to 2.56)  | 4.8%                                  | <b>5.7%</b><br>(2.6 to 11.9)       | <b>0.9% more</b><br>(2.2 fewer to 7.1 more)     | ⊕○○<br>Low <sup>b</sup>          | Lopinavir/ritonavir may result in no difference in admission to hospital due to COVID-19 compared to placebo.      |
| Serious adverse events<br>follow-up: 90 days<br>№ of participants:452<br>(1 RCT)(30)                   | <b>RR 1.58</b><br>(0.79 to 3.16)  | 5.5%                                  | <b>8.6%</b><br>(4.3 to 17.2)       | <b>3.1% more</b><br>(1.1 fewer to 11.8<br>more) | ⊕○○<br>Low <sup>b</sup>          | Lopinavir/ritonavir may result in no difference in serious adverse events compared to placebo.                     |
| Adverse events<br>follow-up: 90 days<br>№ of participants:452<br>(1 RCT)(30)                           | <b>RR 1.90</b><br>(1.40 to 2.57)  | 20.9%                                 | <b>39.7%</b><br>(29.3 to 53.7)     | <b>18.8% more</b><br>(8.4 more to 32.8<br>more) | ⊕○○<br>Low <sup>b</sup>          | Lopinavir/ritonavir may increase adverse events compared to placebo.                                               |

\*The risk in the intervention group (and its 95% confidence interval) is based on the assumed risk in the comparison group and the **relative effect** of the intervention (and its 95% CI).

CI: confidence interval; HR: hazard Ratio; no: number; RCT: randomized controlled trial; RR: risk ratio

### Explanations

a. Extremely few events; downgraded 3 steps for imprecision

b. Very few of events; downgraded 2 steps for imprecision

## Molnupiravir compared to Placebo for Adults with Confirmed COVID-19 Infection

| Outcome<br>№ of participants<br>(studies)                                                                       | Relative effect<br>(95% CI)                                                                                                                                                                                 | Anticipated absolute effects (95% CI) |                                |                                                | Certainty                    | What happens                                                                                           |
|-----------------------------------------------------------------------------------------------------------------|-------------------------------------------------------------------------------------------------------------------------------------------------------------------------------------------------------------|---------------------------------------|--------------------------------|------------------------------------------------|------------------------------|--------------------------------------------------------------------------------------------------------|
|                                                                                                                 |                                                                                                                                                                                                             | Effect with placebo                   | Effect with molnupiravir       | Difference                                     |                              |                                                                                                        |
| All-cause mortality<br>follow-up: 29 days<br>№ of participants:1,433<br>(1 RCT)(33)                             | <b>RR 0.11</b><br>(0.01 to 0.86)                                                                                                                                                                            | 1.3%                                  | <b>0.1%</b><br>(0 to 1.1)      | <b>1.2% fewer</b><br>(1.2 fewer to 0.2 fewer)  | ⊕○○<br>Low <sup>a</sup>      | Molnupiravir may result in a reduction in all-cause mortality compared to placebo.                     |
| COVID-19-specific mortality<br>follow-up: 29 days<br>№ of participants:1,433<br>(1 RCT)(33)                     | <b>RR 0.11</b><br>(0.01 to 0.86)                                                                                                                                                                            | 1.3%                                  | <b>0.1%</b><br>(0 to 1.1)      | <b>1.2% fewer</b><br>(1.2 fewer to 0.2 fewer)  | ⊕○○<br>Low <sup>a</sup>      | Molnupiravir may result in a reduction in COVID-specific mortality compared to placebo.                |
| Recovery<br>follow-up: 29 days<br>№ of participants:1,295<br>(1 RCT)(33)                                        | <b>OR 1.04</b><br>(0.84 to 1.29)                                                                                                                                                                            | 48.3%                                 | <b>48.4%</b><br>(44 to 54.7)   | <b>0.1% more</b><br>(4.3 fewer to 6.4 more)    | ⊕⊕○<br>Moderate <sup>b</sup> | Molnupiravir probably results in no difference in recovery compared to placebo.                        |
| Time to recovery<br>follow-up: 28 days<br>№ of participants:202<br>(1 RCT)(31)                                  | Median time: Molnupiravir 5.5 days (95% CI, 4.0 to 8.0) to 9.0 days (95% CI 6.0 vs. 12 days);<br>Placebo 8.5 days (95% CI, 7.0 to 11.0), no statistically significant difference (effect size not reported) |                                       |                                |                                                | ⊕○○<br>Low <sup>c</sup>      | Molnupiravir may result in no difference in time to recovery compared to placebo.                      |
| Admission to hospital due to<br>COVID-19<br>follow-up: 29 days<br>№ of participants:1,408<br>(1 RCT)(33)        | <b>RR 0.79</b><br>(0.54 to 1.16)                                                                                                                                                                            | 7.9%                                  | <b>6.2%</b><br>(4.2 to 9.1)    | <b>1.7% fewer</b><br>(3.6 fewer to 1.3 more)   | ⊕○○<br>Low <sup>a</sup>      | Molnupiravir may result in no difference in admission to hospital due to COVID-19 compared to placebo. |
| Serious adverse events<br>follow-up: range 28 days to 29<br>days<br>№ of participants:1,635<br>(2 RCTs)(31, 33) | <b>RR 0.77</b><br>(0.32 to 2.03)                                                                                                                                                                            | 8.7%                                  | <b>6.1%</b><br>(2.8 to 17.7)   | <b>2.6% fewer</b><br>(5.9 fewer to 9 more)     | ⊕○○<br>Low <sup>d,e</sup>    | Molnupiravir may result in no difference in serious adverse events compared to placebo.                |
| Adverse events<br>follow-up: range 28 days to 29<br>days<br>№ of participants:1,635<br>(2 RCTs)(31, 33)         | <b>RR 0.96</b><br>(0.55 to 1.73)                                                                                                                                                                            | 32.0%                                 | <b>30.1%</b><br>(17.6 to 55.3) | <b>1.9% fewer</b><br>(14.4 fewer to 23.3 more) | ⊕⊕○<br>Moderate <sup>f</sup> | Molnupiravir probably results in no difference in adverse events compared to placebo.                  |

\*The risk in the intervention group (and its 95% confidence interval) is based on the assumed risk in the comparison group and the **relative effect** of the intervention (and its 95% CI).

CI: confidence interval (1 study) or credible interval (≥2 studies); no: number; OR: odds ratio; RCT: randomized controlled trial; RR: risk ratio

### Explanations

a. Very few events; downgraded 2 steps for imprecision , b. Confidence [0.84 to 1.29] intervals are wide and encompass appreciable benefits or harms; downgraded 1 step for imprecision

c. Sample size does not meet optimal information size; downgraded 2 steps for imprecision , d. I<sup>2</sup> very high; downgraded one step for inconsistency , e. Confidence [0.32 to 2.03] intervals are wide and encompass appreciable benefits or harms; downgraded 1 step for imprecision , f. Confidence intervals [0.55 to 1.73] are wide and encompass appreciable benefits or harms; downgraded 1 step for imprecision



## Nirmatrelvir/Ritonavir compared to Placebo for Adults with Confirmed SARS-CoV-2 Infection

| Outcome<br>№ of participants<br>(studies)                                                                | Relative effect<br>(95% CI)         | Anticipated absolute effects (95% CI) |                                       |                                               | Certainty                        | What happens                                                                                                             |
|----------------------------------------------------------------------------------------------------------|-------------------------------------|---------------------------------------|---------------------------------------|-----------------------------------------------|----------------------------------|--------------------------------------------------------------------------------------------------------------------------|
|                                                                                                          |                                     | Effect with placebo                   | Effect with<br>nirmatrelvir/ritonavir | Difference                                    |                                  |                                                                                                                          |
| All-cause mortality<br>follow-up: 28 days<br>№ of participants:2,085<br>(1 RCT)(35)                      | <b>RR 0.040</b><br>(0.002 to 0.680) | 1.1%                                  | <b>0.0%</b><br>(0 to 0.8)             | <b>1.1% fewer</b><br>(1.1 fewer to 0.4 fewer) | ⊕⊕○<br>Moderate <sup>a</sup>     | Nirmatrelvir/ritonavir probably results in a reduction in all-cause mortality compared to placebo.                       |
| COVID-19-specific mortality -<br>not reported                                                            | -                                   | -                                     | -                                     | -                                             | -                                |                                                                                                                          |
| Recovery - not reported                                                                                  | -                                   | -                                     | -                                     | -                                             | -                                |                                                                                                                          |
| Time to recovery - not<br>reported                                                                       | -                                   | -                                     | -                                     | -                                             | -                                |                                                                                                                          |
| Admission to hospital due to<br>COVID-19<br>follow-up: 28 days<br>№ of participants:2,085<br>(1 RCT)(35) | <b>RR 0.12</b><br>(0.06 to 0.26)    | 6.2%                                  | <b>0.8%</b><br>(0.4 to 1.6)           | <b>5.4% fewer</b><br>(5.8 fewer to 4.6 fewer) | ⊕⊕○<br>Moderate <sup>a</sup>     | Nirmatrelvir/ritonavir probably results in a reduction in admission to hospital due to COVID-19 compared to placebo.     |
| Serious adverse events<br>follow-up: 34 days<br>№ of participants:2,224<br>(1 RCT)(35)                   | <b>RR 0.25</b><br>(0.16 to 0.38)    | 6.6%                                  | <b>1.6%</b><br>(1.1 to 2.5)           | <b>5.0% fewer</b><br>(5.6 fewer to 4.1 fewer) | ○○○<br>Insufficient <sup>b</sup> | The evidence is very uncertain about the effect of nirmatrelvir/ritonavir on serious adverse events compared to placebo. |
| Adverse events<br>follow-up: 34 days<br>№ of participants:2,224<br>(1 RCT)(35)                           | <b>RR 0.95</b><br>(0.82 to 1.10)    | 23.9%                                 | <b>22.6%</b><br>(19.6 to 26.2)        | <b>1.3% fewer</b><br>(4.3 fewer to 2.4 more)  | ⊕⊕⊕<br>High                      | Nirmatrelvir/ritonavir results in no difference in adverse events compared to placebo.                                   |

\*The risk in the intervention group (and its 95% confidence interval) is based on the assumed risk in the comparison group and the **relative effect** of the intervention (and its 95% CI).

CI: confidence interval; no: number; OR: odds ratio; RCT: randomized controlled trial; RR: risk ratio

### Explanations

a. Number of events does not meet optimal information size; downgraded 1 step for imprecision

b. Few events with chance effects; a significantly higher risk for serious adverse events for placebo than nirmatrelvir/ritonavir is not plausible; downgraded 3 steps for imprecision

## Remdesivir compared to Placebo for Adults with Confirmed COVID-19 Infection

| Outcome<br>№ of participants<br>(studies)                                                              | Relative effect<br>(95% CI)      | Anticipated absolute effects (95% CI) |                                |                                                  | Certainty                          | What happens                                                                                                                |
|--------------------------------------------------------------------------------------------------------|----------------------------------|---------------------------------------|--------------------------------|--------------------------------------------------|------------------------------------|-----------------------------------------------------------------------------------------------------------------------------|
|                                                                                                        |                                  | Effect with placebo                   | Effect with remdesivir         | Difference                                       |                                    |                                                                                                                             |
| All-cause mortality<br>follow-up: 28 days<br>№ of participants:562<br>(1 RCT)(44)                      | not estimable                    | 0.0%                                  | <b>0.0%</b><br>(0 to 0)        | <b>0.0% fewer</b><br>(0 fewer to 0 fewer)        | ○○○<br>Insufficient <sup>a</sup>   | The evidence is very uncertain about the effect of remdesivir on all-cause mortality compared to placebo.                   |
| COVID-19-specific mortality -<br>not reported                                                          | -                                | -                                     | -                              | -                                                | -                                  |                                                                                                                             |
| Recovery<br>follow-up: 14 days<br>№ of participants:334<br>(1 RCT)(44)                                 | <b>RR 1.80</b><br>(1.25 to 2.60) | 20.0%                                 | <b>36.1%</b><br>(25 to 52)     | <b>16.1% more</b><br>(5 more to 32 more)         | ⊕○○<br>Low <sup>b</sup>            | Remdesivir may increase recovery compared to placebo.                                                                       |
| Time to recovery - not<br>reported                                                                     | -                                | -                                     | -                              | -                                                | -                                  |                                                                                                                             |
| Admission to hospital due to<br>COVID-19<br>follow-up: 28 days<br>№ of participants:562<br>(1 RCT)(44) | <b>HR 0.28</b><br>(0.10 to 0.75) | 6.4%                                  | <b>1.8%</b><br>(0.7 to 4.8)    | <b>4.6% fewer</b><br>(5.7 fewer to 1.6<br>fewer) | ○○○<br>Insufficient <sup>c,d</sup> | The evidence is very uncertain about the effect of remdesivir on admission to hospital due to COVID-19 compared to placebo. |
| Serious adverse events<br>follow-up: 28 days<br>№ of participants:562<br>(1 RCT)(44)                   | <b>RR 0.27</b><br>(0.10 to 0.70) | 6.7%                                  | <b>1.8%</b><br>(0.7 to 4.7)    | <b>4.9% fewer</b><br>(6 fewer to 2 fewer)        | ○○○<br>Insufficient <sup>e</sup>   | The evidence is very uncertain about the effect of remdesivir on serious adverse events compared to placebo.                |
| Adverse events<br>follow-up: 28 days<br>№ of participants:562<br>(1 RCT)(44)                           | <b>RR 0.91</b><br>(0.76 to 1.10) | 46.3%                                 | <b>42.3%</b><br>(35.2 to 50.9) | <b>4.0% fewer</b><br>(11.1 fewer to 4.6<br>more) | ⊕⊕○<br>Moderate <sup>f</sup>       | Remdesivir probably results in no difference in adverse events compared to placebo.                                         |

\*The risk in the intervention group (and its 95% confidence interval) is based on the assumed risk in the comparison group and the **relative effect** of the intervention (and its 95% CI).

CI: confidence interval; HR: hazard Ratio; no: number; RCT: randomized controlled trial; RR: risk ratio

### Explanations

- Extremely few events; downgraded 3 steps for imprecision
- Very few events; downgraded 2 steps for imprecision
- hospitalization for any cause as outcome; downgraded 1 step for indirectness
- Very few events; downgraded 2 steps for imprecision
- Very few events with chance effects; a significantly higher risk for serious adverse events for placebo than remdesivir is not plausible; downgraded 3 steps for imprecision
- Number of events does not meet optimal information size; downgraded 1 step for imprecision

## Casirivimab/imdevimab compared to Placebo for Adults with Confirmed COVID-19 Infection

| Outcome<br>№ of participants<br>(studies)                                                                | Relative effect<br>(95% CI)                                                                | Anticipated absolute effects (95% CI) |                                      |                                               | Certainty                        | What happens                                                                                                            |
|----------------------------------------------------------------------------------------------------------|--------------------------------------------------------------------------------------------|---------------------------------------|--------------------------------------|-----------------------------------------------|----------------------------------|-------------------------------------------------------------------------------------------------------------------------|
|                                                                                                          |                                                                                            | Effect with placebo                   | Effect with<br>casirivimab/imdevimab | Difference                                    |                                  |                                                                                                                         |
| All-cause mortality<br>follow-up: 29 days<br>№ of participants:4,057<br>(1 RCT)(25)                      | <b>RR 0.33</b><br>(0.06 to 1.97)                                                           | 0.2%                                  | <b>0.1%</b><br>(0 to 0.4)            | <b>0.1% fewer</b><br>(0.2 fewer to 0.2 more)  | ○○○<br>Insufficient <sup>a</sup> | The evidence is very uncertain about the effect of casirivimab/imdevimab on all-cause mortality compared to placebo.    |
| COVID-19-specific mortality -<br>not reported                                                            | -                                                                                          | -                                     | -                                    | -                                             | -                                |                                                                                                                         |
| Recovery - not reported                                                                                  | -                                                                                          | -                                     | -                                    | -                                             | -                                |                                                                                                                         |
| Time to recovery<br>follow-up: 29 days<br>№ of participants:3,432<br>(1 RCT)(25)                         | Median days: Casirivimab/imdevimab 10 (95% CI, NR) vs Placebo: 14 (95%CI, NR) <sup>b</sup> |                                       |                                      |                                               | ⊕⊕⊕<br>High                      | Casirivimab/imdevimab reduces time to recovery compared to placebo.                                                     |
| Admission to hospital due to<br>COVID-19<br>follow-up: 29 days<br>№ of participants:4,057<br>(1 RCT)(25) | <b>RR 0.30</b><br>(0.20 to 0.45)                                                           | 4.4%                                  | <b>1.3%</b><br>(0.9 to 2)            | <b>3.1% fewer</b><br>(3.5 fewer to 2.4 fewer) | ⊕⊕○<br>Moderate <sup>c</sup>     | Casirivimab/imdevimab probably results in a reduction in admission to hospital due to COVID-19 compared to placebo.     |
| Serious adverse events<br>follow-up: 29 days<br>№ of participants:5,531<br>(1 RCT)(25)                   | <b>RR 0.34</b><br>(0.24 to 0.48)                                                           | 4.0%                                  | <b>1.4%</b><br>(1 to 1.9)            | <b>2.6% fewer</b><br>(3.1 fewer to 2.1 fewer) | ○○○<br>Insufficient <sup>d</sup> | The evidence is very uncertain about the effect of casirivimab/imdevimab on serious adverse events compared to placebo. |
| Adverse events<br>follow-up: 29 days<br>№ of participants:5,531<br>(1 RCT)(25)                           | <b>RR 0.76</b><br>(0.63 to 0.90)                                                           | 10.3%                                 | <b>7.8%</b><br>(6.5 to 9.2)          | <b>2.5% fewer</b><br>(3.8 fewer to 1 fewer)   | ○○○<br>Insufficient <sup>e</sup> | The evidence is very uncertain about the effect of casirivimab/imdevimab on adverse events compared to placebo.         |

\*The risk in the intervention group (and its 95% confidence interval) is based on the assumed risk in the comparison group and the **relative effect** of the intervention (and its 95% CI).

CI: confidence interval; NR; not reported; no: number; OR: odds ratio; RR: risk ratio; vs: versus

### Explanations

a. Very few events; downgraded 3 steps for imprecision

b. Dosage of 8,000mg not considered in appraisal for time to recovery, as no data are reported for this study arm.

c. Few events; downgraded 1 step for imprecision

d. Few events with chance effects; a significantly higher risk for serious adverse events for placebo than Casirivimab/Imdevimab is not plausible; downgraded 3 steps for imprecision

e. A significantly higher risk for serious adverse events for placebo than Casirivimab/Imdevimab is not plausible; downgraded 3 steps for imprecision

## Regdanvimab compared to Placebo for Adults with Confirmed COVID-19 Infection

| Outcome<br>№ of participants<br>(studies)                                                                  | Relative effect<br>(95% CI)                                                                                                                                                                             | Anticipated absolute effects (95% CI) |                                |                                                | Certainty                        | What happens                                                                                                  |
|------------------------------------------------------------------------------------------------------------|---------------------------------------------------------------------------------------------------------------------------------------------------------------------------------------------------------|---------------------------------------|--------------------------------|------------------------------------------------|----------------------------------|---------------------------------------------------------------------------------------------------------------|
|                                                                                                            |                                                                                                                                                                                                         | Effect with placebo                   | Effect with<br>regdanvimab     | Difference                                     |                                  |                                                                                                               |
| All-cause mortality<br>follow-up: 28 days<br>№ of participants:325<br>(1 RCT)(34)                          | not estimable                                                                                                                                                                                           | 0.0%                                  | <b>0.0%</b><br>(0 to 0)        | <b>0.0% fewer</b><br>(0 fewer to 0 fewer)      | ○○○<br>Insufficient <sup>a</sup> | The evidence is very uncertain about the effect of regdanvimab on all-cause mortality compared to placebo.    |
| COVID-19-specific mortality -<br>not reported                                                              | -                                                                                                                                                                                                       | -                                     | -                              | -                                              | -                                |                                                                                                               |
| Recovery<br>follow-up: 28 days<br>№ of participants:285<br>(1 RCT)(34)                                     | <b>RR 1.21</b><br>(1.05 to 1.38)                                                                                                                                                                        | 71.7%                                 | <b>86.8%</b><br>(75.3 to 99)   | <b>15.1% more</b><br>(3.6 more to 27.3 more)   | ⊕⊕○<br>Moderate <sup>b</sup>     | Regdanvimab probably increases recovery compared to placebo.                                                  |
| Time to recovery<br>follow-up: range 14 days to 28 days<br>№ of participants:303<br>(2 RCTs)(34, 42)       | Median days: Regdanvimab 5.5 (95% CI, 4.0 to 8.0) to 9.0 (95%CI, 6.0 to 13.0); Placebo: 8.0 (95% CI, 6.0 to 12.0) to 8.5 (95%CI, 7.0 to 11.0); no statistically significant difference (effect size NR) |                                       |                                |                                                | ⊕○○<br>Low <sup>c</sup>          | Regdanvimab may result in no difference in time to recovery compared to placebo.                              |
| Admission to hospital due to<br>COVID-19<br>follow-up: 28 days<br>№ of participants:307<br>(1 RCT)(34)     | <b>RR 0.51</b><br>(0.21 to 1.26)                                                                                                                                                                        | 8.7%                                  | <b>4.4%</b><br>(1.8 to 10.9)   | <b>4.3% fewer</b><br>(6.8 fewer to 2.3 more)   | ⊕○○<br>Low <sup>d</sup>          | Regdanvimab may result in no difference in admission to hospital due to COVID-19 compared to placebo.         |
| Serious adverse events<br>follow-up: range 14 days to 28 days<br>№ of participants:345<br>(2 RCTs)(34, 42) | not estimable                                                                                                                                                                                           | 0.0%                                  | <b>0.0%</b><br>(0 to 0)        | <b>0.0% fewer</b><br>(0 fewer to 0 fewer)      | ○○○<br>Insufficient <sup>a</sup> | The evidence is very uncertain about the effect of regdanvimab on serious adverse events compared to placebo. |
| Adverse events<br>follow-up: range 14 days to 28 days<br>№ of participants:345 (2 RCTs)(34, 42)            | <b>RR 0.97</b><br>(0.44 to 2.58)                                                                                                                                                                        | 30.7%                                 | <b>29.4%</b><br>(13.5 to 79.2) | <b>0.3% fewer</b><br>(17.2 fewer to 48.5 more) | ⊕○○<br>Low <sup>b,e</sup>        | Regdanvimab may result in no difference in adverse events compared to placebo.                                |

\*The risk in the intervention group (and its 95% confidence interval) is based on the assumed risk in the comparison group and the **relative effect** of the intervention (and its 95% CI).

CI: confidence interval (1 study) or credible interval ( $\geq 2$  studies); NR; not reported; no: number; RCT: randomized controlled trial; RR: risk ratio

### Explanations

a. No events; downgraded 3 steps for imprecision, b. Few events; downgraded 1 step for imprecision

c. Confidence intervals in both studies are too wide and encompass appreciable benefits or harms; downgraded 2 steps for imprecision

d. Very few events; downgraded 2 steps for imprecision, e. Confidence [0.44 to 2.58] intervals are wide and encompass appreciable benefits or harms; downgraded 1 step for imprecision

## Sotrovimab compared to Placebo for Adults with Confirmed COVID-19 Infection

| Outcome<br>№ of participants<br>(studies)                                                                | Relative effect<br>(95% CI)      | Anticipated absolute effects (95% CI) |                                |                                                  | Certainty                        | What happens                                                                                                 |
|----------------------------------------------------------------------------------------------------------|----------------------------------|---------------------------------------|--------------------------------|--------------------------------------------------|----------------------------------|--------------------------------------------------------------------------------------------------------------|
|                                                                                                          |                                  | Effect with placebo                   | Effect with sotrovimab         | Difference                                       |                                  |                                                                                                              |
| All-cause mortality<br>follow-up: 29 days<br>№ of participants:1,057<br>(1 RCT)(38)                      | <b>RR 0.20</b><br>(0.01 to 4.12) | 0.4%                                  | <b>0.0%</b><br>(0 to 1.6)      | <b>0.4% fewer</b><br>(0.4 fewer to 1.2 more)     | ○○○<br>Insufficient <sup>a</sup> | The evidence is very uncertain about the effect of sotrovimab on all-cause mortality compared to placebo.    |
| COVID-19-specific mortality -<br>not reported                                                            | -                                | -                                     | -                              | -                                                | -                                |                                                                                                              |
| Recovery - not reported                                                                                  | -                                | -                                     | -                              | -                                                | -                                |                                                                                                              |
| Time to recovery - not<br>reported                                                                       | -                                | -                                     | -                              | -                                                | -                                |                                                                                                              |
| Admission to hospital due to<br>COVID-19<br>follow-up: 29 days<br>№ of participants:1,057<br>(1 RCT)(38) | <b>RR 0.20</b><br>(0.08 to 0.48) | 5.7%                                  | <b>1.1%</b><br>(0.5 to 2.7)    | <b>4.6% fewer</b><br>(5.2 fewer to 2.9<br>fewer) | ⊕○○<br>Low <sup>b</sup>          | Sotrovimab may result in a reduction in admission to hospital due to COVID-19 compared to placebo.           |
| Serious adverse events<br>follow-up: 29 days<br>№ of participants:1,049<br>(1 RCT)(38)                   | <b>RR 0.35</b><br>(0.18 to 0.68) | 6.1%                                  | <b>2.1%</b><br>(1.1 to 4.1)    | <b>4.0% fewer</b><br>(5 fewer to 1.9 fewer)      | ○○○<br>Insufficient <sup>c</sup> | The evidence is very uncertain about the effect of sotrovimab on serious adverse events compared to placebo. |
| Adverse events<br>follow-up: 29 days<br>№ of participants:1,049<br>(1 RCT)(38)                           | <b>RR 0.93</b><br>(0.74 to 1.17) | 23.4%                                 | <b>21.8%</b><br>(17.3 to 27.4) | <b>1.6% fewer</b><br>(6.1 fewer to 4 more)       | ⊕⊕○<br>Moderate <sup>d</sup>     | Sotrovimab probably results in no difference in adverse events compared to placebo.                          |

\*The risk in the intervention group (and its 95% confidence interval) is based on the assumed risk in the comparison group and the **relative effect** of the intervention (and its 95% CI).

CI: confidence interval; no: number; OR: odds ratio; RCT: randomized controlled trial; RR: risk ratio

### Explanations

a. Very few events; downgraded 3 steps for imprecision

b. Few events; downgraded 2 steps for imprecision

c. Very few events with chance effects; a significantly higher risk for serious adverse events for placebo than sotrovimab is not plausible; downgraded 3 steps for imprecision.

d. Confidence [0.74 to 1.17] intervals are wide and encompass appreciable benefits or harms; downgraded 1 step for imprecision

## Antibiotics (Azithromycin) compared to Placebo for Adults with Confirmed COVID-19 Infection

| Outcome<br>№ of participants<br>(studies)                                                                       | Relative effect<br>(95% CI)        | Anticipated absolute effects (95% CI) |                                |                                                  | Certainty                        | What happens                                                                                                                                |
|-----------------------------------------------------------------------------------------------------------------|------------------------------------|---------------------------------------|--------------------------------|--------------------------------------------------|----------------------------------|---------------------------------------------------------------------------------------------------------------------------------------------|
|                                                                                                                 |                                    | Effect with placebo                   | Effect with<br>azithromycin    | Difference                                       |                                  |                                                                                                                                             |
| All-cause mortality<br>follow-up: 21 days<br>№ of participants:197<br>(1 RCT)(41)                               | not estimable                      | 0.0%                                  | <b>0.0%</b><br>(0 to 0)        | <b>0.0% fewer</b><br>(0 fewer to 0 fewer)        | ○○○<br>Insufficient <sup>a</sup> | The evidence is very uncertain about the effect of antibiotics (azithromycin) on all-cause mortality compared to placebo.                   |
| COVID-19-specific mortality -<br>not reported                                                                   | -                                  | -                                     | -                              | -                                                | -                                |                                                                                                                                             |
| Recovery<br>assessed with: Absence of<br>symptoms<br>follow-up: 14 days<br>№ of participants:201<br>(1 RCT)(41) | <b>RR 1.02</b><br>(0.91 to 1.13)   | 50.0%                                 | 50.4%<br>(45.5 to 56.5)        | 0.6% more<br>(4.5 fewer to 6.5 more)             | ⊕○○<br>Low <sup>b</sup>          | Antibiotics (azithromycin) may result in no difference in recovery compared to placebo.                                                     |
| Time to recovery - not<br>reported                                                                              | -                                  | -                                     | -                              | -                                                | -                                |                                                                                                                                             |
| Admission to hospital due to<br>COVID-19<br>follow-up: 21 days<br>№ of participants:197<br>(1 RCT)(41)          | <b>RR 6.37</b><br>(0.36 to 113.59) | 0.0%                                  | <b>4.0%</b><br>(0 to 0)        | <b>4.0% more</b><br>(0 fewer to 8 more)          | ○○○<br>Insufficient <sup>a</sup> | The evidence is very uncertain about the effect of antibiotics (azithromycin) on admission to hospital due to COVID-19 compared to placebo. |
| Serious adverse events<br>follow-up: 21 days<br>№ of participants:217<br>(1 RCT)(41)                            | not estimable                      | 0.0%                                  | <b>0.0%</b><br>(0 to 0)        | <b>0.0% fewer</b><br>(0 fewer to 0 fewer)        | ○○○<br>Insufficient <sup>a</sup> | The evidence is very uncertain about the effect of antibiotics (azithromycin) on serious adverse events compared to placebo.                |
| Adverse events<br>follow-up: 3 days<br>№ of participants:217<br>(1 RCT)(41)                                     | <b>RR 2.14</b><br>(1.42 to 3.23)   | 26.4%                                 | <b>56.6%</b><br>(37.5 to 85.2) | <b>30.2% more</b><br>(11.1 more to 58.8<br>more) | ⊕○○<br>Low <sup>b</sup>          | Antibiotics (azithromycin) may increase adverse events compared to placebo.                                                                 |

\*The risk in the intervention group (and its 95% confidence interval) is based on the assumed risk in the comparison group and the relative effect of the intervention (and its 95% CI).

CI: confidence interval; no: number; RCT: randomized controlled trial; RR: risk ratio

### Explanations

a. Extremely few events; downgraded 3 steps for imprecision

b. Number of events does not meet optimal information size; downgraded 1 step for imprecision

## Chloroquine/Hydroxychloroquine compared to Placebo for Adults with Confirmed COVID-19 Infection

| Outcome<br>№ of participants<br>(studies)                                                                                             | Relative effect<br>(95% CI)                                                                                                          | Anticipated absolute effects (95% CI) |                                               |                                                    | Certainty                        | What happens                                                                                                                       |
|---------------------------------------------------------------------------------------------------------------------------------------|--------------------------------------------------------------------------------------------------------------------------------------|---------------------------------------|-----------------------------------------------|----------------------------------------------------|----------------------------------|------------------------------------------------------------------------------------------------------------------------------------|
|                                                                                                                                       |                                                                                                                                      | Effect with placebo                   | Effect with<br>chloroquine/hydroxychloroquine | Difference                                         |                                  |                                                                                                                                    |
| All-cause mortality<br>follow-up: range 21 days to<br>90 days<br>№ of participants:1,045<br>(3 RCTs)(27, 28, 30)                      | <b>RR 0.41</b><br>(0.05 to 3.31)                                                                                                     | 0.2%                                  | <b>0.0%</b><br>(0 to 0.8)                     | <b>0.2% fewer</b><br>(0.2 fewer to 0.6<br>more)    | ○○○<br>Insufficient <sup>a</sup> | The evidence is very uncertain about the effect of chloroquine/hydroxychloroquine on all-cause mortality compared to placebo.      |
| COVID-19-specific<br>mortality<br>follow-up: range 21 days to<br>30 days<br>№ of participants:604<br>(2 RCTs)(27, 28)                 | not estimable                                                                                                                        | 0.0%                                  | <b>0.0%</b><br>(0 to 0)                       | <b>0.0% fewer</b><br>(0 fewer to 0 fewer)          | ○○○<br>Insufficient <sup>b</sup> | The evidence is very uncertain about the effect of chloroquine/hydroxychloroquine on COVID-specific mortality compared to placebo. |
| Recovery<br>follow-up: 30 days<br>№ of participants:147<br>(1 RCT)(27)                                                                | <b>RR 0.78</b><br>(0.62 to 0.97)                                                                                                     | 78.4%                                 | <b>60.9%</b><br>(48.6 to 76)                  | <b>17.5% fewer</b><br>(29.8 fewer to 2.4<br>fewer) | ⊕○○<br>Low <sup>c</sup>          | Chloroquine/Hydroxychloroquine may reduce recovery compared to placebo.                                                            |
| Time to recovery<br>follow-up: 30 days<br>№ of participants:148<br>(1 RCT)(27)                                                        | Median time: Hydroxychloroquine 14.0 days (95% CI, 10.0 to 20.0) vs. Placebo 12.0 days (95% CI, 7.0 to 18.0); p=0.3 (effect size NR) |                                       |                                               |                                                    | ⊕○○<br>Low <sup>c</sup>          | Chloroquine/Hydroxychloroquine may result in no difference in time to recovery compared to placebo.                                |
| Admission to hospital due<br>to COVID-19<br>follow-up: range 21 days to<br>90 days<br>№ of participants:1,045<br>(3 RCTs)(27, 28, 30) | <b>RR 0.90</b><br>(0.37 to 2.21)                                                                                                     | 3.6%                                  | <b>3.0%</b><br>(1.3 to 8)                     | <b>0.6% fewer</b><br>(2.3 fewer to 4.4<br>more)    | ⊕○○<br>Low <sup>c</sup>          | Chloroquine/hydroxychloroquine may result in no difference in admission to hospital due to COVID-19 compared to placebo.           |
| Serious adverse events<br>follow-up: range 21 days to<br>90 days<br>№ of participants:1,045<br>(3 RCTs)(27, 28, 30)                   | <b>RR 1.02</b><br>(0.36 to 2.96)                                                                                                     | 2.9%                                  | <b>2.2%</b><br>(1 to 8.5)                     | <b>0.7% fewer</b><br>(1.8 fewer to 5.7<br>more)    | ⊕○○<br>Low <sup>c</sup>          | Chloroquine/hydroxychloroquine may result in no difference in serious adverse events compared to placebo.                          |
| Adverse events<br>follow-up: 90 days<br>№ of participants:427<br>(1 RCT) (30)                                                         | <b>RR 1.06</b><br>(0.74 to 1.53)                                                                                                     | 20.9%                                 | <b>22.2%</b><br>(15.5 to 32)                  | <b>1.3% more</b><br>(5.4 fewer to 11.1<br>more)    | ⊕○○<br>Low <sup>c</sup>          | Chloroquine/hydroxychloroquine may result in no difference in adverse events compared to placebo.                                  |

\*The risk in the intervention group (and its 95% confidence interval) is based on the assumed risk in the comparison group and the relative effect of the intervention (and its 95% CI).

CI: confidence interval (1 study) or credible interval (≥2 studies); no: number; RCT: randomized controlled trial; RR: risk ratio; vs: versus

### Explanations

a. Extremely few events; downgraded 3 steps for imprecision; b. No events; downgraded 3 steps for imprecision, c. Very few of events; downgraded 2 steps for imprecision

## Ivermectin compared to Placebo for Adults with Confirmed COVID-19 Infection

| Outcome<br>№ of participants<br>(studies)                                                                                     | Relative effect<br>(95% CI)                                                                                                                                               | Anticipated absolute effects (95% CI) |                                |                                               | Certainty                          | What happens                                                                                                   |
|-------------------------------------------------------------------------------------------------------------------------------|---------------------------------------------------------------------------------------------------------------------------------------------------------------------------|---------------------------------------|--------------------------------|-----------------------------------------------|------------------------------------|----------------------------------------------------------------------------------------------------------------|
|                                                                                                                               |                                                                                                                                                                           | Effect with placebo                   | Effect with ivermectin         | Difference                                    |                                    |                                                                                                                |
| All-cause mortality<br>follow-up: range 21 to 30 days<br>№ of participants:2,452<br>(5 RCTs)(26, 29, 47-49)                   | <b>RR 0.89</b><br>(0.42 to 1.91)                                                                                                                                          | 2.3%                                  | <b>2.0%</b><br>(1.0 to 4.4)    | <b>0.3% fewer</b><br>(1.3 fewer to 2.1 more)  | ⊕○○<br>Low <sup>a</sup>            | Ivermectin may result in no difference in all-cause mortality compared to placebo..                            |
| COVID-19-specific mortality<br>follow-up: range 21 to 30 days<br>№ of participants:593<br>(3 RCTs)(26, 29, 48)                | <b>RR 0.55</b><br>(0.07 to 4.37)                                                                                                                                          | 0.4%                                  | <b>0.0%</b><br>(0 to 1.5)      | <b>0.4% fewer</b><br>(0.3 fewer to 1.2 more)  | ○○○<br>Insufficient <sup>b,c</sup> | The evidence is very uncertain about the effect of ivermectin on COVID-specific mortality compared to placebo. |
| Recovery<br>follow-up: range 21 to 30 days<br>№ of participants:569<br>(2 RCTs)(26, 48)                                       | <b>RR 1.04</b><br>(0.61 to 1.72)                                                                                                                                          | 65.6%                                 | <b>68.2%</b><br>(40 to 100)    | <b>2.6% more</b><br>(25.6 fewer to 47.2 more) | ⊕⊕○<br>Moderate <sup>d</sup>       | Ivermectin probably results in no difference in recovery compared to placebo.                                  |
| Time to recovery<br>follow-up: range 21 to 30 days<br>№ of participants:1,836<br>(3 RCTs)(26, 48, 49)                         | Time to recovery in three trials: ivermectin 10 to 29 days (IQR varied from 9 to 37 days) compared with placebo 12 to 14 days (IQR varied from 9 to 30 days) <sup>d</sup> |                                       |                                |                                               | ○○○<br>Insufficient <sup>b,e</sup> | The evidence is very uncertain about the effect of ivermectin on time to recovery compared to placebo.         |
| Admission to hospital due to COVID-19<br>follow-up: range 21 to 30 days<br>№ of participants:2,452<br>(5 RCTs)(26, 29, 47-49) | <b>RR 0.81</b><br>(0.49 to 1.345)                                                                                                                                         | 9.9%                                  | <b>8.1%</b><br>(4 to 18.3)     | <b>1.8% fewer</b><br>(5.0 fewer to 3.4 more)  | ⊕○○<br>Low <sup>f</sup>            | Ivermectin may result in no difference in admission to hospital due to COVID-19 compared to placebo.           |
| Serious adverse events<br>follow-up: range 21 to 30 days<br>№ of participants:2,452<br>(5 RCTs)(26, 29, 47-49)                | <b>RR 1.06</b><br>(0.47 to 2.5)                                                                                                                                           | 1.7%                                  | <b>1.9%</b><br>(0.6 to 6.6)    | <b>0.2% more</b><br>(0.9 fewer to 2.5 more)   | ○○○<br>Insufficient <sup>b,a</sup> | The evidence is very uncertain about the effect of ivermectin on serious adverse events compared to placebo.   |
| Adverse events<br>follow-up: range 21 to 30 days<br>№ of participants:2,359<br>(4 RCTs)(26, 29, 47, 49)                       | <b>RR 0.89</b><br>(0.67 to 1.16)                                                                                                                                          | 31.8%                                 | <b>27.7%</b><br>(19.4 to 40.0) | <b>4.1% fewer</b><br>(10.5 fewer to 5.1 more) | ⊕⊕○<br>Moderate <sup>g</sup>       | Ivermectin probably results in no difference in adverse events compared to placebo.                            |

\*The risk in the intervention group (and its 95% confidence interval) is based on the assumed risk in the comparison group and the **relative effect** of the intervention (and its 95% CI).

CI: confidence interval (1 study) or credible interval (≥2 studies); IQR: interquartile range; no: number; RCT: randomized controlled trial; RR: risk ratio

### Explanations

a. Very few events; downgraded 2 steps for imprecision, b. One of three trials was high risk of bias; downgraded 1 step for risk of bias, c. Extremely few events; downgraded 3 steps for imprecision, d. One of two trials was high risk of bias; downgraded 1 step for risk of bias, e. Interquartile range vary; downgraded 2 steps for imprecision, f. Credible intervals are wide and encompass appreciable benefits or harms; downgraded 2 step for imprecision, g. Credible intervals are wide and encompass appreciable benefits or harms; downgraded 1 step for imprecision



## Nitazoxanide compared to Placebo for Adults with Confirmed SARS-CoV-2 Infection

| Outcome<br>№ of participants<br>(studies)                                                                                  | Relative effect<br>(95% CI)                                       | Anticipated absolute effects (95% CI) |                                |                                                | Certainty                        | What happens                                                                                                     |
|----------------------------------------------------------------------------------------------------------------------------|-------------------------------------------------------------------|---------------------------------------|--------------------------------|------------------------------------------------|----------------------------------|------------------------------------------------------------------------------------------------------------------|
|                                                                                                                            |                                                                   | Effect with placebo                   | Effect with nitazoxanide       | Difference                                     |                                  |                                                                                                                  |
| All-cause mortality<br>follow-up: range 14 days to 28 days<br>№ of participants:1,567<br>(2 RCTs)(32, 43)                  | <b>RR 1.61</b><br>(0.07 to 39.42)                                 | 0.0%                                  | <b>0.2%</b><br>(0 to 0)        | <b>0.2% more</b><br>(0.1 fewer to 2.7 more)    | ○○○<br>Insufficient <sup>a</sup> | The evidence is very uncertain about the effect of nitazoxanide on all-cause mortality compared to placebo.      |
| COVID-19-specific mortality<br>follow-up: mean 28 days<br>№ of participants:1,092<br>(1 RCT)(43)                           | <b>RR 2.68</b><br>(0.13 to 55.74)                                 | 0.0%                                  | <b>0.2%</b><br>(0 to 0)        | <b>0.2% more</b><br>(0.1 fewer to 5.9 more)    | ○○○<br>Insufficient <sup>a</sup> | The evidence is very uncertain about the effect of nitazoxanide on COVID-specific mortality compared to placebo. |
| Recovery<br>follow-up: mean 5 days<br>№ of participants:392<br>(1 RCT)(32)                                                 | <b>RR 0.94</b><br>(0.83 to 1.07)                                  | 73.7%                                 | <b>69.6%</b><br>(61.2 to 78.9) | <b>4.1% fewer</b><br>(12.5 fewer to 5.2 more)  | ⊕⊕○<br>Moderate <sup>b</sup>     | Nitazoxanide probably results in no difference in recovery compared to placebo.                                  |
| Time to recovery<br>№ of participants:379 (1 RCT)(43)                                                                      | Median days 13.3 (IQR 6.3 to 21) vs. 12.4 (IQR 7.2 to 21); p=0.88 |                                       |                                |                                                | ⊕⊕○<br>Moderate <sup>b</sup>     | Nitazoxanide probably results in no difference in time to recovery compared to placebo.                          |
| Admission to hospital due to COVID-19<br>follow-up: range 5 days to 28 days<br>№ of participants:1,567<br>(2 RCTs)(32, 43) | <b>RR 0.69</b><br>(0.19 to 2.50)                                  | 1.1%                                  | <b>0.7%</b><br>(0.2 to 2.9)    | <b>0.4% fewer</b><br>(0.9 fewer to 1.7 more)   | ⊕○○<br>Low <sup>c</sup>          | Nitazoxanide may result in no difference in admission to hospital due to COVID-19 compared to placebo.           |
| Serious adverse events<br>follow-up: range 5 days to 28 days<br>№ of participants:1,567<br>(2 RCTs)(32, 43)                | <b>RR 0.33</b><br>(0.07 to 1.56)                                  | 1.1%                                  | <b>0.3%</b><br>(0.1 to 1.8)    | <b>0.8% fewer</b><br>(1.1 fewer to 0.6 more)   | ⊕○○<br>Low <sup>c</sup>          | Nitazoxanide may result in no difference in serious adverse events compared to placebo.                          |
| Adverse events<br>follow-up: range 5 days to 28 days<br>№ of participants:1,567<br>(2 RCTs)(32, 43)                        | <b>RR 0.79</b><br>(0.38 to 1.62)                                  | 19.3%                                 | <b>14.2%</b><br>(7.3 to 31.2)  | <b>5.1% fewer</b><br>(11.9 fewer to 11.9 more) | ⊕⊕○<br>Moderate <sup>d</sup>     | Nitazoxanide probably results in no difference in adverse events compared to placebo.                            |

\*The risk in the intervention group (and its 95% confidence interval) is based on the assumed risk in the comparison group and the relative effect of the intervention (and its 95% CI).

CI: confidence interval (1 study) or credible interval (≥2 studies); IQR: interquartile range; no: number; RCT: randomized controlled trial; RR: risk ratio

### Explanations

a. Extremely few events; downgraded 3 steps for imprecision, b. Sample size does not meet optimal information size; downgraded 1 step for imprecision

c. Very few events; downgraded 2 steps for imprecision, d. Number of events does not meet optimal information size; downgraded 1 step for imprecision

## Convalescent Plasma compared to Placebo for Adults with Confirmed COVID-19 Infection

| Outcome<br>№ of participants<br>(studies)                                                                                | Relative effect<br>(95% CI)                                                                                       | Anticipated absolute effects (95% CI) |                                    |                                               | Certainty                          | What happens                                                                                                                         |
|--------------------------------------------------------------------------------------------------------------------------|-------------------------------------------------------------------------------------------------------------------|---------------------------------------|------------------------------------|-----------------------------------------------|------------------------------------|--------------------------------------------------------------------------------------------------------------------------------------|
|                                                                                                                          |                                                                                                                   | Effect with placebo                   | Effect with<br>convalescent plasma | Difference                                    |                                    |                                                                                                                                      |
| All-cause mortality<br>follow-up: range 15 days to 28<br>days<br>№ of participants:2,272<br>(4 RCTs)(24, 36, 37, 46)     | <b>RR 0.68</b><br>(0.20 to 2.34)                                                                                  | 0.9%                                  | <b>0.6%</b><br>(0.2 to 2.1)        | <b>0.3% fewer</b><br>(0.7 fewer to 1.2 more)  | ⊕○○<br>Low <sup>a</sup>            | Convalescent plasma may result in no difference in all-cause mortality compared to placebo.                                          |
| COVID-19-specific mortality<br>follow-up: range 15 days to 28<br>days<br>№ of participants:1,385<br>(2 RCTs) (24, 46)    | <b>RR 0.37</b><br>(0.08 to 1.84)                                                                                  | 1.0%                                  | <b>0.3%</b><br>(0.1 to 1.9)        | <b>0.7% fewer</b><br>(0.9 fewer to 0.8 more)  | ○○○<br>Insufficient <sup>b</sup>   | The evidence is very uncertain about the effect of convalescent plasma on COVID-specific mortality compared to placebo.              |
| Recovery - not reported                                                                                                  | -                                                                                                                 | -                                     | -                                  | -                                             | -                                  |                                                                                                                                      |
| Time to recovery<br>follow-up: 30 days<br>№ of participants:376<br>(1 RCT)(37)                                           | Convalescent plasma 12.0 median days (IQR 6.0–21.3) vs. placebo 12.0 (6.0–22.0); HR 1.05<br>(95% CI 0.85 to 1.30) |                                       |                                    |                                               | ⊕○○<br>Low <sup>a</sup>            | Convalescent plasma may result in no difference in time to recovery compared to placebo.                                             |
| Admission to hospital due to<br>COVID-19<br>follow-up: 28 days<br>№ of participants:1601<br>(2 RCTs)(37, 46)             | <b>RR 0.70</b><br>(0.30 to 1.65)                                                                                  | 7.2%                                  | <b>4.9%</b><br>(2.2 to 11.9)       | <b>2.3% fewer</b><br>(5.1 fewer to 4.7 more)  | ○○○<br>Insufficient <sup>a,c</sup> | The evidence is very uncertain about the effect of convalescent plasma on admission to hospital due to COVID-19 compared to placebo. |
| Serious adverse events<br>follow-up: range 15 days to 28<br>days<br>№ of participants: 2,272<br>(4 RCTs)(24, 36, 37, 46) | <b>RR 1.09</b><br>(0.38 to 3.78)                                                                                  | 1.1%                                  | <b>1.1%</b><br>(0.4 to 4)          | <b>0.1% more</b><br>(0.7 fewer to 2.9 more)   | ⊕○○<br>Low <sup>a</sup>            | Convalescent plasma may result in no difference in serious adverse events compared to placebo.                                       |
| Adverse events<br>follow-up: 28 days<br>№ of participants:1,601<br>(2 RCTs)(37, 46)                                      | <b>RR 1.20</b><br>(0.41 to 3.89)                                                                                  | 7.8%                                  | <b>7.3%</b><br>(3.2 to 30.5)       | <b>0.5% fewer</b><br>(4.6 fewer to 22.7 more) | ○○○<br>Insufficient <sup>a,c</sup> | The evidence is very uncertain about the effect of convalescent plasma on adverse events compared to placebo.                        |

\*The risk in the intervention group (and its 95% confidence interval) is based on the assumed risk in the comparison group and the relative effect of the intervention (and its 95% CI).

CI: confidence interval (1 study) or credible interval (≥2 studies); IQR: interquartile range; HR: hazard ratio; no: number; RCT: randomized controlled trial; RR: risk ratio

### Explanations

a. Very few events; downgraded 2 steps for imprecision

b. Extremely few events; downgraded 3 steps for imprecision

c. Conflicting results between 2 RCTs; downgraded 1 step for inconsistency

## Corticosteroids compared to Placebo for Adults with Confirmed COVID-19 Infection

| Outcome<br>№ of participants<br>(studies)                                                           | Relative effect<br>(95% CI)      | Anticipated absolute effects (95% CI) |                                |                                              | Certainty                        | What happens                                                                                                                     |
|-----------------------------------------------------------------------------------------------------|----------------------------------|---------------------------------------|--------------------------------|----------------------------------------------|----------------------------------|----------------------------------------------------------------------------------------------------------------------------------|
|                                                                                                     |                                  | Effect with placebo                   | Effect with corticosteroids    | Difference                                   |                                  |                                                                                                                                  |
| All-cause mortality<br>follow-up: 14 days<br>№ of participants:203<br>(1 RCT)(45)                   | not estimable                    | 0.0%                                  | <b>0.0%</b><br>(0 to 0)        | <b>0.0% fewer</b><br>(0 fewer to 0 fewer)    | ○○○<br>Insufficient <sup>a</sup> | The evidence is very uncertain about the effect of corticosteroids on all-cause mortality compared to placebo.                   |
| COVID-19-specific mortality<br>follow-up: 14 days<br>№ of participants:215<br>(1 RCT)(45)           | not estimable                    | 0.0%                                  | <b>0.0%</b><br>(0 to 0)        | <b>0.0% fewer</b><br>(0 fewer to 0 fewer)    | ○○○<br>Insufficient <sup>a</sup> | The evidence is very uncertain about the effect of corticosteroids on COVID-specific mortality compared to placebo..             |
| Recovery<br>follow-up: 14 days<br>№ of participants:203<br>(1 RCT)(45)                              | <b>RR 1.13</b><br>(0.91 to 1.40) | 58.2%                                 | <b>65.7%</b><br>(52.9 to 81.4) | <b>7.5% more</b><br>(5.2 fewer to 23.3 more) | ⊕○○<br>Low <sup>b</sup>          | Corticosteroids may result in no difference in recovery compared to placebo.                                                     |
| Time to recovery - not reported                                                                     | -                                | -                                     | -                              | -                                            | -                                |                                                                                                                                  |
| Admission to hospital due to COVID-19<br>follow-up: 14 days<br>№ of participants:203<br>(1 RCT)(45) | <b>RR 0.47</b><br>(0.12 to 1.82) | 6.1%                                  | <b>2.9%</b><br>(0.7 to 11.1)   | <b>3.2% fewer</b><br>(5.4 fewer to 5 more)   | ○○○<br>Insufficient <sup>a</sup> | The evidence is very uncertain about the effect of corticosteroids on admission to hospital due to COVID-19 compared to placebo. |
| Serious adverse events<br>follow-up: 14 days<br>№ of participants:209<br>(1 RCT)(45)                | <b>RR 1.36</b><br>(0.45 to 4.15) | 4.9%                                  | <b>6.6%</b><br>(2.2 to 20.1)   | <b>1.7% more</b><br>(2.7 fewer to 15.3 more) | ⊕○○<br>Low <sup>b</sup>          | Corticosteroids may result in no difference in serious adverse events compared to placebo.                                       |
| Adverse events<br>№ of participants:203<br>(1 RCT)(45)                                              | <b>RR 1.43</b><br>(0.79 to 2.58) | 15.3%                                 | <b>21.9%</b><br>(12.1 to 39.5) | <b>6.6% more</b><br>(3.2 fewer to 24.2 more) | ⊕○○<br>Low <sup>b</sup>          | Corticosteroids may result in no difference in adverse events compared to placebo.                                               |

\*The risk in the intervention group (and its 95% confidence interval) is based on the assumed risk in the comparison group and the **relative effect** of the intervention (and its 95% CI).

CI: confidence interval; no: number; RCT: randomised controlled trial; RR: risk ratio

### Explanations

a. Extremely few events; downgraded 3 steps for imprecision

b. Very few events; downgraded 2 steps for imprecision

## Fluvoxamine compared to Placebo for Adults with Confirmed COVID-19 Infection

| Outcome<br>№ of participants<br>(studies)                                                                                   | Relative effect<br>(95% CI)      | Anticipated absolute effects (95% CI) |                              |                                               | Certainty                        | What happens                                                                                                    |
|-----------------------------------------------------------------------------------------------------------------------------|----------------------------------|---------------------------------------|------------------------------|-----------------------------------------------|----------------------------------|-----------------------------------------------------------------------------------------------------------------|
|                                                                                                                             |                                  | Effect with placebo                   | Effect with fluvoxamine      | Difference                                    |                                  |                                                                                                                 |
| All-cause mortality<br>follow-up: range 15 days to 28 days<br>№ of participants:1,649<br>(2 RCTs)(39, 40)                   | <b>RR 0.71</b><br>(0.24 to 2.10) | 3.0%                                  | <b>2.1%</b><br>(0.7 to 6.3)  | <b>0.9% fewer</b><br>(2.3 fewer to 3.3 more)  | ⊕○○<br>Low <sup>a</sup>          | Fluvoxamine may result in no difference in all-cause mortality compared to placebo.                             |
| COVID-19-specific mortality<br>follow-up: 15 days<br>№ of participants:152<br>(1 RCT)(40)                                   | not estimable                    | 0.0%                                  | <b>0.0%</b><br>(0 to 0)      | <b>0.0% fewer</b><br>(0 fewer to 0 fewer)     | ○○○<br>Insufficient <sup>b</sup> | The evidence is very uncertain about the effect of fluvoxamine on COVID-specific mortality compared to placebo. |
| Recovery - not reported                                                                                                     | -                                | -                                     | -                            | -                                             | -                                |                                                                                                                 |
| Time to recovery - not reported                                                                                             | -                                | -                                     | -                            | -                                             | -                                |                                                                                                                 |
| Admission to hospital due to COVID-19<br>follow-up: range 15 days to 28 days<br>№ of participants:1,649<br>(2 RCTs)(39, 40) | <b>RR 0.71</b><br>(0.22 to 1.70) | 12.2%                                 | <b>9.1%</b><br>(2.7 to 20.7) | <b>3.1% fewer</b><br>(9.5 fewer to 8.5 more)  | ⊕○○<br>Low <sup>c,d</sup>        | Fluvoxamine may result in no difference in admission to hospital due to COVID-19 compared to placebo.           |
| Serious adverse events<br>follow-up: 15 days<br>№ of participants:152<br>(1 RCT)(40)                                        | <b>RR 0.18</b><br>(0.02 to 1.50) | 6.9%                                  | <b>1.3%</b><br>(0.1 to 10.4) | <b>5.6% fewer</b><br>(6.8 fewer to 3.5 more)  | ○○○<br>Insufficient <sup>e</sup> | The evidence is very uncertain about the effect of fluvoxamine on serious adverse events compared to placebo.   |
| Adverse events<br>follow-up: 15 days<br>№ of participants:152<br>(1 RCT)(40)                                                | <b>RR 0.98</b><br>(0.46 to 2.09) | 15.3%                                 | <b>15.0%</b><br>(7 to 31.9)  | <b>0.3% fewer</b><br>(8.3 fewer to 16.7 more) | ⊕○○<br>Low <sup>a</sup>          | Fluvoxamine may result in no difference in adverse events compared to placebo.                                  |

\*The risk in the intervention group (and its 95% confidence interval) is based on the assumed risk in the comparison group and the **relative effect** of the intervention (and its 95% CI).

CI: confidence interval (1 study) or credible interval (≥2 studies); no: number; OR: odds ratio; RCT: randomized controlled trial; RR: risk ratio

### Explanations

- a. Few events; downgraded 2 steps for imprecision
- b. No events; downgraded 3 steps for imprecision
- c. Confidence intervals [0.22 to 1.70] are wide and encompass appreciable benefits or harms; downgraded 1 step for imprecision
- d. Few events; downgraded 1 step for imprecision, e. Very few events; downgraded 3 steps for imprecision

## Supplement Table 9: Subgroup Results

| Author, Year                                        | Age                                                                                                                                                                                                                     | Gender                                                                                                                                                                                                               | Comorbidity                                                                                                                                                                                                                                                                                                                                                                                                                                                                                                                 | Other                                                                                                                                                                                                                                                                                                                                                                                                                                |
|-----------------------------------------------------|-------------------------------------------------------------------------------------------------------------------------------------------------------------------------------------------------------------------------|----------------------------------------------------------------------------------------------------------------------------------------------------------------------------------------------------------------------|-----------------------------------------------------------------------------------------------------------------------------------------------------------------------------------------------------------------------------------------------------------------------------------------------------------------------------------------------------------------------------------------------------------------------------------------------------------------------------------------------------------------------------|--------------------------------------------------------------------------------------------------------------------------------------------------------------------------------------------------------------------------------------------------------------------------------------------------------------------------------------------------------------------------------------------------------------------------------------|
| <b>Admission to hospitalization due to COVID-19</b> |                                                                                                                                                                                                                         |                                                                                                                                                                                                                      |                                                                                                                                                                                                                                                                                                                                                                                                                                                                                                                             |                                                                                                                                                                                                                                                                                                                                                                                                                                      |
| <i>Ivermectin</i>                                   |                                                                                                                                                                                                                         |                                                                                                                                                                                                                      |                                                                                                                                                                                                                                                                                                                                                                                                                                                                                                                             |                                                                                                                                                                                                                                                                                                                                                                                                                                      |
| Reis et al. 2022(49)                                | Age ≤50 yr:<br>G1: 38/335<br>G2: 39/347<br>RR 1.01 (95% CI 0.66 to 1.53)<br>Age >50 yr:<br>G1: 53/295<br>G2: 66/283<br>RR 0.77 (95% CI 0.56 to 1.06)                                                                    | Female:<br>G1:47/383<br>G2:59/408<br>RR (95% CI): 0.85 (0.59–1.21)<br>Male:<br>G1:53/296<br>G2:52/271<br>RR 0.93 (95% CI 0.66 to 1.32)                                                                               | Body-mass index <30:<br>G1: 38/345<br>G2: 48/333<br>RR 0.77 (95% CI 0.51 to 1.14)<br>Body-mass index ≥30:<br>G1:60/330<br>G2:63/339<br>RR 0.98 (95% CI 0.71 to 1.34)<br>Cardiovascular disease = Yes:<br>G1:47/282<br>G2:53/272<br>RR (95% CI): 0.86 (0.60–1.22)<br>Cardiovascular disease = No:<br>G1:53/397<br>G2:58/407<br>RR 0.94 (95% CI 0.66 to 1.32)<br>Lung disease = Yes:<br>G1:4/14<br>G2:5/14<br>RR 0.83 (95% CI 0.28 to 2.26)<br>Lung disease = No:<br>G1:96/665<br>G2:106/664<br>RR 0.90 (95% CI 0.70 to 1.17) | Smoking status = Current:<br>G1: 5/50<br>G2:5/59<br>RR 1.18 (0.38 to 3.63)<br>Smoking status = Former:<br>G1:15/94<br>G2:13/73<br>RR 0.89 (95% CI 0.46 to 1.75)<br>Smoking status = Never:<br>G1:80/535<br>G2:93/545<br>RR 0.88 (95% CI 0.67 to 1.15)<br>Time since onset of symptoms:<br>0–3 days:<br>G1: 41/282<br>G2:35/276<br>RR 1.14 (95% CI 0.76 to 1.74)<br>4–7 days:<br>G1:43/242<br>G2:43/241<br>95% CI 1.00 (0.68 to 1.46) |
| <i>Lopinavir/Ritonavir, Chloroquine</i>             |                                                                                                                                                                                                                         |                                                                                                                                                                                                                      |                                                                                                                                                                                                                                                                                                                                                                                                                                                                                                                             |                                                                                                                                                                                                                                                                                                                                                                                                                                      |
| Reis et al. 2021 (30)                               | Age <50<br>G1: 0/77 RR 0.13 (95% CI 0.01 to 2.54)<br>G2: 3/89 RR 0.81 (95% CI 0.17 to 3.89)<br>G3: 3/72<br>Age ≥=50<br>G1: 8/133 RR 1.13 (95% CI 0.44 to 2.92)<br>G2: 11/149 RR 1.38 (95% CI 0.57 to 3.34)<br>G3: 8/150 | Female<br>G1: 5/122 RR 1.24 (95% CI 0.24 to 4.51)<br>G2: 3/134 RR 1.83 (95% CI 0.45 to 7.50)<br>G3: 4/121<br>Male<br>G1: 3/92 RR 0.49 (95% CI 0.13 to 1.85)<br>G2: 11/110 RR 0.33 (95% CI 0.09 to 1.13)<br>G3: 7/106 | Diabetes = no<br>G1: 5/173 RR 0.58 (95% CI 0.20 to 1.69)<br>G2: 9/200 RR 0.90 (95% CI 0.37 to 2.22)<br>G3: 9/180<br>Diabetes = yes<br>G1: 3/40 RR 1.76 (95% CI 0.31 to 10.03)<br>G2: 5/43 RR 2.73 (95% CI 0.56 to 13.36)<br>G3: 2/47<br>Cardiac Disease = no<br>G1: 4/111 RR 1.06 (95% CI 0.27 to 4.15)<br>G2: 6/111 RR 1.59 (95% CI 0.46 to 5.50)<br>G3: 4/118<br>Cardiac Disease = yes<br>G1: 4/103 RR 0.60 (95% CI 0.18 to 2.00)<br>G2: 8/133 RR 0.94 (95% CI 0.35 to 2.50)<br>G3: 7/109                                 | Symptom Onset <120 hours<br>G1: 1/37 RR 3.24 (95% CI 0.14 to 77.01)<br>G2: 2/34 RR 5.86 (95% CI 0.29 to 117.86)<br>G3: 0/40<br>Symptom Onset ≥=120 hours<br>G1: 7/177 RR 0.67 (95% CI 0.27 to 1.70)<br>G2: 12/210 RR 0.97 (95% CI 0.44 to 2.25)<br>G3: 11/187                                                                                                                                                                        |

| Author, Year                  | Age                                                                                                                                                                                                   | Gender                                                                                                                                                                                                          | Comorbidity                                                                                                                                                                                                                                                                                                                                                                                                                                                                                                                                                       | Other                                                                                                                                                                                                                                                                                                                                                                                                                                                                                                                                                                                                                                                                                                                                    |
|-------------------------------|-------------------------------------------------------------------------------------------------------------------------------------------------------------------------------------------------------|-----------------------------------------------------------------------------------------------------------------------------------------------------------------------------------------------------------------|-------------------------------------------------------------------------------------------------------------------------------------------------------------------------------------------------------------------------------------------------------------------------------------------------------------------------------------------------------------------------------------------------------------------------------------------------------------------------------------------------------------------------------------------------------------------|------------------------------------------------------------------------------------------------------------------------------------------------------------------------------------------------------------------------------------------------------------------------------------------------------------------------------------------------------------------------------------------------------------------------------------------------------------------------------------------------------------------------------------------------------------------------------------------------------------------------------------------------------------------------------------------------------------------------------------------|
|                               |                                                                                                                                                                                                       |                                                                                                                                                                                                                 | Lung Disease = no<br>G1: 8/190 RR 0.87 (95% CI 0.35 to 2.16)<br>G2: 13/229 RR 1.18 (95% CI 0.53 to 2.62)<br>G3: 10/207<br>Lung Disease = yes<br>G1: 0/24 RR 0.28 (95% CI 0.01 to 6.50)<br>G2: 1/15 RR 1.33 (95% CI 0.09 to 19.64)<br>G3: 1/20                                                                                                                                                                                                                                                                                                                     |                                                                                                                                                                                                                                                                                                                                                                                                                                                                                                                                                                                                                                                                                                                                          |
| <i>Molnupiravir</i>           |                                                                                                                                                                                                       |                                                                                                                                                                                                                 |                                                                                                                                                                                                                                                                                                                                                                                                                                                                                                                                                                   |                                                                                                                                                                                                                                                                                                                                                                                                                                                                                                                                                                                                                                                                                                                                          |
| Jayk Bernal et al. 2022 (33)  | Incidence of hospitalization or death:<br>At day 29:<br>>60 years:<br>G1: 12/118; G2: 16/127; ARR -2.4 (95% CI -10.6 to 5.8)<br>≤60 years:<br>G1: 36/591; G2: 52/572;<br>ARR(95% CI) -3.0 (-6.1, 0-0) | Incidence of hospitalization or death:<br>At day 29:<br>Female<br>G1: 16/379; G2: 27/344;<br>ARR(95% CI) -3.6 (95% CI -7.4 to -0.2)<br>Male<br>G1: 32/330; G2: 41/355;<br>ARR(95% CI) -1.9 (95% CI -6.5 to 2.8) | Incidence of hospitalization or death:<br>At day 29:<br>Obesity = yes<br>G1: 29/535; G2: 46/507; ARR -3.7 (95% CI -6.9 to -0.5)<br>Obesity = no<br>G1: 19/174; G2: 22/192; ARR -0.5 (95% CI -7.1 to 6.2)<br>Diabetes Mellitus = yes<br>G1: 17/107; G2: 17/117; ARR 1.4 (95% CI -8.2 to 11-1)<br>Diabetes Mellitus = no<br>G1: 31/602; G2: 51/582; ARR -3.6 (95% CI -6.6 to -0.7)<br>Serious Heart condition = yes<br>G1: 8/86; G2: 9/78; ARR -2.2 (95% CI -12.4 to 7-5)<br>Serious Heart condition = no<br>G1: 40/623; G2: 59/621; ARR -3.1 (95% CI -6.2 to -0.1) | Incidence of hospitalization or death:<br>At day 29:<br>Days since onset of symptoms = ≤3<br>G1:25/339; G2: 28/335; ARR -1.0 (95% CI -5.2 to 3.2)<br>Days since onset of symptoms = >3<br>G1: 23/370; G2: 40/364; ARR -4.8 (95% CI -9.0 to -0.7)<br>Baseline Covid-19 severity = mild<br>G1: 19/395; G2: 27/376; ARR -2.4 (95% CI -5.9 to 1.0)<br>Baseline Covid-19 severity = moderate<br>G1: 29/311; G2: 40/321; ARR -3.1 (95% CI -8.1 to 1.8)<br>Variant = Gamma<br>G1: 0/37; G2: 9/47; ARR -19.1 (95% CI -32.6 to -8.9)<br>Variant = Delta<br>G1: 18/237; G2: 22/221; ARR -2.4 (95% CI -7.8 to 2.9)<br>Variant = Mu<br>G1: 6/75; G2: 13/82; ARR -7.9 (95% CI -18.5 to 2.6)<br>Other<br>G1: 5/47; G2: 7/38; ARR (95% CI -24.4 to 7.4) |
| <i>Nirmatrelvir/Ritonavir</i> |                                                                                                                                                                                                       |                                                                                                                                                                                                                 |                                                                                                                                                                                                                                                                                                                                                                                                                                                                                                                                                                   |                                                                                                                                                                                                                                                                                                                                                                                                                                                                                                                                                                                                                                                                                                                                          |
| Hammond et al. 2022 (35)      | At 28 days:<br><65 yr:<br>G1: 7/908; G2: 46/909 -4.35% difference (95% CI -5.91 to -2.79)<br>≥65 yr:<br>G1: 1/131; G2: 20/137 -13.93% difference (95% CI -20.07 to -7.80)                             | At 28 days:<br>Female<br>G1: 4/519; G2: 25/506; -4.23% difference (95% CI -6.29 to -2.17)<br>Male<br>G1: 4/520; G2: 41/540; -6.93% difference (95% CI -9.32 to -4.53)                                           | BMI = <25<br>G1: 1/209; G2: 9/207; -3.88% difference (95% CI -6.83 to -0.94)<br>BMI = 25 to <30<br>G1: 3/458; G2: 28/466; -5.44% difference (95% CI -0.75 to -3.13)<br>BMI = ≥30<br>G1: 4/371; G2: 29/373; -6.85% difference (95% CI -9.82 to -3.87)<br>Diabetes mellitus = yes<br>G1: 2/125; G2: 9/127; -5.51% difference (95% CI -10.51 to -0.52)<br>Diabetes mellitus = no<br>G1: 6/913; G2: 57/919; -5.63% difference (95% CI -7.30 to -3.96)<br>Number of comorbidities = 0-1                                                                                | At 28 days:<br>Time since symptom onset = ≤3 days<br>G1: 5/697; G2: 44/682; -5.81% difference (95% CI -7.78 to -3.84)<br>Time since symptom onset = >3 days<br>G1: 3/342; G2: 22/364; -5.23% difference (95% CI -7.91 to -2.55)                                                                                                                                                                                                                                                                                                                                                                                                                                                                                                          |

| Author, Year                    | Age                                                                                | Gender                                                                     | Comorbidity                                                                                                                                                                                                                                                                                                                                                                                                                                   | Other                                                                                                                                                                                                                                                                                                                                                                                                                        |
|---------------------------------|------------------------------------------------------------------------------------|----------------------------------------------------------------------------|-----------------------------------------------------------------------------------------------------------------------------------------------------------------------------------------------------------------------------------------------------------------------------------------------------------------------------------------------------------------------------------------------------------------------------------------------|------------------------------------------------------------------------------------------------------------------------------------------------------------------------------------------------------------------------------------------------------------------------------------------------------------------------------------------------------------------------------------------------------------------------------|
|                                 |                                                                                    |                                                                            | G1: 4/829; G2: 43/832; -4.76% difference (95% CI -6.37 to -3.16)<br>Number of comorbidities = 2-3:<br>G1: 4/206; G2: 23/211; -8.96% difference (95% CI -13.59 to -4.32)<br>Number of comorbidities = at least 4:<br>G1: 0/4; G2: 0/3; 0.00 (0.00 to 0.00)                                                                                                                                                                                     |                                                                                                                                                                                                                                                                                                                                                                                                                              |
| <b>Remdesivir</b>               |                                                                                    |                                                                            |                                                                                                                                                                                                                                                                                                                                                                                                                                               |                                                                                                                                                                                                                                                                                                                                                                                                                              |
| Gottlieb et al. 2021 (44)       | age ≥60 years<br>G1: 1/83 (1.2); G2: 9/87 (10.3);<br>HR 0.11 (95% CI 0.01 to 0.86) | Male<br>G1: 1/148 (0.7); G2: 9/145 (6.2);<br>HR 0.11 (95% CI 0.01 to 0.84) | Diabetes mellitus<br>G1: 2/173 (1.2); G2: 14/173 (8.1);<br>HR 0.14 (95% CI 0.03 to 0.63)<br>Obesity<br>G1: 1/154 (0.6); G2: 9/156 (5.8);<br>HR 0.11 (95% CI 0.01 to 0.88)<br>Hypertension<br>G1: 2/138 (1.4); G2: 10/130 (7.7);<br>HR 0.17 (95% CI 0.04 to 0.76)<br>Chronic lung disease:<br>G1: 0/67; G2: 4/68 (5.9)<br>Cardiovascular or cerebrovascular disease<br>G1: 0/20; G2: 2/24 (8.3)<br>Current cancer<br>G1: 0/12; G2: 2/18 (11.1) | Incidence of hospitalization or death at day 28: residence in the United States<br>G1: 2/264; G2: 12/267;<br>HR 0.17 (95% CI 0.04 to 0.76)<br>Ethnic group = not Hispanic or Latinx<br>G1: 2/146 (1.4); G2: 8/158 (5.1); HR 0.26 (95% CI 0.06 to 1.22)<br>Ethnic group: Hispanic or Latinx:<br>G1: 0/123; G2: 6/112 (5.4)                                                                                                    |
| <b>Regdanvimab</b>              |                                                                                    |                                                                            |                                                                                                                                                                                                                                                                                                                                                                                                                                               |                                                                                                                                                                                                                                                                                                                                                                                                                              |
| Streinu-Cercel et al. 2021 (34) | NR                                                                                 | NR                                                                         | NR                                                                                                                                                                                                                                                                                                                                                                                                                                            | mild versus moderate disease severity at 28 days:<br>G1: 0/38 vs 4/62 (6.5%)<br><i>RR 0.18 (95% CI 0.01 to 3.24)</i><br>G2: 0/40 vs 5/63 (7.9%)<br><i>RR 0.14 (95% CI 0.01 to 2.50)</i><br>G3: 0/46 vs 9/57 (15.8%)<br><i>RR 0.06 (95% CI 0.004 to 1.09)</i><br><br>subgroup moderate severity: all treatments versus placebo at 28 days:<br>G1+G2: 9/125 (7.2%)<br>G3: 9/57 (15.8%)<br><i>RR 0.46 (95% CI 0.19 to 1.09)</i> |
| <b>Convalescent Plasma</b>      |                                                                                    |                                                                            |                                                                                                                                                                                                                                                                                                                                                                                                                                               |                                                                                                                                                                                                                                                                                                                                                                                                                              |
| Sullivan et al. 2022 (46)       | NR                                                                                 | Female<br>G1: 9/323 (3%)<br>G2: 21/352 (6%)<br>Male<br>G1: 8/269 (3%)      | NR                                                                                                                                                                                                                                                                                                                                                                                                                                            | NR                                                                                                                                                                                                                                                                                                                                                                                                                           |

| Author, Year               | Age                                                                                                                                                                                                   | Gender                                                                                                                                                                                          | Comorbidity                                                                                                                                                                                                                                                                                                                                                                                                                                                                                                                                                                                                                                                                | Other                                                                                                                                                                                                                                                             |
|----------------------------|-------------------------------------------------------------------------------------------------------------------------------------------------------------------------------------------------------|-------------------------------------------------------------------------------------------------------------------------------------------------------------------------------------------------|----------------------------------------------------------------------------------------------------------------------------------------------------------------------------------------------------------------------------------------------------------------------------------------------------------------------------------------------------------------------------------------------------------------------------------------------------------------------------------------------------------------------------------------------------------------------------------------------------------------------------------------------------------------------------|-------------------------------------------------------------------------------------------------------------------------------------------------------------------------------------------------------------------------------------------------------------------|
|                            |                                                                                                                                                                                                       | G2: 16/237 (7%)                                                                                                                                                                                 |                                                                                                                                                                                                                                                                                                                                                                                                                                                                                                                                                                                                                                                                            |                                                                                                                                                                                                                                                                   |
| <i>Fluvoxamine</i>         |                                                                                                                                                                                                       |                                                                                                                                                                                                 |                                                                                                                                                                                                                                                                                                                                                                                                                                                                                                                                                                                                                                                                            |                                                                                                                                                                                                                                                                   |
| Reis et al. 2022 (39)      | Age: <=50<br>G1: 23/368 (6.3%)<br>G2: 41/379 (10.8%)<br>HR 0.57 (95% CI 0.34 to 0.95)<br>Age >50<br>G1: 50/327 (15.3%)<br>G2: 72/328 (22.0%)<br>HR 0.67 (95% CI 0.47 to 0.96)<br>p (interaction)=0.60 | Female<br>G1: 28/409 (6.8%)<br>G2: 61/453 (13.5%)<br>HR 0.49 (95% CI 0.31 to 0.77)<br>Male<br>G1: 51/376 (13.6%)<br>G2: 58/303 (19.1%)<br>HR 0.80 (95% CI 0.55 to 1.16)<br>p (interaction)=0.10 | BMI = <30<br>G1: 34/355 (9.6%)<br>G2: 52/373 (13.9%)<br>HR 0.67 (95% CI 0.44 to 1.03)<br>BMI = >30<br>G1: 44/376 (11.7%)<br>G2: 67/375 (17.9%)<br>HR 0.64 (95% CI 0.44 to 0.94)<br>p (interaction)=0.87<br>Cardiovascular disease = no<br>G1: 79/733<br>G2: 117/747<br>HR 0.67 (95% CI 0.45 to 1.00)<br>Cardiovascular disease = yes<br>G1: 0/4 (0%)<br>G2: 2/8 (25%)<br>HR 0.65 (95% CI 0.44 to 0.97)<br>p (interaction)=0.94<br>Chronic kidney disease = no<br>G1: 78/704 (11.1%)<br>G2: 115/702 (16.4%)<br>HR 0.66 (95% CI 0.50 to 0.88)<br>Chronic kidney disease = yes<br>G1: 1/35 (2.9%)<br>G2: 4/54 (7.4%)<br>HR 0.37 (95% CI 0.04 to 3.35)<br>p (interaction)=0.60 | Time from onset of symptoms = 0-3 days<br>G1: 30/328 (9.1%)<br>G2: 39/310 (12.6%)<br>HR 0.72 (95% CI 0.45 to 1.15)<br>Time from onset of symptoms = 4-7 days<br>G1: 31/239 (13.0%)<br>G2: 44/267 (16.5%)<br>HR 0.77 (95% CI 0.49 to 1.23)<br>p (interaction)=0.82 |
| Recovery                   |                                                                                                                                                                                                       |                                                                                                                                                                                                 |                                                                                                                                                                                                                                                                                                                                                                                                                                                                                                                                                                                                                                                                            |                                                                                                                                                                                                                                                                   |
| <i>Azithromycin</i>        |                                                                                                                                                                                                       |                                                                                                                                                                                                 |                                                                                                                                                                                                                                                                                                                                                                                                                                                                                                                                                                                                                                                                            |                                                                                                                                                                                                                                                                   |
| Oldenburg et al. 2021 (41) | absence of symptoms at 14 days:<br>Age <=60<br>G1: 61/121 (50%)<br>G2: 31/62 (50%)<br>RR 1.01 (95% CI 0.74 to 1.37)<br>Age >60<br>G1: 5/10 (50%)<br>G2: 4/8 (50%)<br>RR 1.00 (95% CI 0.39 to 2.53)    | NR                                                                                                                                                                                              | NR                                                                                                                                                                                                                                                                                                                                                                                                                                                                                                                                                                                                                                                                         | NR                                                                                                                                                                                                                                                                |
| Time to recovery           |                                                                                                                                                                                                       |                                                                                                                                                                                                 |                                                                                                                                                                                                                                                                                                                                                                                                                                                                                                                                                                                                                                                                            |                                                                                                                                                                                                                                                                   |
| <i>Regdanvimab</i>         |                                                                                                                                                                                                       |                                                                                                                                                                                                 |                                                                                                                                                                                                                                                                                                                                                                                                                                                                                                                                                                                                                                                                            |                                                                                                                                                                                                                                                                   |



| Author, Year                    | Age | Gender | Comorbidity | Other                                                                                                                                                                                 |
|---------------------------------|-----|--------|-------------|---------------------------------------------------------------------------------------------------------------------------------------------------------------------------------------|
| Streinu-Cercel et al. 2021 (34) |     |        |             | mild versus moderate disease severity at day 14: median (95% CI)<br>G1: 4.4 (2.2–7.7) vs 5.7 (4.1–7.3)<br>G2: 5.5 (3.2–7.6) vs 7.3 (5.6–10.7)<br>G3: 6.9 (4.8–8.8) vs 10.8 (6.8–n.c.) |

BMI: Body Mass Index; RR: risk ratio; HR: hazard ratio; ARR: absolute risk reduction; CI: confidence interval; NR: not reported; G1: group 1; G2: group 2; G3: group 3

### Supplement Table 10: Studies Identified in First Surveillance Search (August 17, 2022)

| <i>Author, Year</i><br><i>Risk of bias</i>     | <i>Population</i>                                                                                                                                                                                        | <i>N total (randomized),<br/>Interventions,<br/>N group</i>                                                        | <i>Outcomes<br/>(Follow-up Duration)</i>                                                                                                                                                                                                                                                                        | <i>Summary of Results</i>                                                                                 |
|------------------------------------------------|----------------------------------------------------------------------------------------------------------------------------------------------------------------------------------------------------------|--------------------------------------------------------------------------------------------------------------------|-----------------------------------------------------------------------------------------------------------------------------------------------------------------------------------------------------------------------------------------------------------------------------------------------------------------|-----------------------------------------------------------------------------------------------------------|
| Biber, 2022 (50)<br><br>Some concerns          | Adults with molecular confirmation of COVID-19 by RT-PCR, who received results within the first 7 days from symptom onset. Asymptomatic cases were also included within 5 days from molecular diagnosis. | N=116<br><br>Ivermectin 12 or 15 mg: 57<br><br>Placebo: 59                                                         | <ul style="list-style-type: none"> <li>Admission to hospital due to COVID-19</li> <li>Incidence of adverse events</li> </ul><br>(14 days)                                                                                                                                                                       | No statistically significant difference was observed for the outcomes of interest between the two groups. |
| Caraco, 2022 (51)<br><br>Low                   | Adults with mild or moderate, laboratory confirmed Covid-19 with onset of Covid-19 signs and/or symptoms up to (and including) 7 days before randomization.                                              | N=302<br><br>Molnupiravir 200mg: 75<br><br>Molnupiravir 400mg: 77<br><br>Molnupiravir 800mg: 76<br><br>Placebo: 74 | <ul style="list-style-type: none"> <li>All-cause mortality</li> <li>COVID-19-related mortality</li> <li>Admission to hospital due to COVID-19</li> <li>Incidence of adverse events</li> <li>Incidence of serious adverse events</li> </ul><br>(29 days)                                                         | No statistically significant difference was observed for the outcomes of interest between the two groups. |
| Mirahmadizadeh, 2022 (52)<br><br>Some concerns | Adults with mild symptomatic COVID-19 confirmed by RT-PCR test and symptom onset-to-visit interval of less than 48 h.                                                                                    | N=393<br><br>Ivermectin 12 mg: 131<br><br>Ivermectin 24 mg: 131<br><br>Placebo: 131                                | <ul style="list-style-type: none"> <li>All-cause mortality</li> <li>COVID-19-related mortality</li> <li>Recovery</li> <li>Symptom duration time until symptom free)</li> <li>Admission to hospital due to COVID-19</li> <li>Incidence of adverse events</li> <li>Incidence of serious adverse events</li> </ul> | No statistically significant difference was observed for the outcomes of interest between the two groups. |

|                                  |                                                                                                                                                                                                                                                                                                                              |                                                                        |                                                                                                                                                                                                                                                                   |                                                                                                                                                                                                                                                                                                                                                                                        |
|----------------------------------|------------------------------------------------------------------------------------------------------------------------------------------------------------------------------------------------------------------------------------------------------------------------------------------------------------------------------|------------------------------------------------------------------------|-------------------------------------------------------------------------------------------------------------------------------------------------------------------------------------------------------------------------------------------------------------------|----------------------------------------------------------------------------------------------------------------------------------------------------------------------------------------------------------------------------------------------------------------------------------------------------------------------------------------------------------------------------------------|
|                                  |                                                                                                                                                                                                                                                                                                                              |                                                                        | (28 and 29 days)                                                                                                                                                                                                                                                  |                                                                                                                                                                                                                                                                                                                                                                                        |
| Montgomery, 2022 (53)<br><br>Low | Adults with a documented laboratory-confirmed SARS-CoV-2 infection, as determined by RT-PCR or an antigen test from any respiratory tract specimen collected 3 days or less before enrolment (day 1), a WHO Clinical Progression Scale score of more than 1 to less than 4, and who had not received a COVID-19 vaccination. | N=910<br><br>Tixagevimab–cilgavimab 600 mg: 456<br><br>Placebo: 454    | <ul style="list-style-type: none"> <li>• All-cause mortality</li> <li>• COVID-19-related mortality</li> <li>• Admission to hospital due to COVID-19</li> <li>• Incidence of adverse events</li> <li>• Incidence of serious adverse events</li> </ul><br>(29 days) | The incidence of COVID-19 deaths or progression to severe disease (RR 0.43; 95% CI 0.025 to 0.75), and incidence of adverse events (29% vs 36%; 0.81; 95% CI 0.67 to 0.98) were statistically significantly lower in the tixagevimab–cilgavimab group compared to placebo. There were three COVID-19-reported deaths in the tixagevimab–cilgavimab group and six in the placebo group. |
| Rezai, 2022 (54)<br><br>Low      | Patients, aged 5 years or more, weight more than 15 kg, with positive diagnostic by RT-PCR assay for SARS-CoV-2 using a nasopharyngeal swab ≤ 4 days prior to screening or positive rapid COVID-19 test, without evidence of viral pneumonia or hypoxia*.                                                                    | N=582<br><br>Ivermectin 6, 12, 18, 24 or 30 mg: 282<br><br>Placebo:300 | <ul style="list-style-type: none"> <li>• All-cause mortality</li> <li>• Recovery</li> <li>• Admission to hospital due to COVID-19</li> <li>• Incidence of adverse events</li> <li>• Incidence of serious adverse events</li> </ul><br>(5 and 7 days)              | No statistically significantly difference was observed for the outcomes of interest between the two groups.                                                                                                                                                                                                                                                                            |
| Seo, 2022 (55)<br><br>Low        | Adult patients with SARS-CoV-2 infection laboratory-confirmed by RT-PCR; patients with symptom onset less than 7 days after randomization and had positive RT-PCR results within 3 days of randomization were enrolled.                                                                                                      | N=52<br><br>Fluvoxamine 100 mg: 26<br><br>Placebo: 26                  | <ul style="list-style-type: none"> <li>• Admission to hospital due to COVID-19</li> <li>• Incidence of serious adverse events</li> </ul><br>(10 days)                                                                                                             | No statistically significantly difference was observed for the outcomes of interest between the two groups.                                                                                                                                                                                                                                                                            |

## References

1. Mathieu E, Ritchie H, Rodés-Guirao L, et al. Coronavirus (COVID-19) Deaths. Our World In Data. Accessed at <https://ourworldindata.org/covid-deaths?country=~USA> on 18 May 2022.
2. Woolf SH, Masters RK, Aron LY. Changes in life expectancy between 2019 and 2020 in the US and 21 peer countries. *JAMA Netw Open*. 2022;5:e227067. [PMID: 35416991] doi:10.1001/jamanetworkopen.2022.7067
3. Kreuzberger N, Hirsch C, Chai KL, et al. SARS-CoV-2-neutralising monoclonal antibodies for treatment of COVID-19. *Cochrane Database Syst Rev*. 2021;9:CD013825. [PMID: 34473343] doi:10.1002/14651858.CD013825.pub2
4. Popp M, Stegemann M, Riemer M, et al. Antibiotics for the treatment of COVID-19. *Cochrane Database Syst Rev*. 2021;10:CD015025. [PMID: 34679203] doi:10.1002/14651858.CD015025
5. Singh B, Ryan H, Kredo T, et al. Chloroquine or hydroxychloroquine for prevention and treatment of COVID-19. *Cochrane Database Syst Rev*. 2021;2:CD013587. [PMID: 33624299] doi:10.1002/14651858.CD013587.pub2
6. Popp M, Reis S, Schießler S, et al. Ivermectin for preventing and treating COVID-19. *Cochrane Database Syst Rev*. 2022;6:CD015017. [PMID: 35726131] doi:10.1002/14651858.CD015017.pub3
7. Griesel M, Wagner C, Mikolajewska A, et al. Inhaled corticosteroids for the treatment of COVID-19. *Cochrane Database Syst Rev*. 2022;3:CD015125. [PMID: 35262185] doi:10.1002/14651858.CD015125
8. Wagner C, Griesel M, Mikolajewska A, et al. Systemic corticosteroids for the treatment of COVID-19. *Cochrane Database Syst Rev*. 2021;8:CD014963. [PMID: 34396514] doi:10.1002/14651858.CD014963
9. Piechotta V, Iannizzi C, Chai KL, et al. Convalescent plasma or hyperimmune immunoglobulin for people with COVID-19: a living systematic review. *Cochrane Database Syst Rev*. 2021;5:CD013600. [PMID: 34013969] doi:10.1002/14651858.CD013600.pub4
10. Reis S, Metzendorf MI, Kuehn R, et al. Nirmatrelvir combined with ritonavir for preventing and treating COVID-19. *Cochrane Database Syst Rev*. 2022;9:CD015395. [PMID: 36126225] doi:10.1002/14651858.CD015395.pub2
11. Garrity C, Gartlehner G, Nussbaumer-Streit B, et al. Cochrane Rapid Reviews Methods Group offers evidence-informed guidance to conduct rapid reviews. *J Clin Epidemiol*. 2021;130:13-22. [PMID: 33068715] doi:10.1016/j.jclinepi.2020.10.007
12. Page MJ, Moher D, Bossuyt PM, et al. PRISMA 2020 explanation and elaboration: updated guidance and exemplars for reporting systematic reviews. *BMJ*. 2021;372:n160. [PMID: 33781993] doi:10.1136/bmj.n160
13. Epistemonikos. L·OVE Platform. Accessed at <https://app.iloveevidence.com/topics> on 21 September 2022.
14. Qaseem A, Yost J, Forciea MA, et al; Scientific Medical Policy Committee of the American College of Physicians. The development of living, rapid practice points: summary of methods from the Scientific

- Medical Policy Committee of the American College of Physicians. *Ann Intern Med.* 2021;174:1126-32. [PMID: 34029483] doi:10.7326/M20-7641
15. Boutron I, Chaimani A, Meerpohl JJ, et al; COVID-NMA Consortium. The COVID-NMA project: building an evidence ecosystem for the COVID-19 pandemic [Editorial]. *Ann Intern Med.* 2020;173:1015-7. [PMID: 32931326] doi:10.7326/M20-5261
  16. Sterne JAC, Savovic J, Page MJ, et al. RoB 2: a revised tool for assessing risk of bias in randomised trials. *BMJ.* 2019;366:l4898. [PMID: 31462531] doi:10.1136/bmj.l4898
  17. Kruschke JK, Liddell TM. The Bayesian New Statistics: Hypothesis testing, estimation, meta-analysis, and power analysis from a Bayesian perspective. *Psychon Bull Rev.* 2018;25:178-206. [PMID: 28176294] doi:10.3758/s13423-016-1221-4
  18. Gronau QF, Heck DW, Berkhout SW, et al. A primer on Bayesian model-averaged meta-analysis. *Adv Methods Pract Psychol Sci.* 2021;4:1-19. doi:10.1177/25152459211031256
  19. R Core Team. *R: A Language and Environment for Statistical Computing.* R Foundation for Statistical Computing; 2022.
  20. Röver C. Bayesian random-effects meta-analysis using the bayesmeta R package. *J Stat Softw.* 2020;93:1-51. doi:10.18637/jss.v093.i06
  21. Viechtbauer W. Conducting meta-analyses in R with the metafor package. *J Stat Softw.* 2010;36:1-48. doi:10.18637/jss.v036.i03
  22. West SL, Gartlehner G, Mansfield AJ, et al. *Comparative Effectiveness Review Methods: Clinical Heterogeneity.* Report no. 10-EHC070-EF. Agency for Healthcare Research and Quality; 2010. [PMID: 21433337]
  23. Balshem H, Helfand M, Schünemann HJ, et al. GRADE guidelines: 3. Rating the quality of evidence. *J Clin Epidemiol.* 2011;64:401-6. [PMID: 21208779] doi:10.1016/j.jclinepi.2010.07.015
  24. Libster R, Pérez Marc G, Wappner D, et al; Fundación INFANT–COVID-19 Group. Early high-titer plasma therapy to prevent severe Covid-19 in older adults. *N Engl J Med.* 2021;384:610-8. [PMID: 33406353] doi:10.1056/NEJMoa2033700
  25. Weinreich DM, Sivapalasingam S, Norton T, et al; Trial Investigators. REGEN-COV antibody combination and outcomes in outpatients with Covid-19. *N Engl J Med.* 2021;385:e81. [PMID: 34587383] doi:10.1056/NEJMoa2108163
  26. López-Medina E, López P, Hurtado IC, et al. Effect of ivermectin on time to resolution of symptoms among adults with mild COVID-19: a randomized clinical trial. *JAMA.* 2021;325:1426-35. [PMID: 33662102] doi:10.1001/jama.2021.3071
  27. Schwartz I, Boesen ME, Cerchiaro G, et al; ALBERTA HOPE COVID-19 Collaborators. Assessing the efficacy and safety of hydroxychloroquine as outpatient treatment of COVID-19: a randomized controlled trial. *CMAJ Open.* 2021;9:E693-E702. [PMID: 34145052] doi:10.9778/cmajo.20210069

28. Omrani AS, Pathan SA, Thomas SA, et al. Randomized double-blinded placebo-controlled trial of hydroxychloroquine with or without azithromycin for virologic cure of non-severe Covid-19. *EClinicalMedicine*. 2020;29:100645. [PMID: 33251500] doi:10.1016/j.eclinm.2020.100645
29. Chaccour C, Casellas A, Blanco-Di Matteo A, et al. The effect of early treatment with ivermectin on viral load, symptoms and humoral response in patients with non-severe COVID-19: a pilot, double-blind, placebo-controlled, randomized clinical trial. *EClinicalMedicine*. 2021;32:100720. [PMID: 33495752] doi:10.1016/j.eclinm.2020.100720
30. Reis G, Moreira Silva EADS, Medeiros Silva DC, et al; TOGETHER Investigators. Effect of early treatment with hydroxychloroquine or lopinavir and ritonavir on risk of hospitalization among patients with COVID-19: the TOGETHER randomized clinical trial. *JAMA Netw Open*. 2021;4:e216468. [PMID: 33885775] doi:10.1001/jamanetworkopen.2021.6468
31. Fischer WA 2nd, Eron JJ Jr, Holman W, et al. A phase 2a clinical trial of molnupiravir in patients with COVID-19 shows accelerated SARS-CoV-2 RNA clearance and elimination of infectious virus. *Sci Transl Med*. 2022;14:eabl7430. [PMID: 34941423] doi:10.1126/scitranslmed.abl7430
32. Rocco PRM, Silva PL, Cruz FF, et al; SARITA-2 investigators. Early use of nitazoxanide in mild COVID-19 disease: randomised, placebo-controlled trial. *Eur Respir J*. 2021;58. [PMID: 33361100] doi:10.1183/13993003.03725-2020
33. Jayk Bernal A, Gomes da Silva MM, Musungaie DB, et al; MOVE-OUT Study Group. Molnupiravir for oral treatment of Covid-19 in nonhospitalized patients. *N Engl J Med*. 2022;386:509-20. [PMID: 34914868] doi:10.1056/NEJMoa2116044
34. Streinu-Cercel A, Sandulescu O, Preotescu LL, et al. Efficacy and safety of regdanvimab (CT-P59): a phase 2/3 randomized, double-blind, placebo-controlled trial in outpatients with mild-to-moderate coronavirus disease 2019. *Open Forum Infect Dis*. 2022;9:ofac053. [PMID: 35295819] doi:10.1093/ofid/ofac053
35. Hammond J, Leister-Tebbe H, Gardner A, et al; EPIC-HR Investigators. Oral nirmatrelvir for high-risk, nonhospitalized adults with Covid-19. *N Engl J Med*. 2022;386:1397-1408. [PMID: 35172054] doi:10.1056/NEJMoa2118542
36. Korley FK, Durkalski-Mauldin V, Yeatts SD, et al; SIREN-C3PO Investigators. Early convalescent plasma for high-risk outpatients with Covid-19. *N Engl J Med*. 2021;385:1951-60. [PMID: 34407339] doi:10.1056/NEJMoa2103784
37. Alemany A, Millat-Martinez P, Corbacho-Monné M, et al; CONV-ERT Group. High-titre methylene blue-treated convalescent plasma as an early treatment for outpatients with COVID-19: a randomised, placebo-controlled trial. *Lancet Respir Med*. 2022;10:278-88. [PMID: 35150610] doi:10.1016/S2213-2600(21)00545-2
38. Gupta A, Gonzalez-Rojas Y, Juarez E, et al; COMET-ICE Investigators. Effect of sotrovimab on hospitalization or death among high-risk patients with mild to moderate COVID-19: a randomized clinical trial. *JAMA*. 2022;327:1236-46. [PMID: 35285853] doi:10.1001/jama.2022.2832
39. Reis G, Dos Santos Moreira-Silva EA, Silva DCM, et al; TOGETHER investigators. Effect of early treatment with fluvoxamine on risk of emergency care and hospitalisation among patients with COVID-

- 19: the TOGETHER randomised, platform clinical trial. *Lancet Glob Health*. 2022;10:e42-e51. [PMID: 34717820] doi:10.1016/S2214-109X(21)00448-4
40. Lenze EJ, Mattar C, Zorumski CF, et al. Fluvoxamine vs placebo and clinical deterioration in outpatients with symptomatic COVID-19: a randomized clinical trial. *JAMA*. 2020;324:2292-2300. [PMID: 33180097] doi:10.1001/jama.2020.22760
41. Oldenburg CE, Pinsky BA, Brogdon J, et al. Effect of oral azithromycin vs placebo on COVID-19 symptoms in outpatients with SARS-CoV-2 infection: a randomized clinical trial. *JAMA*. 2021;326:490-8. [PMID: 34269813] doi:10.1001/jama.2021.11517
42. Kim JY, Jang YR, Hong JH, et al. Safety, virologic efficacy, and pharmacokinetics of CT-P59, a neutralizing monoclonal antibody against SARS-CoV-2 spike receptor-binding protein: two randomized, placebo-controlled, phase I studies in healthy individuals and patients with mild SARS-CoV-2 infection. *Clin Ther*. 2021;43:1706-27. [PMID: 34551869] doi:10.1016/j.clinthera.2021.08.009
43. Rossignol JF, Bardin MC, Fulgencio J, et al. A randomized double-blind placebo-controlled clinical trial of nitazoxanide for treatment of mild or moderate COVID-19. *EClinicalMedicine*. 2022;45:101310. [PMID: 35237748] doi:10.1016/j.eclinm.2022.101310
44. Gottlieb RL, Vaca CE, Paredes R, et al; GS-US-540-9012 (PINETREE) Investigators. Early remdesivir to prevent progression to severe Covid-19 in outpatients. *N Engl J Med*. 2022;386:305-15. [PMID: 34937145] doi:10.1056/NEJMoa2116846
45. Ezer N, Belga S, Daneman N, et al. Inhaled and intranasal ciclesonide for the treatment of Covid-19 in adult outpatients: CONTAIN phase II randomised controlled trial. *BMJ*. 2021;375:e068060. [PMID: 34728476] doi:10.1136/bmj-2021-068060
46. Sullivan DJ, Gebo KA, Shoham S, et al. Early outpatient treatment for Covid-19 with convalescent plasma. *N Engl J Med*. 2022;386:1700-11. [PMID: 35353960] doi:10.1056/NEJMoa2119657
47. Vallejos J, Zoni R, Bangher M, et al. Ivermectin to prevent hospitalizations in patients with COVID-19 (IVERCOR-COVID19) a randomized, double-blind, placebo-controlled trial. *BMC Infect Dis*. 2021;21:635. [PMID: 34215210] doi:10.1186/s12879-021-06348-5
48. Buonfrate D, Chesini F, Martini D, et al. High-dose ivermectin for early treatment of COVID-19 (COVER study): a randomised, double-blind, multicentre, phase II, dose-finding, proof-of-concept clinical trial. *Int J Antimicrob Agents*. 2022;59:106516. [PMID: 34999239] doi:10.1016/j.ijantimicag.2021.106516
49. Reis G, Silva EASM, Silva DCM, et al; TOGETHER Investigators. Effect of early treatment with ivermectin among patients with Covid-19. *N Engl J Med*. 2022;386:1721-31. [PMID: 35353979] doi:10.1056/NEJMoa2115869
50. Biber A, Harmelin G, Lev D, et al. The effect of ivermectin on the viral load and culture viability in early treatment of nonhospitalized patients with mild COVID-19 - a double-blind, randomized placebo-controlled trial. *Int J Infect Dis*. 2022;122:733-40. [PMID: 35811080] doi:10.1016/j.ijid.2022.07.003
51. Caraco Y, Crofoot GE, Moncada PA, et al. Phase 2/3 trial of molnupiravir for treatment of Covid-19 in nonhospitalized adults. *NEJM Evidence*. 2022;1. doi:10.1056/EVIDoA2100043

52. Mirahmadizadeh A, Semati A, Heiran A, et al. Efficacy of single-dose and double-dose ivermectin early treatment in preventing progression to hospitalization in mild COVID-19: a multi-arm, parallel-group randomized, double-blind, placebo-controlled trial. *Respirology*. 2022;27:758-66. [PMID: 35738778] doi:10.1111/resp.14318
53. Montgomery H, Hobbs FDR, Padilla F, et al; TACKLE study group. Efficacy and safety of intramuscular administration of tixagevimab-cilgavimab for early outpatient treatment of COVID-19 (TACKLE): a phase 3, randomised, double-blind, placebo-controlled trial. *Lancet Respir Med*. 2022;10:985-96. [PMID: 35688164] doi:10.1016/S2213-2600(22)00180-1
54. Rezai MS, Ahangarkani F, Hill A, et al. Non-effectiveness of ivermectin on inpatients and outpatients with COVID-19; results of two randomized, double-blinded, placebo-controlled clinical trials. *Front Med (Lausanne)*. 2022;9:919708. [PMID: 35783616] doi:10.3389/fmed.2022.919708
55. Seo H, Kim H, Bae S, et al. Fluvoxamine treatment of patients with symptomatic COVID-19 in a community treatment center: a preliminary result of randomized controlled trial. *Infect Chemother*. 2022;54:102-13. [PMID: 35384422] doi:10.3947/ic.2021.0142
56. Butler CC, Hobbs FDR, Gbinigie OA, et al. Molnupiravir plus usual care versus usual care alone as early treatment for adults with COVID-19 at increased risk of adverse outcomes (PANORAMIC): preliminary analysis from the United Kingdom randomised, controlled open-label, platform adaptive trial. SSRN. Preprint posted online 17 October 2022. doi:10.2139/ssrn.4237902
57. Arora P, Kempf A, Nehlmeier I, et al. Augmented neutralisation resistance of emerging Omicron subvariants BA.2.12.1, BA.4, and BA.5 [Letter]. *Lancet Infect Dis*. 2022;22:1117-8. [PMID: 35777385] doi:10.1016/S1473-3099(22)00422-4
58. Wang Q, Guo Y, Iketani S, et al. Antibody evasion by SARS-CoV-2 Omicron subvariants BA.2.12.1, BA.4 and BA.5. *Nature*. 2022;608:603-8. [PMID: 35790190] doi:10.1038/s41586-022-05053-w
59. Tuekprakhon A, Nutalai R, Djokaite-Guraliuc A, et al; OPTIC Consortium. Antibody escape of SARS-CoV-2 Omicron BA.4 and BA.5 from vaccine and BA.1 serum. *Cell*. 2022;185:2422-2433.e13. [PMID: 35772405] doi:10.1016/j.cell.2022.06.005
60. Global Change Data Lab. Our World in Data. Accessed at <https://ourworldindata.org/grapher/covid-cases-omicron?tab=chart&country=~USA> on 13 July 2022.
61. Cavazzoni P. Coronavirus (COVID-19) Update: FDA Limits Use of Certain Monoclonal Antibodies to Treat COVID-19 Due to the Omicron Variant. U.S. Food and Drug Administration; 2022. Accessed at [www.fda.gov/news-events/press-announcements/coronavirus-covid-19-update-fda-limits-use-certain-monoclonal-antibodies-treat-covid-19-due-omicron](http://www.fda.gov/news-events/press-announcements/coronavirus-covid-19-update-fda-limits-use-certain-monoclonal-antibodies-treat-covid-19-due-omicron) on 12 June 2022.
62. U.S. Food and Drug Administration. FDA updates Sotrovimab emergency use authorization. Accessed at [www.fda.gov/drugs/drug-safety-and-availability/fda-updates-sotrovimab-emergency-use-authorization](http://www.fda.gov/drugs/drug-safety-and-availability/fda-updates-sotrovimab-emergency-use-authorization) on 12 June 2022.
63. Takashita E, Yamayoshi S, Simon V, et al. Efficacy of antibodies and antiviral drugs against Omicron BA.2.12.1, BA.4, and BA.5 subvariants [Letter]. *N Engl J Med*. 2022;387:468-70. [PMID: 35857646] doi:10.1056/NEJMc2207519

64. Nyberg T, Ferguson NM, Nash SG, et al; COVID-19 Genomics UK (COG-UK) consortium. Comparative analysis of the risks of hospitalisation and death associated with SARS-CoV-2 Omicron (B.1.1.529) and Delta (B.1.617.2) variants in England: a cohort study. *Lancet*. 2022;399:1303-12. [PMID: 35305296] doi:10.1016/S0140-6736(22)00462-7
65. Centers for Disease Control and Prevention. COVID-19 Rebound After Paxlovid Treatment. 24 May 2022. Accessed at [https://emergency.cdc.gov/han/2022/pdf/CDC\\_HAN\\_467.pdf](https://emergency.cdc.gov/han/2022/pdf/CDC_HAN_467.pdf) on 20 September 2022.
66. Deo R, Choudhary MC, Moser C, et al; ACTIV-2/A5401 Study Team. Viral and symptom rebound in untreated COVID-19 infection [Preprint]. *medRxiv*. 2022. [PMID: 35982660] doi:10.1101/2022.08.01.22278278
67. Kaka AS, MacDonald R, Linskens EJ, et al. Major update 2: remdesivir for adults with COVID-19: a living systematic review and meta-analysis for the American College of Physicians practice points. *Ann Intern Med*. 2022;175:701-9. [PMID: 35226522] doi:10.7326/M21-4784
68. Lee TC, Vigod S, Bortolussi-Courval É, et al. Fluvoxamine for outpatient management of COVID-19 to prevent hospitalization: a systematic review and meta-analysis. *JAMA Netw Open*. 2022;5:e226269. [PMID: 35385087] doi:10.1001/jamanetworkopen.2022.6269
69. Castro M. Placebo versus best-available-therapy control group in clinical trials for pharmacologic therapies: which is better? *Proc Am Thorac Soc*. 2007;4:570-3. [PMID: 17878471]
70. Pierre O, Riveros C, Charpy S, et al. Secondary electronic sources demonstrated very good sensitivity for identifying studies evaluating interventions for COVID-19. *J Clin Epidemiol*. 2022;141:46-53. [PMID: 34555426] doi:10.1016/j.jclinepi.2021.09.022
71. Deeks JJ, Higgins JPT, Altman DG. Chapter 10: Analysing data and undertaking meta-analyses. In: Higgins JPT, Thomas J, Chandler J, et al, eds. *Cochrane Handbook for Systematic Reviews of Interventions* Version 6.3. The Cochrane Collaboration; February 2022. Accessed at [www.training.cochrane.org/handbook](http://www.training.cochrane.org/handbook) on 10 November 2022.
72. Li M, Lou F, Fan H. SARS-CoV-2 variant Omicron: currently the most complete "escapee" from neutralization by antibodies and vaccines. *Signal Transduct Target Ther*. 2022;7:28. [PMID: 35091532] doi:10.1038/s41392-022-00880-9
73. U.S. Food and Drug Administration. What is a Serious Adverse Event? Accessed at [www.fda.gov/safety/reporting-serious-problems-fda/what-serious-adverse-event](http://www.fda.gov/safety/reporting-serious-problems-fda/what-serious-adverse-event) on 10 November 2022.
74. Lowe DM, Brown LAK, Chowdhury K, et al. Favipiravir, lopinavir-ritonavir or combination therapy (FLARE): a randomised, double blind, 2x2 factorial placebo-controlled trial of early antiviral therapy in COVID-19. *medRxiv*. Preprint posted online 15 February 2022. doi:10.1101/2022.02.11.22270775
75. Dougan M, Azizad M, Chen P, et al. Bebtelovimab, alone or together with bamlanivimab and etesevimab, as a broadly neutralizing monoclonal antibody treatment for mild to moderate, ambulatory COVID-19. *medRxiv*. Preprint posted online 12 March 2022. doi:10.1101/2022.03.10.22272100
76. Amaravadi RK, Giles L, Carberry M, et al. Hydroxychloroquine for SARS-CoV-2 positive patients quarantined at home: the first interim analysis of a remotely conducted randomized clinical trial. *medRxiv*. Preprint posted online 26 February 2021. doi:10.1101/2021.02.22.21252228



77. Biber A, Mandelboim M, Harmelin G, et al. Favorable outcome on viral load and culture viability using ivermectin in early treatment of non-hospitalized patients with mild COVID-19 – a double-blind, randomized placebo-controlled trial. medRxiv. Preprint posted online 31 May 2021. doi:10.1101/2021.05.31.21258081
78. Mohan A, Tiwari P, Suri T, et al. Ivermectin in mild and moderate COVID-19 (RIVETCOV): a randomized, placebo-controlled trial. ResearchSquare. Preprint posted online 2 February 2021. doi:10.21203/rs.3.rs-191648/v1
79. Silva M, Espejo A, Pereyra ML, et al. Efficacy of nitazoxanide in reducing the viral load in COVID-19 patients. Randomized, placebo-controlled, single-blinded, parallel-group, pilot study. medRxiv. Preprint posted online 5 March 2021. doi:10.1101/2021.03.03.21252509
80. Clemency BM, Varughese R, Gonzalez-Rojas Y, et al. A randomized controlled trial of inhaled ciclesonide for outpatient treatment of symptomatic COVID-19 infections. medRxiv. Preprint posted online 12 September 2021. doi:10.1101/2021.09.07.21261811
